# Supplementary material for: Family-based Analysis of Allele-Specific Expression Reveals Mostly Simple, Intermediate-type of Inheritance
Source: Research Square preprint supplement (doi:10.21203/rs.3.rs-6515696/v1), 2025-06-05
Supplement: Supplementary file 1 [file 1d229d4f359e778d6eadc667.xlsx]

## Sheet: H_L
CHROM	POS	mother_GT	child_1_GT	child_2_GT	child_3_GT	child_4_GT	child_5_GT	child_6_GT	child_7_GT	child_8_GT	father_GT	ENSEMBL ID	gene_start	gene_end	TFBS_start	TFBS_end	TF	strand	consensus_sequence	VAR_GT	VAR_POS_in_consensus
CM023772.1	79571971	BB	AB	AB	AB	AB	AB	AB	AB	AB	AA	ENSOCUG00000009473	79564166	79616807	79571971	79571983	ETV1	-	NACCGGAAGTRN	G/T	12
CM023772.1	79571971	BB	AB	AB	AB	AB	AB	AB	AB	AB	AA	ENSOCUG00000009473	79564166	79616807	79571971	79571983	ELK3	-	NACCGGAAGTDN	G/T	12
CM023772.1	79572069	BB	AB	AB	AB	AB	AB	AB	AB	AB	AA	ENSOCUG00000009473	79564166	79616807	79572066	79572076	E2F6	-	DGGMGGGAAM	G/A	7
CM023772.1	79572069	BB	AB	AB	AB	AB	AB	AB	AB	AB	AA	ENSOCUG00000009473	79564166	79616807	79572066	79572076	E2F4	-	DGGCGGGAAN	G/A	7
CM023772.1	79572069	BB	AB	AB	AB	AB	AB	AB	AB	AB	AA	ENSOCUG00000009473	79564166	79616807	79572067	79572077	E2F1	+	TTMCCGCCCD	G/A	2
CM023772.1	79572072	BB	AB	AB	AB	AB	AB	AB	AB	AB	AA	ENSOCUG00000009473	79564166	79616807	79572066	79572076	E2F6	-	DGGMGGGAAM	G/A	4
CM023772.1	79572072	BB	AB	AB	AB	AB	AB	AB	AB	AB	AA	ENSOCUG00000009473	79564166	79616807	79572066	79572076	E2F4	-	DGGCGGGAAN	G/A	4
CM023772.1	79572072	BB	AB	AB	AB	AB	AB	AB	AB	AB	AA	ENSOCUG00000009473	79564166	79616807	79572067	79572077	E2F1	+	TTMCCGCCCD	G/A	5
CM023772.1	79572091	BB	AB	AB	AB	AB	AB	AB	AB	AB	AA	ENSOCUG00000009473	79564166	79616807	79572083	79572093	E2F1	-	TTMCCGCCCD	C/T	2
CM023772.1	79593154	BB	AB	AB	AB	AB	AB	AB	AB	AB	AA	ENSOCUG00000009473	79564166	79616807	79593143	79593155	MAX	-	NAMCACGTGBYN	T/C	1
CM023772.1	79593154	BB	AB	AB	AB	AB	AB	AB	AB	AB	AA	ENSOCUG00000009473	79564166	79616807	79593143	79593155	MYCN	+	NNCCACGTGGNN	T/C	11
CM023772.1	79593154	BB	AB	AB	AB	AB	AB	AB	AB	AB	AA	ENSOCUG00000009473	79564166	79616807	79593144	79593154	MYC	+	GCCAYGTGSY	T/C	10
CM023772.1	79895751	AA	AB	AB	AB	AB	AB	AB	AB	AB	BB	ENSOCUG00000015502	79887249	79898925	79895742	79895754	MYCN	+	NNCCACGTGGNN	G/A	9
CM023774.1	162665316	AA	AB	AB	AB	AB	AB	AB	AB	AB	BB	ENSOCUG00000000148	162663048	162672831	162665314	162665326	FOXA1	+	BNNTGTTTACWY	G/A	2
CM023775.1	26775014	AA	AB	AB	AB	AB	AB	AB	AB	AB	BB	ENSOCUG00000016709	26771140	26777026	26775002	26775014	ELF1	-	NWHCMGGAAGTN	A/G	0
CM023776.1	56147713	BB	AB	AB	AB	AB	AB	AB	AB	AB	AA	ENSOCUG00000021629	56145279	56155314	56147713	56147725	Foxa2	-	TGTTTACWYAGB	T/C	12
CM023776.1	56152545	BB	AB	AB	AB	AB	AB	AB	AB	AB	AA	ENSOCUG00000021629	56145279	56155314	56152540	56152552	TFAP2A	-	GSCCTSAGGSHA	C/G	7
CM023776.1	56152545	BB	AB	AB	AB	AB	AB	AB	AB	AB	AA	ENSOCUG00000021629	56145279	56155314	56152540	56152553	TFAP2A-var.3	-	GSCCTSAGGSHA	C/G	8
CM023778.1	149847437	AA	AB	AB	AB	AB	AB	AB	AB	AB	BB	ENSOCUG00000013971	149814079	149884403	149847433	149847445	Sox2	+	NNCCATTGTTNN	C/T	4
CM023779.1	112102904	BB	AB	AB	AB	AB	AB	AB	AB	AB	AA	ENSOCUG00000015331	112101943	112114650	112102900	112102910	ZNF263	-	RGGAGGASBA	T/C	6
CM023779.1	112111500	BB	AB	AB	AB	AB	AB	AB	AB	AB	AA	ENSOCUG00000015331	112101943	112114650	112111496	112111506	TEAD1	-	BACATTCCAR	G/A	6
CM023780.1	98166424	BB	AB	AB	AB	AB	AB	AB	AB	AB	AA	ENSOCUG00000009547	98150674	98337475	98166422	98166441	MAFK	-		C/G	17
CM023780.1	98169771	BB	AB	AB	AB	AB	AB	AB	AB	AB	AA	ENSOCUG00000009547	98150674	98337475	98169766	98169778	Sox2	-	NNCCATTGTTNN	C/T	7
CM023780.1	98179389	AA	AB	AB	AB	AB	AB	AB	AB	AB	BB	ENSOCUG00000009547	98150674	98337475	98179388	98179400	CTCF	-	CCACYAGGGGGC	G/A	11
CM023780.1	98179990	BB	AB	AB	AB	AB	AB	AB	AB	AB	AA	ENSOCUG00000009547	98150674	98337475	98179989	98180001	ELF1	+	NWHCMGGAAGTN	G/A	1
CM023780.1	98191536	AA	AB	AB	AB	AB	AB	AB	AB	AB	BB	ENSOCUG00000009547	98150674	98337475	98191532	98191542	Gfi1b	-	AAATCASWGC	G/A	6
CM023780.1	98195694	BB	AB	AB	AB	AB	AB	AB	AB	AB	AA	ENSOCUG00000009547	98150674	98337475	98195685	98195695	TEAD1	-	BACATTCCAR	A/ATCTCTCTCTCTTTCTCTCTCTCTCTC	1
CM023780.1	98204103	BB	AB	AB	AB	AB	AB	AB	AB	AB	AA	ENSOCUG00000009547	98150674	98337475	98204098	98204117	MAFK	-		G/A	14
CM023780.1	98204103	BB	AB	AB	AB	AB	AB	AB	AB	AB	AA	ENSOCUG00000009547	98150674	98337475	98204101	98204113	MAFG	+	TGCTGASTCAKC	G/A	2
CM023780.1	98204103	BB	AB	AB	AB	AB	AB	AB	AB	AB	AA	ENSOCUG00000009547	98150674	98337475	98204101	98204113	MAFF	+	TGCTGASTCAGC	G/A	2
CM023780.1	98204889	BB	AB	AB	AB	AB	AB	AB	AB	AB	AA	ENSOCUG00000009547	98150674	98337475	98204886	98204898	Foxa2	-	TGTTTACWYAGB	C/T	9
CM023780.1	98204889	BB	AB	AB	AB	AB	AB	AB	AB	AB	AA	ENSOCUG00000009547	98150674	98337475	98204889	98204901	FOXA1	-	BNNTGTTTACWY	C/T	12
CM023780.1	98208252	BB	AB	AB	AB	AB	AB	AB	AB	AB	AA	ENSOCUG00000009547	98150674	98337475	98208242	98208254	FOXA1	-	BNNTGTTTACWY	C/T	2
CM023780.1	98227747	AA	AB	AB	AB	AB	AB	AB	AB	AB	BB	ENSOCUG00000009547	98150674	98337475	98227740	98227750	POU5F1B	+	TATGCATATR	C/T	7
CM023780.1	98227747	AA	AB	AB	AB	AB	AB	AB	AB	AB	BB	ENSOCUG00000009547	98150674	98337475	98227743	98227755	Pou5f1::Sox2	-		C/T	8
CM023780.1	98227747	AA	AB	AB	AB	AB	AB	AB	AB	AB	BB	ENSOCUG00000009547	98150674	98337475	98227747	98227759	Sox2	-	NNCCATTGTTNN	C/T	12
CM023780.1	98227751	BB	AB	AB	AB	AB	AB	AB	AB	AB	AA	ENSOCUG00000009547	98150674	98337475	98227743	98227755	Pou5f1::Sox2	-		C/T	4
CM023780.1	98227751	BB	AB	AB	AB	AB	AB	AB	AB	AB	AA	ENSOCUG00000009547	98150674	98337475	98227747	98227759	Sox2	-	NNCCATTGTTNN	C/T	8
CM023780.1	98295204	AA	AB	AB	AB	AB	AB	AB	AB	AB	BB	ENSOCUG00000009547	98150674	98337475	98295202	98295214	NFKB1	+	NGGGGAATTCCC	C/T	2
CM023780.1	98295204	AA	AB	AB	AB	AB	AB	AB	AB	AB	BB	ENSOCUG00000009547	98150674	98337475	98295204	98295214	NFKB2	-	GGGGAATYCC	C/T	10
CM023783.1	38835874	BB	AB	AB	AB	AB	AB	AB	AB	AB	AA	ENSOCUG00000017890	38829980	38883920	38835869	38835879	NFIA	-	NBTGCCAANN	G/A	5
CM023783.1	38835879	AA	AB	AB	AB	AB	AB	AB	AB	AB	BB	ENSOCUG00000017890	38829980	38883920	38835869	38835879	NFIA	-	NBTGCCAANN	C/G	0
CM023783.1	38846813	AA	AB	AB	AB	AB	AB	AB	AB	AB	BB	ENSOCUG00000017890	38829980	38883920	38846805	38846817	MYBL1	+	ACCGTTAACSGY	G/A	8
CM023783.1	38846837	AA	AB	AB	AB	AB	AB	AB	AB	AB	BB	ENSOCUG00000017890	38829980	38883920	38846833	38846841	KLF4	-	CCCRCCCT	T/C	4
CM023783.1	38846956	AA	AB	AB	AB	AB	AB	AB	AB	AB	BB	ENSOCUG00000017890	38829980	38883920	38846946	38846956	E2F6	-	DGGMGGGAAM	C/A	0
CM023783.1	38848930	BB	AB	AB	AB	AB	AB	AB	AB	AB	AA	ENSOCUG00000017890	38829980	38883920	38848926	38848938	Foxa2	+	TGTTTACWYAGB	T/TCACACACACA	4
CM023783.1	38854589	BB	AB	AB	AB	AB	AB	AB	AB	AB	AA	ENSOCUG00000017890	38829980	38883920	38854579	38854591	SPI1	-	DAAAGAGGAAGT	T/C	2
CM023783.1	38876377	AA	AB	AB	AB	AB	AB	AB	AB	AB	BB	ENSOCUG00000017890	38829980	38883920	38876374	38876384	MYC	+	GCCAYGTGSY	C/CAAGT	3
CM023783.1	38876383	AA	AB	AB	AB	AB	AB	AB	AB	AB	BB	ENSOCUG00000017890	38829980	38883920	38876374	38876384	MYC	+	GCCAYGTGSY	A/T	9
CM023784.1	136814864	AA	AB	AB	AB	AB	AB	AB	AB	AB	BB	ENSOCUG00000025655	136807661	136858880	136814857	136814869	CEBPB	+	DATTATGCAATM	G/A	7
CM023784.1	136821072	AA	AB	AB	AB	AB	AB	AB	AB	AB	BB	ENSOCUG00000025655	136807661	136858880	136821061	136821079	GATA1::TAL1	+		T/G	11
CM023784.1	136821864	AA	AB	AB	AB	AB	AB	AB	AB	AB	BB	ENSOCUG00000025655	136807661	136858880	136821857	136821867	ZNF263	+	RGGAGGASBA	G/A	7
CM023784.1	136835768	BB	AB	AB	AB	AB	AB	AB	AB	AB	AA	ENSOCUG00000025655	136807661	136858880	136835764	136835774	NFIC	+	BWBTTGGCAV	T/C	4
CM023784.1	136835768	BB	AB	AB	AB	AB	AB	AB	AB	AB	AA	ENSOCUG00000025655	136807661	136858880	136835764	136835774	STAT3	-	NTTCCCGGAA	T/C	6
CM023784.1	136835768	BB	AB	AB	AB	AB	AB	AB	AB	AB	AA	ENSOCUG00000025655	136807661	136858880	136835765	136835775	NFIA	-	NBTGCCAANN	T/C	7
CM023785.1	37540685	BB	AB	AB	AB	AB	AB	AB	AB	AB	AA	ENSOCUG00000014237	37470430	37560100	37540683	37540695	CEBPB	-	DATTATGCAATM	A/G	10

## Sheet: L_M OR M_H
CHROM	POS	mother_GT	child_1_GT	child_2_GT	child_3_GT	child_4_GT	child_5_GT	child_6_GT	child_7_GT	child_8_GT	father_GT	ENSEMBL ID	gene_start	gene_end	TFBS_start	TFBS_end	TF	strand	consensus_sequence	VAR_GT	VAR_POS_in_consensus
CM023775.1	50792122	BB	BB	AB	AB	BB	AB	AB	BB	BB	AB	ENSOCUG00000027493	50755385	50836917	50792111	50792124	EOMES	-		C/T	H
CM023775.1	50792151	AA	AA	AB	AB	AA	AB	AB	AA	AA	AB	ENSOCUG00000027493	50755385	50836917	50792148	50792158	Esrrg	+	RACAGGAAGT	C/A	3
CM023775.1	50792151	AA	AA	AB	AB	AA	AB	AB	AA	AA	AB	ENSOCUG00000027493	50755385	50836917	50792148	50792160	ERG	+	NRCMGGAARTVN	C/A	3
CM023779.1	140264925	BB	AB	AB	BB	AB	BB	AB	AB	BB	AB	ENSOCUG00000017455	140262202	140270049	140264924	140264936	Ar	-	GWACABNNTGTN	G/A	11
CM023786.1	58237251	BB	BB	BB	AB	AB	BB	AB	BB	BB	AB	ENSOCUG00000000694	58217047	58237695	58237242	58237254	Ar	-	GWACABNNTGTN	G/A	3
CM023788.1	66456248	AB	AB	AA	AA	AB	AA	AB	AB	AA	AA	ENSOCUG00000002151	66453733	66456330	66456242	66456252	STAT3	+	NTTCCCGGAA	C/T	6
CM023790.1	59475745	AA	AB	AB	AA	AB	AB	AA	AB	AA	AB	ENSOCUG00000000422	59475597	59478656	59475738	59475748	Esrra	-	NNNMAGGTCA	C/T	3
CM023790.1	59476726	AA	AB	AB	AA	AB	AB	AA	AB	AA	AB	ENSOCUG00000000422	59475597	59478656	59476725	59476737	NFKB1	+	NGGGGAATTCCC	C/G	1
CM023790.1	59476728	AA	AB	AB	AA	AB	AB	AA	AB	AA	AB	ENSOCUG00000000422	59475597	59478656	59476725	59476737	NFKB1	+	NGGGGAATTCCC	G/GGGGA	3

## Sheet: L_H
CHROM	POS	mother_GT	child_1_GT	child_2_GT	child_3_GT	child_4_GT	child_5_GT	child_6_GT	child_7_GT	child_8_GT	father_GT	ENSEMBL ID	gene_start	gene_end	TFBS_start	TFBS_end	TF	strand	consensus_sequence	VAR_GT	VAR_POS_in_consensus
CM023773.1	20848936	AA	AB	AB	AB	AB	AB	AB	AB	AB	BB	ENSOCUG00000014668	20729497	20880716	20848936	20848946	TEAD4	-	YACATTCCAG	G/C	10
CM023773.1	20848936	AA	AB	AB	AB	AB	AB	AB	AB	AB	BB	ENSOCUG00000014668	20729497	20880716	20848936	20848946	TEAD1	-	BACATTCCAR	G/C	10
CM023773.1	54742565	AA	AB	AB	AB	AB	AB	AB	AB	AB	BB	ENSOCUG00000016756	54694440	54890018	54742557	54742569	HNF4G	+	RAGKYCAAAGTY	A/AT	8
CM023773.1	54742565	AA	AB	AB	AB	AB	AB	AB	AB	AB	BB	ENSOCUG00000016756	54694440	54890018	54742558	54742570	Rxra	+	RGGTCAAAGGTC	A/AT	7
CM023773.1	54742565	AA	AB	AB	AB	AB	AB	AB	AB	AB	BB	ENSOCUG00000016756	54694440	54890018	54742559	54742571	Hnf4a	+	GKYCAAAGTYCA	A/AT	6
CM023773.1	54742565	AA	AB	AB	AB	AB	AB	AB	AB	AB	BB	ENSOCUG00000016756	54694440	54890018	54742563	54742571	Vdr	+		A/AT	2
CM023773.1	69650549	BB	AB	AB	AB	AB	AB	AB	AB	AB	AA	ENSOCUG00000005617	69645599	69661343	69650541	69650551	Esrrg	+	RACAGGAAGT	A/G	8
CM023773.1	69650549	BB	AB	AB	AB	AB	AB	AB	AB	AB	AA	ENSOCUG00000005617	69645599	69661343	69650541	69650553	ERG	+	NRCMGGAARTVN	A/G	8
CM023773.1	69650549	BB	AB	AB	AB	AB	AB	AB	AB	AB	AA	ENSOCUG00000005617	69645599	69661343	69650541	69650553	FLI1	+	RACAGGAAGTRR	A/G	8
CM023773.1	110090118	AA	AB	AB	AB	AB	AB	AB	AB	AB	BB	ENSOCUG00000009100	110089061	110093107	110090107	110090119	TFAP2A	-	GSCCTSAGGSHA	G/A	1
CM023773.1	110090118	AA	AB	AB	AB	AB	AB	AB	AB	AB	BB	ENSOCUG00000009100	110089061	110093107	110090108	110090120	TFAP2A-var.2	-	GSCCTSAGGSHA	G/A	2
CM023773.1	110091574	BB	AB	AB	AB	AB	AB	AB	AB	AB	AA	ENSOCUG00000009100	110089061	110093107	110091569	110091581	BHLHE41	+	NVVCAGCTGCWS	A/G	5
CM023773.1	110091577	BB	AB	AB	AB	AB	AB	AB	AB	AB	AA	ENSOCUG00000009100	110089061	110093107	110091569	110091581	BHLHE41	+	NVVCAGCTGCWS	A/T	8
CM023773.1	141815356	AA	AB	AB	AB	AB	AB	AB	AB	AB	BB	ENSOCUG00000009559	141809713	141870169	141815351	141815363	NR2F1	+	CARAGGTCAAVN	G/A	5
CM023773.1	141998862	AA	AB	AB	AB	AB	AB	AB	AB	AB	BB	ENSOCUG00000007867	141923262	142000382	141998858	141998868	MYC	+	GCCAYGTGSY	G/A	4
CM023775.1	73891904	AA	AB	AB	AB	AB	AB	AB	AB	AB	BB	ENSOCUG00000022219	73888789	73933091	73891901	73891913	MAF::NFE2	-		C/T	9
CM023775.1	73891904	AA	AB	AB	AB	AB	AB	AB	AB	AB	BB	ENSOCUG00000022219	73888789	73933091	73891902	73891917	Bach1::Mafk	-		C/T	13
CM023775.1	73891904	AA	AB	AB	AB	AB	AB	AB	AB	AB	BB	ENSOCUG00000022219	73888789	73933091	73891902	73891914	Nfe2l2	+	NWGMTGASTCAT	C/T	2
CM023775.1	73892844	AA	AB	AB	AB	AB	AB	AB	AB	AB	BB	ENSOCUG00000022219	73888789	73933091	73892835	73892847	BHLHE41	-	NVVCAGCTGCWS	G/A	3
CM023775.1	73922882	BB	AB	AB	AB	AB	AB	AB	AB	AB	AA	ENSOCUG00000022219	73888789	73933091	73922882	73922894	MYCN	-	NNCCACGTGGNN	AC/A	12
CM023776.1	28143718	BB	AB	AB	AB	AB	AB	AB	AB	AB	AA	ENSOCUG00000022245	28134134	28153000	28143713	28143725	ELF3	+	NANCAGGAAGTR	A/G	5
CM023776.1	46763438	BB	AB	AB	AB	AB	AB	AB	AB	AB	AA	ENSOCUG00000016775	46763129	46768392	46763427	46763439	Hnf4a	+	GKYCAAAGTYCA	T/C	11
CM023776.1	46763438	BB	AB	AB	AB	AB	AB	AB	AB	AB	AA	ENSOCUG00000016775	46763129	46768392	46763429	46763439	Esrra	+	NNNMAGGTCA	T/C	9
CM023776.1	46763438	BB	AB	AB	AB	AB	AB	AB	AB	AB	AA	ENSOCUG00000016775	46763129	46768392	46763430	46763442	NR2F1	+	CARAGGTCAAVN	T/C	8
CM023776.1	48822819	BB	AB	AB	AB	AB	AB	AB	AB	AB	AA	ENSOCUG00000012564	48803895	48883317	48822811	48822823	Tcf21	-	NVMCAGCTGSWN	G/T	4
CM023776.1	48822821	BB	AB	AB	AB	AB	AB	AB	AB	AB	AA	ENSOCUG00000012564	48803895	48883317	48822811	48822823	Tcf21	-	NVMCAGCTGSWN	T/C	2
CM023776.1	48824118	AA	AB	AB	AB	AB	AB	AB	AB	AB	BB	ENSOCUG00000012564	48803895	48883317	48824117	48824127	MYBL2	+	WRWGTAAACA	A/G	1
CM023776.1	48827079	AA	AB	AB	AB	AB	AB	AB	AB	AB	BB	ENSOCUG00000012564	48803895	48883317	48827079	48827091	Sox2	-	NNCCATTGTTNN	C/A	12
CM023776.1	48827081	BB	AB	AB	AB	AB	AB	AB	AB	AB	AA	ENSOCUG00000012564	48803895	48883317	48827079	48827091	Sox2	-	NNCCATTGTTNN	A/G	10
CM023776.1	48830873	BB	AB	AB	AB	AB	AB	AB	AB	AB	AA	ENSOCUG00000012564	48803895	48883317	48830865	48830875	MYC	+	GCCAYGTGSY	G/GACATCTT	8
CM023778.1	21593098	AA	AB	AB	AB	AB	AB	AB	AB	AB	BB	ENSOCUG00000008316	21544950	21593973	21593090	21593100	Hand1::Tcf3	-		CTGT/C	2
CM023778.1	21593098	AA	AB	AB	AB	AB	AB	AB	AB	AB	BB	ENSOCUG00000008316	21544950	21593973	21593092	21593102	TCF3	-	RMCAGCTGYT	CTGT/C	4
CM023778.1	21593098	AA	AB	AB	AB	AB	AB	AB	AB	AB	BB	ENSOCUG00000008316	21544950	21593973	21593092	21593102	TAL1::TCF3	-		CTGT/C	4
CM023778.1	21593098	AA	AB	AB	AB	AB	AB	AB	AB	AB	BB	ENSOCUG00000008316	21544950	21593973	21593092	21593102	TCF4	-	TGCABCTGBK	CTGT/C	4
CM023778.1	21593102	AA	AB	AB	AB	AB	AB	AB	AB	AB	BB	ENSOCUG00000008316	21544950	21593973	21593092	21593102	TCF3	-	RMCAGCTGYT	CTGCTCTCGGGAA/C	0
CM023778.1	21593102	AA	AB	AB	AB	AB	AB	AB	AB	AB	BB	ENSOCUG00000008316	21544950	21593973	21593092	21593102	TAL1::TCF3	-	RMCAGCTGYT	CTGCTCTCGGGAA/C	0
CM023778.1	21593102	AA	AB	AB	AB	AB	AB	AB	AB	AB	BB	ENSOCUG00000008316	21544950	21593973	21593092	21593102	TCF4	-	TGCABCTGBK	CTGCTCTCGGGAA/C	0
CM023779.1	106387109	BB	AB	AB	AB	AB	AB	AB	AB	AB	AA	ENSOCUG00000001956	106371773	106419517	106387101	106387113	MYBL1	-	ACCGTTAACSGY	G/A	4
CM023780.1	56450748	AA	AB	AB	AB	AB	AB	AB	AB	AB	BB	ENSOCUG00000000107	56429030	56456456	56450744	56450756	GATA3	-	NNAGATAAGRNN	G/A	8
CM023780.1	56450748	AA	AB	AB	AB	AB	AB	AB	AB	AB	BB	ENSOCUG00000000107	56429030	56456456	56450744	56450756	GATA5	-	NNWGATAASRNN	G/A	8
CM023780.1	56450748	AA	AB	AB	AB	AB	AB	AB	AB	AB	BB	ENSOCUG00000000107	56429030	56456456	56450745	56450755	GATA2	+	NBCTTATCTB	G/A	3
CM023780.1	56450748	AA	AB	AB	AB	AB	AB	AB	AB	AB	BB	ENSOCUG00000000107	56429030	56456456	56450745	56450755	Gata1	+	NTSTTATCTK	G/A	3
CM023780.1	56450748	AA	AB	AB	AB	AB	AB	AB	AB	AB	BB	ENSOCUG00000000107	56429030	56456456	56450746	56450758	Gata4	+	YCTTATCTBHNN	G/A	2
CM023781.1	71227338	BB	AB	AB	AB	AB	AB	AB	AB	AB	AA	ENSOCUG00000026591	71227025	71559995	71227335	71227345	MYC	-	GCCAYGTGSY	G/A	7
CM023781.1	71227484	BB	AB	AB	AB	AB	AB	AB	AB	AB	AA	ENSOCUG00000026591	71227025	71559995	71227483	71227495	NRF1	-	GCGCATGCGCAG	C/T	11
CM023781.1	71243272	BB	AB	AB	AB	AB	AB	AB	AB	AB	AA	ENSOCUG00000026591	71227025	71559995	71243272	71243282	Esrrg	-	RACAGGAAGT	A/G	10
CM023781.1	71243280	BB	AB	AB	AB	AB	AB	AB	AB	AB	AA	ENSOCUG00000026591	71227025	71559995	71243272	71243282	Esrrg	-	RACAGGAAGT	C/CT	2
CM023781.1	71288101	BB	AB	AB	AB	AB	AB	AB	AB	AB	AA	ENSOCUG00000026591	71227025	71559995	71288099	71288111	Sox2	+	NNCCATTGTTNN	T/C	2
CM023781.1	71290529	BB	AB	AB	AB	AB	AB	AB	AB	AB	AA	ENSOCUG00000026591	71227025	71559995	71290527	71290537	TEAD1	-	BACATTCCAR	T/C	8
CM023781.1	71290529	BB	AB	AB	AB	AB	AB	AB	AB	AB	AA	ENSOCUG00000026591	71227025	71559995	71290527	71290537	TEAD4	-	YACATTCCAG	T/C	8
CM023781.1	71290585	AA	AB	AB	AB	AB	AB	AB	AB	AB	BB	ENSOCUG00000026591	71227025	71559995	71290581	71290591	MYC	+	GCCAYGTGSY	G/T	4
CM023781.1	71335565	BB	AB	AB	AB	AB	AB	AB	AB	AB	AA	ENSOCUG00000026591	71227025	71559995	71335558	71335570	HSF1	+	TTCTAGAANNTT	T/C	7
CM023781.1	71335570	AA	AB	AB	AB	AB	AB	AB	AB	AB	BB	ENSOCUG00000026591	71227025	71559995	71335558	71335570	HSF1	+	TTCTAGAANNTT	CT/C	12
CM023781.1	71336443	BB	AB	AB	AB	AB	AB	AB	AB	AB	AA	ENSOCUG00000026591	71227025	71559995	71336431	71336443	Foxa2	-	TGTTTACWYAGB	A/C	0
CM023781.1	71336443	BB	AB	AB	AB	AB	AB	AB	AB	AB	AA	ENSOCUG00000026591	71227025	71559995	71336434	71336446	FOXA1	-	BNNTGTTTACWY	A/C	3
CM023781.1	71336443	BB	AB	AB	AB	AB	AB	AB	AB	AB	AA	ENSOCUG00000026591	71227025	71559995	71336436	71336446	Foxo1	-	NBHTGTTTAC	A/C	3
CM023781.1	71336485	BB	AB	AB	AB	AB	AB	AB	AB	AB	AA	ENSOCUG00000026591	71227025	71559995	71336478	71336490	Foxa2	+	TGTTTACWYAGB	T/C	7
CM023781.1	71388481	BB	AB	AB	AB	AB	AB	AB	AB	AB	AA	ENSOCUG00000026591	71227025	71559995	71388479	71388489	NFIA	-	NBTGCCAANN	C/T	8
CM023783.1	35016207	BB	AB	AB	AB	AB	AB	AB	AB	AB	AA	ENSOCUG00000010550	35014955	35017758	35016204	35016214	TCF4	-	TGCABCTGBK	C/CCCCTG	7
CM023783.1	35016207	BB	AB	AB	AB	AB	AB	AB	AB	AB	AA	ENSOCUG00000010550	35014955	35017758	35016204	35016214	TAL1::TCF3	+	RMCAGCTGYT	C/CCCCTG	3
CM023783.1	35250820	AA	AB	AB	AB	AB	AB	AB	AB	AB	BB	ENSOCUG00000002556	35245823	35252686	35250812	35250824	KLF5	-	DGCCMCRCCCHN	T/A	4
CM023783.1	137526041	BB	AB	AB	AB	AB	AB	AB	AB	AB	AA	ENSOCUG00000002119	137507515	137607525	137526034	137526046	SPI1	+	DAAAGAGGAAGT	GA/G	7
CM023784.1	113116649	AA	AB	AB	AB	AB	AB	AB	AB	AB	BB	ENSOCUG00000015382	113115018	113133790	113116649	113116661	FOXA1	-	BNNTGTTTACWY	G/A	12
CM023784.1	113127583	AA	AB	AB	AB	AB	AB	AB	AB	AB	BB	ENSOCUG00000015382	113115018	113133790	113127576	113127586	POU5F1B	-	TATGCATATR	C/T	3
CM023784.1	113127586	AA	AB	AB	AB	AB	AB	AB	AB	AB	BB	ENSOCUG00000015382	113115018	113133790	113127576	113127586	POU5F1B	-	TATGCATATR	A/G	0
CM023784.1	113132684	BB	AB	AB	AB	AB	AB	AB	AB	AB	AA	ENSOCUG00000015382	113115018	113133790	113132680	113132692	CEBPB	-	DATTATGCAATM	C/T	8
CM023784.1	113132686	BB	AB	AB	AB	AB	AB	AB	AB	AB	AA	ENSOCUG00000015382	113115018	113133790	113132680	113132692	CEBPB	-	DATTATGCAATM	C/T	6
CM023784.1	128424604	AA	AB	AB	AB	AB	AB	AB	AB	AB	BB	ENSOCUG00000002342	128422618	128436889	128424596	128424608	CEBPB	-	DATTATGCAATM	C/G	4
CM023784.1	128424604	AA	AB	AB	AB	AB	AB	AB	AB	AB	BB	ENSOCUG00000002342	128422618	128436889	128424597	128424607	CEBPA	+	ATTGCAYAAY	C/G	7
CM023784.1	128424842	BB	AB	AB	AB	AB	AB	AB	AB	AB	AA	ENSOCUG00000002342	128422618	128436889	128424842	128424854	MAX	-	NAMCACGTGBYN	TG/T	12
CM023784.1	141541079	AA	AB	AB	AB	AB	AB	AB	AB	AB	BB	ENSOCUG00000029014	141520876	141563155	141541067	141541079	ELF1	+	NWHCMGGAAGTN	T/C	12
CM023784.1	141541079	AA	AB	AB	AB	AB	AB	AB	AB	AB	BB	ENSOCUG00000029014	141520876	141563155	141541068	141541080	ERG	+	NRCMGGAARTVN	T/C	11
CM023784.1	141541079	AA	AB	AB	AB	AB	AB	AB	AB	AB	BB	ENSOCUG00000029014	141520876	141563155	141541070	141541080	Gabpa	+	CAGGAAGTRV	T/C	9
CM023784.1	141541658	BB	AB	AB	AB	AB	AB	AB	AB	AB	AA	ENSOCUG00000029014	141520876	141563155	141541652	141541664	RUNX1	+	NNWTGTGGTTWN	T/C	6
CM023784.1	141541658	BB	AB	AB	AB	AB	AB	AB	AB	AB	AA	ENSOCUG00000029014	141520876	141563155	141541653	141541663	RUNX3	-	WAACCACARV	T/C	5
CM023784.1	158289101	AA	AB	AB	AB	AB	AB	AB	AB	AB	BB	ENSOCUG00000023110	158280277	158313278	158289089	158289101	SPI1	+	DAAAGAGGAAGT	T/C	12
CM023784.1	158293753	AA	AB	AB	AB	AB	AB	AB	AB	AB	BB	ENSOCUG00000023110	158280277	158313278	158293747	158293759	FOXA1	+	BNNTGTTTACWY	A/G	6
CM023785.1	33971248	AA	AB	AB	AB	AB	AB	AB	AB	AB	BB	ENSOCUG00000009724	33956055	33972655	33971240	33971252	Ar	-	GWACABNNTGTN	C/A	4
CM023785.1	110000498	BB	AB	AB	AB	AB	AB	AB	AB	AB	AA	ENSOCUG00000010818	109985357	110044384	110000489	110000501	NR3C2	-	GAACANNNWGTN	G/A	3
CM023786.1	29782760	BB	AB	AB	AB	AB	AB	AB	AB	AB	AA	ENSOCUG00000003388	29774561	29842495	29782751	29782763	Pou5f1::Sox2	-		T/C	3
CM023786.1	29836650	BB	AB	AB	AB	AB	AB	AB	AB	AB	AA	ENSOCUG00000003388	29774561	29842495	29836641	29836651	Esrrg	+	RACAGGAAGT	G/A	9
CM023786.1	29836650	BB	AB	AB	AB	AB	AB	AB	AB	AB	AA	ENSOCUG00000003388	29774561	29842495	29836642	29836652	ETV6	+	ASAGGAAGTG	G/A	8
CM023786.1	29836650	BB	AB	AB	AB	AB	AB	AB	AB	AB	AA	ENSOCUG00000003388	29774561	29842495	29836642	29836652	ETV3	+	ACCGGAAGTG	G/A	8
CM023786.1	29836702	BB	AB	AB	AB	AB	AB	AB	AB	AB	AA	ENSOCUG00000003388	29774561	29842495	29836700	29836710	Esrrg	-	RACAGGAAGT	A/G	8
CM023786.1	29836702	BB	AB	AB	AB	AB	AB	AB	AB	AB	AA	ENSOCUG00000003388	29774561	29842495	29836702	29836714	Mafb	+	WAWNTGCTGACT	A/G	0
CM023786.1	35298607	BB	AB	AB	AB	AB	AB	AB	AB	AB	AA	ENSOCUG00000010456	35294240	35683252	35298598	35298610	SPI1	-	DAAAGAGGAAGT	G/A	3
CM023786.1	35323834	AA	AB	AB	AB	AB	AB	AB	AB	AB	BB	ENSOCUG00000010456	35294240	35683252	35323834	35323846	BHLHE41	-	NVVCAGCTGCWS	A/G	12
CM023786.1	35323979	AA	AB	AB	AB	AB	AB	AB	AB	AB	BB	ENSOCUG00000010456	35294240	35683252	35323969	35323988	MAFK	+		T/C	10
CM023786.1	35323979	AA	AB	AB	AB	AB	AB	AB	AB	AB	BB	ENSOCUG00000010456	35294240	35683252	35323977	35323989	Mafb	-	WAWNTGCTGACT	T/C	10
CM023786.1	35330043	BB	AB	AB	AB	AB	AB	AB	AB	AB	AA	ENSOCUG00000010456	35294240	35683252	35330037	35330049	Foxa2	-	TGTTTACWYAGB	G/A	6
CM023786.1	35330043	BB	AB	AB	AB	AB	AB	AB	AB	AB	AA	ENSOCUG00000010456	35294240	35683252	35330040	35330052	FOXA1	-	BNNTGTTTACWY	G/A	9
CM023786.1	35337029	AA	AB	AB	AB	AB	AB	AB	AB	AB	BB	ENSOCUG00000010456	35294240	35683252	35337028	35337040	NR3C2	+	GAACANNNWGTN	T/G	1
CM023786.1	35337029	AA	AB	AB	AB	AB	AB	AB	AB	AB	BB	ENSOCUG00000010456	35294240	35683252	35337028	35337040	Ar	+	GWACABNNTGTN	T/G	1
CM023786.1	35361483	AA	AB	AB	AB	AB	AB	AB	AB	AB	BB	ENSOCUG00000010456	35294240	35683252	35361477	35361489	BHLHE40	-	NVKCACGTGMCN	C/T	6
CM023786.1	35361483	AA	AB	AB	AB	AB	AB	AB	AB	AB	BB	ENSOCUG00000010456	35294240	35683252	35361478	35361488	USF1	+	RYCACGTGAC	C/T	5
CM023786.1	35361483	AA	AB	AB	AB	AB	AB	AB	AB	AB	BB	ENSOCUG00000010456	35294240	35683252	35361480	35361488	USF2	-	GTCACGTG	C/T	5
CM023786.1	35362005	AA	AB	AB	AB	AB	AB	AB	AB	AB	BB	ENSOCUG00000010456	35294240	35683252	35361996	35362008	BHLHE40	+	NVKCACGTGMCN	G/A	9
CM023786.1	35365686	AA	AB	AB	AB	AB	AB	AB	AB	AB	BB	ENSOCUG00000010456	35294240	35683252	35365676	35365688	BATF::JUN	+		A/G	10
CM023786.1	35365687	AA	AB	AB	AB	AB	AB	AB	AB	AB	BB	ENSOCUG00000010456	35294240	35683252	35365676	35365688	BATF::JUN	+		A/C	11
CM023786.1	35407586	BB	AB	AB	AB	AB	AB	AB	AB	AB	AA	ENSOCUG00000010456	35294240	35683252	35407577	35407589	ERG	-	NRCMGGAARTVN	C/T	3
CM023786.1	35407586	BB	AB	AB	AB	AB	AB	AB	AB	AB	AA	ENSOCUG00000010456	35294240	35683252	35407579	35407589	Esrrg	-	RACAGGAAGT	C/T	3
CM023786.1	35407586	BB	AB	AB	AB	AB	AB	AB	AB	AB	AA	ENSOCUG00000010456	35294240	35683252	35407582	35407594	FOXA1	+	BNNTGTTTACWY	C/T	4
CM023786.1	35407586	BB	AB	AB	AB	AB	AB	AB	AB	AB	AA	ENSOCUG00000010456	35294240	35683252	35407585	35407597	Foxa2	+	TGTTTACWYAGB	C/T	1
CM023786.1	35407587	AA	AB	AB	AB	AB	AB	AB	AB	AB	BB	ENSOCUG00000010456	35294240	35683252	35407577	35407589	ERG	-	NRCMGGAARTVN	G/A	2
CM023786.1	35407587	AA	AB	AB	AB	AB	AB	AB	AB	AB	BB	ENSOCUG00000010456	35294240	35683252	35407579	35407589	Esrrg	-	RACAGGAAGT	G/A	2
CM023786.1	35407587	AA	AB	AB	AB	AB	AB	AB	AB	AB	BB	ENSOCUG00000010456	35294240	35683252	35407582	35407594	FOXA1	+	BNNTGTTTACWY	G/A	5
CM023786.1	35407587	AA	AB	AB	AB	AB	AB	AB	AB	AB	BB	ENSOCUG00000010456	35294240	35683252	35407585	35407597	Foxa2	+	TGTTTACWYAGB	G/A	2
CM023786.1	35444239	BB	AB	AB	AB	AB	AB	AB	AB	AB	AA	ENSOCUG00000010456	35294240	35683252	35444234	35444244	POU5F1B	-	TATGCATATR	T/A	5
CM023786.1	35500523	BB	AB	AB	AB	AB	AB	AB	AB	AB	AA	ENSOCUG00000010456	35294240	35683252	35500517	35500527	USF1	+	RYCACGTGAC	G/A	6
CM023786.1	35505132	AA	AB	AB	AB	AB	AB	AB	AB	AB	BB	ENSOCUG00000010456	35294240	35683252	35505128	35505138	TBX1	+	ACACNTAGGTGT	T/TGTTGGC	4
CM023786.1	35676752	BB	AB	AB	AB	AB	AB	AB	AB	AB	AA	ENSOCUG00000010456	35294240	35683252	35676742	35676752	GATA2	-	NBCTTATCTB	C/T	0
CM023786.1	53824272	BB	AB	AB	AB	AB	AB	AB	AB	AB	AA	ENSOCUG00000004263	53820624	53835065	53824260	53824272	Hnf4a	+	GKYCAAAGTYCA	G/A	12
CM023787.1	70009097	AA	AB	AB	AB	AB	AB	AB	AB	AB	BB	ENSOCUG00000000984	69956277	70299176	70009097	70009109	Foxa2	-	TGTTTACWYAGB	T/C	12
CM023787.1	70102928	AA	AB	AB	AB	AB	AB	AB	AB	AB	BB	ENSOCUG00000000984	69956277	70299176	70102919	70102931	Sox2	-	NNCCATTGTTNN	C/T	3
CM023787.1	70135792	AA	AB	AB	AB	AB	AB	AB	AB	AB	BB	ENSOCUG00000000984	69956277	70299176	70135791	70135803	FOXA1	+	BNNTGTTTACWY	T/C	1
CM023787.1	70162709	AA	AB	AB	AB	AB	AB	AB	AB	AB	BB	ENSOCUG00000000984	69956277	70299176	70162702	70162712	NEUROD1	-	RRCAGATGGY	C/T	3
CM023789.1	24866750	BB	AB	AB	AB	AB	AB	AB	AB	AB	AA	ENSOCUG00000016171	24825282	25142912	24866743	24866753	PAX5	-	WGCRTGACYM	C/A	3
CM023789.1	24867061	AA	AB	AB	AB	AB	AB	AB	AB	AB	BB	ENSOCUG00000016171	24825282	25142912	24867061	24867071	SRF	-	CCWTATAWGG	G/A	10
CM023789.1	24867442	BB	AB	AB	AB	AB	AB	AB	AB	AB	AA	ENSOCUG00000016171	24825282	25142912	24867442	24867452	MYC	-	GCCAYGTGSY	A/G	10
CM023789.1	24868066	BB	AB	AB	AB	AB	AB	AB	AB	AB	AA	ENSOCUG00000016171	24825282	25142912	24868065	24868073	PDX1	+		G/A	1
CM023789.1	24868088	BB	AB	AB	AB	AB	AB	AB	AB	AB	AA	ENSOCUG00000016171	24825282	25142912	24868077	24868089	Foxa2	+	TGTTTACWYAGB	G/A	11
CM023789.1	24868100	BB	AB	AB	AB	AB	AB	AB	AB	AB	AA	ENSOCUG00000016171	24825282	25142912	24868098	24868108	TCF3	+	RMCAGCTGYT	A/G	2
CM023789.1	24868100	BB	AB	AB	AB	AB	AB	AB	AB	AB	AA	ENSOCUG00000016171	24825282	25142912	24868098	24868108	TAL1::TCF3	+		A/G	2
CM023789.1	24868504	AA	AB	AB	AB	AB	AB	AB	AB	AB	BB	ENSOCUG00000016171	24825282	25142912	24868499	24868507	KLF4	-	CCCRCCCT	C/T	3
CM023789.1	24872470	BB	AB	AB	AB	AB	AB	AB	AB	AB	AA	ENSOCUG00000016171	24825282	25142912	24872459	24872471	TFAP2C	+	KSCCTSRGGSMA	C/T	11
CM023789.1	24887419	AA	AB	AB	AB	AB	AB	AB	AB	AB	BB	ENSOCUG00000016171	24825282	25142912	24887418	24887428	Klf1	-		T/TTG	9
CM023789.1	24889980	BB	AB	AB	AB	AB	AB	AB	AB	AB	AA	ENSOCUG00000016171	24825282	25142912	24889975	24889987	Hnf4a	-	GKYCAAAGTYCA	C/G	7
CM023789.1	24889990	AA	AB	AB	AB	AB	AB	AB	AB	AB	BB	ENSOCUG00000016171	24825282	25142912	24889985	24889997	NR2F1	-	CARAGGTCAAVN	G/A	7
CM023789.1	24889990	AA	AB	AB	AB	AB	AB	AB	AB	AB	BB	ENSOCUG00000016171	24825282	25142912	24889988	24889998	Esrra	-	NNNMAGGTCA	G/A	8
CM023789.1	24892173	AA	AB	AB	AB	AB	AB	AB	AB	AB	BB	ENSOCUG00000016171	24825282	25142912	24892166	24892178	MEF2B	-	KCYAAAAATAGM	C/T	5
CM023789.1	24894219	AA	AB	AB	AB	AB	AB	AB	AB	AB	BB	ENSOCUG00000016171	24825282	25142912	24894216	24894228	SPI1	-	DAAAGAGGAAGT	T/A	9
CM023789.1	24897983	BB	AB	AB	AB	AB	AB	AB	AB	AB	AA	ENSOCUG00000016171	24825282	25142912	24897971	24897983	NFKB1	+	NGGGGAATTCCC	C/T	12
CM023789.1	24897983	BB	AB	AB	AB	AB	AB	AB	AB	AB	AA	ENSOCUG00000016171	24825282	25142912	24897973	24897983	REL	+	GGGRAWTTCC	C/T	10
CM023789.1	24897983	BB	AB	AB	AB	AB	AB	AB	AB	AB	AA	ENSOCUG00000016171	24825282	25142912	24897973	24897983	RELA	+	GGGRAWTTCC	C/T	10
CM023789.1	24897983	BB	AB	AB	AB	AB	AB	AB	AB	AB	AA	ENSOCUG00000016171	24825282	25142912	24897975	24897987	ERG	-	NRCMGGAARTVN	C/T	4
CM023789.1	24897983	BB	AB	AB	AB	AB	AB	AB	AB	AB	AA	ENSOCUG00000016171	24825282	25142912	24897976	24897986	ELK1	-	NCCGGAAGTR	C/T	3
CM023789.1	24899313	BB	AB	AB	AB	AB	AB	AB	AB	AB	AA	ENSOCUG00000016171	24825282	25142912	24899308	24899320	Bcl6	+	TTCCTAGAAAGC	C/T	5
CM023789.1	24900334	AA	AB	AB	AB	AB	AB	AB	AB	AB	BB	ENSOCUG00000016171	24825282	25142912	24900333	24900343	Esrra	-	NNNMAGGTCA	C/T	9
CM023789.1	24936881	AA	AB	AB	AB	AB	AB	AB	AB	AB	BB	ENSOCUG00000016171	24825282	25142912	24936876	24936888	TP63	+	AWGTTSAGACAT	G/T	5
CM023789.1	24943781	BB	AB	AB	AB	AB	AB	AB	AB	AB	AA	ENSOCUG00000016171	24825282	25142912	24943774	24943786	EBF1	-	TTCCCMAGGGAC	A/G	5
CM023789.1	24956292	AA	AB	AB	AB	AB	AB	AB	AB	AB	BB	ENSOCUG00000016171	24825282	25142912	24956280	24956292	Dux	-	AYCYAATCANNN	C/T	0
CM023789.1	24956292	AA	AB	AB	AB	AB	AB	AB	AB	AB	BB	ENSOCUG00000016171	24825282	25142912	24956282	24956294	DUX4	-	TAAHCYAATCAD	C/T	2
CM023789.1	24964370	AA	AB	AB	AB	AB	AB	AB	AB	AB	BB	ENSOCUG00000016171	24825282	25142912	24964365	24964375	PBX1	-	NATGAVTCAT	C/T	5
CM023789.1	24987050	AA	AB	AB	AB	AB	AB	AB	AB	AB	BB	ENSOCUG00000016171	24825282	25142912	24987044	24987056	NR2F1	+	CARAGGTCAAVN	G/T	6
CM023789.1	24994328	BB	AB	AB	AB	AB	AB	AB	AB	AB	AA	ENSOCUG00000016171	24825282	25142912	24994326	24994336	Gata1	+	NTSTTATCTK	T/A	2
CM023789.1	24994328	BB	AB	AB	AB	AB	AB	AB	AB	AB	AA	ENSOCUG00000016171	24825282	25142912	24994326	24994336	GATA2	+	NBCTTATCTB	T/A	2
CM023789.1	25001279	AA	AB	AB	AB	AB	AB	AB	AB	AB	BB	ENSOCUG00000016171	24825282	25142912	25001267	25001279	Tcf7	+	NDASATCAAAGG	T/C	12
CM023789.1	25001279	AA	AB	AB	AB	AB	AB	AB	AB	AB	BB	ENSOCUG00000016171	24825282	25142912	25001268	25001280	TCF7L2	+	RASATCAAAGGV	T/C	11
CM023789.1	25083855	BB	AB	AB	AB	AB	AB	AB	AB	AB	AA	ENSOCUG00000016171	24825282	25142912	25083849	25083861	MYCN	-	NNCCACGTGGNN	T/C	6
CM023789.1	25083855	BB	AB	AB	AB	AB	AB	AB	AB	AB	AA	ENSOCUG00000016171	24825282	25142912	25083850	25083860	MYC	-	GCCAYGTGSY	T/C	5
CM023789.1	26646374	AA	AB	AB	AB	AB	AB	AB	AB	AB	BB	ENSOCUG00000013992	26628948	26673410	26646363	26646375	NR3C2	+	GAACANNNWGTN	T/C	11
CM023789.1	26666576	AA	AB	AB	AB	AB	AB	AB	AB	AB	BB	ENSOCUG00000013992	26628948	26673410	26666570	26666582	CDX2	-	RDGYMATAAAAN	TTTG/T	6
CM023789.1	26668514	BB	AB	AB	AB	AB	AB	AB	AB	AB	AA	ENSOCUG00000013992	26628948	26673410	26668508	26668518	Gata1	+	NTSTTATCTK	G/A	6
CM023789.1	51898601	AA	AB	AB	AB	AB	AB	AB	AB	AB	BB	ENSOCUG00000001816	51780144	52117306	51898601	51898613	Gata4	+	YCTTATCTBHNN	G/T	0
CM023789.1	51907447	AA	AB	AB	AB	AB	AB	AB	AB	AB	BB	ENSOCUG00000001816	51780144	52117306	51907445	51907455	SOX9	+	CCATTGKYYN	C/T	2

## Sheet: H_M OR M_L
CHROM	POS	mother_GT	child_1_GT	child_2_GT	child_3_GT	child_4_GT	child_5_GT	child_6_GT	child_7_GT	child_8_GT	father_GT	ENSEMBL ID	gene_start	gene_end	TFBS_start	TFBS_end	TF	strand	consensus_sequence	VAR_GT	VAR_POS_in_consensus
CM023773.1	115376347	AB	AB	AA	AA	AA	AB	AA	AB	AA	AA	ENSOCUG00000016960	115375937	115381969	115376340	115376358	GATA1::TAL1	-		C/T	11
CM023773.1	115377408	AB	AB	AA	AA	AA	AB	AA	AB	AA	AA	ENSOCUG00000016960	115375937	115381969	115377401	115377411	ZNF263	+	RGGAGGASBA	T/A	7

## Sheet: M_M
mother	child_1	child_2	child_3	child_4	child_5	child_6	child_7	child_8	father	gene_id	gene_start	gene_end	TFBS_start	TFBS_end	TF	strand	CHROM	POS	consensus_sequence	VAR_GT	VAR_POS_in_consensus
