# Supplementary material for: Family-based Analysis of Allele-Specific Expression Reveals Mostly Simple, Intermediate-type of Inheritance
Source: Research Square preprint supplement (doi:10.21203/rs.3.rs-6515696/v1), 2025-06-05
Supplement: Supplementary file 3 [file 3cefb6bfc50a6559bf1d04c2.xlsx]

## Sheet: H_L
		mother			child_1			child_2			child_3			child_4			child_5			child_6			child_7			child_8			father
ENSEBL ID	gene_name	ASE Prediction	norm_counts	log2fc	ASE Prediction	norm_counts	log2fc	ASE Prediction	norm_counts	log2fc	ASE Prediction	norm_counts	log2fc	ASE Prediction	norm_counts	log2fc	ASE Prediction	norm_counts	log2fc	ASE Prediction	norm_counts	log2fc	ASE Prediction	norm_counts	log2fc	ASE Prediction	norm_counts	log2fc	ASE Prediction	norm_counts	log2fc
ENSOCUG00000000098	SLC16A10	H	507.34	1.4	M	347.36	0.8	M	286.84	0.6	M	373.13	0.9	M	371.15	0.9	M	244.59	0.3	M	319.37	0.7	M	285.62	0.6	M	364.18	0.9	L	194.84	0
ENSOCUG00000000148	CDO1	H	32.99	2.9	M	11.35	1.4	M	23.24	2.4	M	14.65	1.7	M	11.37	1.4	M	15.99	1.9	M	9.62	1.1	M	11.02	1.3	M	9.73	1.1	L	4.55	0
ENSOCUG00000000302	ENSOCUG00000000302	H	57.43	1.2	M	54.94	1.2	M	46.88	0.9	M	58.13	1.3	M	56.44	1.2	M	63.89	1.4	M	35.9	0.6	M	58.44	1.3	M	49.57	1.0	L	24.09	0
ENSOCUG00000000485	NAF1	H	175.93	1.2	M	130.91	0.7	M	82.94	0.1	M	121.24	0.6	M	115.75	0.5	M	110.49	0.5	M	161.78	1.0	M	87.98	0.2	M	82.75	0.1	L	78.9	0
ENSOCUG00000000716	EPSTI1	H	21.1	2.4	M	18.11	2.2	M	13.04	1.7	M	9.33	1.3	M	7.51	0.9	M	13.01	1.7	M	8.6	1.1	M	15.78	1.9	M	10.81	1.4	L	4.2	0
ENSOCUG00000000725	MC5R	H	12.26	5.2	M	4.06	3.6	M	10.17	5.0	M	5.03	3.9	M	1.17	1.8	M	8.58	4.7	M	2.44	2.8	M	0.61	0.6	M	1.64	2.2	L	0.23	0
ENSOCUG00000001131	CEMIP2	H	127.63	2.0	M	57.84	0.8	M	63.12	1.0	M	62.44	0.9	M	65.95	1.0	M	48.23	0.5	M	66.3	1.0	M	50.71	0.6	M	131.39	2.0	L	32.72	0
ENSOCUG00000001428	PDE4A	H	2068.27	1.5	M	1332.81	0.9	M	1032.52	0.5	M	1299.49	0.8	M	1065.07	0.5	M	1156.59	0.7	M	1209.95	0.7	M	1103.01	0.6	M	1102.15	0.6	L	728.55	0
ENSOCUG00000001519	RTN4RL1	H	74.71	2.0	M	51.39	1.5	M	60.31	1.7	M	87.01	2.2	M	34.27	0.9	M	54.67	1.6	M	45.58	1.3	M	57.73	1.6	M	45.09	1.3	L	18.59	0
ENSOCUG00000002662	ENSOCUG00000002662	H	312.44	1.1	M	154.83	0.1	M	207.49	0.5	M	185.7	0.4	M	162.7	0.2	M	161.36	0.2	M	195.7	0.5	M	138.64	-0.0	M	168.45	0.2	L	142.86	0
ENSOCUG00000002754	ABCC3	H	51.42	3.6	M	15.51	1.8	M	29.48	2.8	M	23.78	2.5	M	27.3	2.6	M	40.68	3.2	M	20.48	2.3	M	20.98	2.3	M	23.91	2.5	L	4.72	0
ENSOCUG00000003048	TPPP	H	88.37	1.1	M	61.76	0.6	M	77.1	0.9	M	64.42	0.7	M	76.63	0.9	M	66.02	0.7	M	48.54	0.3	M	79.19	1.0	M	77.7	0.9	L	41.17	0
ENSOCUG00000003314	MPP3	H	8.16	1.8	M	7.48	1.6	M	8.46	1.8	M	6.85	1.5	M	8.59	1.8	M	9.19	1.9	M	6.34	1.4	M	8.03	1.7	M	7.73	1.7	L	2.42	0
ENSOCUG00000004501	ENSOCUG00000004501	H	26.82	1.6	M	15.82	0.9	M	13.23	0.6	M	12.33	0.5	M	11.17	0.3	M	14.08	0.7	M	8.06	-0.2	M	14.15	0.7	M	16.89	1.0	L	8.9	0
ENSOCUG00000004534	MDN1	H	694.38	1.6	M	238.93	0.0	M	244.18	0.0	M	266.19	0.2	M	308.49	0.4	M	226.84	-0.1	M	249.32	0.1	M	292.16	0.3	M	256.56	0.1	L	236.15	0
ENSOCUG00000004580	POLA2	H	170.34	1.1	M	88.64	0.2	M	85.12	0.1	M	86.56	0.1	M	91.81	0.2	M	88.0	0.2	M	93.52	0.2	M	98.79	0.3	M	68.92	-0.2	L	79.31	0
ENSOCUG00000004682	RAB15	H	14.19	1.5	M	12.64	1.4	M	7.58	0.7	M	6.66	0.5	M	11.16	1.2	M	10.47	1.1	M	12.95	1.4	M	9.81	1.0	M	6.94	0.5	L	4.98	0
ENSOCUG00000004855	XYLT1	H	141.97	1.4	M	122.25	1.2	M	113.8	1.1	M	137.03	1.3	M	120.07	1.1	M	97.34	0.8	M	137.65	1.3	M	105.56	1.0	M	152.52	1.5	L	53.81	0
ENSOCUG00000005174	DPT	H	622.26	1.2	M	471.46	0.8	M	484.01	0.8	M	409.26	0.6	M	342.54	0.3	M	464.08	0.8	M	318.6	0.2	M	274.98	0.0	M	418.28	0.6	L	270.61	0
ENSOCUG00000005330	ACADSB	H	798.26	1.3	M	544.9	0.7	M	556.47	0.8	M	458.81	0.5	M	575.48	0.8	M	524.42	0.7	M	495.09	0.6	M	542.51	0.7	M	487.55	0.6	L	327.45	0
ENSOCUG00000005343	TTC5	H	33.13	2.4	M	28.84	2.2	M	14.9	1.2	M	10.52	0.7	M	32.01	2.3	M	16.94	1.4	M	33.42	2.4	M	28.86	2.2	M	12.25	1.0	L	6.37	0
ENSOCUG00000005614	TTC9	H	135.99	1.5	M	86.69	0.8	M	80.53	0.7	M	73.77	0.6	M	131.44	1.4	M	79.18	0.7	M	69.56	0.5	M	108.58	1.2	M	89.88	0.9	L	48.73	0
ENSOCUG00000006382	ZCCHC24	H	940.05	1.2	M	588.4	0.5	M	461.59	0.2	M	539.5	0.4	M	535.88	0.4	M	403.89	-0.0	M	685.79	0.7	M	450.04	0.1	M	526.92	0.4	L	410.98	0
ENSOCUG00000007027	TSSK1B	H	10.29	1.7	M	6.35	1.0	M	7.51	1.2	M	8.72	1.4	M	8.8	1.4	M	4.8	0.6	M	7.63	1.2	M	7.66	1.2	M	8.96	1.5	L	3.28	0
ENSOCUG00000007492	LMOD1	H	1720.58	4.2	M	1157.71	3.6	M	462.47	2.3	M	448.91	2.2	M	512.33	2.4	M	660.92	2.8	M	565.46	2.6	M	502.31	2.4	M	735.24	3.0	L	94.9	0
ENSOCUG00000007765	PSAT1	H	21.23	3.1	M	15.53	2.7	M	21.26	3.1	M	8.63	1.8	M	11.2	2.2	M	11.36	2.2	M	4.79	0.9	M	12.06	2.3	M	4.25	0.8	L	2.51	0
ENSOCUG00000008001	SLC38A5	H	19.63	1.6	M	12.09	0.9	M	18.86	1.5	M	14.08	1.1	M	9.31	0.5	M	15.09	1.2	M	14.98	1.2	M	12.15	0.9	M	12.51	0.9	L	6.49	0
ENSOCUG00000009088	ENSOCUG00000009088	H	32.79	1.4	M	21.61	0.8	M	21.15	0.8	M	12.17	-0.0	M	15.85	0.4	M	17.27	0.5	M	20.18	0.7	M	16.16	0.4	M	17.5	0.5	L	11.97	0
ENSOCUG00000009095	COMTD1	H	134.97	1.2	M	55.57	-0.0	M	56.29	-0.0	M	47.72	-0.2	M	67.42	0.2	M	85.17	0.6	M	107.54	0.9	M	58.56	0.0	M	77.63	0.4	L	57.29	0
ENSOCUG00000009172	IRX2	H	12.77	4.5	M	3.81	2.8	M	2.78	2.2	M	3.6	2.6	M	1.95	1.8	M	1.13	1.1	M	3.13	2.6	M	2.32	2.1	M	3.21	2.5	L	0.64	0
ENSOCUG00000009379	MIS18A	H	9.86	3.6	M	1.98	1.3	M	4.63	2.5	M	2.8	1.7	M	4.21	2.3	M	7.91	3.3	M	6.3	3.0	M	8.06	3.4	M	4.86	2.6	L	0.88	0
ENSOCUG00000009473	PANX1	H	193.34	2.4	M	112.37	1.6	M	88.53	1.3	M	106.36	1.6	M	98.5	1.4	M	101.21	1.5	M	182.11	2.3	M	131.86	1.9	M	117.8	1.7	L	35.94	0
ENSOCUG00000009547	MYO5B	H	364.15	1.8	M	142.21	0.5	M	165.94	0.7	M	186.84	0.8	M	149.09	0.5	M	115.5	0.2	M	139.76	0.4	M	153.65	0.6	M	127.5	0.3	L	103.62	0
ENSOCUG00000009676	ENSOCUG00000009676	H	30.42	5.8	M	17.4	5.0	M	19.81	5.2	M	18.55	5.1	M	16.06	4.9	M	19.22	5.2	M	17.09	5.0	M	15.96	4.9	M	14.57	4.8	L	0.62	0
ENSOCUG00000009962	OTOP2	H	96.03	5.3	M	82.36	5.0	M	32.75	3.7	M	59.76	4.6	M	57.66	4.5	M	92.97	5.2	M	46.89	4.2	M	37.68	3.9	M	33.02	3.7	L	2.57	0
ENSOCUG00000010531	KCTD15	H	1110.21	1.2	M	1124.35	1.2	M	881.08	0.8	M	1062.59	1.1	M	1066.4	1.1	M	910.98	0.9	M	882.74	0.8	M	993.32	1.0	M	1219.74	1.3	L	490.79	0
ENSOCUG00000010546	ENSOCUG00000010546	H	1774.4	1.9	M	772.57	0.7	M	639.09	0.4	M	679.38	0.5	M	720.23	0.6	M	748.93	0.6	M	846.78	0.8	M	798.27	0.7	M	816.18	0.8	L	482.58	0
ENSOCUG00000010747	ZNF385A	H	409.73	5.1	M	366.64	4.9	M	158.87	3.7	M	71.69	2.6	M	34.01	1.5	M	171.21	3.8	M	151.46	3.7	M	36.67	1.6	M	35.14	1.5	L	12.03	0
ENSOCUG00000010891	ENSOCUG00000010891	H	583.2	1.6	M	241.75	0.4	M	212.0	0.2	M	226.14	0.3	M	239.74	0.4	M	198.45	0.1	M	285.87	0.6	M	223.59	0.3	M	243.83	0.4	L	187.51	0
ENSOCUG00000011085	CTSS	H	46.91	1.4	M	30.38	0.7	M	32.27	0.8	M	25.23	0.5	M	24.16	0.4	M	23.77	0.4	M	22.26	0.3	M	27.7	0.6	M	29.33	0.7	L	18.1	0
ENSOCUG00000011452	ENSOCUG00000011452	H	28.85	1.5	M	17.11	0.8	M	31.93	1.7	M	29.39	1.6	M	19.66	1.0	M	24.89	1.3	M	31.46	1.7	M	17.51	0.8	M	19.97	1.0	L	9.99	0
ENSOCUG00000012115	AXIN2	H	335.85	1.2	M	170.71	0.2	M	203.89	0.4	M	273.07	0.8	M	242.12	0.7	M	241.17	0.7	M	307.88	1.0	M	169.77	0.2	M	188.23	0.3	L	151.44	0
ENSOCUG00000012326	IL18BP	H	91.01	1.1	M	57.35	0.4	M	44.99	0.1	M	47.07	0.1	M	38.69	-0.1	M	44.89	0.1	M	48.71	0.2	M	52.89	0.3	M	39.76	-0.1	L	42.09	0
ENSOCUG00000013194	PPARG	H	28.28	2.2	M	14.57	1.3	M	25.83	2.1	M	16.37	1.5	M	9.94	0.7	M	13.11	1.1	M	10.86	0.8	M	13.86	1.2	M	12.31	1.1	L	5.98	0
ENSOCUG00000013675	FGL2	H	103.54	1.5	M	71.67	1.0	M	96.35	1.4	M	72.61	1.0	M	64.97	0.8	M	88.92	1.3	M	69.49	0.9	M	73.1	1.0	M	79.5	1.1	L	36.53	0
ENSOCUG00000013715	C5orf34	H	41.36	1.4	M	15.79	0.0	M	25.02	0.7	M	20.73	0.5	M	19.77	0.3	M	30.76	1.0	M	29.02	0.9	M	20.06	0.3	M	22.33	0.5	L	15.32	0
ENSOCUG00000013971	AOX1	H	236.66	1.1	M	118.77	0.1	M	111.22	0.0	M	111.14	0.1	M	116.06	0.1	M	118.67	0.1	M	183.34	0.8	M	103.49	-0.1	M	130.66	0.3	L	108.03	0
ENSOCUG00000014237	GK5	H	20.31	1.9	M	13.78	1.4	M	13.48	1.3	M	16.68	1.7	M	15.34	1.5	M	15.0	1.5	M	12.08	1.1	M	14.58	1.4	M	17.41	1.7	L	5.23	0
ENSOCUG00000014468	C1S	H	284.03	1.3	M	194.64	0.7	M	293.14	1.3	M	205.38	0.8	M	226.85	1.0	M	223.83	0.9	M	214.48	0.9	M	187.54	0.7	M	239.63	1.0	L	117.01	0
ENSOCUG00000014480	C1R	H	378.62	1.4	M	195.44	0.4	M	200.97	0.5	M	233.75	0.7	M	154.1	0.1	M	225.56	0.6	M	227.9	0.6	M	123.21	-0.2	M	130.17	-0.2	L	145.57	0
ENSOCUG00000015331	GPRC5D	H	16.11	6.3	M	13.01	6.0	M	7.51	5.2	M	4.23	4.4	M	3.89	4.3	M	3.91	4.3	M	2.97	3.8	M	3.18	4.0	M	3.29	4.0	L	0.0	0
ENSOCUG00000015502	GPR83	H	178.22	9.8	M	7.73	5.3	M	19.42	6.6	M	27.71	7.1	M	10.01	5.7	M	5.46	4.8	M	16.08	6.3	M	4.55	4.5	M	22.07	6.8	L	0.0	0
ENSOCUG00000015957	MYOC	H	931.76	1.5	M	869.89	1.4	M	683.6	1.1	M	600.62	0.9	M	550.27	0.8	M	514.91	0.7	M	711.91	1.1	M	455.62	0.5	M	585.47	0.9	L	322.15	0
ENSOCUG00000016591	GFPT2	H	70.51	1.6	M	44.94	1.0	M	59.11	1.4	M	35.47	0.7	M	60.43	1.4	M	67.06	1.6	M	72.52	1.7	M	31.53	0.5	M	55.39	1.3	L	22.47	0
ENSOCUG00000016709	PDRG1	H	511.52	1.3	M	577.9	1.4	M	427.1	1.0	M	391.08	0.9	M	448.86	1.1	M	351.63	0.7	M	312.46	0.6	M	415.0	1.0	M	431.89	1.0	L	212.48	0
ENSOCUG00000017890	MDGA1	H	333.72	1.6	M	339.89	1.7	M	259.08	1.3	M	341.83	1.7	M	318.76	1.6	M	150.72	0.5	M	186.74	0.8	M	220.62	1.0	M	223.64	1.1	L	106.4	0
ENSOCUG00000017896	TTC26	H	60.89	2.2	M	18.93	0.5	M	24.53	0.9	M	20.68	0.7	M	19.65	0.6	M	24.79	0.9	M	19.89	0.6	M	17.69	0.4	M	22.54	0.8	L	13.74	0
ENSOCUG00000021375	ENSOCUG00000021375	H	559.0	5.3	M	266.57	4.3	M	222.87	4.0	M	249.74	4.2	M	251.67	4.2	M	204.21	3.9	M	278.81	4.3	M	276.99	4.3	M	252.69	4.2	L	13.99	0
ENSOCUG00000021477	ENSOCUG00000021477	H	1268.16	3.8	M	867.22	3.2	M	718.85	3.0	M	837.91	3.2	M	859.5	3.2	M	645.92	2.8	M	570.36	2.6	M	717.92	3.0	M	695.28	2.9	L	91.53	0
ENSOCUG00000021629	RASIP1	H	210.07	1.1	M	228.26	1.2	M	218.08	1.1	M	186.09	0.9	M	193.53	1.0	M	229.46	1.2	M	192.56	1.0	M	193.85	1.0	M	182.58	0.9	L	99.0	0
ENSOCUG00000021647	ENSOCUG00000021647	H	25685.93	7.7	M	10969.33	6.5	M	9004.5	6.2	M	11248.08	6.5	M	9103.13	6.2	M	7872.26	6.0	M	10308.41	6.4	M	9760.92	6.3	M	9723.44	6.3	L	121.56	0
ENSOCUG00000021704	PLEKHH3	H	571.58	1.1	M	650.93	1.3	M	536.53	1.0	M	639.46	1.3	M	454.26	0.8	M	551.19	1.1	M	500.11	0.9	M	468.35	0.8	M	402.13	0.6	L	261.91	0
ENSOCUG00000022309	ENSOCUG00000022309	H	767.01	1.1	M	720.76	1.0	M	618.48	0.8	M	793.67	1.2	M	579.25	0.7	M	536.23	0.6	M	606.96	0.8	M	692.26	1.0	M	697.82	1.0	L	353.09	0
ENSOCUG00000022352	ENSOCUG00000022352	H	150.47	1.2	M	114.27	0.8	M	113.43	0.8	M	121.18	0.9	M	122.09	0.9	M	101.04	0.7	M	75.75	0.2	M	105.83	0.7	M	108.21	0.7	L	64.53	0
ENSOCUG00000022364	ENSOCUG00000022364	H	92.89	1.6	M	74.46	1.3	M	58.99	1.0	M	50.65	0.8	M	42.02	0.5	M	46.84	0.6	M	44.04	0.6	M	63.04	1.1	M	46.51	0.7	L	30.07	0
ENSOCUG00000022413	ENSOCUG00000022413	H	65.78	1.6	M	57.04	1.4	M	48.94	1.2	M	40.19	0.9	M	51.16	1.2	M	40.13	0.9	M	63.41	1.6	M	46.75	1.1	M	47.57	1.1	L	21.1	0
ENSOCUG00000023058	IGSF8	H	139.41	1.2	M	98.19	0.7	M	120.54	1.0	M	103.13	0.8	M	96.93	0.7	M	108.82	0.9	M	126.05	1.0	M	96.52	0.7	M	100.84	0.7	L	61.07	0
ENSOCUG00000023236	TTLL4	H	155.85	1.2	M	109.24	0.7	M	95.91	0.5	M	131.14	0.9	M	115.21	0.7	M	93.73	0.4	M	129.04	0.9	M	78.9	0.2	M	100.31	0.5	L	68.55	0
ENSOCUG00000023448	GSTM2	H	3808.16	2.7	M	2882.86	2.3	M	2466.31	2.0	M	2560.47	2.1	M	2659.03	2.2	M	2614.82	2.1	M	2385.19	2.0	M	2707.58	2.2	M	2741.81	2.2	L	597.46	0
ENSOCUG00000024266	PLEKHH2	H	223.77	1.9	M	113.15	0.9	M	87.13	0.6	M	66.29	0.2	M	66.13	0.2	M	57.84	-0.0	M	66.95	0.2	M	68.0	0.2	M	55.01	-0.1	L	58.69	0
ENSOCUG00000024282	PLEKHB2	H	2435.41	10.6	M	1086.98	9.4	M	942.27	9.2	M	1062.95	9.4	M	1104.74	9.4	M	1065.74	9.4	M	868.87	9.1	M	1023.61	9.3	M	1090.71	9.4	L	1.48	0
ENSOCUG00000024443	ENSOCUG00000024443	H	303.55	3.0	M	281.27	2.9	M	257.6	2.7	M	270.84	2.8	M	224.63	2.5	M	198.45	2.4	M	202.69	2.4	M	274.34	2.8	M	256.96	2.7	L	38.78	0
ENSOCUG00000024734	ENSOCUG00000024734	H	78.3	1.4	M	45.54	0.6	M	40.6	0.5	M	31.12	0.1	M	34.06	0.2	M	42.89	0.5	M	34.01	0.2	M	42.2	0.5	M	37.68	0.4	L	29.66	0
ENSOCUG00000024825	LRFN1	H	22.59	2.2	M	12.23	1.3	M	11.08	1.2	M	14.33	1.5	M	9.62	0.9	M	8.95	0.8	M	13.92	1.5	M	7.33	0.6	M	13.72	1.4	L	4.7	0
ENSOCUG00000025023	ENSOCUG00000025023	H	36055.91	1.9	M	20466.96	1.1	M	16473.84	0.8	M	20943.17	1.1	M	17873.57	0.9	M	14166.47	0.6	M	20125.69	1.1	M	19191.63	1.0	M	19150.85	1.0	L	9616.89	0
ENSOCUG00000025077	ARID3B	H	125.96	1.1	M	71.88	0.3	M	82.8	0.5	M	77.38	0.4	M	96.16	0.8	M	83.28	0.5	M	71.18	0.3	M	65.36	0.2	M	69.03	0.3	L	56.87	0
ENSOCUG00000025655	GPR161	H	36.62	1.9	M	27.66	1.4	M	29.88	1.6	M	20.72	1.0	M	21.55	1.1	M	23.16	1.2	M	28.6	1.5	M	23.73	1.3	M	26.11	1.4	L	10.01	0
ENSOCUG00000025692	SLC5A3	H	309.94	1.9	M	254.2	1.6	M	249.49	1.6	M	249.66	1.6	M	220.52	1.4	M	213.2	1.4	M	277.16	1.8	M	252.52	1.6	M	189.09	1.2	L	82.21	0
ENSOCUG00000025816	ENSOCUG00000025816	H	49.88	2.3	M	27.87	1.4	M	26.17	1.3	M	22.21	1.1	M	25.55	1.3	M	29.9	1.5	M	34.38	1.7	M	27.28	1.4	M	28.07	1.4	L	10.4	0
ENSOCUG00000025840	RENBP	H	32.5	1.1	M	27.67	0.8	M	35.73	1.2	M	28.07	0.9	M	22.14	0.5	M	32.89	1.1	M	28.45	0.9	M	23.0	0.6	M	25.2	0.7	L	15.47	0
ENSOCUG00000025924	NXT1	H	56.97	1.1	M	36.13	0.4	M	39.26	0.5	M	42.27	0.7	M	33.28	0.3	M	35.71	0.4	M	35.77	0.4	M	33.33	0.3	M	28.36	0.1	L	26.84	0
ENSOCUG00000026479	SERPING1	H	233.97	1.2	M	149.79	0.5	M	202.73	1.0	M	173.58	0.8	M	144.17	0.5	M	150.28	0.6	M	202.38	1.0	M	109.89	0.1	M	160.54	0.6	L	102.93	0
ENSOCUG00000026517	RAI2	H	2296.88	1.6	M	1166.37	0.6	M	992.89	0.4	M	1212.35	0.6	M	924.11	0.3	M	984.9	0.3	M	935.51	0.3	M	925.11	0.2	M	1065.98	0.5	L	777.06	0
ENSOCUG00000027406	ENSOCUG00000027406	H	2895.65	4.3	M	1785.05	3.6	M	1495.69	3.4	M	1865.22	3.7	M	1647.94	3.5	M	1319.77	3.2	M	1241.95	3.1	M	1769.1	3.6	M	1728.47	3.6	L	144.17	0
ENSOCUG00000027585	BCL9L	H	1481.31	1.4	M	1342.53	1.3	M	1455.37	1.4	M	1437.29	1.4	M	1353.28	1.3	M	1429.28	1.4	M	910.96	0.7	M	1166.07	1.1	M	1058.0	0.9	L	557.37	0
ENSOCUG00000027792	TMEM52	H	274.97	1.1	M	171.4	0.4	M	131.75	0.0	M	124.08	-0.1	M	148.59	0.2	M	164.96	0.3	M	262.97	1.0	M	148.63	0.2	M	151.64	0.2	L	131.45	0
ENSOCUG00000027981	ISG15	H	74.2	2.2	M	34.23	1.0	M	21.2	0.4	M	22.75	0.5	M	14.6	-0.1	M	29.06	0.8	M	16.14	-0.0	M	25.65	0.7	M	20.0	0.3	L	16.65	0
ENSOCUG00000029019	ENSOCUG00000029019	H	67.78	1.6	M	49.48	1.2	M	63.23	1.6	M	37.53	0.8	M	48.45	1.2	M	53.65	1.3	M	70.39	1.7	M	58.23	1.4	M	53.51	1.3	L	22.06	0
ENSOCUG00000029474	ENSOCUG00000029474	H	26.62	1.9	M	22.6	1.7	M	21.58	1.6	M	26.01	1.9	M	16.52	1.3	M	22.0	1.6	M	18.36	1.4	M	23.83	1.8	M	13.25	0.9	L	7.09	0
ENSOCUG00000029818	ENSOCUG00000029818	H	22.63	2.4	M	8.18	0.9	M	24.79	2.5	M	10.78	1.3	M	9.45	1.2	M	11.0	1.4	M	10.34	1.2	M	6.92	0.7	M	11.08	1.3	L	4.24	0
ENSOCUG00000029866	ENSOCUG00000029866	H	26.82	1.1	M	15.79	0.3	M	20.85	0.8	M	16.66	0.5	M	10.37	-0.2	M	21.42	0.8	M	12.28	-0.0	M	12.59	0.0	M	20.73	0.7	L	12.21	0
ENSOCUG00000030212	ENSOCUG00000030212	H	14.69	1.3	M	12.75	1.1	M	10.43	0.9	M	12.14	1.1	M	11.36	1.0	M	16.28	1.5	M	13.32	1.2	M	9.14	0.6	M	12.15	1.0	L	5.84	0
ENSOCUG00000031036	ENSOCUG00000031036	H	127.28	4.0	M	74.39	3.2	M	52.57	2.7	M	76.79	3.2	M	66.42	3.0	M	67.29	3.1	M	48.33	2.6	M	65.96	3.0	M	49.61	2.6	L	8.41	0
ENSOCUG00000032475	MRLN	H	1107.28	1.3	M	697.77	0.6	M	457.46	-0.0	M	591.53	0.4	M	655.64	0.5	M	580.65	0.3	M	462.06	0.0	M	801.49	0.8	M	679.75	0.6	L	460.05	0
ENSOCUG00000032659	ENSOCUG00000032659	H	10.63	2.8	M	6.19	2.0	M	8.98	2.5	M	4.8	1.7	M	5.72	1.9	M	4.75	1.6	M	4.06	1.4	M	3.83	1.2	M	4.45	1.5	L	1.49	0
ENSOCUG00000034684	SCO2	H	30.14	1.4	M	17.84	0.7	M	20.64	0.8	M	20.41	0.9	M	21.08	0.9	M	20.24	0.8	M	20.5	0.9	M	16.54	0.6	M	13.14	0.2	L	11.24	0
ENSOCUG00000036188	ZNF550	H	19.78	1.3	M	10.66	0.5	M	13.06	0.8	M	11.36	0.5	M	13.49	0.8	M	15.95	1.1	M	12.53	0.7	M	12.14	0.7	M	19.97	1.4	L	7.74	0

## Sheet: L_H
		mother			child_1			child_2			child_3			child_4			child_5			child_6			child_7			child_8			father
ENSEBL ID	gene_name	ASE Prediction	norm_counts	log2fc	ASE Prediction	norm_counts	log2fc	ASE Prediction	norm_counts	log2fc	ASE Prediction	norm_counts	log2fc	ASE Prediction	norm_counts	log2fc	ASE Prediction	norm_counts	log2fc	ASE Prediction	norm_counts	log2fc	ASE Prediction	norm_counts	log2fc	ASE Prediction	norm_counts	log2fc	ASE Prediction	norm_counts	log2fc
ENSOCUG00000000107	MPPE1	L	57.14	-1.2	M	70.42	-0.9	M	79.64	-0.7	M	74.48	-0.8	M	62.7	-1.0	M	64.95	-1.0	M	67.15	-0.9	M	74.7	-0.8	M	70.26	-0.9	H	128.33	0
ENSOCUG00000000515	LGALS4	L	10.65	-2.0	M	11.18	-2.0	M	17.45	-1.3	M	12.58	-1.8	M	12.69	-1.8	M	23.22	-0.9	M	20.31	-1.1	M	14.88	-1.6	M	13.01	-1.7	H	43.42	0
ENSOCUG00000000724	SLC7A7	L	8.17	-1.4	M	10.96	-1.0	M	11.84	-0.9	M	16.37	-0.4	M	8.84	-1.3	M	9.91	-1.1	M	11.0	-1.0	M	10.25	-1.1	M	13.21	-0.7	H	21.5	0
ENSOCUG00000000984	ESRRG	L	10.83	-2.3	M	13.18	-2.0	M	26.59	-1.0	M	25.75	-1.1	M	19.48	-1.5	M	20.25	-1.4	M	23.05	-1.2	M	23.56	-1.2	M	13.29	-2.0	H	53.35	0
ENSOCUG00000001179	ARHGEF26	L	28.56	-1.8	M	67.09	-0.5	M	46.92	-1.1	M	74.42	-0.4	M	68.37	-0.5	M	54.87	-0.8	M	49.13	-1.0	M	61.02	-0.7	M	66.85	-0.5	H	97.35	0
ENSOCUG00000001816	PLCE1	L	19.22	-1.4	M	26.29	-1.0	M	35.21	-0.5	M	23.12	-1.1	M	30.92	-0.7	M	25.47	-1.0	M	24.48	-1.0	M	37.29	-0.5	M	26.77	-0.9	H	50.56	0
ENSOCUG00000001956	C12orf4	L	103.87	-1.3	M	129.0	-1.0	M	117.13	-1.1	M	129.22	-0.9	M	136.97	-0.9	M	133.18	-0.9	M	193.02	-0.4	M	138.49	-0.9	M	140.84	-0.8	H	252.81	0
ENSOCUG00000002119	ENSOCUG00000002119	L	27.13	-1.7	M	41.31	-1.1	M	55.05	-0.7	M	36.49	-1.2	M	48.11	-0.9	M	23.14	-1.9	M	46.59	-0.9	M	47.8	-0.8	M	36.23	-1.3	H	87.17	0
ENSOCUG00000002342	VSIG8	L	6.11	-2.0	M	10.27	-1.3	M	10.04	-1.3	M	9.22	-1.4	M	11.08	-1.1	M	13.28	-0.9	M	10.04	-1.3	M	9.98	-1.3	M	14.82	-0.7	H	25.04	0
ENSOCUG00000002556	BAK1	L	146.31	-1.1	M	251.74	-0.3	M	221.72	-0.5	M	211.47	-0.6	M	268.0	-0.2	M	259.12	-0.3	M	203.84	-0.6	M	237.7	-0.4	M	267.89	-0.2	H	313.91	0
ENSOCUG00000002929	CATSPER4	L	25.99	-1.2	M	32.47	-0.9	M	45.51	-0.4	M	39.2	-0.6	M	32.25	-0.9	M	66.6	0.1	M	47.97	-0.3	M	34.96	-0.8	M	38.39	-0.7	H	61.02	0
ENSOCUG00000003200	VGLL2	L	1277.03	-1.2	M	1405.32	-1.1	M	1310.12	-1.2	M	1899.0	-0.7	M	1167.62	-1.4	M	2272.73	-0.4	M	1618.85	-0.9	M	1771.57	-0.8	M	1314.29	-1.2	H	3033.89	0
ENSOCUG00000003388	SCARB2	L	1218.92	-1.3	M	1594.46	-0.9	M	1499.25	-1.0	M	1624.32	-0.9	M	1514.55	-1.0	M	1384.95	-1.2	M	1848.64	-0.7	M	1363.77	-1.2	M	1587.25	-1.0	H	3077.49	0
ENSOCUG00000003871	ENSOCUG00000003871	L	1392.35	-1.2	M	1860.93	-0.8	M	1727.71	-0.9	M	1900.28	-0.8	M	1605.66	-1.0	M	1746.42	-0.9	M	1481.86	-1.1	M	1782.67	-0.9	M	1652.59	-1.0	H	3269.64	0
ENSOCUG00000004103	IRAK4	L	50.29	-1.1	M	85.62	-0.3	M	94.98	-0.2	M	76.61	-0.4	M	79.28	-0.4	M	79.19	-0.4	M	89.23	-0.2	M	83.01	-0.3	M	87.62	-0.3	H	105.92	0
ENSOCUG00000004122	NIPSNAP1	L	10.1	-1.3	M	20.01	-0.4	M	24.75	-0.0	M	21.55	-0.2	M	18.04	-0.5	M	21.43	-0.2	M	22.98	-0.2	M	21.99	-0.2	M	18.23	-0.5	H	25.77	0
ENSOCUG00000004155	ACOX2	L	5.41	-3.0	M	23.48	-0.9	M	35.09	-0.3	M	23.54	-0.9	M	29.63	-0.6	M	38.73	-0.2	M	33.75	-0.4	M	40.4	-0.1	M	30.65	-0.5	H	44.34	0
ENSOCUG00000004260	TTPAL	L	6.58	-2.3	M	18.37	-0.9	M	22.27	-0.6	M	20.88	-0.7	M	19.59	-0.7	M	16.22	-1.0	M	14.53	-1.2	M	18.45	-0.8	M	20.96	-0.7	H	33.65	0
ENSOCUG00000004263	ADH5	L	196.94	-1.6	M	398.97	-0.5	M	342.79	-0.8	M	348.64	-0.7	M	409.75	-0.5	M	382.82	-0.6	M	400.52	-0.5	M	468.02	-0.3	M	440.49	-0.4	H	579.92	0
ENSOCUG00000004821	MLLT11	L	12.49	-3.2	M	15.21	-2.9	M	46.84	-1.2	M	35.29	-1.6	M	22.76	-2.3	M	44.84	-1.3	M	50.13	-1.2	M	29.45	-1.9	M	28.55	-2.0	H	111.95	0
ENSOCUG00000005172	ZSCAN30	L	10.11	-1.3	M	17.49	-0.5	M	16.51	-0.6	M	16.81	-0.5	M	18.12	-0.5	M	15.62	-0.7	M	17.51	-0.5	M	21.32	-0.2	M	18.4	-0.4	H	25.11	0
ENSOCUG00000005617	ENSOCUG00000005617	L	79.97	-1.3	M	108.82	-0.8	M	150.97	-0.3	M	194.24	0.0	M	100.01	-0.9	M	179.52	-0.1	M	150.15	-0.3	M	105.34	-0.9	M	113.75	-0.7	H	190.6	0
ENSOCUG00000005855	ASPA	L	81.53	-2.6	M	197.52	-1.3	M	131.48	-1.9	M	185.26	-1.4	M	126.05	-1.9	M	163.96	-1.6	M	153.09	-1.6	M	278.34	-0.8	M	197.06	-1.3	H	479.94	0
ENSOCUG00000006333	ENSOCUG00000006333	L	24.74	-1.4	M	38.34	-0.8	M	42.11	-0.6	M	36.34	-0.8	M	36.85	-0.8	M	47.53	-0.5	M	37.21	-0.8	M	49.64	-0.4	M	44.01	-0.6	H	65.61	0
ENSOCUG00000006508	PDE4B	L	14.82	-2.0	M	30.08	-0.9	M	32.11	-0.8	M	40.37	-0.5	M	38.98	-0.6	M	47.78	-0.3	M	33.46	-0.8	M	51.63	-0.2	M	42.22	-0.4	H	57.45	0
ENSOCUG00000006678	JAM2	L	32.4	-2.6	M	87.38	-1.1	M	147.05	-0.4	M	72.93	-1.4	M	85.83	-1.2	M	80.98	-1.2	M	117.04	-0.7	M	91.46	-1.1	M	112.68	-0.8	H	192.2	0
ENSOCUG00000006941	PMM1	L	65.86	-1.3	M	144.78	-0.2	M	149.75	-0.1	M	133.62	-0.3	M	102.39	-0.7	M	154.58	-0.1	M	106.1	-0.6	M	114.05	-0.5	M	131.31	-0.3	H	165.51	0
ENSOCUG00000007631	GPM6A	L	34.62	-1.2	M	51.84	-0.6	M	52.36	-0.6	M	47.37	-0.7	M	51.66	-0.6	M	41.52	-1.0	M	42.62	-0.9	M	57.48	-0.5	M	47.26	-0.8	H	80.1	0
ENSOCUG00000007867	PUS10	L	10.06	-1.3	M	23.26	-0.0	M	22.45	-0.1	M	21.16	-0.2	M	22.89	-0.0	M	26.09	0.1	M	18.02	-0.4	M	24.19	0.0	M	20.98	-0.2	H	23.95	0
ENSOCUG00000007893	GPAM	L	96.59	-1.1	M	125.57	-0.7	M	171.76	-0.2	M	146.49	-0.5	M	142.13	-0.5	M	180.98	-0.2	M	166.78	-0.3	M	121.09	-0.7	M	116.83	-0.8	H	202.13	0
ENSOCUG00000008316	STRIP2	L	135.48	-1.5	M	246.86	-0.7	M	248.9	-0.7	M	236.06	-0.7	M	316.27	-0.3	M	356.02	-0.2	M	317.95	-0.3	M	239.08	-0.7	M	294.81	-0.4	H	395.21	0
ENSOCUG00000008329	ADAMTS19	L	83.48	-1.7	M	190.83	-0.5	M	200.6	-0.4	M	228.97	-0.2	M	316.1	0.2	M	220.42	-0.3	M	263.21	-0.0	M	278.68	0.0	M	262.47	-0.1	H	272.08	0
ENSOCUG00000008702	GSTO1	L	208.84	-1.2	M	233.63	-1.1	M	344.49	-0.5	M	303.62	-0.7	M	382.37	-0.4	M	372.23	-0.4	M	374.08	-0.4	M	325.98	-0.6	M	275.94	-0.8	H	488.53	0
ENSOCUG00000008769	PCDHAC2	L	9.36	-3.7	M	38.82	-1.7	M	21.3	-2.5	M	42.38	-1.5	M	29.66	-2.1	M	11.68	-3.4	M	40.59	-1.6	M	27.62	-2.2	M	29.82	-2.1	H	122.29	0
ENSOCUG00000008954	GADD45A	L	352.72	-1.8	M	599.95	-1.1	M	810.81	-0.6	M	621.88	-1.0	M	596.8	-1.1	M	652.87	-0.9	M	321.15	-2.0	M	531.89	-1.2	M	454.77	-1.5	H	1244.01	0
ENSOCUG00000009052	EYA1	L	100.71	-1.2	M	98.85	-1.2	M	95.2	-1.2	M	86.03	-1.4	M	107.61	-1.1	M	112.15	-1.0	M	87.19	-1.4	M	118.79	-0.9	M	146.21	-0.6	H	225.29	0
ENSOCUG00000009100	ANKRD23	L	25004.74	-1.6	M	49028.57	-0.6	M	45063.63	-0.7	M	50873.13	-0.5	M	48273.23	-0.6	M	47540.18	-0.6	M	32398.01	-1.2	M	50470.81	-0.5	M	42733.14	-0.8	H	73268.22	0
ENSOCUG00000009330	FMO5	L	7.89	-2.9	M	15.05	-1.9	M	18.48	-1.7	M	17.01	-1.8	M	22.95	-1.3	M	14.17	-2.1	M	24.32	-1.3	M	16.22	-1.8	M	25.86	-1.1	H	57.57	0
ENSOCUG00000009405	ENSOCUG00000009405	L	16.49	-1.7	M	44.57	-0.3	M	31.47	-0.8	M	34.48	-0.6	M	33.17	-0.7	M	35.99	-0.6	M	60.31	0.2	M	37.88	-0.5	M	30.48	-0.8	H	54.33	0
ENSOCUG00000009512	PLA1A	L	17.68	-1.6	M	15.84	-1.7	M	18.0	-1.6	M	17.21	-1.6	M	19.48	-1.4	M	22.59	-1.2	M	31.99	-0.7	M	19.17	-1.4	M	22.01	-1.2	H	52.6	0
ENSOCUG00000009559	SANBR	L	33.36	-1.1	M	30.11	-1.2	M	28.65	-1.3	M	30.0	-1.2	M	43.33	-0.7	M	29.31	-1.3	M	38.83	-0.9	M	36.41	-1.0	M	33.01	-1.1	H	71.39	0
ENSOCUG00000009724	FAIM	L	15.54	-1.4	M	23.0	-0.9	M	28.5	-0.5	M	21.51	-1.0	M	32.61	-0.4	M	26.09	-0.7	M	21.49	-1.0	M	29.53	-0.5	M	27.35	-0.6	H	42.25	0
ENSOCUG00000010056	CYP1A2	L	7.83	-5.4	M	89.62	-1.9	M	54.92	-2.6	M	70.84	-2.3	M	68.42	-2.3	M	61.68	-2.5	M	29.88	-3.5	M	75.1	-2.2	M	61.34	-2.5	H	339.1	0
ENSOCUG00000010063	LRRC49	L	37.09	-1.5	M	33.53	-1.6	M	65.59	-0.6	M	32.83	-1.6	M	36.72	-1.5	M	37.42	-1.4	M	68.84	-0.6	M	43.4	-1.2	M	44.17	-1.2	H	101.41	0
ENSOCUG00000010229	MYH8	L	932.5	-3.6	M	1454.73	-3.0	M	4911.92	-1.2	M	815.52	-3.8	M	6080.11	-0.9	M	2356.23	-2.3	M	1531.81	-2.9	M	6277.47	-0.8	M	4505.45	-1.3	H	11242.76	0
ENSOCUG00000010425	FABP5	L	67.31	-1.1	M	135.97	-0.1	M	146.98	0.0	M	127.99	-0.2	M	124.35	-0.2	M	137.95	-0.1	M	109.39	-0.4	M	126.84	-0.2	M	126.98	-0.2	H	147.27	0
ENSOCUG00000010456	RASGEF1B	L	22.59	-1.4	M	25.05	-1.2	M	31.01	-0.9	M	22.99	-1.3	M	34.48	-0.7	M	36.64	-0.7	M	41.86	-0.5	M	38.93	-0.6	M	41.84	-0.5	H	58.21	0
ENSOCUG00000010550	B3GALT4	L	71.04	-1.3	M	128.14	-0.5	M	148.62	-0.3	M	142.43	-0.3	M	109.12	-0.7	M	120.26	-0.6	M	115.61	-0.6	M	123.96	-0.5	M	98.16	-0.9	H	177.27	0
ENSOCUG00000010755	PLCB4	L	45.65	-1.5	M	110.0	-0.2	M	119.03	-0.1	M	92.79	-0.4	M	109.38	-0.2	M	107.8	-0.2	M	107.32	-0.2	M	111.78	-0.2	M	110.37	-0.2	H	126.31	0
ENSOCUG00000010818	NEPRO	L	15.72	-1.1	M	20.67	-0.7	M	17.52	-0.9	M	23.32	-0.5	M	32.72	-0.0	M	24.75	-0.4	M	38.61	0.2	M	26.51	-0.3	M	24.44	-0.4	H	32.99	0
ENSOCUG00000011456	ENSOCUG00000011456	L	32.66	-2.5	M	53.15	-1.8	M	44.39	-2.1	M	46.09	-2.0	M	53.92	-1.8	M	44.04	-2.1	M	35.81	-2.4	M	40.24	-2.2	M	50.81	-1.9	H	188.14	0
ENSOCUG00000011677	NSUN3	L	4.24	-1.5	M	5.27	-1.2	M	4.89	-1.3	M	6.94	-0.8	M	5.14	-1.2	M	5.6	-1.2	M	6.05	-1.0	M	4.57	-1.4	M	5.75	-1.1	H	12.3	0
ENSOCUG00000011858	TPD52L1	L	12.34	-2.3	M	23.03	-1.4	M	40.14	-0.6	M	19.41	-1.6	M	27.85	-1.1	M	43.66	-0.5	M	11.88	-2.4	M	15.65	-1.9	M	18.72	-1.7	H	60.98	0
ENSOCUG00000012330	WARS2	L	11.73	-1.2	M	15.62	-0.7	M	18.09	-0.6	M	16.53	-0.7	M	17.33	-0.6	M	12.79	-1.0	M	15.45	-0.7	M	19.46	-0.4	M	15.98	-0.7	H	26.55	0
ENSOCUG00000012564	EIF3K	L	8.3	-1.8	M	10.95	-1.4	M	10.76	-1.4	M	14.64	-1.0	M	12.49	-1.2	M	12.04	-1.3	M	14.17	-1.0	M	14.06	-1.0	M	11.92	-1.3	H	28.89	0
ENSOCUG00000012571	COA4	L	51.28	-1.2	M	74.84	-0.6	M	53.88	-1.1	M	61.37	-0.9	M	54.83	-1.1	M	58.08	-1.0	M	56.21	-1.1	M	59.39	-1.0	M	50.4	-1.2	H	116.87	0
ENSOCUG00000013088	HAUS4	L	26.32	-1.5	M	27.35	-1.5	M	55.59	-0.4	M	42.1	-0.8	M	48.64	-0.6	M	53.41	-0.5	M	32.28	-1.3	M	51.97	-0.6	M	31.03	-1.3	H	76.76	0
ENSOCUG00000013103	COX7A1	L	1966.85	-1.1	M	1979.97	-1.0	M	1637.45	-1.3	M	1793.34	-1.2	M	1808.56	-1.2	M	2254.35	-0.9	M	1730.21	-1.2	M	2009.62	-1.0	M	2048.46	-1.0	H	4079.79	0
ENSOCUG00000013324	HCRT	L	6.21	-2.0	M	12.28	-1.0	M	10.89	-1.2	M	12.49	-1.0	M	10.73	-1.2	M	13.17	-0.9	M	14.08	-0.8	M	8.63	-1.5	M	10.82	-1.2	H	24.86	0
ENSOCUG00000013968	ENSOCUG00000013968	L	1.25	-2.8	M	3.18	-1.4	M	3.02	-1.4	M	3.53	-1.2	M	4.73	-0.8	M	3.71	-1.2	M	4.26	-1.0	M	5.4	-0.6	M	2.38	-1.8	H	8.15	0
ENSOCUG00000013987	FGF1	L	43.38	-1.2	M	73.77	-0.4	M	47.28	-1.1	M	60.41	-0.7	M	37.73	-1.3	M	58.54	-0.7	M	48.22	-1.0	M	51.97	-0.9	M	67.81	-0.5	H	96.81	0
ENSOCUG00000013992	TSPAN15	L	69.44	-1.5	M	198.41	0.1	M	201.54	0.1	M	175.13	-0.1	M	200.91	0.1	M	164.12	-0.2	M	174.24	-0.1	M	180.11	-0.1	M	196.18	0.0	H	192.15	0
ENSOCUG00000014205	AKAP6	L	86.12	-1.5	M	203.88	-0.3	M	251.63	-0.0	M	294.88	0.2	M	291.34	0.2	M	169.92	-0.6	M	206.44	-0.3	M	283.24	0.2	M	246.16	-0.0	H	251.2	0
ENSOCUG00000014668	PPARGC1A	L	21.63	-1.9	M	49.97	-0.7	M	57.03	-0.5	M	48.57	-0.7	M	40.46	-1.0	M	52.8	-0.6	M	37.82	-1.1	M	56.73	-0.5	M	42.09	-0.9	H	80.75	0
ENSOCUG00000014817	ENSOCUG00000014817	L	62.47	-1.7	M	129.63	-0.6	M	68.03	-1.5	M	107.98	-0.9	M	85.32	-1.2	M	83.4	-1.2	M	72.24	-1.4	M	88.91	-1.1	M	114.35	-0.8	H	196.36	0
ENSOCUG00000014850	ITGB6	L	49.96	-1.1	M	87.55	-0.3	M	72.2	-0.5	M	79.8	-0.4	M	77.42	-0.4	M	60.66	-0.8	M	78.22	-0.4	M	78.93	-0.4	M	62.7	-0.7	H	104.67	0
ENSOCUG00000014973	GALK1	L	27.14	-1.2	M	31.57	-1.0	M	36.71	-0.8	M	36.27	-0.8	M	29.11	-1.1	M	41.49	-0.6	M	37.11	-0.8	M	32.35	-1.0	M	42.95	-0.6	H	63.78	0
ENSOCUG00000014981	ABCB1	L	40.62	-1.2	M	65.45	-0.5	M	66.4	-0.5	M	64.07	-0.6	M	59.24	-0.7	M	77.86	-0.3	M	72.88	-0.4	M	70.43	-0.4	M	65.87	-0.5	H	94.26	0
ENSOCUG00000015382	MAB21L3	L	0.42	-5.1	M	1.55	-3.3	M	0.63	-4.5	M	0.46	-4.9	M	0.65	-4.2	M	2.95	-2.3	M	2.18	-2.7	M	1.64	-3.3	M	0.64	-4.5	H	14.65	0
ENSOCUG00000015757	ENSOCUG00000015757	L	6.47	-2.2	M	10.19	-1.6	M	11.42	-1.5	M	8.88	-1.8	M	8.57	-1.8	M	15.52	-1.0	M	12.88	-1.2	M	7.91	-2.0	M	7.92	-2.0	H	30.36	0
ENSOCUG00000015831	DUSP23	L	52.52	-2.3	M	138.67	-0.9	M	129.0	-1.0	M	155.71	-0.7	M	141.68	-0.9	M	123.56	-1.0	M	115.36	-1.2	M	140.27	-0.9	M	127.35	-1.0	H	256.78	0
ENSOCUG00000016171	CDH23	L	49.22	-1.1	M	90.86	-0.2	M	62.03	-0.8	M	76.37	-0.5	M	84.52	-0.3	M	85.5	-0.3	M	103.78	-0.0	M	78.68	-0.4	M	79.38	-0.4	H	106.35	0
ENSOCUG00000016518	KIAA1217	L	245.63	-1.6	M	394.97	-0.9	M	348.73	-1.1	M	338.14	-1.2	M	361.27	-1.1	M	370.04	-1.0	M	447.13	-0.8	M	352.29	-1.1	M	233.08	-1.7	H	757.62	0
ENSOCUG00000016756	NEK1	L	49.8	-1.1	M	74.38	-0.5	M	92.72	-0.2	M	74.33	-0.5	M	93.87	-0.2	M	97.53	-0.1	M	97.5	-0.1	M	101.1	-0.0	M	88.7	-0.2	H	104.94	0
ENSOCUG00000016775	NFKBID	L	16.49	-1.5	M	15.68	-1.6	M	24.41	-1.0	M	16.48	-1.5	M	15.77	-1.6	M	18.65	-1.4	M	27.66	-0.8	M	18.85	-1.3	M	23.7	-1.0	H	47.95	0
ENSOCUG00000016875	GATB	L	54.25	-1.3	M	71.67	-0.9	M	79.19	-0.7	M	50.67	-1.4	M	83.24	-0.6	M	78.66	-0.7	M	56.17	-1.2	M	82.36	-0.7	M	81.11	-0.7	H	130.24	0
ENSOCUG00000017098	C6orf163	L	3.12	-2.2	M	3.56	-2.0	M	9.67	-0.6	M	4.95	-1.5	M	10.54	-0.5	M	3.58	-2.0	M	10.06	-0.5	M	8.37	-0.7	M	9.29	-0.6	H	14.44	0
ENSOCUG00000017793	ENSOCUG00000017793	L	12.09	-1.9	M	15.54	-1.5	M	20.22	-1.2	M	21.28	-1.1	M	14.13	-1.7	M	13.77	-1.7	M	13.67	-1.7	M	15.17	-1.6	M	16.13	-1.5	H	44.69	0
ENSOCUG00000017794	TULP2	L	22.82	-1.5	M	31.67	-1.0	M	39.96	-0.7	M	33.24	-1.0	M	38.53	-0.7	M	46.82	-0.5	M	34.22	-1.0	M	30.69	-1.1	M	42.38	-0.6	H	64.99	0
ENSOCUG00000017874	STK39	L	22.26	-1.2	M	26.01	-0.9	M	40.52	-0.3	M	44.49	-0.2	M	34.05	-0.5	M	36.54	-0.4	M	34.99	-0.5	M	39.98	-0.3	M	34.27	-0.5	H	49.29	0
ENSOCUG00000017907	TMEM37	L	6.5	-2.4	M	15.52	-1.1	M	8.86	-1.9	M	14.67	-1.2	M	7.36	-2.2	M	8.95	-1.9	M	8.05	-2.1	M	12.15	-1.5	M	7.88	-2.1	H	33.33	0
ENSOCUG00000021020	KDM8	L	7.74	-1.6	M	13.95	-0.7	M	10.68	-1.1	M	12.08	-0.9	M	15.98	-0.5	M	10.23	-1.2	M	9.75	-1.3	M	10.98	-1.0	M	12.32	-0.9	H	22.88	0
ENSOCUG00000021270	PARP3	L	29.65	-1.5	M	45.18	-0.9	M	49.55	-0.8	M	34.83	-1.3	M	29.26	-1.5	M	65.58	-0.4	M	41.15	-1.0	M	26.97	-1.6	M	31.37	-1.4	H	84.13	0
ENSOCUG00000021716	DHRS4	L	206.08	-1.4	M	243.93	-1.1	M	277.91	-0.9	M	236.25	-1.2	M	249.8	-1.1	M	314.34	-0.8	M	214.73	-1.3	M	244.92	-1.1	M	267.83	-1.0	H	533.01	0
ENSOCUG00000021767	HYKK	L	6.37	-1.6	M	10.42	-0.8	M	12.3	-0.6	M	12.94	-0.6	M	15.49	-0.3	M	13.47	-0.5	M	12.6	-0.6	M	14.35	-0.4	M	14.86	-0.3	H	19.06	0
ENSOCUG00000022219	BEST3	L	37.97	-1.8	M	88.59	-0.6	M	78.06	-0.7	M	56.39	-1.2	M	73.54	-0.8	M	44.61	-1.6	M	38.28	-1.8	M	84.81	-0.6	M	79.65	-0.7	H	130.1	0
ENSOCUG00000022239	ENSOCUG00000022239	L	2.29	-3.8	M	10.21	-1.6	M	1.82	-4.0	M	2.01	-3.9	M	8.14	-1.9	M	2.8	-3.6	M	3.19	-3.4	M	10.62	-1.6	M	3.91	-3.0	H	31.19	0
ENSOCUG00000022245	NDRG4	L	6.98	-2.8	M	24.75	-1.0	M	21.51	-1.2	M	24.9	-1.0	M	18.05	-1.4	M	24.05	-1.0	M	14.76	-1.7	M	24.09	-1.0	M	26.63	-0.9	H	50.05	0
ENSOCUG00000022444	ENSOCUG00000022444	L	149.96	-1.1	M	216.56	-0.5	M	236.91	-0.4	M	172.07	-0.9	M	230.29	-0.5	M	258.38	-0.3	M	202.19	-0.6	M	278.26	-0.2	M	220.03	-0.5	H	315.87	0
ENSOCUG00000022457	MSANTD4	L	27.08	-1.1	M	49.35	-0.3	M	43.78	-0.4	M	50.82	-0.2	M	47.82	-0.3	M	34.9	-0.8	M	41.51	-0.5	M	61.91	0.1	M	42.98	-0.5	H	59.77	0
ENSOCUG00000022657	ENSOCUG00000022657	L	917.44	-2.4	M	3064.61	-0.7	M	2555.75	-0.9	M	3066.79	-0.7	M	2749.83	-0.8	M	2059.48	-1.3	M	3032.15	-0.7	M	2956.41	-0.7	M	2834.11	-0.8	H	4917.06	0
ENSOCUG00000023110	ENSOCUG00000023110	L	131.32	-1.2	M	262.41	-0.2	M	232.44	-0.4	M	201.84	-0.6	M	244.99	-0.3	M	246.74	-0.3	M	194.48	-0.6	M	253.85	-0.2	M	237.68	-0.3	H	301.21	0
ENSOCUG00000023822	ENSOCUG00000023822	L	11.22	-1.8	M	23.15	-0.8	M	19.49	-1.1	M	24.18	-0.8	M	19.03	-1.1	M	18.7	-1.1	M	18.13	-1.2	M	22.89	-0.8	M	26.69	-0.6	H	40.46	0
ENSOCUG00000026591	CRPPA	L	25.85	-1.1	M	37.65	-0.5	M	40.01	-0.4	M	30.4	-0.9	M	38.02	-0.5	M	39.66	-0.5	M	54.11	-0.0	M	42.15	-0.4	M	41.36	-0.4	H	54.98	0
ENSOCUG00000027409	ENSOCUG00000027409	L	167.6	-1.3	M	319.47	-0.4	M	327.55	-0.4	M	319.19	-0.4	M	286.01	-0.6	M	222.86	-0.9	M	240.98	-0.8	M	197.94	-1.1	M	250.16	-0.8	H	422.6	0
ENSOCUG00000027493	APMAP	L	125.37	-1.1	M	124.51	-1.1	M	190.97	-0.4	M	203.81	-0.4	M	138.82	-0.9	M	200.18	-0.4	M	163.66	-0.7	M	116.23	-1.2	M	109.92	-1.2	H	260.88	0
ENSOCUG00000027519	SORBS3	L	79.82	-1.3	M	106.43	-0.9	M	131.55	-0.6	M	108.26	-0.9	M	99.89	-1.0	M	119.99	-0.7	M	140.7	-0.5	M	93.93	-1.1	M	115.56	-0.8	H	201.08	0
ENSOCUG00000027987	ENSOCUG00000027987	L	104.65	-1.2	M	160.76	-0.6	M	182.45	-0.4	M	227.54	-0.1	M	235.09	-0.0	M	125.65	-0.9	M	207.09	-0.2	M	235.69	-0.0	M	203.19	-0.2	H	236.19	0
ENSOCUG00000029014	C1orf105	L	4.65	-1.9	M	9.12	-0.9	M	8.96	-0.9	M	4.8	-1.7	M	8.03	-1.0	M	8.08	-1.1	M	6.66	-1.3	M	6.83	-1.3	M	4.08	-2.0	H	17.02	0
ENSOCUG00000031721	HSBP1L1	L	3.49	-1.8	M	4.8	-1.4	M	3.38	-1.9	M	3.95	-1.5	M	7.82	-0.7	M	4.93	-1.3	M	6.69	-0.8	M	9.05	-0.4	M	5.44	-1.2	H	12.28	0
ENSOCUG00000032954	INCA1	L	12.98	-1.6	M	13.9	-1.5	M	14.39	-1.5	M	12.98	-1.6	M	18.53	-1.1	M	18.51	-1.1	M	15.1	-1.4	M	15.34	-1.4	M	14.95	-1.4	H	40.43	0
ENSOCUG00000033434	ENSOCUG00000033434	L	7.3	-1.3	M	9.0	-1.0	M	11.52	-0.6	M	6.21	-1.4	M	7.62	-1.1	M	8.15	-1.1	M	12.75	-0.5	M	7.32	-1.3	M	12.64	-0.5	H	17.82	0
ENSOCUG00000034268	ENSOCUG00000034268	L	64.06	-2.3	M	133.05	-1.2	M	194.89	-0.7	M	190.83	-0.7	M	101.58	-1.6	M	121.23	-1.3	M	213.47	-0.5	M	175.3	-0.8	M	220.37	-0.5	H	306.29	0
ENSOCUG00000038496	DHX40	L	80.25	-1.2	M	135.16	-0.5	M	170.7	-0.1	M	147.45	-0.3	M	135.17	-0.4	M	140.32	-0.4	M	155.26	-0.3	M	139.02	-0.4	M	162.81	-0.2	H	184.74	0

## Sheet: H_M_Or_M_L
		mother			child_1			child_2			child_3			child_4			child_5			child_6			child_7			child_8			father
ENSEBL ID	gene_name	ASE Prediction	norm_counts	log2fc	ASE Prediction	norm_counts	log2fc	ASE Prediction	norm_counts	log2fc	ASE Prediction	norm_counts	log2fc	ASE Prediction	norm_counts	log2fc	ASE Prediction	norm_counts	log2fc	ASE Prediction	norm_counts	log2fc	ASE Prediction	norm_counts	log2fc	ASE Prediction	norm_counts	log2fc	ASE Prediction	norm_counts	log2fc
ENSOCUG00000000025	SLCO2A1	H	31.18	1.6	M	12.68	0.3	H	21.61	1.1	M	14.33	0.5	M	15.0	0.6	H	22.56	1.1	H	18.55	0.9	M	12.64	0.3	M	16.59	0.7	M	10.29	0
ENSOCUG00000000485	NAF1	H	175.93	1.2	M	130.91	0.7	M	82.94	0.1	M	121.24	0.6	M	115.75	0.5	M	110.49	0.5	H	161.78	1.0	M	87.98	0.2	M	82.75	0.1	M	78.9	0
ENSOCUG00000000744	PLTP	H	387.86	0.8	M	343.25	0.7	H	469.1	1.1	H	397.05	0.9	M	283.04	0.4	M	350.85	0.7	M	330.65	0.6	M	209.2	-0.1	M	316.77	0.5	M	218.94	0
ENSOCUG00000001145	GRIP2	H	709.98	1.4	H	763.24	1.5	H	700.71	1.3	H	620.13	1.2	H	859.78	1.6	H	786.48	1.5	M	232.76	-0.3	H	778.75	1.5	H	715.09	1.4	M	277.69	0
ENSOCUG00000001211	ENSOCUG00000001211	H	681.98	1.9	H	649.42	1.8	H	600.77	1.7	H	674.93	1.9	M	72.4	-1.3	M	67.01	-1.4	M	134.44	-0.4	M	85.48	-1.1	M	82.88	-1.1	M	182.87	0
ENSOCUG00000001676	EZH2	H	44.85	1.0	M	27.91	0.3	M	34.61	0.7	H	44.11	1.0	H	40.22	0.9	M	33.02	0.6	H	37.31	0.8	M	33.37	0.6	M	33.78	0.6	M	21.95	0
ENSOCUG00000001963	TNS1	H	1345.3	1.0	M	941.07	0.5	M	1005.32	0.6	M	891.3	0.4	M	726.97	0.1	M	977.63	0.6	H	1729.71	1.4	M	782.47	0.2	M	879.36	0.4	M	658.1	0
ENSOCUG00000002075	ENSOCUG00000002075	H	454.44	1.7	M	199.14	0.5	M	146.77	0.1	M	136.65	-0.1	M	191.7	0.4	M	167.15	0.2	H	347.3	1.3	M	172.39	0.3	M	161.68	0.2	M	141.15	0
ENSOCUG00000002095	NR1H3	H	104.19	0.9	M	73.12	0.4	H	112.07	1.0	M	47.59	-0.2	M	83.98	0.6	M	46.74	-0.2	H	122.76	1.2	M	74.82	0.4	M	81.46	0.6	M	54.66	0
ENSOCUG00000002126	ENSOCUG00000002126	H	39.17	0.8	M	34.77	0.6	M	36.83	0.7	H	49.74	1.1	H	42.44	0.9	H	41.95	0.9	M	22.15	0.0	M	32.45	0.5	M	34.12	0.6	M	23.31	0
ENSOCUG00000002487	LGALS2	H	17.68	1.5	M	8.32	0.4	M	6.82	0.2	M	9.82	0.6	H	18.49	1.5	M	10.44	0.7	M	9.73	0.7	M	8.74	0.5	H	11.42	0.8	M	5.82	0
ENSOCUG00000002707	MID1IP1	H	660.8	0.8	H	668.18	0.8	H	717.42	0.9	M	632.78	0.7	H	1144.66	1.6	M	482.99	0.3	M	519.59	0.4	M	539.46	0.5	M	645.02	0.7	M	389.39	0
ENSOCUG00000002811	ZBTB39	H	42.66	0.8	M	35.91	0.5	H	45.82	0.9	H	53.52	1.1	M	41.08	0.7	H	49.62	1.0	M	28.85	0.2	M	29.01	0.2	M	31.5	0.4	M	24.91	0
ENSOCUG00000002836	PCK2	H	51.02	1.4	M	31.07	0.7	H	42.15	1.1	M	28.21	0.5	M	16.25	-0.3	M	28.64	0.6	M	22.1	0.2	M	16.51	-0.2	M	19.55	0.0	M	19.44	0
ENSOCUG00000003048	TPPP	H	88.37	1.1	M	61.76	0.6	H	77.1	0.9	M	64.42	0.7	H	76.63	0.9	M	66.02	0.7	M	48.54	0.3	H	79.19	1.0	H	77.7	0.9	M	41.17	0
ENSOCUG00000003426	WSCD1	H	1100.7	1.6	H	741.04	1.1	M	473.99	0.4	H	802.95	1.2	M	371.29	0.1	M	352.27	0.0	M	511.19	0.5	M	487.71	0.5	M	544.6	0.6	M	352.14	0
ENSOCUG00000003452	PPM1K	H	552.57	1.0	H	527.0	0.9	H	511.96	0.8	M	358.0	0.3	H	790.57	1.5	M	343.34	0.3	M	267.34	-0.1	H	782.64	1.5	H	699.29	1.3	M	285.58	0
ENSOCUG00000003593	ACSL5	H	20.03	1.1	H	18.22	0.9	H	17.09	0.9	M	15.65	0.7	M	10.92	0.2	M	11.3	0.2	M	12.56	0.4	H	19.19	1.0	H	16.14	0.8	M	9.23	0
ENSOCUG00000003897	ENSOCUG00000003897	H	39.66	2.3	M	4.44	-0.9	M	5.02	-0.7	M	7.91	0.0	M	7.22	-0.2	M	6.74	-0.3	H	30.96	1.9	M	6.08	-0.4	M	8.0	-0.0	M	8.02	0
ENSOCUG00000003942	ENSOCUG00000003942	H	48.41	1.1	M	35.45	0.7	H	58.75	1.4	M	37.45	0.7	H	44.75	1.0	H	45.22	1.0	M	29.34	0.4	H	49.32	1.1	H	43.98	1.0	M	22.63	0
ENSOCUG00000004172	VSIG4	H	12.85	1.2	M	7.26	0.4	H	20.27	1.9	H	14.05	1.4	H	12.86	1.3	H	16.3	1.6	H	17.03	1.6	M	8.53	0.7	H	13.88	1.4	M	5.58	0
ENSOCUG00000004266	FAM222A	H	36.0	1.1	M	28.72	0.7	M	21.19	0.3	H	32.32	0.9	M	23.78	0.5	M	20.37	0.3	H	34.98	1.1	M	22.41	0.4	M	20.8	0.3	M	17.34	0
ENSOCUG00000004426	SOGA1	H	157.85	0.8	M	124.42	0.4	M	157.31	0.7	M	133.84	0.5	M	137.4	0.6	M	139.06	0.6	H	193.29	1.0	M	115.84	0.3	M	154.31	0.7	M	93.52	0
ENSOCUG00000004501	ENSOCUG00000004501	H	26.82	1.6	H	15.82	0.9	M	13.23	0.6	M	12.33	0.5	M	11.17	0.3	M	14.08	0.7	M	8.06	-0.2	M	14.15	0.7	H	16.89	1.0	M	8.9	0
ENSOCUG00000005091	SERPINB9	H	32.14	1.1	H	33.37	1.1	H	41.66	1.5	M	23.99	0.6	M	18.92	0.3	M	8.35	-0.8	M	24.63	0.7	M	18.54	0.3	M	20.08	0.4	M	15.05	0
ENSOCUG00000005286	CACNA2D2	H	284.4	1.3	H	365.85	1.7	H	339.62	1.6	H	315.56	1.5	H	322.41	1.5	H	255.96	1.2	M	133.61	0.3	H	286.46	1.4	H	328.38	1.6	M	111.86	0
ENSOCUG00000005306	C3orf18	H	67.79	1.0	H	81.21	1.3	M	49.93	0.6	H	56.39	0.8	M	50.7	0.6	H	57.24	0.8	M	24.52	-0.4	H	67.92	1.0	M	49.5	0.6	M	33.34	0
ENSOCUG00000005669	ADGRD1	H	54.23	0.9	H	51.44	0.8	H	72.57	1.3	H	54.69	0.9	H	50.91	0.9	H	72.63	1.3	M	35.95	0.3	M	41.35	0.5	M	40.44	0.5	M	28.76	0
ENSOCUG00000005679	ENSOCUG00000005679	H	172.06	0.9	H	160.96	0.8	H	222.55	1.3	H	189.39	1.0	H	170.03	0.9	H	177.88	0.9	M	121.19	0.4	H	161.54	0.8	H	164.91	0.8	M	93.31	0
ENSOCUG00000005680	ENSOCUG00000005680	H	373.42	0.8	M	355.67	0.7	H	472.28	1.1	H	494.3	1.2	H	498.01	1.2	H	523.7	1.2	M	206.2	-0.1	H	490.47	1.2	H	415.47	0.9	M	219.0	0
ENSOCUG00000006561	ENSOCUG00000006561	H	58.51	1.9	H	35.12	1.2	M	11.44	-0.4	M	12.84	-0.2	M	6.41	-1.2	M	17.15	0.2	M	21.62	0.5	H	27.52	0.9	M	21.42	0.5	M	15.49	0
ENSOCUG00000006633	KIF6	H	150.17	1.9	H	78.03	1.0	M	48.76	0.3	H	67.95	0.8	M	54.4	0.5	M	54.63	0.5	H	97.66	1.3	M	45.36	0.2	M	56.15	0.5	M	39.8	0
ENSOCUG00000006999	C2	H	30.59	1.6	M	15.71	0.6	H	22.8	1.2	H	22.58	1.2	M	14.56	0.6	H	18.61	0.9	M	11.84	0.2	M	11.61	0.2	M	15.11	0.6	M	10.13	0
ENSOCUG00000007039	ENSOCUG00000007039	H	904.3	2.0	M	275.5	0.3	M	372.78	0.7	H	480.58	1.1	M	326.61	0.5	M	314.79	0.4	M	291.51	0.3	M	240.57	0.1	M	212.48	-0.1	M	231.64	0
ENSOCUG00000007056	ENSOCUG00000007056	H	587.0	1.0	H	548.24	0.9	H	756.22	1.4	H	668.18	1.2	H	489.88	0.8	H	840.04	1.5	M	453.79	0.6	M	335.42	0.2	H	532.78	0.9	M	289.86	0
ENSOCUG00000007943	ENSOCUG00000007943	H	591.77	0.8	H	876.72	1.4	M	434.55	0.4	M	318.03	-0.1	H	738.65	1.2	H	778.33	1.2	M	369.03	0.2	M	404.21	0.3	H	982.45	1.6	M	332.11	0
ENSOCUG00000008024	SMOX	H	126.55	0.8	M	117.68	0.7	M	113.96	0.6	M	114.95	0.6	M	88.1	0.2	M	118.49	0.7	H	140.6	0.9	H	150.71	1.0	M	117.77	0.7	M	74.45	0
ENSOCUG00000008165	MTFR1	H	50.12	1.1	M	32.16	0.5	H	55.25	1.2	H	52.36	1.2	H	65.7	1.5	M	31.1	0.4	H	79.97	1.8	H	72.02	1.6	H	41.46	0.8	M	23.26	0
ENSOCUG00000008416	ZNF398	H	103.44	1.1	M	70.49	0.5	H	95.54	0.9	H	113.19	1.2	H	87.58	0.8	H	89.74	0.8	M	80.76	0.7	M	76.21	0.6	M	62.4	0.3	M	49.18	0
ENSOCUG00000008841	GLUL	H	3593.48	1.2	M	952.48	-0.7	M	1409.59	-0.1	M	1292.35	-0.3	M	1377.66	-0.2	M	1211.91	-0.4	H	3845.02	1.3	M	1233.7	-0.3	M	1073.46	-0.5	M	1556.38	0
ENSOCUG00000009061	PACC1	H	31.18	0.9	M	22.19	0.4	H	33.94	1.0	M	27.5	0.7	H	29.88	0.8	H	36.69	1.1	H	29.37	0.8	M	27.44	0.7	H	30.47	0.8	M	16.98	0
ENSOCUG00000009360	MST1R	H	26.89	1.4	M	11.69	0.2	M	15.75	0.6	M	10.81	0.1	M	9.92	-0.0	M	11.39	0.1	H	24.53	1.2	M	9.3	-0.1	M	8.85	-0.2	M	10.57	0
ENSOCUG00000009644	TUBE1	H	222.95	1.5	M	73.38	-0.1	H	199.25	1.4	H	193.29	1.3	H	206.01	1.4	H	230.57	1.6	M	45.89	-0.8	M	56.27	-0.5	H	256.5	1.7	M	77.41	0
ENSOCUG00000010253	TMEM209	H	2282.26	2.2	H	999.32	1.0	M	637.52	0.3	M	351.48	-0.5	H	940.06	0.9	M	542.03	0.1	M	324.73	-0.6	M	451.99	-0.2	M	842.76	0.7	M	506.54	0
ENSOCUG00000010790	C2CD2L	H	326.32	1.0	M	194.25	0.3	M	216.15	0.4	H	278.37	0.8	M	219.92	0.5	M	226.92	0.5	H	313.01	1.0	M	201.44	0.3	M	205.24	0.4	M	159.69	0
ENSOCUG00000011139	PLA2G4F	H	52.95	0.8	M	31.02	-0.0	M	48.94	0.7	M	47.25	0.6	M	49.5	0.7	H	70.14	1.2	M	31.05	-0.0	M	25.02	-0.3	M	41.99	0.4	M	30.9	0
ENSOCUG00000011212	TP53I3	H	85.55	0.9	H	102.25	1.1	M	54.81	0.2	M	65.81	0.5	H	119.92	1.4	H	91.91	1.0	M	40.91	-0.2	M	53.33	0.2	M	49.54	0.1	M	46.63	0
ENSOCUG00000011525	PPL	H	129.76	1.2	M	71.9	0.4	H	111.1	1.0	M	65.49	0.3	M	79.79	0.6	H	148.75	1.4	H	129.3	1.2	M	56.11	0.0	H	99.94	0.9	M	54.67	0
ENSOCUG00000011672	LSM11	H	9.12	1.0	M	6.37	0.5	M	7.56	0.7	H	7.77	0.8	H	8.5	0.9	M	5.83	0.4	H	14.29	1.6	M	5.44	0.2	H	10.47	1.2	M	4.52	0
ENSOCUG00000011700	VWA2	H	117.28	1.0	H	136.86	1.3	H	157.95	1.5	H	144.21	1.3	H	96.01	0.8	H	119.41	1.1	M	50.83	-0.1	M	84.7	0.6	H	112.36	1.0	M	57.22	0
ENSOCUG00000011746	NR4A1	H	1689.17	1.2	H	2558.6	1.8	H	2607.41	1.9	H	1888.3	1.4	H	2774.93	2.0	H	1516.26	1.1	M	878.25	0.3	H	2003.2	1.5	H	1607.29	1.2	M	711.2	0
ENSOCUG00000012115	AXIN2	H	335.85	1.2	M	170.71	0.2	M	203.89	0.4	H	273.07	0.8	M	242.12	0.7	M	241.17	0.7	H	307.88	1.0	M	169.77	0.2	M	188.23	0.3	M	151.44	0
ENSOCUG00000012338	DDX3X	H	2617.39	1.1	H	2108.3	0.8	H	2032.23	0.8	H	2500.67	1.1	M	1979.58	0.7	M	1363.85	0.2	M	1687.07	0.5	M	1621.16	0.4	M	1702.01	0.5	M	1189.85	0
ENSOCUG00000013069	ELOVL6	H	6.3	0.9	H	11.5	1.7	H	20.72	2.6	H	14.57	2.1	H	14.79	2.1	H	14.23	2.0	M	4.95	0.4	H	14.14	2.0	H	11.69	1.8	M	3.38	0
ENSOCUG00000013427	DPEP2	H	29.34	1.7	H	18.61	1.1	H	23.52	1.4	H	17.73	1.0	M	14.67	0.7	H	23.65	1.4	H	15.25	0.8	M	12.87	0.6	M	11.48	0.4	M	9.01	0
ENSOCUG00000013450	MYH11	H	299.88	0.8	M	253.96	0.5	H	337.66	0.9	H	324.81	0.9	M	216.23	0.3	H	514.15	1.5	H	299.11	0.8	H	333.53	0.9	H	297.12	0.8	M	176.82	0
ENSOCUG00000013715	C5orf34	H	41.36	1.4	M	15.79	0.0	M	25.02	0.7	M	20.73	0.5	M	19.77	0.3	H	30.76	1.0	H	29.02	0.9	M	20.06	0.3	M	22.33	0.5	M	15.32	0
ENSOCUG00000013904	CISH	H	148.15	2.2	H	582.71	4.1	H	149.13	2.2	H	132.91	2.0	H	89.59	1.4	H	163.09	2.3	M	44.19	0.4	H	158.55	2.3	H	117.87	1.8	M	33.65	0
ENSOCUG00000013960	DMGDH	H	20.92	1.3	M	7.98	-0.1	H	20.22	1.2	M	9.36	0.1	M	8.12	-0.0	M	9.54	0.2	M	4.77	-0.8	M	5.88	-0.5	M	8.88	0.0	M	8.79	0
ENSOCUG00000014356	E2F3	H	143.22	0.8	H	144.12	0.9	H	134.35	0.8	H	166.74	1.1	H	151.82	0.9	M	120.87	0.6	M	83.39	0.1	M	132.26	0.7	M	131.59	0.7	M	78.84	0
ENSOCUG00000015121	LRRC4	H	40.42	1.2	H	45.13	1.3	M	20.31	0.2	H	80.44	2.1	M	30.14	0.7	H	47.97	1.4	H	82.53	2.2	H	90.86	2.3	H	31.48	0.8	M	18.1	0
ENSOCUG00000015193	SLC45A4	H	27.55	0.9	M	17.77	0.3	H	30.55	1.0	H	28.32	1.0	M	22.41	0.6	H	25.08	0.8	H	42.65	1.5	H	27.65	0.9	M	22.9	0.7	M	14.67	0
ENSOCUG00000015248	SHISA2	H	145.39	0.9	H	210.12	1.4	H	136.0	0.8	H	171.45	1.1	H	177.29	1.2	M	99.78	0.4	M	58.12	-0.4	H	260.8	1.7	H	305.29	2.0	M	77.73	0
ENSOCUG00000015275	ENSOCUG00000015275	H	82.65	1.2	H	67.66	0.9	M	27.83	-0.3	H	62.94	0.8	M	38.24	0.1	H	64.5	0.9	M	36.75	0.1	M	34.88	-0.0	H	91.58	1.4	M	35.14	0
ENSOCUG00000015462	PRRG1	H	534.3	0.8	M	456.69	0.6	M	424.61	0.5	M	443.52	0.5	H	659.14	1.1	M	391.65	0.4	H	625.45	1.0	H	654.3	1.1	H	588.13	1.0	M	303.68	0
ENSOCUG00000015538	ENSOCUG00000015538	H	17.0	1.0	H	19.57	1.2	H	16.58	0.9	H	18.29	1.1	H	28.5	1.7	H	19.36	1.2	M	11.14	0.4	H	18.9	1.1	H	21.42	1.3	M	8.47	0
ENSOCUG00000015724	SOCS7	H	156.04	0.8	M	122.52	0.4	H	162.68	0.9	H	186.44	1.0	H	156.47	0.8	H	172.3	0.9	M	138.98	0.6	H	167.05	0.9	M	118.61	0.4	M	89.78	0
ENSOCUG00000015898	SERINC2	H	580.4	0.8	M	539.68	0.7	M	507.07	0.6	H	678.59	1.0	M	416.52	0.3	M	404.2	0.3	M	525.35	0.6	M	335.6	-0.0	M	409.62	0.3	M	338.52	0
ENSOCUG00000016014	NPFFR1	H	29.55	1.1	M	12.88	-0.1	M	16.39	0.3	H	27.68	1.1	M	14.53	0.1	M	17.28	0.4	M	19.98	0.6	M	11.96	-0.1	M	15.99	0.3	M	13.02	0
ENSOCUG00000016105	COLQ	H	83.42	0.8	M	44.6	-0.2	M	60.66	0.3	M	38.75	-0.4	M	42.57	-0.2	H	125.53	1.3	M	27.79	-0.8	M	37.62	-0.4	M	32.06	-0.6	M	49.71	0
ENSOCUG00000016890	PLVAP	H	137.64	1.4	M	51.18	0.0	H	89.77	0.8	H	187.91	1.9	H	132.96	1.4	H	90.69	0.8	H	111.86	1.1	M	73.94	0.5	H	148.43	1.5	M	51.5	0
ENSOCUG00000016960	ENSOCUG00000016960	H	28.78	0.9	H	35.35	1.2	M	23.67	0.6	M	22.95	0.6	M	23.77	0.7	H	36.22	1.2	M	15.22	0.0	H	46.94	1.6	M	24.91	0.7	M	15.4	0
ENSOCUG00000017707	P4HTM	H	27.02	1.1	M	13.16	0.1	M	18.7	0.6	M	16.49	0.4	M	18.01	0.6	H	31.81	1.4	H	22.69	0.9	M	16.6	0.5	M	16.69	0.5	M	12.09	0
ENSOCUG00000017934	ACVR1B	H	145.36	1.0	H	148.08	1.0	H	156.13	1.1	H	145.64	1.0	H	121.99	0.8	H	127.89	0.8	M	91.21	0.3	M	119.39	0.7	M	114.8	0.7	M	71.72	0
ENSOCUG00000017943	LCP1	H	18.73	1.0	M	13.81	0.5	H	19.79	1.0	H	16.72	0.8	M	12.24	0.4	M	12.58	0.4	M	10.26	0.1	M	12.25	0.4	M	15.29	0.7	M	9.49	0
ENSOCUG00000017952	DSCC1	H	130.01	2.0	H	150.14	2.2	M	30.32	-0.1	H	80.39	1.3	M	24.01	-0.4	M	27.49	-0.3	M	30.22	-0.1	M	32.36	-0.0	H	87.78	1.4	M	32.67	0
ENSOCUG00000021037	ENSOCUG00000021037	H	54.76	2.3	H	21.35	1.0	M	11.14	0.0	M	10.94	0.1	M	7.84	-0.5	M	9.28	-0.2	M	11.78	0.1	H	22.07	1.0	M	15.17	0.5	M	10.93	0
ENSOCUG00000021086	ENSOCUG00000021086	H	180.26	1.0	M	148.88	0.7	M	104.56	0.2	M	125.21	0.5	M	115.08	0.4	M	125.36	0.5	H	174.94	1.0	M	148.27	0.7	M	119.9	0.4	M	89.07	0
ENSOCUG00000021619	MAFB	H	208.66	1.2	H	296.1	1.7	H	219.91	1.3	H	180.69	1.0	H	187.69	1.1	H	193.12	1.1	M	106.94	0.3	H	153.92	0.8	H	178.87	1.0	M	87.79	0
ENSOCUG00000022082	SH2B2	H	1132.68	1.2	H	1597.63	1.7	H	1112.56	1.1	H	1578.48	1.6	H	945.5	0.9	H	1119.22	1.2	M	673.44	0.4	H	1466.84	1.5	H	1101.2	1.1	M	502.24	0
ENSOCUG00000022850	ENSOCUG00000022850	H	20.34	1.1	H	19.84	1.1	H	17.51	0.9	H	23.49	1.3	H	15.69	0.8	H	26.21	1.5	H	21.39	1.2	M	10.79	0.2	H	15.71	0.8	M	9.51	0
ENSOCUG00000023198	ENSOCUG00000023198	H	41.36	1.0	M	34.76	0.7	M	30.46	0.5	M	27.0	0.4	H	37.79	0.9	H	48.64	1.2	M	28.34	0.4	H	37.02	0.8	M	30.61	0.5	M	21.02	0
ENSOCUG00000023813	NME4	H	831.7	1.9	H	890.91	2.0	H	785.77	1.8	M	170.03	-0.4	H	714.13	1.7	H	837.83	1.9	M	196.89	-0.2	H	737.89	1.7	M	229.89	0.0	M	224.19	0
ENSOCUG00000024354	ENSOCUG00000024354	H	11.44	3.8	H	1.51	0.9	M	0.41	-0.8	M	0.33	-1.4	H	9.67	3.6	H	12.42	3.9	M	1.03	0.3	M	0.93	0.3	H	8.82	3.5	M	0.8	0
ENSOCUG00000024620	ENSOCUG00000024620	H	28.25	1.5	H	18.95	0.9	H	21.25	1.1	M	16.82	0.7	H	18.63	0.8	M	15.66	0.6	M	14.15	0.4	M	15.0	0.6	H	20.59	1.0	M	10.0	0
ENSOCUG00000024717	ENSOCUG00000024717	H	15.26	2.2	H	11.01	1.8	H	7.91	1.3	M	4.73	0.4	H	14.4	2.2	H	11.68	1.9	M	3.28	0.0	H	17.33	2.4	H	16.84	2.4	M	3.16	0
ENSOCUG00000025635	CAMKK2	H	50.52	0.8	M	36.97	0.4	H	64.14	1.2	H	49.69	0.8	M	37.59	0.4	H	57.28	1.0	H	61.43	1.1	M	43.69	0.6	M	43.54	0.6	M	29.0	0
ENSOCUG00000026253	ENSOCUG00000026253	H	63.24	4.2	H	59.0	4.1	M	3.97	0.1	H	57.38	4.0	M	3.12	-0.2	H	55.87	4.0	H	52.14	3.9	M	4.3	0.4	M	3.0	-0.2	M	3.58	0
ENSOCUG00000026351	ENSOCUG00000026351	H	135.92	1.4	M	71.29	0.5	H	85.93	0.8	H	88.4	0.8	H	101.42	1.0	H	102.03	1.0	H	106.51	1.1	H	88.98	0.8	M	64.12	0.3	M	50.89	0
ENSOCUG00000026479	SERPING1	H	233.97	1.2	M	149.79	0.5	H	202.73	1.0	H	173.58	0.8	M	144.17	0.5	M	150.28	0.6	H	202.38	1.0	M	109.89	0.1	M	160.54	0.6	M	102.93	0
ENSOCUG00000027125	ENSOCUG00000027125	H	7.85	5.3	H	12.21	5.9	H	9.85	5.6	M	0.0	0.0	H	10.74	5.7	H	8.63	5.5	M	0.0	0.0	M	0.18	0.6	M	0.0	0.0	M	0.0	0
ENSOCUG00000027198	SLC38A4	H	297.27	1.7	H	268.96	1.5	H	185.34	1.0	H	260.18	1.5	M	97.0	0.1	H	346.86	1.9	H	534.41	2.5	H	215.4	1.2	H	336.26	1.8	M	93.73	0
ENSOCUG00000027792	TMEM52	H	274.97	1.1	M	171.4	0.4	M	131.75	0.0	M	124.08	-0.1	M	148.59	0.2	M	164.96	0.3	H	262.97	1.0	M	148.63	0.2	M	151.64	0.2	M	131.45	0
ENSOCUG00000027878	ENSOCUG00000027878	H	15.82	0.8	M	11.93	0.4	M	13.38	0.5	H	18.38	1.0	M	15.54	0.7	H	17.35	0.9	H	21.92	1.2	M	13.35	0.5	M	13.01	0.5	M	9.51	0
ENSOCUG00000027941	KCNMB4	H	30.05	1.1	H	33.28	1.2	M	22.87	0.7	M	24.14	0.7	H	39.39	1.4	M	21.28	0.6	M	16.5	0.1	H	33.47	1.2	H	36.39	1.3	M	14.77	0
ENSOCUG00000027981	ISG15	H	74.2	2.2	H	34.23	1.0	M	21.2	0.4	M	22.75	0.5	M	14.6	-0.1	H	29.06	0.8	M	16.14	-0.0	M	25.65	0.7	M	20.0	0.3	M	16.65	0
ENSOCUG00000029391	ZNF668	H	30.49	0.8	M	28.16	0.7	H	34.13	1.0	H	34.8	1.0	H	35.85	1.1	H	37.41	1.1	M	20.69	0.2	M	28.45	0.7	M	23.95	0.5	M	17.18	0
ENSOCUG00000029682	CFB	H	100.34	2.7	M	12.09	-0.3	H	36.78	1.3	M	14.1	-0.1	M	6.57	-1.1	M	10.48	-0.5	H	28.47	0.9	M	13.72	-0.1	M	12.03	-0.4	M	15.05	0
ENSOCUG00000029731	ENSOCUG00000029731	H	38.52	0.8	H	39.07	0.8	H	54.68	1.3	H	44.64	1.0	M	30.7	0.4	M	31.85	0.5	M	24.46	0.1	M	31.89	0.5	M	37.54	0.7	M	22.51	0
ENSOCUG00000031084	ENSOCUG00000031084	H	219.79	1.1	H	207.6	1.0	M	163.79	0.7	M	87.81	-0.2	M	91.92	-0.2	M	170.69	0.7	M	78.27	-0.4	H	179.81	0.8	M	161.49	0.7	M	102.3	0
ENSOCUG00000032111	ENSOCUG00000032111	H	10.97	3.8	M	1.04	0.3	H	7.57	3.3	H	7.54	3.3	H	7.46	3.2	M	0.63	-0.2	H	8.36	3.4	M	0.55	-0.2	H	8.33	3.3	M	0.87	0
ENSOCUG00000032493	ENSOCUG00000032493	H	10.21	0.8	H	13.53	1.2	H	13.4	1.2	H	15.35	1.4	H	15.69	1.4	H	17.2	1.6	M	5.61	-0.0	M	9.45	0.7	H	14.72	1.3	M	5.78	0
ENSOCUG00000034551	ENSOCUG00000034551	H	65.56	1.3	H	55.86	1.1	M	37.86	0.5	M	43.99	0.7	M	32.23	0.3	M	31.37	0.3	H	54.76	1.1	M	22.92	-0.2	M	41.62	0.7	M	26.23	0
ENSOCUG00000035524	ENSOCUG00000035524	H	147.7	1.0	M	97.69	0.4	H	199.28	1.4	M	123.65	0.7	M	116.95	0.7	H	297.78	2.0	M	109.51	0.6	M	112.39	0.6	H	140.56	0.9	M	73.98	0
ENSOCUG00000036869	SMIM41	H	30.39	0.8	H	40.49	1.2	M	30.22	0.7	H	39.58	1.1	M	24.93	0.5	H	30.91	0.8	H	30.42	0.8	M	28.73	0.7	M	24.36	0.4	M	17.76	0
ENSOCUG00000036913	ENSOCUG00000036913	H	18.23	1.1	M	12.9	0.6	H	17.11	1.0	M	11.02	0.4	H	16.43	0.9	M	10.78	0.3	M	11.32	0.4	M	6.91	-0.3	H	14.76	0.8	M	8.43	0
ENSOCUG00000039180	ENSOCUG00000039180	H	12.86	2.1	H	11.56	2.0	H	10.45	1.8	M	2.88	-0.1	M	1.83	-0.6	H	10.64	1.9	M	3.31	0.1	H	10.32	1.8	H	8.39	1.5	M	2.84	0
ENSOCUG00000039461	FAM110D	H	62.26	0.8	H	72.64	1.0	H	67.1	0.9	M	50.37	0.5	M	59.36	0.7	H	71.73	1.0	M	40.71	0.2	H	68.31	0.9	H	68.38	0.9	M	35.63	0
ENSOCUG00000039553	FPGS	H	217.36	0.8	H	221.89	0.8	H	281.95	1.1	M	197.15	0.6	H	301.45	1.2	H	247.35	1.0	M	155.94	0.3	H	247.43	0.9	H	260.39	1.0	M	128.44	0

## Sheet: L_M_Or_M_H
		mother			child_1			child_2			child_3			child_4			child_5			child_6			child_7			child_8			father
ENSEBL ID	gene_name	ASE Prediction	norm_counts	log2fc	ASE Prediction	norm_counts	log2fc	ASE Prediction	norm_counts	log2fc	ASE Prediction	norm_counts	log2fc	ASE Prediction	norm_counts	log2fc	ASE Prediction	norm_counts	log2fc	ASE Prediction	norm_counts	log2fc	ASE Prediction	norm_counts	log2fc	ASE Prediction	norm_counts	log2fc	ASE Prediction	norm_counts	log2fc
ENSOCUG00000000422	ZACN	L	4.55	-3.1	M	34.79	-0.2	M	32.79	-0.3	L	3.92	-3.4	M	40.29	-0.0	M	51.07	0.3	L	10.61	-2.0	M	45.56	0.1	L	4.33	-3.2	M	41.77	0
ENSOCUG00000000694	BDH2	L	135.33	-1.2	L	122.95	-1.4	L	109.51	-1.5	M	229.29	-0.5	M	230.63	-0.5	L	116.52	-1.4	M	296.86	-0.1	L	142.62	-1.1	L	123.28	-1.4	M	317.48	0
ENSOCUG00000000832	ABHD6	L	13.91	-0.9	M	17.03	-0.5	M	15.99	-0.6	L	14.23	-0.8	M	15.12	-0.7	M	21.26	-0.2	L	9.17	-1.4	L	14.35	-0.8	L	11.58	-1.1	M	24.84	0
ENSOCUG00000001179	ARHGEF26	L	28.56	-1.8	M	67.09	-0.5	L	46.92	-1.1	M	74.42	-0.4	M	68.37	-0.5	L	54.87	-0.8	L	49.13	-1.0	M	61.02	-0.7	M	66.85	-0.5	M	97.35	0
ENSOCUG00000001465	PAPPA	L	5.92	-3.0	L	17.55	-1.4	L	18.95	-1.3	M	28.33	-0.7	M	39.09	-0.3	L	15.29	-1.6	L	10.7	-2.1	M	29.88	-0.6	L	27.0	-0.8	M	45.44	0
ENSOCUG00000001842	MEIS1	L	67.01	-0.9	M	93.68	-0.4	L	71.45	-0.8	L	67.63	-0.9	M	76.21	-0.7	L	62.45	-1.0	M	85.22	-0.6	M	92.58	-0.4	M	94.27	-0.4	M	124.86	0
ENSOCUG00000001849	SMPX	L	922.33	-0.8	M	1029.4	-0.7	M	1311.23	-0.3	L	613.55	-1.4	M	1229.83	-0.4	M	2016.06	0.3	M	1089.77	-0.6	M	1443.05	-0.2	M	1025.91	-0.7	M	1621.66	0
ENSOCUG00000001956	C12orf4	L	103.87	-1.3	L	129.0	-1.0	L	117.13	-1.1	L	129.22	-0.9	L	136.97	-0.9	L	133.18	-0.9	M	193.02	-0.4	L	138.49	-0.9	L	140.84	-0.8	M	252.81	0
ENSOCUG00000002093	COQ7	L	151.26	-0.8	L	133.1	-1.0	M	157.33	-0.7	L	152.72	-0.8	M	176.55	-0.6	M	240.03	-0.1	L	116.17	-1.2	M	158.54	-0.7	L	142.73	-0.9	M	264.05	0
ENSOCUG00000002140	DACH1	L	8.33	-1.8	M	19.05	-0.5	M	19.53	-0.5	L	11.04	-1.4	M	23.69	-0.2	M	18.69	-0.6	M	21.6	-0.4	M	22.17	-0.3	M	22.71	-0.3	M	27.53	0
ENSOCUG00000002151	SDR39U1	L	252.7	-0.8	L	248.35	-0.9	M	295.31	-0.6	M	283.58	-0.7	L	202.28	-1.1	M	378.46	-0.2	L	220.23	-1.0	L	212.35	-1.1	M	330.38	-0.4	M	449.35	0
ENSOCUG00000002197	ITGB8	L	256.56	-0.8	L	248.5	-0.8	M	355.08	-0.3	M	370.01	-0.2	M	379.67	-0.2	L	210.07	-1.0	L	187.83	-1.2	M	384.97	-0.2	M	299.06	-0.5	M	432.43	0
ENSOCUG00000002381	ENSOCUG00000002381	L	3.59	-1.7	M	14.27	0.3	L	3.34	-1.7	M	13.36	0.2	M	12.69	0.1	L	4.49	-1.5	L	4.45	-1.4	M	15.41	0.4	L	2.89	-2.0	M	11.86	0
ENSOCUG00000002397	UBE4A	L	492.2	-1.8	L	526.13	-1.7	L	490.46	-1.8	L	497.48	-1.8	L	564.48	-1.6	L	475.57	-1.8	M	1355.17	-0.3	L	583.07	-1.5	L	593.13	-1.5	M	1684.28	0
ENSOCUG00000002492	CD36	L	296.6	-1.0	L	259.27	-1.2	M	352.7	-0.7	L	295.8	-1.0	L	323.78	-0.9	M	469.71	-0.3	M	487.4	-0.3	M	379.7	-0.6	L	310.84	-0.9	M	592.28	0
ENSOCUG00000002580	ENSOCUG00000002580	L	7.25	-1.3	L	9.3	-0.9	M	22.57	0.4	M	18.92	0.2	M	26.04	0.6	L	7.44	-1.2	L	3.18	-2.6	M	17.6	0.0	M	12.2	-0.4	M	17.06	0
ENSOCUG00000002983	ENSOCUG00000002983	L	22.75	-0.9	L	24.36	-0.8	M	29.28	-0.5	L	13.44	-1.6	L	19.7	-1.1	M	37.87	-0.2	L	22.61	-0.9	L	23.61	-0.8	L	18.15	-1.2	M	42.55	0
ENSOCUG00000003010	TXNIP	L	4407.49	-1.5	L	3423.93	-1.9	L	3524.02	-1.9	L	1656.6	-2.9	L	3304.58	-1.9	L	2220.99	-2.5	M	11390.19	-0.2	L	3582.7	-1.8	L	5543.45	-1.2	M	12729.34	0
ENSOCUG00000003071	LPIN1	L	1465.37	-1.0	L	1738.2	-0.8	M	2388.79	-0.3	M	3511.13	0.2	L	1449.73	-1.0	M	2575.72	-0.2	M	2745.25	-0.1	L	1560.64	-0.9	L	1327.57	-1.2	M	2973.85	0
ENSOCUG00000003200	VGLL2	L	1277.03	-1.2	L	1405.32	-1.1	L	1310.12	-1.2	M	1899.0	-0.7	L	1167.62	-1.4	M	2272.73	-0.4	L	1618.85	-0.9	L	1771.57	-0.8	L	1314.29	-1.2	M	3033.89	0
ENSOCUG00000003607	AIG1	L	222.96	-0.8	M	265.88	-0.6	M	265.98	-0.6	M	262.67	-0.6	M	296.13	-0.4	M	260.08	-0.6	L	193.41	-1.0	M	347.46	-0.2	M	316.67	-0.3	M	394.02	0
ENSOCUG00000003809	KLF11	L	45.08	-2.2	L	30.29	-2.8	L	67.88	-1.6	L	83.03	-1.3	L	38.18	-2.4	L	76.82	-1.4	M	200.97	-0.0	L	53.06	-2.0	L	61.36	-1.8	M	206.65	0
ENSOCUG00000003954	TMEM86A	L	8.6	-1.1	M	11.67	-0.6	M	10.96	-0.7	L	8.99	-1.0	M	12.54	-0.5	M	13.12	-0.5	M	27.56	0.6	L	10.41	-0.8	M	14.7	-0.3	M	18.22	0
ENSOCUG00000004099	GDAP1L1	L	10.29	-1.0	L	7.85	-1.3	M	19.0	-0.1	M	11.44	-0.7	L	11.35	-0.8	M	20.93	0.1	M	27.06	0.5	L	10.33	-1.0	L	8.47	-1.2	M	20.03	0
ENSOCUG00000004372	ENSOCUG00000004372	L	8.84	-1.3	M	13.22	-0.7	L	6.49	-1.7	L	4.88	-2.1	L	11.62	-0.9	M	18.66	-0.2	L	5.98	-1.9	L	6.54	-1.8	L	9.44	-1.2	M	21.93	0
ENSOCUG00000004378	ARRDC3	L	55.6	-1.2	M	98.37	-0.4	M	181.35	0.5	L	69.34	-0.8	M	158.07	0.3	L	64.07	-1.0	M	102.36	-0.3	M	165.36	0.4	M	125.56	-0.0	M	125.7	0
ENSOCUG00000004512	ENSOCUG00000004512	L	8.38	-0.8	M	10.08	-0.6	M	15.31	0.1	L	8.05	-0.9	L	8.25	-0.9	L	8.15	-0.9	M	14.02	-0.1	L	8.19	-0.8	L	6.12	-1.2	M	14.93	0
ENSOCUG00000005032	ENSOCUG00000005032	L	8.37	-3.3	M	74.32	-0.2	L	11.42	-2.9	L	16.99	-2.3	L	9.6	-3.1	L	14.1	-2.6	M	55.33	-0.6	L	11.12	-3.0	M	58.48	-0.5	M	84.21	0
ENSOCUG00000005076	ENSOCUG00000005076	L	281.81	-1.5	M	1051.59	0.4	M	1150.85	0.5	M	1268.24	0.7	M	1348.73	0.7	M	652.63	-0.3	L	384.1	-1.1	M	911.31	0.2	M	939.2	0.2	M	804.25	0
ENSOCUG00000005203	PHTF2	L	849.97	-0.8	L	626.2	-1.3	L	654.57	-1.2	L	631.55	-1.3	L	705.06	-1.1	L	649.1	-1.2	M	1125.72	-0.4	L	733.21	-1.1	L	768.21	-1.0	M	1524.2	0
ENSOCUG00000005204	RGS4	L	107.23	-1.1	M	182.02	-0.4	L	72.34	-1.7	L	131.59	-0.8	L	45.28	-2.4	L	85.46	-1.5	L	101.42	-1.2	L	113.46	-1.1	L	58.73	-2.0	M	237.24	0
ENSOCUG00000005208	ENSOCUG00000005208	L	75.76	-0.8	L	64.43	-1.1	M	107.09	-0.3	L	76.91	-0.8	L	66.7	-1.0	L	76.07	-0.8	M	94.04	-0.5	M	91.47	-0.6	L	76.83	-0.8	M	134.46	0
ENSOCUG00000005324	MAP1A	L	73.94	-1.5	L	84.57	-1.3	M	272.14	0.4	M	136.62	-0.6	L	83.62	-1.3	M	151.75	-0.4	M	156.94	-0.4	M	126.02	-0.7	M	149.9	-0.4	M	202.63	0
ENSOCUG00000005345	NCEH1	L	21.81	-1.8	L	40.11	-1.0	M	68.0	-0.2	M	48.43	-0.7	L	38.62	-1.0	L	43.17	-0.9	M	58.56	-0.4	M	49.76	-0.6	L	35.24	-1.1	M	77.57	0
ENSOCUG00000005650	FRAT1	L	5.03	-1.7	M	10.97	-0.6	M	15.49	-0.1	L	7.83	-1.1	L	9.28	-0.8	M	15.61	-0.1	M	17.84	0.1	M	12.17	-0.4	L	8.67	-0.9	M	16.79	0
ENSOCUG00000005767	HMGCS2	L	10.17	-4.2	L	53.7	-1.8	L	40.67	-2.2	L	23.06	-3.0	L	48.76	-1.9	M	123.98	-0.6	M	162.99	-0.2	M	151.81	-0.3	L	76.64	-1.3	M	185.24	0
ENSOCUG00000005975	ACTR1B	L	169.97	-1.1	M	255.15	-0.5	M	226.77	-0.7	L	177.73	-1.1	L	171.64	-1.1	M	327.42	-0.2	L	199.81	-0.9	L	175.16	-1.1	L	197.19	-0.9	M	368.54	0
ENSOCUG00000006035	ENSOCUG00000006035	L	60.31	-0.8	M	79.66	-0.4	L	22.47	-2.2	L	47.64	-1.2	L	19.81	-2.4	L	32.85	-1.7	L	40.46	-1.4	L	36.93	-1.5	L	30.94	-1.8	M	106.98	0
ENSOCUG00000006228	SUSD4	L	72.97	-1.1	M	167.42	0.1	M	142.52	-0.1	M	162.1	0.1	M	119.02	-0.4	L	82.37	-0.9	L	73.9	-1.1	M	123.58	-0.3	M	114.72	-0.4	M	153.99	0
ENSOCUG00000006248	ENSOCUG00000006248	L	47.24	-1.3	L	38.17	-1.7	L	28.12	-2.1	L	32.02	-1.9	L	34.14	-1.8	L	32.41	-1.9	M	152.87	0.3	L	33.81	-1.8	L	45.47	-1.4	M	120.68	0
ENSOCUG00000006350	SLC12A4	L	243.03	-1.4	L	356.76	-0.9	M	526.92	-0.3	M	403.66	-0.7	L	341.89	-0.9	M	510.04	-0.4	M	454.67	-0.5	L	332.3	-1.0	M	429.85	-0.6	M	651.46	0
ENSOCUG00000006678	JAM2	L	32.4	-2.6	L	87.38	-1.1	M	147.05	-0.4	L	72.93	-1.4	L	85.83	-1.2	L	80.98	-1.2	M	117.04	-0.7	L	91.46	-1.1	L	112.68	-0.8	M	192.2	0
ENSOCUG00000006839	PGBD5	L	8.81	-1.4	L	11.28	-1.0	L	12.94	-0.8	L	10.03	-1.1	M	15.3	-0.6	M	22.27	-0.0	M	23.73	0.1	M	18.83	-0.3	M	14.77	-0.6	M	22.82	0
ENSOCUG00000006971	KATNAL2	L	10.35	-1.6	L	18.97	-0.8	L	18.17	-0.8	L	14.17	-1.1	L	15.54	-1.0	M	29.2	-0.1	L	6.97	-2.2	L	17.32	-0.9	L	18.27	-0.8	M	32.21	0
ENSOCUG00000007516	PFKFB3	L	594.51	-2.7	L	394.31	-3.3	L	448.89	-3.1	L	358.02	-3.4	L	519.58	-2.9	L	271.83	-3.8	M	3637.36	-0.1	L	704.25	-2.4	L	1159.18	-1.7	M	3782.98	0
ENSOCUG00000007599	NR6A1	L	31.62	-1.1	M	43.81	-0.6	L	25.88	-1.4	L	19.83	-1.8	M	42.64	-0.7	L	27.9	-1.3	L	13.52	-2.3	L	28.26	-1.3	M	52.55	-0.4	M	68.21	0
ENSOCUG00000007669	MYO5A	L	13.93	-1.4	L	20.74	-0.9	M	29.56	-0.3	L	21.43	-0.8	M	31.44	-0.3	L	16.52	-1.2	M	31.84	-0.2	M	32.05	-0.2	M	27.77	-0.5	M	37.69	0
ENSOCUG00000007887	ABCC5	L	171.83	-0.9	L	113.08	-1.5	L	120.7	-1.4	L	81.81	-2.0	L	103.05	-1.6	L	108.67	-1.6	M	258.19	-0.3	L	89.19	-1.9	L	94.65	-1.8	M	322.18	0
ENSOCUG00000007964	TBC1D4	L	886.41	-0.8	L	681.25	-1.2	L	740.14	-1.1	L	852.6	-0.9	L	806.07	-0.9	M	930.56	-0.7	M	1846.88	0.3	L	809.14	-0.9	L	697.94	-1.1	M	1546.65	0
ENSOCUG00000007999	DUSP1	L	149.61	-1.0	M	893.86	1.6	M	603.74	1.0	M	293.94	-0.0	M	447.27	0.6	M	433.9	0.6	L	102.44	-1.5	M	289.39	-0.0	M	438.69	0.6	M	295.49	0
ENSOCUG00000008515	PLA2G15	L	181.48	-0.9	L	197.29	-0.8	L	137.12	-1.3	L	140.68	-1.3	L	124.06	-1.5	L	145.49	-1.3	M	276.08	-0.3	L	142.72	-1.3	L	200.12	-0.8	M	345.42	0
ENSOCUG00000008560	ENSOCUG00000008560	L	110.51	-1.0	M	165.54	-0.4	L	102.19	-1.1	M	339.3	0.6	M	203.61	-0.1	M	139.0	-0.6	L	39.75	-2.5	L	106.66	-1.0	M	207.78	-0.1	M	219.17	0
ENSOCUG00000008702	GSTO1	L	208.84	-1.2	L	233.63	-1.1	M	344.49	-0.5	M	303.62	-0.7	M	382.37	-0.4	M	372.23	-0.4	M	374.08	-0.4	M	325.98	-0.6	L	275.94	-0.8	M	488.53	0
ENSOCUG00000009056	PDILT	L	1.15	-5.0	M	27.49	-0.5	L	7.43	-2.3	L	14.16	-1.4	M	29.43	-0.4	M	49.44	0.4	L	2.23	-4.0	M	63.41	0.8	M	37.77	0.0	M	38.02	0
ENSOCUG00000009279	ABCA1	L	134.55	-1.6	L	210.61	-1.0	L	188.62	-1.1	L	159.2	-1.4	L	203.39	-1.0	L	133.18	-1.6	M	359.64	-0.2	L	221.37	-0.9	M	279.82	-0.5	M	406.91	0
ENSOCUG00000009515	POPDC2	L	405.97	-0.8	M	467.91	-0.6	L	321.79	-1.2	L	401.12	-0.8	L	358.63	-1.0	L	248.36	-1.5	M	522.97	-0.4	M	434.29	-0.7	M	430.15	-0.7	M	712.53	0
ENSOCUG00000009645	ENSOCUG00000009645	L	513.09	-1.0	M	711.78	-0.5	L	518.67	-1.0	L	412.05	-1.3	L	591.33	-0.8	L	486.97	-1.1	M	649.65	-0.7	M	626.45	-0.7	M	815.53	-0.3	M	1031.33	0
ENSOCUG00000009724	FAIM	L	15.54	-1.4	L	23.0	-0.9	M	28.5	-0.5	L	21.51	-1.0	M	32.61	-0.4	M	26.09	-0.7	L	21.49	-1.0	M	29.53	-0.5	M	27.35	-0.6	M	42.25	0
ENSOCUG00000010214	ENSOCUG00000010214	L	307.66	-0.8	M	417.42	-0.4	L	263.62	-1.1	M	416.04	-0.4	L	296.46	-0.9	M	355.9	-0.6	M	413.2	-0.4	L	312.92	-0.8	M	492.12	-0.2	M	551.86	0
ENSOCUG00000010654	ARHGAP24	L	54.3	-2.2	M	232.14	-0.1	M	293.22	0.2	M	268.91	0.1	M	215.11	-0.3	M	272.43	0.1	L	127.71	-1.0	M	250.15	-0.0	M	201.97	-0.4	M	256.96	0
ENSOCUG00000010706	FOSL2	L	41.28	-1.7	L	80.38	-0.8	M	130.6	-0.1	L	75.71	-0.9	L	79.42	-0.8	L	55.91	-1.3	L	74.34	-0.9	L	60.97	-1.2	L	58.86	-1.2	M	136.68	0
ENSOCUG00000010759	LRRC38	L	38.89	-1.0	L	46.93	-0.8	M	52.55	-0.6	M	54.36	-0.5	L	22.18	-1.8	M	94.92	0.3	L	34.33	-1.2	L	42.42	-0.9	L	30.54	-1.4	M	79.36	0
ENSOCUG00000010948	ARMCX5	L	9.6	-1.4	M	15.71	-0.7	L	12.99	-0.9	M	17.1	-0.6	L	13.05	-1.0	M	15.64	-0.7	M	26.64	0.0	L	13.82	-0.9	M	15.81	-0.7	M	25.51	0
ENSOCUG00000011211	CKMT2	L	7611.92	-0.8	M	9743.2	-0.4	M	7820.97	-0.7	M	9497.19	-0.5	M	8202.93	-0.7	M	9331.59	-0.5	L	5468.01	-1.3	M	9349.41	-0.5	L	7657.67	-0.8	M	13126.18	0
ENSOCUG00000011594	PLA2G2D	L	7.86	-1.6	M	24.1	-0.0	M	28.29	0.2	L	14.12	-0.8	M	24.35	0.0	M	27.39	0.2	L	7.11	-1.9	M	22.62	-0.1	M	33.06	0.4	M	24.37	0
ENSOCUG00000011779	TNFRSF19	L	188.92	-1.2	L	147.54	-1.6	L	137.19	-1.7	L	87.53	-2.3	L	116.47	-1.9	L	110.95	-2.0	M	373.85	-0.2	L	133.54	-1.7	L	178.71	-1.3	M	442.63	0
ENSOCUG00000012032	ENSOCUG00000012032	L	5.12	-1.5	M	9.54	-0.6	M	13.14	-0.1	L	6.89	-1.1	M	16.52	0.2	M	19.75	0.4	M	10.65	-0.5	M	17.38	0.3	M	9.66	-0.6	M	14.71	0
ENSOCUG00000012258	PALMD	L	546.25	-1.3	L	666.46	-1.0	M	873.04	-0.6	L	639.03	-1.0	M	948.4	-0.5	M	833.31	-0.6	M	952.41	-0.5	M	1274.0	-0.0	M	907.56	-0.5	M	1302.6	0
ENSOCUG00000012330	WARS2	L	11.73	-1.2	M	15.62	-0.7	M	18.09	-0.6	M	16.53	-0.7	M	17.33	-0.6	L	12.79	-1.0	M	15.45	-0.7	M	19.46	-0.4	M	15.98	-0.7	M	26.55	0
ENSOCUG00000012720	TRIM58	L	6.97	-0.8	L	5.79	-1.1	L	1.96	-2.6	M	9.46	-0.4	L	5.8	-1.1	L	3.55	-1.8	L	5.78	-1.2	L	4.3	-1.5	L	5.33	-1.2	M	12.42	0
ENSOCUG00000012754	RUBCN	L	39.46	-1.2	L	50.92	-0.8	M	84.23	-0.1	L	40.54	-1.1	M	56.73	-0.6	M	66.92	-0.4	L	42.06	-1.1	L	51.14	-0.8	L	41.96	-1.1	M	87.89	0
ENSOCUG00000013088	HAUS4	L	26.32	-1.5	L	27.35	-1.5	M	55.59	-0.4	L	42.1	-0.8	M	48.64	-0.6	M	53.41	-0.5	L	32.28	-1.3	M	51.97	-0.6	L	31.03	-1.3	M	76.76	0
ENSOCUG00000013097	C14orf93	L	42.61	-0.9	L	46.39	-0.8	L	41.39	-1.0	L	25.9	-1.7	L	35.06	-1.2	M	55.79	-0.5	M	71.36	-0.2	L	41.99	-0.9	L	35.94	-1.2	M	81.03	0
ENSOCUG00000013313	SLC30A4	L	34.66	-0.8	M	52.73	-0.2	M	53.65	-0.2	M	52.76	-0.2	M	51.8	-0.2	L	27.44	-1.2	L	26.65	-1.2	M	44.3	-0.5	L	32.73	-0.9	M	60.9	0
ENSOCUG00000013456	OMA1	L	39.83	-1.1	L	28.92	-1.5	L	30.42	-1.4	M	60.36	-0.4	L	34.95	-1.2	L	32.85	-1.3	L	29.68	-1.5	L	35.13	-1.2	M	55.11	-0.6	M	83.12	0
ENSOCUG00000013603	ALAS2	L	18.65	-1.2	M	27.55	-0.6	L	19.69	-1.1	M	39.03	-0.1	L	22.5	-0.9	L	23.62	-0.8	L	23.52	-0.8	L	15.79	-1.4	L	21.33	-1.0	M	41.21	0
ENSOCUG00000013763	DLGAP1	L	3.2	-1.9	L	4.03	-1.5	M	11.21	-0.1	M	8.96	-0.4	M	8.32	-0.5	M	8.77	-0.4	M	8.99	-0.4	M	9.94	-0.3	L	6.6	-0.8	M	11.75	0
ENSOCUG00000013969	BLM	L	10.64	-1.0	L	10.07	-1.1	M	15.93	-0.4	M	16.3	-0.4	L	11.99	-0.9	M	16.84	-0.3	L	8.19	-1.4	L	11.58	-0.9	M	13.24	-0.7	M	21.51	0
ENSOCUG00000013987	FGF1	L	43.38	-1.2	M	73.77	-0.4	L	47.28	-1.1	M	60.41	-0.7	L	37.73	-1.3	M	58.54	-0.7	L	48.22	-1.0	L	51.97	-0.9	M	67.81	-0.5	M	96.81	0
ENSOCUG00000014089	PLD1	L	12.27	-2.7	M	59.02	-0.4	M	79.83	0.0	M	51.62	-0.6	M	68.15	-0.2	M	53.27	-0.6	L	26.26	-1.6	M	77.04	-0.0	M	59.58	-0.4	M	78.57	0
ENSOCUG00000014246	SORD	L	12.98	-1.4	M	25.15	-0.4	M	23.51	-0.5	L	16.84	-1.0	L	18.86	-0.9	M	27.12	-0.3	M	34.02	0.1	M	29.85	-0.2	M	25.49	-0.4	M	33.15	0
ENSOCUG00000014442	H1-4	L	10.44	-1.1	M	16.85	-0.4	L	12.28	-0.9	L	11.59	-1.0	M	21.88	-0.0	L	9.69	-1.3	M	16.1	-0.5	M	16.37	-0.5	L	13.38	-0.8	M	22.71	0
ENSOCUG00000014602	ITGB5	L	164.51	-0.9	M	186.53	-0.7	M	190.55	-0.7	M	203.73	-0.6	L	152.24	-1.0	M	219.17	-0.5	M	254.75	-0.3	L	150.96	-1.0	L	171.5	-0.9	M	311.44	0
ENSOCUG00000015027	TMEM266	L	59.47	-1.4	M	94.07	-0.7	M	106.79	-0.5	L	44.36	-1.8	M	109.42	-0.5	M	120.66	-0.4	L	73.82	-1.1	M	116.12	-0.4	M	100.78	-0.6	M	154.33	0
ENSOCUG00000015092	C4orf33	L	5.18	-1.4	M	12.4	-0.2	M	8.26	-0.7	M	12.86	-0.1	L	5.46	-1.4	L	7.69	-0.8	M	11.62	-0.2	M	8.71	-0.6	M	8.6	-0.7	M	13.64	0
ENSOCUG00000015423	ZDHHC23	L	7.23	-0.8	L	3.06	-2.1	L	2.53	-2.3	L	0.94	-3.7	L	1.32	-3.5	L	0.69	-4.2	M	12.1	-0.1	L	0.82	-4.1	L	1.94	-2.8	M	12.66	0
ENSOCUG00000015622	METTL7A	L	336.11	-0.8	M	432.83	-0.5	M	397.95	-0.6	L	206.83	-1.5	M	592.36	-0.0	L	173.67	-1.8	L	169.23	-1.8	M	440.85	-0.4	M	486.97	-0.3	M	597.91	0
ENSOCUG00000016141	KLF10	L	371.31	-1.3	L	407.61	-1.2	L	266.15	-1.8	L	239.02	-1.9	L	289.77	-1.7	L	216.49	-2.1	M	758.48	-0.3	L	224.64	-2.0	L	320.09	-1.5	M	910.92	0
ENSOCUG00000016210	REP15	L	2.7	-2.6	M	23.06	0.5	M	20.67	0.3	M	19.11	0.2	M	21.99	0.4	M	17.9	0.1	M	12.09	-0.5	M	24.72	0.6	L	8.34	-1.0	M	16.78	0
ENSOCUG00000016223	ENSOCUG00000016223	L	507.26	-0.8	L	325.13	-1.4	L	412.62	-1.1	L	485.85	-0.8	L	358.13	-1.3	M	536.08	-0.7	M	1166.05	0.4	L	342.69	-1.3	L	361.28	-1.3	M	867.75	0
ENSOCUG00000016228	MANSC4	L	2.34	-2.1	M	7.66	-0.4	M	8.03	-0.3	M	9.85	-0.0	M	9.3	-0.1	M	13.4	0.5	M	6.8	-0.5	M	8.27	-0.2	L	3.81	-1.3	M	9.67	0
ENSOCUG00000016464	ENSOCUG00000016464	L	9.44	-1.1	M	13.45	-0.6	M	14.61	-0.4	M	13.19	-0.6	M	16.27	-0.3	L	8.69	-1.2	M	15.42	-0.3	L	11.44	-0.8	M	13.68	-0.5	M	19.98	0
ENSOCUG00000016478	RAD54B	L	50.61	-1.0	M	94.15	-0.2	L	50.89	-1.0	M	88.43	-0.2	M	86.47	-0.3	M	64.51	-0.7	L	55.17	-0.9	L	57.83	-0.8	M	115.1	0.1	M	104.83	0
ENSOCUG00000016916	CEP85	L	1137.8	-0.9	M	1400.11	-0.6	L	940.35	-1.1	L	935.21	-1.1	L	1095.15	-0.9	L	934.99	-1.1	L	1217.82	-0.8	L	1192.3	-0.8	M	1626.35	-0.3	M	2067.81	0
ENSOCUG00000017079	SNX29	L	51.57	-0.9	L	57.27	-0.8	M	95.34	-0.0	M	67.1	-0.5	L	47.45	-1.0	M	116.97	0.3	M	70.13	-0.5	L	54.79	-0.8	M	65.79	-0.6	M	97.6	0
ENSOCUG00000017455	ASB8	L	1767.12	-0.9	M	2401.41	-0.4	M	2102.46	-0.6	L	1482.38	-1.1	M	2176.69	-0.6	L	1365.32	-1.2	M	2183.54	-0.6	M	2097.22	-0.6	L	1298.51	-1.3	M	3225.89	0
ENSOCUG00000017546	ENSOCUG00000017546	L	55.44	-0.9	M	98.03	-0.1	L	51.94	-1.0	L	45.63	-1.2	M	65.54	-0.7	L	52.43	-1.0	M	138.54	0.4	L	46.74	-1.2	M	81.2	-0.4	M	106.07	0
ENSOCUG00000017756	C3orf33	L	8.12	-1.3	M	15.5	-0.4	M	16.49	-0.2	M	15.62	-0.3	M	18.34	-0.1	M	24.05	0.3	L	9.1	-1.1	M	13.08	-0.6	M	22.62	0.2	M	20.45	0
ENSOCUG00000017835	DNMT3B	L	0.83	-4.4	L	8.78	-0.9	M	12.67	-0.4	M	14.6	-0.2	L	8.19	-1.1	M	14.46	-0.2	M	12.88	-0.4	M	10.46	-0.7	M	9.96	-0.7	M	16.5	0
ENSOCUG00000017956	ABCC1	L	919.29	-0.8	M	1081.85	-0.6	L	881.62	-0.9	M	1023.26	-0.7	L	791.88	-1.0	L	800.56	-1.0	M	1244.06	-0.4	L	933.47	-0.8	M	1052.82	-0.6	M	1622.59	0
ENSOCUG00000021270	PARP3	L	29.65	-1.5	L	45.18	-0.9	L	49.55	-0.8	L	34.83	-1.3	L	29.26	-1.5	M	65.58	-0.4	L	41.15	-1.0	L	26.97	-1.6	L	31.37	-1.4	M	84.13	0
ENSOCUG00000021344	ENSOCUG00000021344	L	61.85	-0.8	M	86.45	-0.3	M	86.37	-0.3	M	120.54	0.1	M	66.61	-0.7	L	50.93	-1.1	L	53.46	-1.0	M	70.26	-0.6	L	64.68	-0.8	M	109.65	0
ENSOCUG00000022282	EDA2R	L	67.64	-0.9	L	42.2	-1.6	M	80.53	-0.7	L	61.44	-1.0	L	52.54	-1.3	M	85.39	-0.6	M	110.0	-0.2	L	54.22	-1.2	L	75.46	-0.8	M	127.35	0
ENSOCUG00000022543	ENSOCUG00000022543	L	33.94	-1.0	L	27.67	-1.3	L	26.26	-1.3	L	24.26	-1.4	L	28.98	-1.2	L	36.5	-0.9	M	66.46	-0.0	L	25.04	-1.4	L	23.09	-1.5	M	66.69	0
ENSOCUG00000022889	ENSOCUG00000022889	L	4.96	-1.0	M	8.49	-0.2	L	4.45	-1.2	L	5.64	-0.9	M	9.34	-0.0	M	6.08	-0.7	L	1.45	-2.7	M	8.73	-0.2	M	5.98	-0.7	M	9.92	0
ENSOCUG00000022925	ENSOCUG00000022925	L	128.37	-0.8	M	153.55	-0.5	M	135.32	-0.7	M	138.09	-0.7	M	166.75	-0.4	L	5.75	-5.2	M	137.88	-0.7	M	166.9	-0.4	M	172.77	-0.4	M	222.94	0
ENSOCUG00000023102	ENSOCUG00000023102	L	158.49	-0.8	L	152.93	-0.8	M	163.42	-0.7	L	123.72	-1.1	M	266.54	0.0	M	222.27	-0.3	M	229.32	-0.2	M	212.09	-0.3	M	158.29	-0.7	M	266.42	0
ENSOCUG00000023184	TAS1R1	L	14.67	-0.8	L	12.57	-1.0	L	8.37	-1.6	L	13.41	-1.0	L	12.81	-1.0	L	11.27	-1.1	M	18.83	-0.4	L	9.1	-1.5	L	8.07	-1.6	M	25.42	0
ENSOCUG00000023408	CITED2	L	209.12	-1.6	L	198.13	-1.6	L	186.56	-1.7	L	201.06	-1.6	L	199.19	-1.6	L	207.54	-1.6	M	475.33	-0.4	L	159.1	-1.9	L	260.48	-1.2	M	612.44	0
ENSOCUG00000023535	ENSOCUG00000023535	L	43.93	-1.1	M	91.38	-0.1	L	54.23	-0.8	L	44.23	-1.1	M	74.57	-0.4	M	69.71	-0.5	L	25.31	-1.9	L	36.84	-1.4	L	33.94	-1.5	M	95.02	0
ENSOCUG00000023673	ENSOCUG00000023673	L	22.72	-1.2	M	36.61	-0.5	L	24.32	-1.1	L	19.56	-1.4	M	45.95	-0.1	L	23.92	-1.1	L	18.19	-1.5	M	44.94	-0.2	M	34.28	-0.6	M	50.38	0
ENSOCUG00000023717	CNKSR1	L	84.19	-1.7	L	106.1	-1.3	L	147.69	-0.9	L	159.87	-0.8	L	122.71	-1.1	M	233.34	-0.2	L	159.17	-0.8	L	117.49	-1.2	L	137.76	-1.0	M	269.99	0
ENSOCUG00000025663	ENSOCUG00000025663	L	40.13	-1.1	L	28.71	-1.6	M	70.54	-0.3	M	62.13	-0.5	L	49.93	-0.8	M	72.29	-0.3	M	120.03	0.5	L	38.23	-1.2	L	34.55	-1.3	M	86.76	0
ENSOCUG00000025890	ENSOCUG00000025890	L	25.28	-0.9	L	23.81	-1.0	L	15.12	-1.6	L	20.73	-1.2	L	23.09	-1.0	L	26.69	-0.8	M	36.74	-0.4	L	12.84	-1.9	L	15.79	-1.6	M	48.07	0
ENSOCUG00000025982	ENSOCUG00000025982	L	10016.4	-1.0	M	13515.15	-0.5	M	14327.24	-0.5	M	14021.1	-0.5	M	12297.4	-0.7	M	12056.34	-0.7	L	10530.19	-0.9	M	16768.42	-0.2	L	9751.24	-1.0	M	19776.79	0
ENSOCUG00000026398	ENSOCUG00000026398	L	1097.56	-0.8	L	632.53	-1.6	L	655.0	-1.6	L	738.38	-1.4	L	885.31	-1.2	L	920.99	-1.1	M	1586.47	-0.3	L	988.58	-1.0	L	1040.6	-0.9	M	1973.94	0
ENSOCUG00000026751	PLBD1	L	69.72	-1.5	L	66.46	-1.6	M	135.07	-0.6	M	151.71	-0.4	L	87.14	-1.2	M	196.87	-0.0	M	177.46	-0.2	L	111.91	-0.8	L	87.91	-1.2	M	197.92	0
ENSOCUG00000027011	ENSOCUG00000027011	L	98.01	-0.9	L	47.58	-2.0	L	38.05	-2.3	L	75.31	-1.3	L	91.2	-1.0	L	102.21	-0.9	M	166.77	-0.2	L	87.28	-1.1	L	101.22	-0.9	M	186.41	0
ENSOCUG00000027029	ARID5B	L	76.96	-1.6	L	66.58	-1.8	L	77.39	-1.6	L	44.72	-2.4	L	65.56	-1.8	L	121.89	-0.9	M	263.92	0.2	L	67.36	-1.8	M	149.06	-0.6	M	233.53	0
ENSOCUG00000027381	ENSOCUG00000027381	L	6.16	-1.2	L	7.54	-0.9	M	11.22	-0.3	L	7.57	-0.9	M	13.06	-0.1	L	6.59	-1.1	L	8.24	-0.8	M	8.44	-0.7	L	5.95	-1.2	M	14.28	0
ENSOCUG00000027409	ENSOCUG00000027409	L	167.6	-1.3	M	319.47	-0.4	M	327.55	-0.4	M	319.19	-0.4	M	286.01	-0.6	L	222.86	-0.9	L	240.98	-0.8	L	197.94	-1.1	L	250.16	-0.8	M	422.6	0
ENSOCUG00000027493	APMAP	L	125.37	-1.1	L	124.51	-1.1	M	190.97	-0.4	M	203.81	-0.4	L	138.82	-0.9	M	200.18	-0.4	M	163.66	-0.7	L	116.23	-1.2	L	109.92	-1.2	M	260.88	0
ENSOCUG00000029235	ENSOCUG00000029235	L	20.64	-1.4	L	20.46	-1.4	M	33.55	-0.7	L	28.59	-0.9	L	27.59	-1.0	M	33.58	-0.7	M	42.77	-0.3	M	31.93	-0.7	L	21.33	-1.3	M	54.57	0
ENSOCUG00000029357	ENSOCUG00000029357	L	195.68	-2.7	L	179.75	-2.9	L	153.21	-3.1	M	1049.14	-0.3	M	1148.09	-0.2	L	225.37	-2.5	M	1194.85	-0.1	L	182.44	-2.8	L	176.98	-2.9	M	1310.21	0
ENSOCUG00000029385	ENSOCUG00000029385	L	42.37	-1.6	L	40.56	-1.7	M	115.9	-0.2	L	53.32	-1.3	M	95.54	-0.5	L	58.96	-1.2	M	87.35	-0.6	L	70.03	-0.9	L	67.22	-1.0	M	130.84	0
ENSOCUG00000029709	AKR7A3	L	5.02	-1.7	M	10.42	-0.7	L	9.31	-0.9	M	13.86	-0.3	L	7.93	-1.1	M	11.58	-0.5	M	13.4	-0.3	L	7.24	-1.2	L	9.55	-0.8	M	16.71	0
ENSOCUG00000032372	ENSOCUG00000032372	L	302.74	-1.6	L	404.79	-1.2	L	352.87	-1.4	L	313.72	-1.6	L	286.45	-1.7	L	259.31	-1.8	M	825.49	-0.2	L	424.76	-1.1	L	390.81	-1.2	M	922.66	0
ENSOCUG00000033152	ENSOCUG00000033152	L	58072.18	-1.0	M	78228.28	-0.6	M	75845.4	-0.7	M	82034.8	-0.6	L	61426.74	-1.0	L	66465.92	-0.9	L	65377.03	-0.9	M	91546.38	-0.4	L	51791.26	-1.2	M	120137.81	0
ENSOCUG00000034665	ENSOCUG00000034665	L	20976.6	-1.0	M	29116.91	-0.6	M	26728.47	-0.7	M	29462.87	-0.5	L	21583.87	-1.0	L	22897.58	-0.9	L	24162.55	-0.8	M	35631.34	-0.3	L	18845.65	-1.2	M	42867.25	0
ENSOCUG00000034762	ENSOCUG00000034762	L	6.58	-2.4	L	20.46	-0.8	M	21.84	-0.7	M	20.85	-0.7	L	1.22	-4.7	M	22.44	-0.6	M	28.36	-0.3	M	21.45	-0.7	L	0.78	-5.3	M	34.59	0
ENSOCUG00000036082	ENSOCUG00000036082	L	8.54	-1.6	M	33.23	0.4	M	24.88	-0.0	M	34.56	0.4	L	6.39	-2.0	M	79.92	1.6	M	34.56	0.4	L	7.05	-1.9	L	9.63	-1.4	M	26.07	0
ENSOCUG00000037340	ENSOCUG00000037340	L	10.82	-1.0	M	14.97	-0.5	L	8.23	-1.3	L	9.78	-1.1	L	12.19	-0.8	L	12.29	-0.8	M	13.53	-0.6	M	17.46	-0.3	L	12.66	-0.8	M	21.28	0
ENSOCUG00000038615	ENSOCUG00000038615	L	7.72	-1.1	M	12.48	-0.4	M	14.86	-0.1	L	7.19	-1.2	M	11.27	-0.5	M	15.94	-0.0	L	7.41	-1.1	M	9.73	-0.7	L	8.83	-0.9	M	16.13	0

## Sheet: M_M
		mother			child_1			child_2			child_3			child_4			child_5			child_6			child_7			child_8			father
ENSEBL ID	gene_name	ASE Prediction	norm_counts	log2fc	ASE Prediction	norm_counts	log2fc	ASE Prediction	norm_counts	log2fc	ASE Prediction	norm_counts	log2fc	ASE Prediction	norm_counts	log2fc	ASE Prediction	norm_counts	log2fc	ASE Prediction	norm_counts	log2fc	ASE Prediction	norm_counts	log2fc	ASE Prediction	norm_counts	log2fc	ASE Prediction	norm_counts	log2fc
ENSOCUG00000000016	ENSOCUG00000000016	M	11.28	0.3	M	13.29	0.6	M	14.92	0.7	H	18.85	1.1	H	16.68	0.9	M	13.06	0.5	M	12.34	0.4	H	16.35	0.8	M	15.28	0.7	M	9.1	0
ENSOCUG00000000023	PKP2	M	52.69	0.3	L	25.89	-0.8	L	24.98	-0.8	M	26.65	-0.7	L	16.79	-1.4	L	17.33	-1.3	M	49.49	0.2	L	21.75	-1.0	L	17.78	-1.3	M	43.89	0
ENSOCUG00000000038	CREBRF	M	34.79	-0.3	M	27.89	-0.6	L	22.6	-0.9	L	19.75	-1.1	L	20.58	-1.1	L	16.26	-1.4	M	46.03	0.1	M	27.6	-0.6	M	31.17	-0.4	M	41.61	0
ENSOCUG00000000080	PLEKHA2	M	19.69	-0.2	M	34.48	0.6	H	45.25	1.0	H	38.34	0.8	M	33.29	0.6	H	41.21	0.9	M	35.65	0.6	M	29.3	0.4	M	34.49	0.6	M	22.31	0
ENSOCUG00000000090	WDR81	M	307.21	-0.1	M	213.24	-0.6	M	197.05	-0.7	L	198.78	-0.8	L	142.9	-1.2	M	206.76	-0.7	M	310.1	-0.1	L	184.71	-0.8	M	214.04	-0.6	M	329.63	0
ENSOCUG00000000101	ENSOCUG00000000101	M	126.42	-0.4	M	149.64	-0.2	M	106.2	-0.7	M	118.79	-0.5	M	156.25	-0.1	L	70.06	-1.3	M	176.48	0.0	M	166.29	-0.0	M	105.25	-0.7	M	169.98	0
ENSOCUG00000000108	ARL4A	M	236.09	0.2	L	80.63	-1.4	L	118.86	-0.8	L	100.11	-1.1	L	113.73	-0.9	M	139.41	-0.6	H	392.82	0.9	M	133.11	-0.7	M	190.1	-0.2	M	212.99	0
ENSOCUG00000000121	LRR1	M	10.67	-0.2	M	8.73	-0.5	M	13.42	0.1	M	8.78	-0.5	M	9.78	-0.3	M	9.14	-0.4	M	9.46	-0.4	M	8.5	-0.5	L	5.63	-1.1	M	12.48	0
ENSOCUG00000000145	NFIL3	M	458.93	0.4	L	117.72	-1.6	L	80.65	-2.1	L	121.64	-1.5	L	102.27	-1.8	L	118.13	-1.6	M	366.78	0.1	L	120.94	-1.5	L	138.96	-1.3	M	349.08	0
ENSOCUG00000000166	LYRM7	M	137.26	-0.2	M	141.68	-0.1	L	60.76	-1.3	M	172.27	0.2	M	175.81	0.2	L	87.4	-0.8	M	159.78	0.0	M	227.18	0.5	M	181.73	0.2	M	156.12	0
ENSOCUG00000000171	GREM2	M	49.77	0.1	H	111.52	1.3	M	67.24	0.6	H	103.5	1.2	H	96.0	1.1	H	110.39	1.3	M	52.66	0.2	H	104.08	1.2	H	85.46	0.9	M	45.25	0
ENSOCUG00000000242	ASB10	M	1345.39	0.2	M	972.54	-0.3	L	543.11	-1.1	M	780.98	-0.6	L	696.27	-0.8	M	836.59	-0.5	M	726.59	-0.7	L	536.01	-1.1	M	777.65	-0.6	M	1182.93	0
ENSOCUG00000000300	MCM7	M	242.95	-0.2	L	154.64	-0.9	L	140.7	-1.0	L	156.73	-0.9	L	141.97	-1.0	L	161.06	-0.8	M	261.96	-0.1	L	148.27	-0.9	L	159.36	-0.8	M	284.44	0
ENSOCUG00000000440	CYP7B1	M	22.66	-0.4	M	45.97	0.6	M	39.52	0.4	M	40.52	0.5	H	50.1	0.8	M	31.24	0.1	H	63.24	1.1	M	34.49	0.2	H	52.48	0.8	M	29.7	0
ENSOCUG00000000459	ENSOCUG00000000459	M	156.04	0.2	M	101.52	-0.4	M	107.56	-0.3	M	113.35	-0.2	M	82.31	-0.7	L	59.39	-1.2	M	82.7	-0.7	L	72.03	-0.9	L	77.64	-0.8	M	133.95	0
ENSOCUG00000000476	FGF2	M	13.39	-0.1	M	10.64	-0.4	L	7.05	-1.0	M	8.69	-0.7	M	9.91	-0.6	L	2.82	-2.3	L	6.23	-1.2	M	9.69	-0.6	L	6.43	-1.1	M	14.46	0
ENSOCUG00000000531	ENSOCUG00000000531	M	56.97	-0.4	H	143.92	1.0	H	125.41	0.8	M	98.41	0.4	H	128.91	0.8	H	126.57	0.8	H	251.33	1.8	H	163.25	1.1	H	191.83	1.4	M	74.18	0
ENSOCUG00000000574	PLEKHH1	M	22.54	0.4	H	97.37	2.5	H	103.12	2.5	H	110.36	2.6	H	59.87	1.8	H	61.56	1.8	M	22.57	0.4	H	110.23	2.6	H	91.16	2.4	M	17.74	0
ENSOCUG00000000585	RRAD	M	482.37	-0.1	M	460.78	-0.1	M	353.44	-0.5	M	358.74	-0.5	L	222.3	-1.2	M	436.39	-0.2	L	209.11	-1.3	L	293.65	-0.8	M	441.56	-0.2	M	506.5	0
ENSOCUG00000000633	ENSOCUG00000000633	M	772.22	0.2	M	980.54	0.5	H	1425.06	1.1	M	1045.97	0.6	H	1164.77	0.8	M	919.03	0.5	M	985.62	0.6	M	707.33	0.1	M	1118.65	0.7	M	670.18	0
ENSOCUG00000000661	CCNT2	M	187.42	0.1	M	239.24	0.5	M	253.54	0.6	M	227.39	0.4	M	281.22	0.7	M	238.45	0.5	M	286.58	0.7	H	347.12	1.0	M	269.21	0.6	M	171.62	0
ENSOCUG00000000678	AOPEP	M	407.01	0.1	M	321.99	-0.2	M	326.29	-0.2	M	298.2	-0.4	L	225.65	-0.8	M	294.59	-0.4	L	167.0	-1.2	L	191.51	-1.0	M	249.67	-0.6	M	381.75	0
ENSOCUG00000000754	CYP39A1	M	5.57	-0.1	M	5.07	-0.2	H	23.67	2.0	M	6.02	0.0	M	3.75	-0.7	M	8.64	0.5	H	22.58	1.9	M	7.15	0.2	H	11.55	0.9	M	6.03	0
ENSOCUG00000000821	ENSOCUG00000000821	M	4664.25	0.1	L	2247.11	-1.0	L	2196.51	-1.0	M	3130.25	-0.5	L	1857.36	-1.3	M	2944.12	-0.6	M	5239.74	0.2	L	1579.41	-1.5	L	2077.6	-1.1	M	4486.62	0
ENSOCUG00000000907	STK35	M	20.58	0.4	M	21.65	0.5	H	32.59	1.1	H	29.37	0.9	H	30.9	1.0	H	27.81	0.8	M	20.74	0.4	M	25.02	0.7	M	24.68	0.6	M	15.6	0
ENSOCUG00000000915	DTX3	M	44.33	-0.3	M	84.79	0.6	H	123.23	1.2	M	73.2	0.4	M	79.7	0.6	H	107.75	1.0	H	120.56	1.1	M	91.0	0.7	H	112.85	1.0	M	55.34	0
ENSOCUG00000001116	TMEM187	M	64.09	0.1	L	33.93	-0.9	L	27.58	-1.1	L	29.24	-1.1	L	30.5	-1.0	L	35.4	-0.8	M	45.17	-0.4	L	23.29	-1.4	L	29.82	-1.1	M	61.66	0
ENSOCUG00000001190	GFRA2	M	9.03	-0.0	H	18.58	1.0	H	22.33	1.3	M	15.51	0.7	H	18.06	1.0	H	20.91	1.2	M	11.93	0.4	H	17.68	1.0	M	14.47	0.7	M	9.23	0
ENSOCUG00000001212	JUN	M	1491.22	-0.2	L	660.79	-1.4	L	625.38	-1.4	L	579.72	-1.6	L	687.6	-1.3	L	847.68	-1.0	M	1506.74	-0.2	L	532.06	-1.7	L	693.14	-1.3	M	1697.33	0
ENSOCUG00000001288	UBB	M	546.14	-0.3	L	349.48	-1.0	M	520.94	-0.4	L	391.81	-0.8	L	399.71	-0.8	L	310.32	-1.2	M	437.12	-0.7	M	449.7	-0.6	M	416.96	-0.7	M	690.55	0
ENSOCUG00000001324	ATP1A1	M	365.44	0.4	H	491.12	0.8	H	609.68	1.1	M	461.12	0.7	M	459.95	0.7	H	564.57	1.0	M	355.0	0.3	M	459.64	0.7	H	518.53	0.9	M	285.04	0
ENSOCUG00000001334	SLC3A2	M	658.68	0.4	M	492.88	-0.0	M	661.33	0.4	M	726.59	0.5	M	778.74	0.6	M	787.39	0.7	H	1238.75	1.3	M	641.86	0.4	M	766.61	0.6	M	496.48	0
ENSOCUG00000001454	NES	M	435.0	-0.2	M	771.31	0.7	H	1379.58	1.5	H	841.21	0.8	H	871.74	0.8	H	1099.78	1.2	M	603.05	0.3	H	987.54	1.0	H	1178.21	1.3	M	486.95	0
ENSOCUG00000001461	PLOD2	M	48.64	-0.1	M	84.53	0.7	H	140.95	1.4	M	59.27	0.2	M	80.1	0.6	H	91.8	0.8	M	76.55	0.5	H	95.0	0.8	H	101.74	0.9	M	53.54	0
ENSOCUG00000001481	RIPOR2	M	86.44	-0.2	M	62.71	-0.7	M	73.9	-0.4	L	32.42	-1.6	L	47.4	-1.1	M	98.94	-0.0	L	55.39	-0.9	L	31.99	-1.6	M	60.68	-0.7	M	99.61	0
ENSOCUG00000001499	PLEKHA4	M	27.42	-0.2	M	47.5	0.6	H	67.05	1.1	M	45.99	0.6	M	44.57	0.5	H	62.37	1.0	M	38.25	0.3	M	51.47	0.7	M	49.28	0.7	M	31.38	0
ENSOCUG00000001716	PFKFB1	M	1833.46	0.0	L	959.43	-0.9	L	719.63	-1.3	L	754.5	-1.3	M	1193.75	-0.6	M	1230.09	-0.6	M	2228.16	0.3	M	1487.59	-0.3	M	1362.8	-0.4	M	1823.15	0
ENSOCUG00000001808	SLC12A2	M	1343.99	-0.3	L	592.24	-1.5	L	426.87	-2.0	L	620.5	-1.4	L	572.74	-1.5	L	394.27	-2.1	M	1679.11	0.0	L	486.59	-1.8	L	521.64	-1.7	M	1655.26	0
ENSOCUG00000001828	CERK	M	81.96	0.0	M	116.68	0.5	H	153.44	0.9	M	108.45	0.4	M	96.64	0.3	M	134.6	0.7	H	176.77	1.1	M	108.85	0.4	M	131.56	0.7	M	81.57	0
ENSOCUG00000001879	SPAG1	M	18.99	-0.2	L	9.85	-1.1	M	15.75	-0.4	L	12.1	-0.8	L	11.19	-0.9	M	17.18	-0.3	M	17.11	-0.3	M	14.58	-0.6	M	13.12	-0.7	M	21.91	0
ENSOCUG00000002055	ZNF827	M	18.82	-0.4	M	31.39	0.3	H	67.09	1.4	M	31.36	0.3	M	29.36	0.2	H	63.87	1.3	M	39.08	0.6	H	43.59	0.8	M	42.33	0.7	M	25.82	0
ENSOCUG00000002066	CSTPP1	M	63.69	-0.1	M	47.71	-0.5	L	39.09	-0.8	M	45.27	-0.6	M	49.81	-0.4	M	56.91	-0.2	L	28.63	-1.2	L	40.46	-0.8	L	35.01	-0.9	M	67.61	0
ENSOCUG00000002098	FCHSD1	M	14.69	-0.2	M	23.46	0.4	H	34.97	1.0	M	19.1	0.1	M	21.16	0.3	H	34.03	1.0	M	20.68	0.2	M	19.46	0.2	M	22.83	0.4	M	17.19	0
ENSOCUG00000002132	PPP1R10	M	95.35	0.3	M	112.95	0.5	M	124.05	0.6	M	88.53	0.2	H	139.11	0.8	H	185.3	1.2	H	136.24	0.8	M	109.85	0.5	M	127.12	0.7	M	79.25	0
ENSOCUG00000002323	PATZ1	M	256.42	0.0	L	135.24	-0.9	L	107.81	-1.2	L	116.81	-1.1	L	98.05	-1.4	L	149.17	-0.8	M	270.99	0.1	L	99.91	-1.3	L	109.96	-1.2	M	254.52	0
ENSOCUG00000002341	CAPG	M	19.59	0.3	M	18.95	0.2	H	39.82	1.3	H	32.35	1.0	M	17.33	0.1	M	23.91	0.6	H	28.78	0.8	M	19.29	0.3	H	31.8	1.0	M	16.0	0
ENSOCUG00000002383	LPAR6	M	15.69	0.4	M	14.47	0.3	H	25.47	1.1	M	11.5	-0.0	M	13.8	0.1	M	18.9	0.6	M	10.23	-0.3	M	16.19	0.4	M	18.34	0.6	M	12.29	0
ENSOCUG00000002384	NPAS2	M	16.37	-0.0	H	29.47	0.8	H	34.09	1.0	H	39.46	1.2	M	24.4	0.5	H	29.59	0.8	H	37.8	1.2	H	31.77	0.9	M	22.22	0.4	M	16.5	0
ENSOCUG00000002417	ENSOCUG00000002417	M	27.46	0.2	M	32.61	0.5	H	41.95	0.8	H	41.31	0.8	M	30.4	0.4	H	58.18	1.3	H	48.31	1.0	M	24.6	0.1	M	32.81	0.4	M	23.57	0
ENSOCUG00000002473	OLFML2A	M	239.85	-0.0	H	440.31	0.8	H	506.74	1.0	M	309.72	0.3	M	349.76	0.5	M	321.09	0.4	M	318.0	0.4	M	287.56	0.2	M	383.32	0.6	M	248.16	0
ENSOCUG00000002480	ENSOCUG00000002480	M	13.75	0.4	H	19.12	0.8	H	30.9	1.5	H	25.19	1.2	M	16.74	0.6	M	13.57	0.3	M	17.99	0.7	M	14.42	0.4	M	16.1	0.6	M	10.9	0
ENSOCUG00000002485	HLA-DQB1	M	15.38	0.1	M	20.99	0.6	H	30.05	1.1	H	26.49	0.9	M	17.52	0.3	M	17.64	0.4	M	18.3	0.4	M	18.41	0.4	H	24.06	0.8	M	13.96	0
ENSOCUG00000002663	GIGYF1	M	989.04	-0.3	L	669.89	-0.8	L	538.25	-1.1	L	514.28	-1.2	L	465.72	-1.3	L	636.95	-0.9	M	1063.27	-0.1	L	535.81	-1.1	L	650.14	-0.9	M	1178.58	0
ENSOCUG00000002737	SEMA4G	M	18.62	-0.4	M	31.98	0.4	H	49.38	1.0	M	39.44	0.7	M	34.65	0.5	H	48.09	1.0	H	43.17	0.8	M	33.07	0.4	M	32.67	0.4	M	24.45	0
ENSOCUG00000002802	ENSOCUG00000002802	M	63.15	0.4	L	17.85	-1.4	L	17.01	-1.4	L	17.45	-1.4	L	22.48	-1.1	M	49.93	0.1	H	96.41	1.0	M	31.3	-0.6	L	27.62	-0.8	M	47.14	0
ENSOCUG00000002859	ADAMTS5	M	21.69	-0.0	M	29.72	0.4	H	48.14	1.2	H	38.69	0.8	M	29.24	0.4	H	38.0	0.8	M	29.82	0.5	M	32.68	0.6	M	31.98	0.6	M	21.6	0
ENSOCUG00000002863	IFIH1	M	71.13	0.1	M	61.9	-0.1	M	46.52	-0.6	M	51.09	-0.4	M	48.34	-0.5	L	27.87	-1.3	M	47.86	-0.5	M	82.95	0.3	M	45.84	-0.6	M	67.04	0
ENSOCUG00000002893	C7orf57	M	167.36	-0.1	M	165.16	-0.1	M	134.61	-0.4	M	144.61	-0.3	M	158.05	-0.2	M	143.11	-0.3	L	87.15	-1.0	M	168.2	-0.1	M	120.5	-0.6	M	177.16	0
ENSOCUG00000003055	ENSOCUG00000003055	M	216.06	-0.4	M	288.12	-0.0	H	512.31	0.8	M	461.45	0.7	H	656.53	1.2	M	438.14	0.6	M	296.23	0.0	H	490.26	0.8	M	466.1	0.7	M	288.77	0
ENSOCUG00000003187	REM1	M	31.24	0.3	H	44.28	0.9	H	62.9	1.4	M	39.2	0.7	M	40.7	0.7	H	44.97	0.9	M	33.55	0.4	M	38.05	0.6	H	48.18	1.0	M	24.61	0
ENSOCUG00000003203	TPX2	M	283.01	0.3	L	135.18	-0.8	L	128.21	-0.9	M	140.11	-0.7	M	145.67	-0.7	L	106.82	-1.1	M	353.87	0.6	M	172.89	-0.4	M	157.99	-0.6	M	235.59	0
ENSOCUG00000003221	KDM7A	M	123.08	0.2	M	141.95	0.4	H	179.13	0.8	H	187.72	0.8	H	209.46	1.0	M	117.57	0.2	M	160.95	0.6	H	187.16	0.8	M	152.06	0.5	M	103.99	0
ENSOCUG00000003238	AQP11	M	16.98	0.1	M	16.84	0.0	M	14.51	-0.1	M	19.82	0.3	M	16.84	0.1	M	16.69	0.0	L	7.46	-1.1	M	13.53	-0.3	M	15.81	-0.0	M	16.17	0
ENSOCUG00000003277	NUSAP1	M	12.85	0.4	M	10.5	0.1	M	13.69	0.4	M	10.42	0.1	M	15.11	0.6	M	14.65	0.5	M	13.18	0.4	H	21.57	1.1	M	10.85	0.1	M	10.03	0
ENSOCUG00000003333	LIFR	M	245.05	0.0	M	200.98	-0.3	M	214.46	-0.2	M	256.42	0.1	M	290.11	0.3	M	178.69	-0.4	H	498.91	1.0	M	245.94	0.0	M	266.23	0.1	M	241.6	0
ENSOCUG00000003372	ART3	M	1097.49	0.2	M	985.4	0.1	L	463.99	-1.0	L	445.78	-1.1	L	492.73	-0.9	M	688.07	-0.5	M	1202.87	0.4	L	451.24	-1.1	L	437.73	-1.1	M	941.79	0
ENSOCUG00000003397	IQGAP2	M	5.41	-0.1	M	7.88	0.5	H	14.88	1.4	H	12.47	1.1	M	6.13	0.1	H	14.64	1.4	M	9.39	0.7	M	7.77	0.5	H	12.13	1.1	M	5.64	0
ENSOCUG00000003504	SLFN13	M	27.66	-0.3	M	21.73	-0.6	L	15.68	-1.1	L	12.12	-1.5	L	15.0	-1.2	L	19.88	-0.8	M	34.33	0.0	L	17.69	-0.9	M	21.82	-0.6	M	33.86	0
ENSOCUG00000003599	PTPN6	M	7.02	0.2	M	9.14	0.6	H	12.9	1.2	H	10.49	0.8	H	10.7	0.9	M	8.86	0.6	M	6.68	0.1	M	9.43	0.7	H	13.17	1.1	M	6.05	0
ENSOCUG00000003620	CCDC88A	M	50.38	0.0	M	76.88	0.6	H	123.34	1.3	M	78.56	0.7	H	93.93	0.9	M	66.33	0.4	M	78.74	0.7	H	134.98	1.5	H	93.44	0.9	M	49.2	0
ENSOCUG00000003627	GPSM2	M	54.66	-0.0	M	76.76	0.5	H	116.22	1.1	M	61.22	0.2	M	70.68	0.4	H	94.28	0.8	H	113.07	1.0	M	85.31	0.6	M	83.49	0.6	M	55.26	0
ENSOCUG00000003851	NHLRC1	M	33.52	0.2	L	15.31	-0.9	L	14.62	-1.0	M	17.84	-0.7	L	15.86	-0.9	M	19.0	-0.6	M	26.15	-0.2	L	16.2	-0.8	L	15.01	-1.0	M	28.94	0
ENSOCUG00000003874	ENSOCUG00000003874	M	40.12	0.1	M	39.7	0.1	M	22.75	-0.7	M	26.08	-0.6	M	29.93	-0.4	M	33.69	-0.2	L	18.48	-1.0	M	42.4	0.2	M	34.41	-0.1	M	38.4	0
ENSOCUG00000003924	ENSOCUG00000003924	M	33.34	-0.1	M	35.01	0.0	M	29.99	-0.2	L	19.35	-0.8	L	7.94	-2.1	M	35.12	0.0	M	23.89	-0.6	M	35.04	0.0	L	9.78	-1.8	M	34.86	0
ENSOCUG00000003968	ENSOCUG00000003968	M	838.96	-0.0	M	577.39	-0.6	L	479.36	-0.8	L	401.07	-1.1	M	536.8	-0.7	M	537.34	-0.7	L	396.68	-1.1	M	596.64	-0.5	M	666.09	-0.4	M	849.21	0
ENSOCUG00000003978	SPECC1	M	250.93	-0.3	M	294.77	-0.1	L	180.65	-0.8	M	346.39	0.1	M	198.23	-0.7	L	101.52	-1.6	M	224.77	-0.5	M	207.81	-0.6	M	203.18	-0.6	M	312.96	0
ENSOCUG00000003979	MANSC1	M	16.44	-0.4	M	23.22	0.1	H	48.28	1.2	M	29.24	0.5	H	41.18	0.9	M	32.23	0.6	M	25.23	0.1	H	40.11	0.9	H	36.61	0.8	M	21.37	0
ENSOCUG00000004049	TARDBP	M	2633.66	-0.2	M	2144.07	-0.5	M	1864.89	-0.7	L	1487.55	-1.0	M	2117.51	-0.5	M	1987.72	-0.6	M	1894.55	-0.7	M	2310.96	-0.4	M	2280.78	-0.4	M	3009.88	0
ENSOCUG00000004054	CCDC34	M	27.19	-0.2	M	23.17	-0.5	L	18.09	-0.8	M	23.66	-0.4	L	13.81	-1.2	L	18.77	-0.8	M	32.73	0.0	L	15.62	-1.0	L	18.41	-0.8	M	32.15	0
ENSOCUG00000004186	PMM2	M	71.62	0.4	M	81.15	0.6	M	90.03	0.7	M	79.0	0.6	M	88.96	0.7	H	110.29	1.0	M	69.33	0.3	H	103.38	0.9	H	99.71	0.9	M	54.97	0
ENSOCUG00000004218	CD14	M	12.91	0.2	H	22.54	1.0	H	19.74	0.8	M	14.95	0.4	M	11.12	0.0	H	22.0	1.0	M	12.73	0.2	M	13.94	0.3	M	12.47	0.2	M	10.87	0
ENSOCUG00000004231	BACH2	M	18.38	-0.4	M	14.27	-0.7	M	20.12	-0.3	M	17.93	-0.4	M	19.52	-0.3	M	30.02	0.3	M	23.41	-0.1	M	15.77	-0.6	L	8.99	-1.4	M	23.67	0
ENSOCUG00000004359	SERPINE2	M	11.84	-0.1	M	17.86	0.5	H	30.38	1.3	M	13.24	0.1	M	16.27	0.4	H	27.16	1.1	M	15.21	0.2	H	26.71	1.1	M	21.0	0.7	M	12.57	0
ENSOCUG00000004377	ENSOCUG00000004377	M	333.99	-0.1	M	240.55	-0.6	L	204.87	-0.8	M	238.53	-0.6	L	182.62	-1.0	L	184.63	-0.9	M	288.06	-0.3	L	158.02	-1.2	L	178.53	-1.0	M	357.21	0
ENSOCUG00000004418	CREB3L1	M	76.66	-0.1	H	149.91	0.8	H	228.38	1.5	H	164.55	1.0	M	101.57	0.3	M	97.71	0.2	M	89.15	0.1	M	116.73	0.5	M	138.61	0.7	M	83.19	0
ENSOCUG00000004447	ALPL	M	14.7	-0.2	M	15.52	-0.2	L	5.57	-1.6	M	11.13	-0.7	L	9.51	-0.9	L	6.92	-1.3	L	7.12	-1.2	L	10.18	-0.8	L	6.45	-1.5	M	17.49	0
ENSOCUG00000004488	GMFB	M	77.13	-0.1	M	121.01	0.5	H	181.81	1.1	H	143.9	0.8	H	151.39	0.8	M	141.75	0.7	M	100.62	0.2	H	144.9	0.8	M	142.9	0.7	M	85.34	0
ENSOCUG00000004491	CCDC73	M	96.63	0.0	M	58.21	-0.7	L	41.13	-1.2	L	47.35	-1.0	L	51.2	-0.9	M	67.32	-0.5	M	124.95	0.4	M	75.87	-0.3	M	60.76	-0.6	M	95.23	0
ENSOCUG00000004543	AIFM2	M	578.02	0.1	L	249.41	-1.1	L	317.79	-0.8	L	308.78	-0.8	L	314.73	-0.8	M	420.16	-0.4	M	493.92	-0.2	L	322.31	-0.8	M	381.83	-0.5	M	548.82	0
ENSOCUG00000004554	ENSOCUG00000004554	M	43.88	-0.4	M	34.64	-0.7	M	78.4	0.5	L	24.49	-1.2	M	34.56	-0.7	M	81.22	0.5	M	46.34	-0.3	L	16.74	-1.8	L	30.28	-0.9	M	56.68	0
ENSOCUG00000004590	ENSOCUG00000004590	M	23.69	0.3	H	37.81	1.0	H	50.84	1.4	H	43.67	1.2	H	36.45	0.9	H	50.91	1.4	M	24.78	0.4	H	36.36	0.9	H	37.2	0.9	M	19.45	0
ENSOCUG00000004616	MTMR11	M	11.49	-0.0	M	14.66	0.3	H	29.87	1.4	M	11.76	0.1	M	9.23	-0.3	M	19.78	0.7	H	28.99	1.3	M	19.51	0.7	H	23.95	1.0	M	11.63	0
ENSOCUG00000004656	DOK1	M	15.47	0.4	M	17.4	0.5	H	25.55	1.1	H	21.57	0.8	M	15.65	0.4	H	20.89	0.8	H	29.42	1.2	M	15.02	0.3	H	21.81	0.8	M	12.21	0
ENSOCUG00000004672	ENSOCUG00000004672	M	183.64	0.2	M	119.07	-0.4	M	101.97	-0.6	M	119.24	-0.4	M	97.63	-0.6	M	104.4	-0.6	M	135.13	-0.2	M	114.19	-0.4	L	75.51	-1.0	M	154.67	0
ENSOCUG00000004728	SHFL	M	18.62	0.4	M	18.16	0.4	H	35.56	1.4	M	14.18	0.1	M	15.93	0.2	M	20.58	0.6	M	21.79	0.6	M	21.57	0.6	H	27.47	1.0	M	13.54	0
ENSOCUG00000004829	ESR1	M	68.82	-0.2	H	134.47	0.8	H	150.0	0.9	H	144.16	0.9	H	173.26	1.1	M	95.23	0.3	M	72.99	-0.1	M	123.02	0.6	M	118.24	0.6	M	78.07	0
ENSOCUG00000004879	PTGR1	M	56.71	0.2	M	61.22	0.3	H	118.73	1.3	M	48.79	0.0	M	48.94	0.0	H	91.66	0.9	M	49.32	0.0	M	61.91	0.4	M	50.8	0.1	M	48.58	0
ENSOCUG00000004900	PALLD	M	798.88	-0.3	M	1545.71	0.6	H	1668.76	0.8	H	1799.34	0.9	H	1859.34	0.9	H	1936.78	1.0	M	739.7	-0.4	H	2109.99	1.1	H	1727.78	0.8	M	984.81	0
ENSOCUG00000004988	LOXL4	M	13.47	-0.1	M	20.0	0.5	H	35.88	1.4	M	19.52	0.5	M	18.66	0.4	H	24.66	0.8	M	16.81	0.2	M	18.73	0.4	H	23.92	0.8	M	13.96	0
ENSOCUG00000005026	ENSOCUG00000005026	M	18.58	0.3	M	19.57	0.3	H	28.68	0.9	H	28.2	0.9	H	29.36	0.9	M	24.29	0.6	H	29.22	0.9	H	31.63	1.1	H	40.94	1.4	M	15.16	0
ENSOCUG00000005078	STAT5B	M	1492.86	0.4	M	1092.34	-0.0	M	903.51	-0.3	M	1137.91	0.0	M	994.31	-0.2	M	970.0	-0.2	H	2261.12	1.0	M	878.2	-0.4	M	1176.96	0.1	M	1124.5	0
ENSOCUG00000005137	ABCA3	M	443.43	0.1	M	299.87	-0.5	M	266.84	-0.6	M	400.23	-0.0	L	228.38	-0.8	L	234.99	-0.8	M	503.4	0.3	L	196.64	-1.1	M	331.96	-0.3	M	411.79	0
ENSOCUG00000005158	ENSOCUG00000005158	M	11.72	-0.2	M	20.88	0.7	H	26.04	1.0	M	14.58	0.1	M	17.26	0.4	H	27.33	1.0	M	17.39	0.4	M	21.21	0.7	M	16.27	0.3	M	13.47	0
ENSOCUG00000005163	MAP2	M	7.41	-0.4	M	11.89	0.3	M	16.53	0.7	M	15.51	0.7	M	14.85	0.6	M	11.14	0.1	M	12.86	0.3	H	20.33	1.0	M	11.04	0.1	M	9.9	0
ENSOCUG00000005233	ETV5	M	66.02	-0.2	M	114.46	0.6	H	147.44	1.0	H	130.72	0.8	H	136.83	0.8	H	160.85	1.1	M	84.79	0.2	H	136.92	0.8	H	129.35	0.8	M	76.51	0
ENSOCUG00000005262	ENSOCUG00000005262	M	25.37	-0.2	L	14.34	-1.0	L	15.86	-0.9	L	13.5	-1.1	M	20.63	-0.4	L	15.51	-0.8	M	28.93	0.0	M	19.49	-0.5	L	14.54	-1.0	M	28.53	0
ENSOCUG00000005398	CCNE2	M	27.27	0.4	L	8.63	-1.3	L	6.25	-1.7	L	9.46	-1.1	L	8.07	-1.4	L	6.89	-1.5	H	37.22	0.9	L	8.19	-1.3	L	8.72	-1.2	M	20.69	0
ENSOCUG00000005508	CCDC6	M	478.79	0.2	L	159.7	-1.4	L	191.47	-1.1	L	239.3	-0.8	M	272.36	-0.6	M	261.8	-0.7	M	471.49	0.2	L	215.15	-0.9	L	226.87	-0.9	M	414.2	0
ENSOCUG00000005534	ENSOCUG00000005534	M	68.03	0.0	M	40.34	-0.7	M	73.83	0.1	L	34.09	-1.0	M	72.91	0.1	M	72.65	0.1	L	33.45	-1.0	M	48.11	-0.5	M	41.22	-0.7	M	67.88	0
ENSOCUG00000005602	P3H1	M	95.99	-0.0	M	125.87	0.4	H	197.74	1.0	M	145.68	0.6	M	145.35	0.6	H	165.82	0.8	M	128.8	0.4	M	144.96	0.6	M	155.85	0.7	M	98.17	0
ENSOCUG00000005611	ZNF691	M	7.39	-0.2	H	14.42	0.8	M	11.0	0.4	M	8.8	0.1	M	10.64	0.3	H	17.01	1.0	M	12.76	0.6	M	12.76	0.6	M	14.0	0.7	M	8.51	0
ENSOCUG00000005736	ENSOCUG00000005736	M	153.78	-0.3	M	147.93	-0.3	L	64.32	-1.5	L	89.69	-1.0	L	92.37	-1.0	L	102.68	-0.9	M	185.49	-0.0	M	209.78	0.2	L	86.95	-1.1	M	185.81	0
ENSOCUG00000005780	HPN	M	39.36	0.1	M	27.55	-0.4	M	52.7	0.5	M	33.81	-0.1	M	36.59	0.0	M	58.11	0.7	H	79.45	1.1	M	54.05	0.6	L	20.24	-0.8	M	36.55	0
ENSOCUG00000005896	INPP4B	M	64.01	0.0	H	109.55	0.8	H	169.01	1.5	M	79.87	0.4	H	134.17	1.1	H	152.35	1.3	M	82.46	0.4	H	130.82	1.1	H	143.85	1.2	M	61.98	0
ENSOCUG00000005904	ENSOCUG00000005904	M	13.06	-0.3	M	20.41	0.3	H	52.04	1.7	M	25.41	0.7	H	31.61	1.0	M	21.91	0.4	M	26.94	0.7	M	17.18	0.1	M	18.4	0.2	M	16.3	0
ENSOCUG00000005924	SLC2A1	M	47.74	-0.4	H	137.84	1.1	H	172.18	1.5	M	89.57	0.5	H	133.27	1.1	H	104.79	0.8	M	61.74	-0.0	H	126.17	1.0	M	100.29	0.7	M	62.77	0
ENSOCUG00000005940	ARNTL	M	147.35	-0.2	L	68.29	-1.3	L	61.4	-1.5	L	62.36	-1.4	L	30.06	-2.5	L	65.16	-1.4	M	185.95	0.1	L	62.95	-1.4	L	76.42	-1.1	M	169.91	0
ENSOCUG00000005987	POMGNT2	M	107.77	-0.4	M	95.91	-0.5	M	90.26	-0.6	M	100.81	-0.5	L	81.75	-0.8	L	79.17	-0.8	M	122.6	-0.2	L	69.54	-1.0	L	78.62	-0.8	M	140.21	0
ENSOCUG00000005992	RALB	M	109.85	0.4	M	141.07	0.7	H	162.57	0.9	M	139.73	0.7	M	142.56	0.7	H	176.72	1.0	M	106.37	0.3	H	157.75	0.9	H	145.04	0.8	M	86.64	0
ENSOCUG00000006045	EZH1	M	675.03	-0.2	M	468.44	-0.7	L	416.56	-0.9	L	407.93	-0.9	L	371.08	-1.1	L	444.0	-0.8	M	733.23	-0.1	L	394.28	-1.0	L	463.65	-0.8	M	783.3	0
ENSOCUG00000006102	USP36	M	411.46	0.2	M	500.67	0.5	H	749.42	1.1	M	554.64	0.7	M	472.82	0.4	M	507.44	0.5	M	525.07	0.6	M	475.83	0.4	M	530.68	0.6	M	350.38	0
ENSOCUG00000006343	KLF9	M	793.43	-0.4	M	857.46	-0.3	M	669.94	-0.6	M	698.9	-0.6	M	698.7	-0.6	L	492.4	-1.1	M	998.12	-0.1	M	785.05	-0.4	M	755.92	-0.5	M	1049.12	0
ENSOCUG00000006463	PRKAG2	M	136.2	0.2	M	157.32	0.5	M	182.54	0.7	H	245.25	1.1	M	153.86	0.4	H	252.46	1.1	M	91.11	-0.3	M	147.28	0.4	M	153.44	0.4	M	114.59	0
ENSOCUG00000006490	ENSOCUG00000006490	M	9.18	-0.1	L	3.57	-1.4	M	7.81	-0.2	L	5.68	-0.8	M	8.68	-0.1	M	6.76	-0.5	L	5.91	-0.8	L	5.16	-0.9	M	6.87	-0.5	M	9.48	0
ENSOCUG00000006505	MGA	M	81.44	-0.1	M	116.03	0.4	M	143.13	0.7	H	167.24	1.0	H	193.01	1.2	M	128.49	0.6	H	153.27	0.8	H	175.63	1.0	H	151.19	0.8	M	85.59	0
ENSOCUG00000006521	DEPP1	M	83.59	-0.4	M	122.07	0.2	M	117.09	0.1	M	77.55	-0.5	M	118.83	0.1	M	92.57	-0.2	H	318.87	1.6	M	125.71	0.2	M	115.41	0.1	M	108.3	0
ENSOCUG00000006565	FAM126A	M	104.69	0.0	H	214.04	1.0	H	220.67	1.1	H	225.44	1.1	H	214.5	1.0	M	166.48	0.7	M	131.03	0.3	H	254.91	1.3	H	234.51	1.2	M	104.14	0
ENSOCUG00000006691	GSDME	M	5.8	-0.3	H	20.84	1.6	H	19.6	1.5	M	10.6	0.6	M	9.4	0.4	H	13.12	0.9	M	7.98	0.1	H	25.38	1.9	M	10.91	0.7	M	7.14	0
ENSOCUG00000006750	HEXIM2	M	293.91	0.3	L	128.16	-0.9	L	82.23	-1.6	L	135.44	-0.9	L	97.87	-1.3	L	114.12	-1.1	M	183.58	-0.4	L	89.42	-1.5	L	103.59	-1.2	M	245.3	0
ENSOCUG00000006816	RAB4A	M	55.21	0.4	M	34.45	-0.3	M	43.78	0.1	M	46.41	0.2	H	76.48	0.9	H	73.28	0.8	M	65.96	0.7	M	62.86	0.6	H	88.1	1.1	M	41.77	0
ENSOCUG00000006822	CCSAP	M	48.05	-0.4	M	56.03	-0.2	L	34.62	-0.8	L	25.05	-1.3	M	53.38	-0.2	M	43.24	-0.5	L	30.32	-1.0	M	58.64	-0.1	L	24.97	-1.3	M	61.84	0
ENSOCUG00000007004	CEP41	M	9.81	0.1	H	15.25	0.8	M	14.21	0.7	M	13.08	0.6	H	17.7	1.0	H	21.39	1.3	M	9.92	0.2	H	16.02	0.9	M	14.21	0.7	M	8.79	0
ENSOCUG00000007014	SH3D19	M	36.63	-0.2	M	53.54	0.4	H	123.66	1.6	M	68.38	0.7	H	72.67	0.8	H	77.41	0.9	H	89.88	1.1	H	71.42	0.8	H	77.29	0.9	M	41.68	0
ENSOCUG00000007159	ENSOCUG00000007159	M	195.52	-0.2	L	115.69	-1.0	M	204.97	-0.2	M	185.8	-0.3	M	185.73	-0.3	M	188.13	-0.3	L	106.69	-1.1	L	111.34	-1.0	L	123.38	-0.9	M	229.74	0
ENSOCUG00000007241	IPPK	M	32.39	0.1	H	62.84	1.0	H	54.19	0.8	H	62.76	1.0	H	60.55	1.0	M	47.57	0.6	M	39.03	0.3	H	62.15	1.0	H	55.38	0.8	M	31.31	0
ENSOCUG00000007258	STRN	M	16.63	0.2	M	15.99	0.1	M	19.48	0.4	M	16.86	0.2	M	25.22	0.7	M	16.09	0.1	H	33.89	1.2	M	22.05	0.6	M	22.95	0.6	M	14.39	0
ENSOCUG00000007286	COL4A4	M	26.55	0.0	H	78.2	1.6	H	91.62	1.8	H	64.65	1.3	H	88.12	1.8	H	63.53	1.3	M	33.16	0.4	H	77.2	1.6	H	64.44	1.3	M	25.16	0
ENSOCUG00000007323	ENSOCUG00000007323	M	171.47	0.4	L	71.14	-0.9	M	107.18	-0.3	M	83.09	-0.7	M	105.29	-0.4	L	66.42	-1.0	M	118.66	-0.2	M	86.89	-0.6	M	81.69	-0.7	M	134.22	0
ENSOCUG00000007333	RBBP8	M	18.49	0.1	H	29.57	0.8	M	27.84	0.7	M	26.02	0.6	H	37.11	1.1	M	22.13	0.3	H	30.64	0.8	H	37.32	1.1	H	32.0	0.9	M	17.68	0
ENSOCUG00000007383	CCNT1	M	32.88	0.3	M	35.18	0.4	M	43.57	0.7	H	55.3	1.0	H	51.81	0.9	M	33.99	0.3	M	39.67	0.6	M	42.57	0.6	M	33.85	0.3	M	26.97	0
ENSOCUG00000007488	SUSD2	M	25.36	-0.4	M	47.99	0.6	H	61.3	0.9	M	44.97	0.4	M	53.1	0.7	H	74.21	1.2	M	37.13	0.2	H	60.48	0.9	M	55.33	0.7	M	32.95	0
ENSOCUG00000007522	PGBD2	M	65.61	0.3	H	114.83	1.1	M	88.74	0.7	M	86.26	0.7	H	90.17	0.8	M	86.11	0.7	M	65.08	0.3	H	91.67	0.8	M	87.76	0.7	M	53.8	0
ENSOCUG00000007526	CTH	M	11.6	-0.2	M	18.29	0.5	H	23.53	0.8	M	17.79	0.5	H	25.72	1.0	M	15.78	0.3	M	10.27	-0.3	H	26.83	1.0	H	25.16	1.0	M	12.78	0
ENSOCUG00000007558	ZNF512B	M	120.54	0.3	M	140.14	0.6	M	149.05	0.6	M	134.07	0.5	M	130.2	0.4	M	149.87	0.7	H	201.48	1.1	M	136.44	0.5	M	132.72	0.5	M	95.84	0
ENSOCUG00000007616	TENM3	M	137.88	-0.1	M	90.51	-0.7	M	122.64	-0.3	L	83.96	-0.9	L	57.81	-1.4	L	45.2	-1.8	L	62.83	-1.3	L	49.94	-1.6	L	47.32	-1.7	M	152.15	0
ENSOCUG00000007640	GNA13	M	34.87	0.1	M	39.97	0.3	M	47.97	0.5	H	66.01	1.0	M	51.4	0.6	M	44.04	0.4	M	53.96	0.7	M	45.04	0.5	H	58.62	0.8	M	31.91	0
ENSOCUG00000007685	ANGPTL2	M	333.07	0.2	H	858.65	1.5	H	1073.02	1.8	H	959.6	1.7	H	712.03	1.2	H	657.87	1.1	M	325.77	0.1	H	704.48	1.2	H	754.76	1.3	M	300.5	0
ENSOCUG00000007844	SOS1	M	161.43	-0.1	M	237.0	0.4	M	255.29	0.5	M	283.9	0.7	M	296.95	0.7	M	222.43	0.3	M	263.46	0.6	H	369.24	1.0	H	314.69	0.8	M	178.57	0
ENSOCUG00000007885	KCNAB1	M	34.92	-0.1	L	18.59	-1.0	M	28.99	-0.3	M	25.41	-0.6	M	24.69	-0.6	M	22.97	-0.7	M	25.13	-0.6	L	21.75	-0.8	M	25.97	-0.5	M	36.92	0
ENSOCUG00000007907	OCIAD2	M	1091.59	-0.3	L	693.5	-1.0	L	632.62	-1.1	L	633.97	-1.1	M	820.12	-0.7	M	849.59	-0.7	M	960.09	-0.5	M	977.08	-0.5	M	1045.75	-0.4	M	1349.4	0
ENSOCUG00000007928	APOM	M	12.19	0.0	L	6.52	-0.9	L	4.63	-1.4	M	7.99	-0.7	L	7.14	-0.8	M	8.47	-0.5	M	12.05	0.0	M	8.17	-0.6	L	4.72	-1.3	M	12.2	0
ENSOCUG00000008031	ETV4	M	54.86	0.2	M	77.82	0.7	M	66.58	0.5	M	60.01	0.4	H	79.52	0.8	H	109.3	1.2	M	45.0	-0.0	H	87.32	0.9	M	63.79	0.5	M	46.59	0
ENSOCUG00000008052	PIK3C2B	M	868.63	0.4	H	1273.49	1.0	H	1421.57	1.1	H	1607.64	1.3	H	1307.12	1.0	H	1421.24	1.1	M	809.46	0.3	H	1207.79	0.9	H	1269.49	1.0	M	649.71	0
ENSOCUG00000008054	CYP20A1	M	26.05	0.1	M	31.81	0.4	H	64.57	1.4	M	35.55	0.6	M	37.87	0.7	M	39.96	0.7	M	34.37	0.5	M	36.93	0.6	H	40.68	0.8	M	23.33	0
ENSOCUG00000008068	BCHE	M	17.62	-0.1	M	11.47	-0.7	H	39.4	1.1	H	33.97	0.8	M	19.0	0.0	M	23.58	0.3	M	31.34	0.7	M	23.67	0.3	M	16.58	-0.2	M	19.37	0
ENSOCUG00000008072	STX18	M	335.14	-0.1	L	187.79	-0.9	L	160.04	-1.1	L	188.8	-0.9	L	181.24	-1.0	M	210.47	-0.7	M	285.87	-0.3	L	167.72	-1.1	L	203.64	-0.8	M	352.29	0
ENSOCUG00000008092	ACOT11	M	103.7	-0.2	M	196.95	0.7	M	179.6	0.6	L	46.78	-1.3	M	150.49	0.3	H	204.12	0.8	M	87.86	-0.4	M	154.74	0.4	M	87.32	-0.4	M	119.41	0
ENSOCUG00000008102	MTSS1	M	153.47	-0.4	M	280.11	0.4	H	453.25	1.1	M	321.05	0.6	M	327.46	0.7	M	339.16	0.7	M	247.91	0.3	H	421.55	1.0	H	411.84	1.0	M	206.95	0
ENSOCUG00000008192	SERTAD2	M	57.53	0.4	M	56.13	0.3	M	66.29	0.6	H	108.12	1.3	M	68.89	0.6	M	53.22	0.3	M	44.58	0.0	M	46.09	0.1	M	44.1	-0.0	M	44.01	0
ENSOCUG00000008247	ENSOCUG00000008247	M	562.47	0.1	L	304.54	-0.8	L	246.76	-1.1	L	270.94	-0.9	L	268.38	-1.0	L	218.54	-1.3	M	493.44	-0.1	M	317.61	-0.7	L	299.21	-0.8	M	524.0	0
ENSOCUG00000008311	ST3GAL6	M	725.53	-0.4	M	818.98	-0.2	M	609.99	-0.6	M	731.81	-0.4	M	666.17	-0.5	L	402.43	-1.2	M	639.53	-0.6	M	654.13	-0.5	M	647.23	-0.5	M	935.75	0
ENSOCUG00000008330	ENSOCUG00000008330	M	27.95	-0.1	H	69.56	1.3	H	60.16	1.1	H	63.84	1.1	H	65.04	1.1	H	50.47	0.8	M	27.5	-0.1	H	63.05	1.1	H	67.32	1.2	M	29.14	0
ENSOCUG00000008350	ZMYM1	M	35.78	0.2	M	49.2	0.6	M	49.75	0.7	H	54.31	0.8	M	52.11	0.7	M	42.84	0.4	H	56.26	0.9	H	62.99	1.0	M	45.68	0.5	M	32.05	0
ENSOCUG00000008358	ENSOCUG00000008358	M	14.89	-0.3	M	11.57	-0.7	L	10.96	-0.8	M	13.95	-0.4	L	9.32	-1.0	M	15.27	-0.3	M	11.82	-0.7	M	12.41	-0.6	M	12.07	-0.6	M	18.94	0
ENSOCUG00000008364	PTPN4	M	30.53	0.1	M	39.92	0.4	M	45.82	0.6	H	58.71	1.0	H	76.28	1.4	M	29.33	-0.0	H	66.51	1.2	H	81.75	1.5	M	42.71	0.5	M	29.15	0
ENSOCUG00000008388	CCNG2	M	380.03	0.0	L	192.64	-1.0	L	196.55	-0.9	L	219.01	-0.8	L	204.49	-0.9	L	189.69	-1.0	M	357.67	-0.1	L	187.3	-1.0	M	231.36	-0.7	M	379.44	0
ENSOCUG00000008419	SLC25A30	M	578.24	-0.3	L	422.54	-0.8	L	416.22	-0.8	M	535.89	-0.4	M	504.51	-0.5	L	384.16	-0.9	L	283.28	-1.4	L	407.57	-0.8	M	458.5	-0.7	M	730.56	0
ENSOCUG00000008545	RRM2B	M	501.11	-0.3	M	415.03	-0.5	L	349.94	-0.8	M	401.29	-0.6	M	455.6	-0.4	L	346.22	-0.8	L	296.14	-1.0	M	431.73	-0.5	M	432.88	-0.5	M	605.16	0
ENSOCUG00000008668	MVP	M	217.53	-0.3	M	199.86	-0.4	M	282.85	0.1	M	207.82	-0.3	M	171.77	-0.6	M	309.44	0.3	M	237.08	-0.1	L	127.09	-1.0	M	167.18	-0.6	M	261.41	0
ENSOCUG00000008715	ENSOCUG00000008715	M	214.58	-0.4	M	176.05	-0.6	M	271.46	-0.0	M	164.57	-0.7	L	156.68	-0.8	M	267.38	-0.0	L	117.27	-1.2	M	251.56	-0.1	L	156.75	-0.8	M	275.0	0
ENSOCUG00000008718	TMEM231	M	39.58	-0.1	M	32.86	-0.4	M	31.82	-0.4	M	28.19	-0.7	L	23.75	-0.9	M	27.08	-0.7	M	47.45	0.1	L	21.5	-1.0	L	21.23	-1.0	M	44.3	0
ENSOCUG00000008750	PSMD7	M	1917.16	-0.1	L	1014.66	-1.0	M	1285.41	-0.7	M	1359.02	-0.6	L	1193.84	-0.8	M	1646.75	-0.3	M	2179.22	0.1	L	1072.54	-0.9	M	1279.88	-0.7	M	2057.72	0
ENSOCUG00000008804	RC3H2	M	44.07	0.3	M	60.67	0.7	H	78.27	1.1	H	78.84	1.1	H	93.97	1.4	M	38.31	0.1	H	61.27	0.8	H	83.47	1.2	H	70.18	1.0	M	36.05	0
ENSOCUG00000008922	FGR	M	10.18	0.0	M	13.66	0.4	H	23.25	1.2	M	16.71	0.7	M	14.44	0.5	H	24.53	1.3	H	18.8	0.9	H	18.75	0.9	M	15.86	0.6	M	10.18	0
ENSOCUG00000008956	PCTP	M	143.22	-0.3	M	135.2	-0.4	L	102.37	-0.8	M	119.39	-0.5	L	96.94	-0.8	L	67.31	-1.4	L	57.46	-1.6	M	112.55	-0.6	L	84.22	-1.0	M	173.35	0
ENSOCUG00000009070	SEMA3C	M	429.44	-0.0	M	674.01	0.6	H	935.78	1.1	H	806.83	0.9	H	836.41	1.0	M	688.93	0.7	M	473.81	0.1	H	873.51	1.0	H	886.11	1.0	M	430.38	0
ENSOCUG00000009103	HLA-DRA	M	53.26	0.3	M	62.46	0.5	H	102.33	1.2	H	100.71	1.2	M	55.98	0.3	M	62.03	0.5	M	65.16	0.5	M	55.56	0.3	H	78.77	0.8	M	44.92	0
ENSOCUG00000009143	ENSOCUG00000009143	M	25.71	0.4	M	24.53	0.4	M	21.54	0.2	H	34.87	0.9	M	15.14	-0.3	M	14.65	-0.3	H	40.27	1.1	M	18.0	-0.1	M	23.23	0.3	M	19.24	0
ENSOCUG00000009149	ECHDC3	M	374.44	-0.3	M	297.43	-0.6	L	259.74	-0.8	L	218.82	-1.1	L	242.96	-0.9	M	303.7	-0.6	M	402.99	-0.2	L	254.37	-0.9	L	270.04	-0.8	M	466.49	0
ENSOCUG00000009183	ANKRD44	M	9.33	-0.4	M	14.34	0.2	M	18.67	0.6	M	13.31	0.2	M	21.4	0.7	M	14.5	0.2	H	36.06	1.5	H	23.38	0.9	M	13.62	0.1	M	12.5	0
ENSOCUG00000009363	HES1	M	60.72	0.4	H	102.63	1.2	H	100.06	1.2	M	70.82	0.7	H	77.94	0.8	H	109.48	1.3	M	49.05	0.1	H	76.7	0.8	H	108.23	1.3	M	45.19	0
ENSOCUG00000009428	RAB6B	M	20.07	0.0	H	43.78	1.1	M	32.02	0.7	H	44.83	1.2	H	34.36	0.8	H	45.37	1.2	H	40.38	1.0	M	25.39	0.3	H	36.73	0.9	M	20.36	0
ENSOCUG00000009447	OSBPL7	M	69.72	0.2	H	137.76	1.2	H	114.56	0.9	H	146.15	1.2	H	150.2	1.3	H	171.47	1.5	M	66.72	0.1	H	149.43	1.3	H	138.76	1.2	M	61.44	0
ENSOCUG00000009585	SRC	M	12.35	-0.2	H	28.46	1.0	H	39.15	1.5	H	34.7	1.3	M	17.83	0.3	H	27.71	1.0	H	33.3	1.2	H	24.78	0.8	H	26.19	0.9	M	14.29	0
ENSOCUG00000009608	SPRY2	M	93.76	0.3	H	130.86	0.8	H	155.52	1.0	H	142.72	0.9	M	112.95	0.5	M	129.65	0.7	M	100.27	0.4	H	131.18	0.8	M	120.39	0.6	M	77.8	0
ENSOCUG00000009634	ENSOCUG00000009634	M	167.66	-0.1	H	358.49	1.0	H	369.94	1.0	H	409.14	1.1	H	361.34	1.0	M	290.11	0.6	M	189.89	0.0	H	333.93	0.9	H	321.33	0.8	M	184.58	0
ENSOCUG00000009700	SATB2	M	28.69	-0.2	M	40.84	0.3	M	50.03	0.6	M	35.58	0.2	M	45.22	0.5	M	43.21	0.4	H	69.21	1.1	M	44.46	0.5	H	56.76	0.8	M	32.45	0
ENSOCUG00000009737	ARRDC4	M	19.87	-0.3	M	26.85	0.2	M	36.05	0.6	M	30.35	0.3	H	44.27	0.9	M	30.21	0.3	H	69.74	1.5	M	33.63	0.5	M	35.38	0.6	M	24.08	0
ENSOCUG00000009755	JARID2	M	355.21	0.4	H	655.96	1.3	H	674.17	1.3	H	575.01	1.1	H	670.69	1.3	H	612.66	1.2	M	260.78	-0.1	H	653.37	1.2	H	584.36	1.1	M	274.82	0
ENSOCUG00000009791	ZNF248	M	29.5	0.4	M	37.77	0.7	M	32.45	0.5	H	48.09	1.1	H	47.13	1.1	M	37.64	0.7	M	22.11	-0.0	M	35.68	0.7	M	32.68	0.5	M	22.73	0
ENSOCUG00000009799	ZBTB43	M	78.49	0.3	M	90.83	0.5	H	135.53	1.1	H	153.52	1.3	H	130.83	1.0	H	133.44	1.1	M	64.59	0.0	M	102.47	0.7	M	66.68	0.1	M	63.56	0
ENSOCUG00000009880	DUSP14	M	28.5	-0.1	L	13.67	-1.2	M	23.84	-0.4	L	17.87	-0.8	L	12.47	-1.3	L	7.55	-2.0	M	21.82	-0.5	L	15.34	-1.0	L	17.92	-0.8	M	30.82	0
ENSOCUG00000009914	ARHGEF40	M	331.89	0.0	M	454.79	0.5	H	675.45	1.1	M	537.22	0.7	M	433.63	0.4	H	634.31	1.0	H	601.73	0.9	M	457.78	0.5	M	538.34	0.7	M	322.57	0
ENSOCUG00000009918	SCARA3	M	90.92	-0.3	M	109.47	0.0	H	301.65	1.5	M	151.24	0.5	M	123.09	0.2	M	128.06	0.2	H	185.89	0.8	M	140.91	0.4	M	151.62	0.5	M	108.67	0
ENSOCUG00000009943	SLC38A2	M	1380.34	0.4	M	1155.33	0.1	M	1529.23	0.5	M	1250.85	0.2	M	1013.12	-0.1	M	1374.15	0.3	H	2653.17	1.3	M	1026.75	-0.1	M	1181.2	0.1	M	1080.34	0
ENSOCUG00000009946	AP3M1	M	157.88	0.1	H	253.86	0.8	H	279.26	0.9	M	237.0	0.7	H	255.46	0.8	M	221.23	0.6	M	173.44	0.2	H	302.7	1.0	M	243.83	0.7	M	148.65	0
ENSOCUG00000009947	LRCH1	M	29.4	-0.1	M	49.71	0.7	H	60.02	0.9	M	47.99	0.6	H	60.94	1.0	H	61.17	1.0	M	32.73	0.1	H	67.79	1.1	H	67.8	1.1	M	30.41	0
ENSOCUG00000009953	SLC25A13	M	45.28	0.1	M	57.83	0.4	H	99.88	1.2	M	62.07	0.5	H	81.48	0.9	H	91.78	1.1	M	52.28	0.3	M	68.54	0.7	H	71.56	0.8	M	42.78	0
ENSOCUG00000010013	NOL3	M	1226.31	-0.4	L	748.67	-1.2	L	704.0	-1.2	L	868.43	-0.9	L	620.83	-1.4	L	962.47	-0.8	M	1235.05	-0.4	L	571.58	-1.5	L	758.42	-1.1	M	1669.56	0
ENSOCUG00000010033	TNIP2	M	15.02	0.2	H	21.83	0.8	M	20.44	0.7	M	16.59	0.4	H	22.94	0.9	H	29.7	1.2	M	16.39	0.4	M	17.53	0.5	M	20.48	0.7	M	12.54	0
ENSOCUG00000010101	IRF5	M	8.66	0.1	M	9.79	0.3	H	16.28	1.1	M	12.84	0.7	M	10.31	0.3	M	11.98	0.6	M	7.23	-0.1	M	8.82	0.2	M	7.65	-0.1	M	7.93	0
ENSOCUG00000010108	RIC1	M	153.61	-0.1	M	173.97	0.1	M	186.39	0.2	M	173.3	0.1	M	208.77	0.4	M	137.15	-0.2	H	327.8	1.0	M	185.68	0.2	M	179.79	0.2	M	158.44	0
ENSOCUG00000010123	ENSOCUG00000010123	M	87.74	0.3	M	75.51	0.1	H	173.4	1.3	M	87.89	0.3	M	67.88	-0.1	M	110.67	0.6	H	130.86	0.9	M	90.74	0.4	M	115.64	0.7	M	71.27	0
ENSOCUG00000010231	CHRNE	M	37.95	0.1	H	63.37	0.8	H	81.14	1.2	H	74.39	1.1	H	63.68	0.8	H	96.39	1.4	M	48.42	0.4	M	57.39	0.7	H	64.72	0.9	M	35.9	0
ENSOCUG00000010280	PGRMC1	M	34.28	-0.2	M	45.58	0.2	H	78.89	1.0	M	48.93	0.3	M	48.56	0.3	M	57.94	0.6	M	59.48	0.6	M	42.95	0.2	M	54.08	0.5	M	39.21	0
ENSOCUG00000010324	KDM3A	M	253.2	-0.2	L	122.54	-1.3	L	149.41	-1.0	L	160.53	-0.9	L	121.87	-1.3	L	138.6	-1.1	M	282.88	-0.1	L	140.48	-1.1	L	165.06	-0.8	M	293.98	0
ENSOCUG00000010390	TMEM67	M	17.03	0.4	L	7.74	-0.8	M	11.67	-0.1	M	9.22	-0.5	M	13.58	0.0	M	14.89	0.2	M	15.37	0.2	M	9.99	-0.4	L	5.39	-1.2	M	13.02	0
ENSOCUG00000010521	ELK1	M	62.42	0.3	H	89.47	0.9	H	87.92	0.8	M	75.67	0.6	H	102.07	1.0	M	81.22	0.7	M	58.6	0.2	H	84.86	0.8	H	95.13	0.9	M	49.4	0
ENSOCUG00000010557	MANBA	M	9.31	0.2	M	10.59	0.4	H	35.3	2.1	M	8.1	-0.0	H	14.27	0.9	H	18.43	1.2	H	21.85	1.4	H	27.56	1.8	H	28.67	1.8	M	7.98	0
ENSOCUG00000010570	ENSOCUG00000010570	M	28.08	0.1	M	35.4	0.5	M	37.41	0.6	H	47.75	0.9	M	37.48	0.6	H	51.77	1.0	M	24.44	-0.1	M	34.38	0.4	M	33.91	0.4	M	25.53	0
ENSOCUG00000010624	ENSOCUG00000010624	M	16.06	-0.2	L	9.39	-0.9	H	32.73	0.9	M	24.3	0.5	L	8.74	-1.0	M	19.02	0.1	H	35.41	1.0	L	9.43	-0.9	M	18.95	0.1	M	17.86	0
ENSOCUG00000010633	HMOX1	M	41.42	-0.3	L	22.97	-1.1	M	32.11	-0.6	M	35.18	-0.5	L	24.14	-1.0	M	44.81	-0.1	H	106.86	1.1	L	22.97	-1.1	M	32.54	-0.6	M	50.22	0
ENSOCUG00000010690	FAM126B	M	25.68	0.4	M	21.83	0.1	H	41.5	1.1	H	37.52	0.9	H	56.3	1.5	M	26.32	0.4	M	28.35	0.6	H	45.09	1.2	H	37.48	0.9	M	19.81	0
ENSOCUG00000010719	WDR76	M	11.19	-0.3	M	10.97	-0.4	M	14.67	0.1	M	15.17	0.1	M	16.33	0.2	M	15.92	0.2	M	15.85	0.2	M	12.29	-0.2	L	5.23	-1.4	M	14.36	0
ENSOCUG00000010729	RASL12	M	50.23	-0.1	H	113.82	1.1	H	179.74	1.7	H	127.31	1.2	H	108.24	1.0	H	139.92	1.4	M	66.33	0.3	H	114.64	1.1	H	132.11	1.3	M	54.43	0
ENSOCUG00000010780	LRRC8B	M	12.5	0.0	M	12.83	0.1	H	30.09	1.3	H	20.73	0.8	M	15.28	0.3	H	24.83	1.0	M	14.64	0.3	H	20.95	0.8	M	13.01	0.1	M	12.18	0
ENSOCUG00000010844	ARHGEF15	M	67.78	-0.2	H	160.26	1.0	H	151.9	0.9	M	130.16	0.7	H	137.62	0.8	H	164.55	1.0	M	93.4	0.2	H	141.19	0.8	H	154.37	0.9	M	80.07	0
ENSOCUG00000010861	PEX11G	M	26.4	-0.4	M	31.16	-0.2	M	23.26	-0.6	L	17.25	-1.0	L	19.83	-0.9	M	24.08	-0.6	M	25.77	-0.5	L	20.56	-0.8	L	18.83	-0.9	M	35.41	0
ENSOCUG00000010929	NAGPA	M	301.47	0.2	M	183.49	-0.5	M	161.06	-0.7	M	167.29	-0.7	L	123.47	-1.1	M	160.33	-0.7	M	221.22	-0.3	L	113.66	-1.2	L	152.97	-0.8	M	264.28	0
ENSOCUG00000011062	BTBD8	M	37.42	-0.2	L	21.82	-1.0	L	21.99	-1.0	L	21.85	-1.0	M	30.22	-0.5	L	25.76	-0.8	M	35.98	-0.3	M	27.94	-0.7	L	25.64	-0.8	M	44.35	0
ENSOCUG00000011366	CASTOR2	M	418.08	-0.0	M	307.96	-0.5	L	226.27	-0.9	M	337.76	-0.3	L	188.25	-1.2	L	222.95	-0.9	M	376.28	-0.2	M	255.42	-0.7	L	209.74	-1.0	M	423.15	0
ENSOCUG00000011555	PPP2R2C	M	83.3	-0.3	M	63.79	-0.7	M	72.76	-0.5	M	79.02	-0.4	L	43.76	-1.2	L	56.75	-0.8	M	92.07	-0.1	M	67.73	-0.6	L	55.69	-0.9	M	101.31	0
ENSOCUG00000011610	VEGFA	M	1180.29	-0.4	M	1510.05	0.0	M	1363.98	-0.1	M	1418.44	-0.1	M	1279.87	-0.2	M	2291.17	0.6	L	733.34	-1.0	M	1400.71	-0.1	M	1778.82	0.2	M	1506.51	0
ENSOCUG00000011630	SPICE1	M	37.19	-0.1	M	25.29	-0.7	M	25.55	-0.7	L	21.81	-0.8	L	22.57	-0.8	L	20.64	-1.0	M	37.95	-0.1	L	20.88	-0.9	L	16.95	-1.2	M	40.54	0
ENSOCUG00000011690	SLC25A28	M	185.63	-0.3	L	130.19	-0.8	L	127.64	-0.8	L	125.56	-0.9	L	107.77	-1.1	M	141.31	-0.7	M	280.77	0.3	L	133.65	-0.8	L	131.43	-0.8	M	229.77	0
ENSOCUG00000011742	CA2	M	1942.19	0.4	M	2117.57	0.5	M	1375.17	-0.1	M	1395.77	-0.1	M	1803.66	0.3	M	1113.91	-0.4	L	669.63	-1.2	M	1560.7	0.1	M	1386.9	-0.1	M	1500.63	0
ENSOCUG00000011812	ING2	M	213.79	-0.4	M	177.7	-0.6	M	163.71	-0.7	M	175.64	-0.6	L	126.96	-1.1	L	140.68	-1.0	M	230.85	-0.2	M	202.58	-0.4	M	201.45	-0.4	M	274.13	0
ENSOCUG00000011823	HILPDA	M	30.82	-0.2	L	19.95	-0.8	L	16.99	-1.0	M	26.86	-0.3	L	20.37	-0.8	M	35.74	0.1	M	30.35	-0.2	M	25.59	-0.4	M	22.78	-0.6	M	34.34	0
ENSOCUG00000011934	EPHX1	M	1448.88	-0.2	L	701.74	-1.2	L	477.46	-1.8	L	489.66	-1.7	L	512.27	-1.7	L	503.77	-1.7	M	1434.84	-0.2	L	420.98	-2.0	L	527.2	-1.6	M	1638.35	0
ENSOCUG00000011935	PPTC7	M	281.82	0.4	H	349.74	0.8	H	362.35	0.8	H	431.41	1.1	H	413.52	1.0	H	419.74	1.0	M	242.69	0.2	H	405.69	1.0	H	365.59	0.8	M	205.55	0
ENSOCUG00000011964	TSSK3	M	59.94	0.2	L	26.13	-1.0	L	15.82	-1.7	M	30.48	-0.7	L	18.59	-1.5	L	18.94	-1.4	M	47.75	-0.1	L	17.96	-1.5	L	25.33	-1.0	M	50.82	0
ENSOCUG00000012015	CSNK1G1	M	16.64	0.0	M	24.63	0.6	M	20.94	0.4	H	29.93	0.9	H	33.75	1.0	M	23.0	0.5	M	26.97	0.7	H	31.63	1.0	H	31.73	1.0	M	15.62	0
ENSOCUG00000012028	PIM1	M	76.61	-0.3	M	70.11	-0.4	M	65.32	-0.6	M	58.93	-0.7	L	38.48	-1.3	M	73.35	-0.4	L	48.83	-1.0	L	46.6	-1.0	M	64.9	-0.6	M	95.35	0
ENSOCUG00000012046	SNX24	M	104.26	0.3	M	66.14	-0.3	M	61.46	-0.4	M	66.91	-0.3	L	40.67	-1.0	M	55.95	-0.6	M	53.7	-0.6	L	36.27	-1.2	M	56.19	-0.6	M	82.1	0
ENSOCUG00000012093	SLC36A1	M	17.96	0.4	M	17.24	0.4	H	27.61	1.0	H	23.29	0.8	M	18.54	0.5	H	25.63	0.9	H	22.43	0.8	M	17.21	0.4	H	24.55	0.9	M	13.36	0
ENSOCUG00000012185	CRACD	M	28.83	-0.2	L	12.39	-1.5	L	12.64	-1.4	M	28.66	-0.2	M	25.64	-0.4	L	14.53	-1.2	M	27.74	-0.3	L	13.17	-1.4	L	8.11	-2.0	M	34.14	0
ENSOCUG00000012304	ENSOCUG00000012304	M	55.54	-0.4	M	55.86	-0.4	L	34.69	-1.1	L	34.12	-1.1	L	38.46	-0.9	L	33.04	-1.1	L	33.9	-1.1	L	38.5	-0.9	M	47.8	-0.6	M	71.91	0
ENSOCUG00000012328	RNF128	M	18.22	-0.2	M	18.37	-0.2	L	10.23	-1.0	L	9.89	-1.1	M	12.92	-0.7	L	7.47	-1.4	L	10.92	-0.9	L	12.26	-0.8	L	10.48	-1.0	M	20.53	0
ENSOCUG00000012400	PTH1R	M	30.58	0.2	H	45.65	0.8	H	52.3	1.0	M	36.12	0.4	M	39.96	0.6	H	49.91	0.9	H	74.82	1.5	M	44.94	0.7	H	47.77	0.8	M	27.25	0
ENSOCUG00000012411	UHMK1	M	18.56	0.2	M	25.87	0.7	H	29.57	0.8	H	28.71	0.8	H	42.48	1.4	M	24.73	0.6	M	21.27	0.4	H	30.48	0.9	M	23.38	0.5	M	16.39	0
ENSOCUG00000012441	PCGF6	M	88.93	-0.2	L	56.19	-0.9	L	49.43	-1.1	L	46.77	-1.2	L	61.62	-0.8	M	67.8	-0.6	M	98.56	-0.1	L	59.16	-0.8	M	68.7	-0.6	M	104.23	0
ENSOCUG00000012473	ANKAR	M	9.47	-0.4	M	18.32	0.6	M	15.31	0.3	M	14.84	0.3	L	3.37	-1.7	M	11.56	-0.1	M	10.28	-0.2	M	12.39	0.0	L	3.7	-1.7	M	12.15	0
ENSOCUG00000012491	OSGEPL1	M	159.84	-0.1	L	81.65	-1.1	M	181.43	0.1	M	164.16	-0.1	M	245.35	0.5	M	152.71	-0.2	M	135.31	-0.4	M	170.39	-0.0	M	211.15	0.3	M	173.39	0
ENSOCUG00000012530	NPNT	M	23.38	-0.4	M	39.23	0.4	H	50.99	0.8	H	53.62	0.9	M	47.52	0.7	M	42.06	0.5	H	79.06	1.4	H	54.72	0.9	H	51.34	0.8	M	29.78	0
ENSOCUG00000012532	ANXA7	M	3639.75	0.1	M	2684.79	-0.4	L	1694.98	-1.0	M	2565.88	-0.4	M	2648.69	-0.4	M	2178.16	-0.7	M	4170.94	0.3	M	3069.06	-0.2	M	2774.96	-0.3	M	3480.26	0
ENSOCUG00000012610	CDON	M	60.02	-0.3	M	91.56	0.3	H	148.72	1.0	M	121.16	0.7	M	96.89	0.4	M	117.32	0.7	M	108.05	0.6	M	113.86	0.7	M	112.92	0.6	M	71.87	0
ENSOCUG00000012690	HSPB1	M	1086.97	0.3	H	1522.32	0.8	M	1441.82	0.7	M	1185.43	0.4	M	1168.97	0.4	H	2088.68	1.2	M	1017.6	0.2	M	1370.09	0.6	M	1418.66	0.7	M	882.49	0
ENSOCUG00000012696	PAFAH2	M	22.62	-0.4	M	24.12	-0.3	M	21.6	-0.5	L	15.76	-1.0	L	17.73	-0.8	M	20.87	-0.5	L	11.39	-1.4	L	14.04	-1.1	L	15.03	-1.0	M	30.82	0
ENSOCUG00000012719	HSPA12B	M	83.37	-0.0	H	170.1	1.0	H	186.3	1.1	H	161.55	0.9	H	156.97	0.9	H	190.8	1.2	M	116.93	0.4	H	168.51	1.0	H	175.56	1.0	M	84.99	0
ENSOCUG00000012833	ENSOCUG00000012833	M	5.0	-0.4	M	8.12	0.2	H	20.98	1.6	M	10.74	0.7	M	7.22	0.1	M	6.77	-0.0	H	12.35	0.8	M	9.74	0.5	M	11.03	0.7	M	6.75	0
ENSOCUG00000012916	P3H3	M	84.78	-0.0	M	116.52	0.5	H	190.05	1.2	M	126.86	0.6	M	97.69	0.2	M	142.04	0.7	H	145.52	0.8	M	109.11	0.4	M	136.41	0.7	M	85.32	0
ENSOCUG00000013296	GADD45G	M	397.6	-0.4	L	261.49	-1.0	M	483.91	-0.1	L	220.5	-1.2	M	349.42	-0.6	L	159.9	-1.7	M	644.8	0.3	M	318.72	-0.7	L	150.62	-1.8	M	522.72	0
ENSOCUG00000013407	GPRC5C	M	632.32	-0.1	M	450.45	-0.6	L	313.79	-1.1	L	369.51	-0.9	L	320.72	-1.1	M	409.68	-0.7	M	563.29	-0.3	L	328.47	-1.1	L	345.61	-1.0	M	686.38	0
ENSOCUG00000013429	NHSL1	M	8.55	0.0	H	13.9	0.8	H	20.99	1.3	H	14.11	0.8	M	11.54	0.5	H	15.43	0.9	M	13.82	0.7	M	8.93	0.1	H	16.59	1.0	M	8.16	0
ENSOCUG00000013509	SKIL	M	93.96	0.1	M	150.89	0.7	M	147.42	0.7	H	153.29	0.8	H	186.76	1.0	M	91.32	0.0	M	113.99	0.3	H	205.11	1.2	M	129.96	0.5	M	89.67	0
ENSOCUG00000013513	LBH	M	6.6	-0.2	H	15.9	1.1	H	12.98	0.8	H	14.01	0.9	H	13.12	0.8	H	20.91	1.5	M	8.31	0.0	M	12.7	0.7	M	9.66	0.3	M	7.65	0
ENSOCUG00000013517	NCKAP1L	M	25.16	-0.1	H	47.82	0.9	H	86.39	1.7	H	53.42	1.0	H	49.74	0.9	H	55.11	1.1	H	47.98	0.9	M	34.64	0.4	H	54.65	1.0	M	26.07	0
ENSOCUG00000013527	ABHD2	M	14.37	-0.3	M	20.48	0.2	H	42.89	1.2	M	23.48	0.4	M	24.99	0.5	H	34.67	0.9	M	19.46	0.1	M	21.79	0.3	M	23.82	0.4	M	18.02	0
ENSOCUG00000013554	CALR3	M	20.96	0.3	M	14.11	-0.3	M	11.17	-0.7	M	13.86	-0.3	M	12.18	-0.6	L	8.51	-1.0	M	19.35	0.1	L	7.48	-1.2	M	11.92	-0.5	M	17.43	0
ENSOCUG00000013695	RNF19B	M	291.33	-0.3	M	221.82	-0.7	L	182.88	-1.0	L	216.24	-0.8	L	209.09	-0.8	L	198.31	-0.9	M	323.29	-0.2	L	201.85	-0.9	L	197.33	-0.9	M	368.74	0
ENSOCUG00000013726	EFNB1	M	40.52	-0.0	M	62.22	0.6	H	92.79	1.2	H	81.13	1.0	H	74.94	0.9	H	83.93	1.0	H	69.07	0.8	H	74.98	0.9	M	53.93	0.4	M	41.46	0
ENSOCUG00000013795	INSIG1	M	159.37	0.1	H	381.27	1.4	H	572.64	2.0	H	488.29	1.8	H	925.04	2.7	H	352.55	1.3	M	112.74	-0.3	H	562.35	2.0	H	497.39	1.8	M	143.61	0
ENSOCUG00000013817	EXD1	M	28.05	0.2	M	25.02	-0.0	M	18.44	-0.4	M	19.64	-0.3	M	23.05	-0.1	L	12.66	-1.0	M	22.82	-0.2	L	13.11	-1.0	M	18.28	-0.5	M	25.41	0
ENSOCUG00000013978	PLCL1	M	100.68	-0.4	L	68.71	-0.9	M	89.1	-0.5	M	81.62	-0.6	M	101.74	-0.4	L	63.2	-1.0	M	81.21	-0.6	M	92.45	-0.5	L	68.86	-0.9	M	129.2	0
ENSOCUG00000014016	ENSOCUG00000014016	M	75.25	-0.1	M	47.8	-0.7	M	48.5	-0.7	L	39.54	-1.0	L	39.81	-1.0	L	38.68	-1.0	M	65.76	-0.2	L	35.63	-1.1	M	46.66	-0.7	M	79.01	0
ENSOCUG00000014019	SPIRE2	M	37.92	0.2	M	21.83	-0.6	M	25.25	-0.4	M	19.95	-0.7	L	18.32	-0.9	M	28.71	-0.2	M	28.58	-0.2	L	17.0	-1.0	M	20.7	-0.7	M	34.34	0
ENSOCUG00000014083	LZTS1	M	92.18	-0.4	M	179.14	0.6	H	246.79	1.0	M	163.92	0.4	M	164.64	0.4	M	117.31	-0.1	M	145.47	0.2	M	145.63	0.3	M	137.21	0.2	M	122.48	0
ENSOCUG00000014110	ENSOCUG00000014110	M	16.69	-0.4	L	5.04	-2.2	M	33.49	0.5	L	7.56	-1.6	L	7.74	-1.6	M	15.67	-0.5	H	39.79	0.8	L	4.06	-2.5	M	23.72	0.1	M	22.73	0
ENSOCUG00000014127	TNFRSF1B	M	28.09	0.1	M	40.76	0.6	H	69.7	1.4	M	31.02	0.2	M	34.17	0.4	H	87.05	1.7	M	35.51	0.4	M	37.18	0.5	M	36.0	0.4	M	26.76	0
ENSOCUG00000014147	ENSOCUG00000014147	M	71.06	0.4	H	89.11	0.8	H	141.06	1.4	M	78.55	0.6	H	117.89	1.2	H	136.12	1.4	M	47.08	-0.2	H	112.19	1.1	H	91.87	0.8	M	52.26	0
ENSOCUG00000014245	METRNL	M	36.97	0.1	M	52.92	0.6	H	89.66	1.4	H	88.8	1.3	H	70.13	1.0	H	71.41	1.0	M	38.59	0.1	M	55.9	0.7	M	48.61	0.5	M	34.83	0
ENSOCUG00000014264	ZNF202	M	148.13	0.4	M	169.65	0.6	M	187.42	0.7	H	230.45	1.0	H	227.33	1.0	H	222.73	1.0	M	142.78	0.3	H	210.85	0.9	M	188.55	0.7	M	114.09	0
ENSOCUG00000014277	ABHD4	M	965.11	-0.4	L	666.99	-0.9	L	649.19	-1.0	L	681.06	-0.9	L	599.26	-1.1	L	694.93	-0.9	M	1180.3	-0.1	L	639.42	-1.0	L	673.63	-0.9	M	1258.94	0
ENSOCUG00000014294	ENSOCUG00000014294	M	183.36	0.4	H	238.5	0.8	H	302.74	1.2	M	179.68	0.4	M	183.3	0.4	H	296.63	1.1	H	297.94	1.1	M	173.88	0.3	M	144.9	0.1	M	136.38	0
ENSOCUG00000014315	ENSOCUG00000014315	M	197.47	-0.1	M	201.94	-0.0	M	166.73	-0.3	M	130.82	-0.7	M	190.38	-0.1	M	135.47	-0.6	L	99.34	-1.0	M	199.58	-0.1	M	164.94	-0.3	M	207.12	0
ENSOCUG00000014333	SLC25A21	M	32.55	-0.4	L	22.35	-0.9	M	31.04	-0.4	L	17.54	-1.2	L	24.73	-0.8	M	26.74	-0.7	L	25.06	-0.8	L	24.48	-0.8	M	26.12	-0.7	M	42.42	0
ENSOCUG00000014347	SQOR	M	630.1	0.0	M	500.33	-0.3	L	278.92	-1.1	L	331.3	-0.9	L	329.79	-0.9	L	302.79	-1.0	M	468.66	-0.4	M	459.41	-0.4	M	462.43	-0.4	M	614.19	0
ENSOCUG00000014352	GATM	M	284.46	-0.2	H	719.08	1.1	M	344.42	0.1	M	352.43	0.1	H	658.56	1.0	M	462.98	0.5	M	496.22	0.6	H	643.26	1.0	H	565.03	0.8	M	328.06	0
ENSOCUG00000014367	SGK1	M	1019.79	-0.4	M	1759.64	0.4	M	1633.99	0.3	M	1578.64	0.2	M	1338.44	-0.0	M	1181.09	-0.2	L	569.3	-1.2	M	1540.06	0.2	M	2222.24	0.7	M	1350.88	0
ENSOCUG00000014385	CPQ	M	43.37	0.1	M	56.07	0.4	H	84.66	1.0	M	57.24	0.5	M	57.56	0.5	M	55.96	0.4	M	62.79	0.6	M	56.65	0.4	M	55.72	0.4	M	41.67	0
ENSOCUG00000014388	ZCWPW1	M	19.09	0.2	M	11.09	-0.6	M	12.44	-0.4	M	12.68	-0.3	L	9.38	-0.8	M	11.16	-0.5	M	14.91	-0.1	L	7.59	-1.1	L	8.54	-0.9	M	16.37	0
ENSOCUG00000014554	ATP6V0E2	M	20.24	0.3	M	13.91	-0.2	M	24.11	0.5	H	28.19	0.8	L	7.2	-1.1	M	9.55	-0.7	M	21.66	0.4	M	19.15	0.2	M	9.96	-0.7	M	16.84	0
ENSOCUG00000014569	OTUD4	M	163.54	0.1	M	212.8	0.5	H	258.64	0.8	H	270.41	0.8	H	293.23	1.0	M	190.97	0.3	M	246.38	0.7	H	316.94	1.1	M	239.46	0.7	M	150.32	0
ENSOCUG00000014577	SYT7	M	9.83	-0.4	M	15.82	0.3	M	21.25	0.7	H	26.67	1.0	M	17.04	0.4	H	24.56	0.9	M	17.39	0.4	H	23.05	0.8	M	16.57	0.4	M	12.94	0
ENSOCUG00000014723	ATG14	M	146.64	-0.3	M	127.02	-0.5	L	82.33	-1.2	L	100.77	-0.9	L	87.94	-1.1	L	94.04	-1.0	M	165.78	-0.2	L	99.12	-0.9	M	118.25	-0.6	M	185.36	0
ENSOCUG00000014762	ENSOCUG00000014762	M	21.02	-0.4	H	51.56	0.9	H	75.37	1.4	H	80.81	1.5	H	59.23	1.0	H	69.82	1.3	M	29.8	0.1	H	61.62	1.1	H	60.36	1.1	M	28.47	0
ENSOCUG00000014777	PADI2	M	6606.76	0.3	H	9078.19	0.8	H	9761.06	0.9	H	11519.59	1.1	M	8204.17	0.7	M	6995.24	0.4	M	5543.53	0.1	M	8378.73	0.7	M	7108.42	0.4	M	5218.76	0
ENSOCUG00000014830	FAM76A	M	340.77	0.0	M	214.74	-0.7	L	199.86	-0.8	M	227.97	-0.6	M	258.44	-0.4	M	221.07	-0.6	L	169.26	-1.0	M	245.7	-0.5	M	216.96	-0.7	M	339.74	0
ENSOCUG00000014852	ENSOCUG00000014852	M	186.19	0.3	M	140.57	-0.1	M	110.09	-0.5	L	70.53	-1.2	M	96.86	-0.7	M	102.03	-0.6	L	53.47	-1.5	L	79.79	-1.0	M	107.25	-0.5	M	155.78	0
ENSOCUG00000014904	EPAS1	M	550.58	-0.2	H	1178.17	0.9	H	1260.19	1.0	H	1281.46	1.0	H	1125.67	0.8	H	1209.7	0.9	M	618.44	-0.0	H	1098.65	0.8	H	1136.86	0.8	M	630.78	0
ENSOCUG00000014953	SYNE3	M	29.87	0.2	H	45.84	0.9	H	55.18	1.1	H	44.12	0.8	M	33.79	0.4	H	53.42	1.1	H	43.75	0.8	M	35.28	0.5	H	46.94	0.9	M	25.55	0
ENSOCUG00000015013	CCNYL1	M	226.25	0.4	H	362.29	1.1	M	242.63	0.5	H	298.71	0.8	M	263.93	0.6	M	209.95	0.3	M	242.41	0.5	M	267.97	0.7	H	288.95	0.8	M	169.28	0
ENSOCUG00000015077	SCLT1	M	13.63	0.1	M	7.91	-0.6	M	10.99	-0.1	L	4.24	-1.4	M	8.26	-0.6	M	9.22	-0.4	M	9.16	-0.4	M	13.72	0.2	L	5.33	-1.2	M	12.24	0
ENSOCUG00000015080	UTRN	M	170.45	-0.3	M	316.02	0.6	H	387.92	0.9	M	262.8	0.3	H	400.39	0.9	M	290.13	0.5	M	291.5	0.5	H	425.51	1.0	H	357.33	0.8	M	207.91	0
ENSOCUG00000015126	FRMD6	M	56.31	0.1	M	87.44	0.7	H	111.48	1.1	H	90.62	0.8	H	101.44	0.9	H	99.56	0.9	M	63.0	0.2	M	73.75	0.5	H	110.26	1.1	M	52.48	0
ENSOCUG00000015140	DACT1	M	57.89	-0.1	H	122.91	1.0	H	199.42	1.7	H	135.64	1.1	H	115.26	0.9	H	128.53	1.0	M	77.71	0.3	H	125.91	1.0	H	119.17	0.9	M	63.15	0
ENSOCUG00000015168	PLB1	M	36.48	0.0	M	35.41	-0.0	M	23.68	-0.6	M	28.42	-0.3	L	16.15	-1.2	L	17.37	-1.1	M	35.51	0.0	M	26.43	-0.4	L	17.57	-1.0	M	35.96	0
ENSOCUG00000015229	ATAD5	M	14.62	-0.0	M	13.19	-0.1	M	10.5	-0.5	M	17.11	0.2	L	8.24	-0.8	L	6.13	-1.3	M	12.97	-0.1	M	14.29	-0.0	M	17.29	0.3	M	14.23	0
ENSOCUG00000015244	ENSOCUG00000015244	M	50.74	-0.0	M	32.43	-0.7	L	24.54	-1.1	L	15.75	-1.7	M	34.21	-0.6	L	26.93	-1.0	M	35.62	-0.6	M	51.13	-0.0	L	16.48	-1.7	M	52.4	0
ENSOCUG00000015263	IFRD1	M	384.31	0.2	M	280.88	-0.2	H	631.12	0.9	H	652.83	1.0	M	522.16	0.6	H	670.59	1.0	M	505.46	0.6	M	470.97	0.5	M	375.35	0.2	M	334.16	0
ENSOCUG00000015267	GPX8	M	32.63	-0.4	M	69.07	0.6	H	99.36	1.2	H	74.65	0.8	M	69.41	0.7	M	68.32	0.6	M	59.76	0.4	H	86.34	1.0	H	85.25	0.9	M	44.37	0
ENSOCUG00000015377	ANGPT2	M	19.36	-0.1	H	44.12	1.1	H	34.67	0.8	M	32.03	0.7	H	36.9	0.8	H	45.14	1.1	M	26.85	0.3	H	55.5	1.4	H	42.37	1.0	M	20.59	0
ENSOCUG00000015401	MXI1	M	487.77	-0.2	M	374.13	-0.5	L	270.4	-1.0	M	336.29	-0.7	L	319.62	-0.8	L	284.29	-0.9	M	436.27	-0.3	L	323.76	-0.8	L	304.71	-0.8	M	546.24	0
ENSOCUG00000015409	TCP11L1	M	105.55	-0.1	M	73.89	-0.6	L	64.18	-0.9	M	80.05	-0.5	L	62.9	-0.9	M	69.96	-0.7	M	106.75	-0.1	L	55.84	-1.1	L	52.59	-1.1	M	115.63	0
ENSOCUG00000015417	CSTF3	M	138.12	0.2	H	199.91	0.8	M	182.46	0.6	M	154.72	0.4	H	205.28	0.8	M	186.62	0.7	M	142.8	0.3	H	212.86	0.9	H	238.53	1.0	M	117.46	0
ENSOCUG00000015445	SQSTM1	M	6235.59	-0.3	L	4236.94	-0.8	L	3718.9	-1.0	M	4981.2	-0.6	L	3705.84	-1.0	L	4373.39	-0.8	M	5594.6	-0.4	L	3463.81	-1.1	L	4148.31	-0.8	M	7446.89	0
ENSOCUG00000015463	MGAT2	M	60.71	0.3	M	72.04	0.6	H	89.8	0.9	H	96.58	1.0	M	73.83	0.6	M	74.39	0.6	M	65.05	0.4	M	70.08	0.6	M	70.51	0.6	M	47.96	0
ENSOCUG00000015498	EFCAB11	M	19.31	-0.2	L	10.19	-1.1	M	14.98	-0.5	M	18.19	-0.3	M	14.29	-0.7	M	20.18	-0.1	L	11.34	-0.9	L	12.8	-0.8	M	16.6	-0.4	M	21.76	0
ENSOCUG00000015516	HOXC4	M	14.99	0.1	M	14.61	0.1	H	29.58	1.1	M	11.19	-0.3	M	11.05	-0.2	H	23.82	0.8	M	19.06	0.4	M	13.86	0.0	M	15.51	0.2	M	14.04	0
ENSOCUG00000015595	CDK8	M	47.39	0.4	H	63.1	0.8	H	82.53	1.2	H	65.47	0.8	H	83.24	1.2	H	65.84	0.8	M	35.77	-0.0	H	77.91	1.1	M	60.52	0.7	M	36.83	0
ENSOCUG00000015613	TPST1	M	44.02	-0.3	M	85.46	0.7	H	108.31	1.0	M	71.7	0.5	H	88.28	0.8	H	92.21	0.8	M	70.22	0.4	H	93.02	0.8	H	96.27	0.9	M	52.96	0
ENSOCUG00000015644	DEF6	M	8.17	-0.3	M	14.22	0.5	M	15.99	0.7	M	13.82	0.4	M	16.3	0.7	H	21.64	1.1	H	18.75	0.8	M	11.91	0.2	M	11.78	0.2	M	10.32	0
ENSOCUG00000015685	SSX2IP	M	21.91	0.1	M	14.16	-0.6	M	14.35	-0.5	M	16.06	-0.3	M	21.56	0.0	L	9.43	-1.2	M	18.95	-0.2	M	17.08	-0.3	M	21.84	0.0	M	20.86	0
ENSOCUG00000015691	SLC2A11	M	22.16	-0.1	L	11.07	-1.1	M	20.08	-0.3	M	21.68	-0.2	M	16.58	-0.5	M	17.29	-0.4	M	15.1	-0.6	M	18.44	-0.4	M	19.0	-0.3	M	23.62	0
ENSOCUG00000015769	RADIL	M	40.34	0.4	M	44.51	0.6	H	57.68	1.0	M	35.67	0.3	M	38.86	0.4	H	66.12	1.2	H	58.03	0.9	M	33.88	0.2	H	53.24	0.8	M	30.03	0
ENSOCUG00000015771	SQLE	M	14.97	-0.2	H	30.9	0.8	H	35.82	1.1	H	32.4	0.9	H	37.29	1.1	M	24.63	0.5	M	18.15	0.1	H	32.0	0.9	M	27.89	0.7	M	17.53	0
ENSOCUG00000015799	ENSOCUG00000015799	M	30.85	-0.3	M	25.29	-0.6	M	25.58	-0.6	M	28.98	-0.4	L	18.55	-1.0	M	22.58	-0.7	M	25.6	-0.6	L	18.98	-1.0	L	16.93	-1.1	M	38.11	0
ENSOCUG00000015864	ABLIM1	M	155.01	-0.4	M	263.14	0.4	H	650.53	1.7	M	242.99	0.2	M	307.67	0.6	H	439.15	1.1	M	305.2	0.6	M	284.74	0.5	M	300.5	0.6	M	204.94	0
ENSOCUG00000015875	RFTN1	M	442.3	0.1	H	915.49	1.2	H	858.68	1.1	H	905.27	1.1	H	959.35	1.2	H	709.41	0.8	M	375.05	-0.1	H	934.69	1.2	H	987.18	1.3	M	412.27	0
ENSOCUG00000015888	FBXO31	M	1442.51	-0.1	M	903.78	-0.7	L	740.74	-1.0	M	969.21	-0.6	L	668.79	-1.2	L	843.28	-0.8	M	1313.09	-0.2	L	618.87	-1.3	L	742.16	-1.0	M	1499.74	0
ENSOCUG00000015904	TKT	M	77.95	0.3	M	101.58	0.7	H	129.22	1.1	M	97.86	0.7	M	90.19	0.5	M	86.34	0.5	M	65.98	0.1	M	84.02	0.4	M	83.04	0.4	M	61.71	0
ENSOCUG00000015909	HBEGF	M	79.33	-0.4	H	195.51	0.9	H	258.81	1.3	H	247.28	1.3	M	169.87	0.7	H	305.35	1.6	M	87.54	-0.2	M	116.94	0.2	M	102.3	-0.0	M	102.43	0
ENSOCUG00000015928	WNK4	M	96.7	0.0	L	51.64	-0.9	L	46.14	-1.1	M	64.09	-0.6	M	60.99	-0.7	M	72.87	-0.4	M	107.65	0.2	L	49.1	-1.0	L	53.11	-0.9	M	96.75	0
ENSOCUG00000016050	TMEM131L	M	184.6	0.2	M	248.13	0.6	M	247.27	0.6	M	245.12	0.6	M	224.38	0.4	H	337.58	1.0	H	291.66	0.8	M	231.55	0.5	M	229.0	0.5	M	165.21	0
ENSOCUG00000016144	ATG13	M	307.49	-0.2	M	218.86	-0.7	L	187.73	-0.9	M	241.53	-0.6	M	231.95	-0.6	M	234.37	-0.6	M	277.25	-0.4	L	208.85	-0.8	L	174.83	-1.0	M	356.39	0
ENSOCUG00000016259	DDIT4L	M	3656.65	-0.3	L	1041.93	-2.1	L	490.72	-3.2	L	757.5	-2.6	L	597.54	-2.9	L	983.86	-2.2	M	3545.41	-0.3	L	432.62	-3.4	L	748.93	-2.6	M	4506.51	0
ENSOCUG00000016268	RCN1	M	200.53	-0.3	H	687.46	1.5	H	699.96	1.5	H	650.86	1.4	H	596.91	1.3	H	468.87	0.9	M	272.98	0.2	H	693.92	1.5	H	671.03	1.5	M	242.58	0
ENSOCUG00000016328	FAM151B	M	23.67	0.2	L	10.98	-0.9	M	17.96	-0.2	L	12.25	-0.8	L	9.16	-1.2	M	12.49	-0.7	M	14.84	-0.5	M	12.53	-0.7	M	14.11	-0.6	M	20.87	0
ENSOCUG00000016426	AGER	M	9.72	-0.3	M	14.61	0.3	H	21.3	0.8	M	17.12	0.5	H	20.63	0.8	H	30.73	1.4	M	16.97	0.5	M	19.14	0.7	M	16.34	0.4	M	11.95	0
ENSOCUG00000016500	ENSOCUG00000016500	M	10.82	-0.4	M	9.33	-0.6	M	12.4	-0.2	L	8.04	-0.8	M	9.56	-0.6	L	5.39	-1.4	L	7.98	-0.8	M	10.37	-0.5	M	9.22	-0.6	M	13.96	0
ENSOCUG00000016584	PLEKHA5	M	25.82	0.3	M	26.61	0.4	H	55.41	1.4	M	33.63	0.7	M	27.21	0.4	M	33.2	0.7	H	37.92	0.8	M	31.4	0.6	H	39.19	0.9	M	20.4	0
ENSOCUG00000016643	ITGB1BP2	M	508.81	0.2	H	998.03	1.1	M	738.97	0.7	M	736.42	0.7	H	917.12	1.0	H	880.0	0.9	M	588.76	0.4	H	1045.5	1.2	H	921.28	1.0	M	458.82	0
ENSOCUG00000016703	TRERF1	M	12.17	0.3	M	15.2	0.6	H	28.89	1.5	H	20.09	1.0	H	16.61	0.8	M	15.43	0.7	H	16.97	0.8	H	19.58	1.0	M	13.69	0.4	M	9.63	0
ENSOCUG00000016767	ANAPC16	M	457.69	-0.4	L	317.93	-0.9	L	295.05	-1.0	L	284.27	-1.1	L	314.47	-0.9	M	359.3	-0.7	M	500.47	-0.3	L	348.7	-0.8	M	376.1	-0.7	M	600.08	0
ENSOCUG00000016789	DENND2C	M	50.26	-0.0	M	50.91	-0.0	H	86.93	0.8	H	93.97	0.9	H	125.62	1.3	H	90.89	0.8	M	84.61	0.7	H	88.23	0.8	H	111.47	1.1	M	50.86	0
ENSOCUG00000016806	ENSOCUG00000016806	M	10.85	-0.3	L	7.37	-0.8	M	10.91	-0.3	L	7.37	-0.9	M	9.47	-0.5	L	6.21	-1.2	M	10.79	-0.3	L	5.65	-1.3	M	8.34	-0.7	M	13.61	0
ENSOCUG00000016906	KCNQ5	M	25.86	0.0	M	25.12	-0.0	M	29.95	0.2	L	9.77	-1.4	M	25.72	0.0	M	24.68	-0.1	M	20.99	-0.3	M	29.41	0.2	M	25.71	-0.0	M	25.73	0
ENSOCUG00000016984	WWC2	M	73.27	0.1	M	88.66	0.4	H	132.29	1.0	M	95.49	0.5	H	129.88	0.9	M	110.49	0.7	H	134.9	1.0	H	140.04	1.0	H	120.39	0.8	M	67.1	0
ENSOCUG00000017009	ENSOCUG00000017009	M	5.42	-0.1	L	1.04	-2.5	M	5.14	-0.2	M	4.17	-0.4	M	4.47	-0.3	M	3.92	-0.5	M	4.9	-0.2	M	3.9	-0.6	M	5.97	0.1	M	5.73	0
ENSOCUG00000017069	CDK5RAP1	M	267.58	-0.4	M	259.37	-0.4	M	253.19	-0.4	L	187.04	-0.9	M	226.32	-0.6	M	208.36	-0.7	M	238.75	-0.5	L	166.12	-1.0	M	244.05	-0.5	M	343.43	0
ENSOCUG00000017109	TTC39C	M	61.0	0.2	L	9.7	-2.5	L	28.26	-0.9	M	49.01	-0.1	M	37.18	-0.5	L	13.73	-2.0	M	48.54	-0.1	M	39.19	-0.5	L	13.26	-2.0	M	54.01	0
ENSOCUG00000017145	B3GAT2	M	7.08	-0.2	M	9.75	0.3	H	22.23	1.4	H	20.31	1.3	H	16.45	1.0	M	13.26	0.7	M	7.8	-0.1	M	5.02	-0.7	M	5.87	-0.4	M	7.84	0
ENSOCUG00000017218	SLC35B4	M	16.07	-0.4	H	38.62	0.8	H	55.27	1.3	H	46.44	1.1	H	46.98	1.1	H	52.55	1.3	M	23.64	0.2	H	46.32	1.1	H	48.08	1.2	M	21.31	0
ENSOCUG00000017294	DNAJC30	M	78.29	-0.3	M	65.28	-0.6	M	61.41	-0.7	M	62.76	-0.7	M	64.21	-0.6	M	75.48	-0.4	M	67.84	-0.5	L	55.0	-0.9	L	46.56	-1.1	M	98.69	0
ENSOCUG00000017368	ENSOCUG00000017368	M	1826.41	0.2	M	1822.96	0.2	H	3892.12	1.3	M	1327.01	-0.2	M	1454.36	-0.1	H	5123.29	1.7	M	2294.71	0.6	M	1401.18	-0.1	M	1775.73	0.2	M	1549.1	0
ENSOCUG00000017379	ZNF365	M	7.81	-0.1	M	13.61	0.7	H	22.57	1.4	M	6.17	-0.5	M	13.78	0.7	H	14.86	0.8	M	9.38	0.1	M	11.85	0.5	M	14.12	0.7	M	8.66	0
ENSOCUG00000017593	CCDC71	M	109.93	-0.2	L	60.57	-1.1	L	57.71	-1.2	L	60.51	-1.1	L	75.47	-0.8	L	55.53	-1.2	M	101.55	-0.4	M	78.87	-0.7	M	77.86	-0.7	M	130.16	0
ENSOCUG00000017626	ITGAV	M	67.48	-0.0	H	122.94	0.8	M	110.07	0.7	M	103.17	0.6	M	112.78	0.7	M	66.53	-0.1	H	146.49	1.1	M	116.14	0.7	M	94.86	0.5	M	68.8	0
ENSOCUG00000017663	CLIP2	M	80.04	0.4	M	79.6	0.4	H	128.04	1.0	M	91.52	0.6	M	69.19	0.1	M	91.78	0.6	H	136.46	1.1	M	86.11	0.5	M	83.0	0.4	M	62.38	0
ENSOCUG00000017706	ATL1	M	11.1	0.2	M	13.62	0.5	H	30.24	1.7	M	13.88	0.5	M	11.51	0.3	M	13.5	0.5	H	17.35	0.8	H	17.87	0.9	M	14.38	0.6	M	9.59	0
ENSOCUG00000017775	ADAMTS14	M	14.81	-0.2	M	25.1	0.6	H	33.26	1.0	H	34.8	1.0	M	22.39	0.4	H	30.22	0.8	M	27.86	0.7	M	21.55	0.4	M	23.93	0.5	M	16.59	0
ENSOCUG00000017805	CAPRIN2	M	115.04	0.2	M	70.71	-0.5	L	51.99	-0.9	M	72.65	-0.5	L	51.94	-0.9	L	58.69	-0.8	M	86.39	-0.2	L	39.56	-1.3	L	43.18	-1.2	M	100.5	0
ENSOCUG00000017838	ZFP14	M	10.82	0.3	M	11.52	0.3	M	14.84	0.7	M	12.35	0.5	H	18.28	1.0	M	13.5	0.6	H	17.14	0.9	H	16.18	0.9	H	20.18	1.2	M	9.08	0
ENSOCUG00000017857	BICD1	M	59.59	-0.1	M	70.5	0.2	H	142.99	1.2	M	90.28	0.5	M	75.61	0.3	M	68.14	0.1	M	78.75	0.3	M	102.36	0.7	M	96.07	0.6	M	62.89	0
ENSOCUG00000017864	WDR73	M	79.32	-0.2	L	50.34	-0.9	M	64.73	-0.5	M	68.46	-0.4	L	40.34	-1.2	M	63.65	-0.6	M	67.04	-0.5	L	42.91	-1.1	L	41.63	-1.2	M	93.86	0
ENSOCUG00000020933	RDH13	M	55.15	-0.1	M	52.57	-0.2	L	33.45	-0.8	M	44.68	-0.4	L	34.48	-0.8	M	44.85	-0.4	M	41.59	-0.5	L	25.35	-1.2	M	48.12	-0.3	M	59.91	0
ENSOCUG00000020951	ENSOCUG00000020951	M	94.21	-0.1	L	51.43	-1.0	L	46.78	-1.1	L	57.9	-0.9	L	50.98	-1.0	L	59.51	-0.8	M	82.99	-0.3	L	53.2	-1.0	L	50.64	-1.0	M	103.57	0
ENSOCUG00000021137	SFRP5	M	40.34	-0.2	L	21.13	-1.1	L	23.15	-0.9	L	13.5	-1.7	L	17.8	-1.3	M	35.99	-0.3	L	24.49	-0.9	L	14.09	-1.7	L	15.73	-1.5	M	45.25	0
ENSOCUG00000021304	MYL12A	M	488.69	-0.3	M	620.01	0.1	H	1315.01	1.1	M	542.91	-0.1	M	639.73	0.1	H	1415.36	1.2	M	543.1	-0.1	M	774.98	0.4	M	728.85	0.3	M	597.54	0
ENSOCUG00000021380	SMCO1	M	784.21	-0.0	L	456.4	-0.8	L	362.41	-1.1	L	392.03	-1.0	L	407.43	-1.0	L	425.11	-0.9	M	584.25	-0.4	L	370.85	-1.1	L	409.77	-0.9	M	787.87	0
ENSOCUG00000021395	EFR3B	M	18.07	-0.2	H	77.47	1.9	H	91.96	2.2	H	70.22	1.8	H	68.77	1.7	H	64.04	1.7	M	22.71	0.1	H	57.6	1.5	H	60.91	1.6	M	20.33	0
ENSOCUG00000021480	FOXS1	M	8.04	-0.4	H	22.53	1.1	H	26.6	1.4	H	22.28	1.1	H	26.53	1.3	H	51.1	2.3	M	14.02	0.4	H	22.29	1.1	H	27.96	1.4	M	10.53	0
ENSOCUG00000021524	ALKBH2	M	51.46	-0.4	L	30.54	-1.2	M	48.65	-0.5	M	47.87	-0.5	L	32.24	-1.1	M	45.68	-0.6	M	57.11	-0.3	M	43.91	-0.6	M	49.01	-0.5	M	68.82	0
ENSOCUG00000021573	DNASE2	M	7.0	0.2	H	11.87	0.9	H	14.04	1.2	M	9.81	0.6	M	7.35	0.3	M	8.92	0.5	M	6.23	0.1	M	9.79	0.7	M	9.69	0.6	M	6.4	0
ENSOCUG00000021858	RIOX1	M	35.62	0.1	M	50.56	0.6	H	63.73	0.9	M	56.13	0.7	H	69.01	1.0	H	62.87	0.9	M	48.69	0.5	H	59.12	0.8	M	44.8	0.4	M	34.06	0
ENSOCUG00000021938	ENSOCUG00000021938	M	682.42	0.1	M	379.44	-0.7	M	423.93	-0.5	L	286.64	-1.1	L	299.69	-1.0	L	307.34	-1.0	M	524.58	-0.2	L	277.8	-1.2	L	282.13	-1.1	M	620.89	0
ENSOCUG00000022118	PSPH	M	240.9	0.2	M	141.63	-0.6	L	100.89	-1.1	M	140.38	-0.6	M	133.29	-0.7	L	105.55	-1.0	M	158.21	-0.4	L	115.21	-0.9	L	116.06	-0.9	M	211.78	0
ENSOCUG00000022125	IL34	M	18.43	0.3	M	23.84	0.6	H	32.4	1.1	H	33.36	1.1	M	15.37	0.0	H	30.59	1.0	M	19.95	0.4	M	20.33	0.4	M	20.64	0.4	M	15.13	0
ENSOCUG00000022370	PAIP2B	M	159.75	0.1	L	64.78	-1.2	L	62.91	-1.2	L	68.24	-1.1	M	101.76	-0.6	M	103.45	-0.5	H	309.89	1.0	M	105.12	-0.5	M	119.04	-0.3	M	150.13	0
ENSOCUG00000022820	ENSOCUG00000022820	M	20.93	0.3	M	18.19	0.1	M	17.98	0.1	H	44.27	1.4	M	28.81	0.7	M	17.85	0.1	H	31.85	0.9	M	25.39	0.6	H	44.55	1.4	M	16.77	0
ENSOCUG00000022823	ID3	M	96.57	0.4	H	120.7	0.8	H	180.07	1.3	M	104.39	0.6	M	115.28	0.7	M	102.01	0.5	M	91.9	0.3	M	81.17	0.2	M	99.33	0.5	M	71.49	0
ENSOCUG00000022843	ENSOCUG00000022843	M	258.29	-0.2	L	171.35	-0.8	L	139.55	-1.0	M	180.17	-0.7	L	147.92	-1.0	M	203.19	-0.5	M	219.3	-0.4	L	166.1	-0.8	L	165.8	-0.8	M	288.91	0
ENSOCUG00000022883	GDPD3	M	6.29	-0.2	H	12.54	0.8	H	14.77	1.0	M	6.97	-0.0	M	10.64	0.6	H	17.09	1.3	M	11.7	0.7	M	6.63	-0.1	H	12.72	0.8	M	7.3	0
ENSOCUG00000022942	ZXDC	M	862.53	0.1	L	457.42	-0.8	L	440.98	-0.9	M	527.76	-0.6	L	408.52	-1.0	L	422.13	-1.0	M	713.78	-0.2	L	386.53	-1.1	L	440.24	-0.9	M	820.88	0
ENSOCUG00000022945	ASNS	M	5.78	-0.2	H	26.35	1.9	H	25.77	1.9	H	21.52	1.7	H	24.32	1.8	H	18.95	1.5	M	9.03	0.3	H	26.6	2.0	H	14.97	1.1	M	6.96	0
ENSOCUG00000023007	SEC14L5	M	13.13	-0.2	H	35.5	1.3	H	49.23	1.8	H	50.83	1.8	H	47.14	1.7	H	35.03	1.3	M	16.81	0.2	H	42.52	1.5	H	26.73	0.9	M	14.6	0
ENSOCUG00000023112	XYLB	M	66.14	0.0	M	69.59	0.1	M	76.81	0.2	M	104.9	0.7	M	59.39	-0.1	H	131.33	1.0	M	108.84	0.7	M	63.52	-0.1	M	70.93	0.1	M	65.66	0
ENSOCUG00000023173	LIPT1	M	46.08	-0.2	M	32.29	-0.7	L	30.98	-0.8	L	28.53	-0.9	L	27.61	-0.9	L	17.24	-1.7	M	41.1	-0.4	L	26.22	-1.1	L	29.56	-0.9	M	54.42	0
ENSOCUG00000023297	FSD1L	M	67.24	0.1	M	78.24	0.4	H	124.43	1.0	M	77.12	0.3	M	99.58	0.7	M	87.1	0.5	M	53.49	-0.2	M	97.27	0.7	M	94.86	0.6	M	60.83	0
ENSOCUG00000023465	MOB2	M	587.42	0.0	M	352.3	-0.7	L	291.28	-1.0	L	292.99	-1.0	L	289.74	-1.0	M	352.7	-0.7	M	490.87	-0.3	L	280.66	-1.1	L	318.43	-0.9	M	586.03	0
ENSOCUG00000023498	TBX2	M	36.89	-0.2	M	56.22	0.4	H	98.62	1.2	M	56.22	0.4	M	34.84	-0.3	H	78.21	0.9	M	47.33	0.1	M	63.4	0.6	M	68.0	0.7	M	42.59	0
ENSOCUG00000023698	ASB12	M	746.4	0.2	M	1057.88	0.7	M	805.16	0.3	M	853.6	0.4	M	1009.71	0.6	M	967.83	0.5	H	1486.88	1.2	M	1097.63	0.7	M	1036.89	0.6	M	664.66	0
ENSOCUG00000023795	ENSOCUG00000023795	M	52.9	0.1	M	44.23	-0.1	L	28.38	-0.8	M	33.48	-0.5	L	28.47	-0.8	M	30.15	-0.6	M	35.08	-0.4	L	28.19	-0.8	L	23.19	-1.1	M	47.84	0
ENSOCUG00000023933	CKAP2	M	46.32	0.4	M	52.82	0.6	M	43.15	0.3	M	49.65	0.5	H	61.93	0.8	M	43.92	0.3	H	72.12	1.0	M	53.14	0.6	M	49.97	0.5	M	35.91	0
ENSOCUG00000023955	ENSOCUG00000023955	M	7.85	-0.3	M	12.04	0.3	H	19.26	1.0	M	9.21	-0.1	M	14.66	0.6	H	16.42	0.8	H	21.51	1.1	M	16.1	0.7	M	16.13	0.7	M	9.79	0
ENSOCUG00000023987	ENSOCUG00000023987	M	106.58	-0.4	M	105.86	-0.4	L	77.57	-0.8	M	109.19	-0.4	L	58.93	-1.2	L	57.61	-1.3	M	83.63	-0.7	L	59.48	-1.2	L	58.83	-1.3	M	139.77	0
ENSOCUG00000024221	INMT	M	65.69	0.0	M	73.34	0.2	L	36.76	-0.8	M	53.12	-0.3	M	38.97	-0.7	M	38.61	-0.7	M	62.5	-0.1	M	60.26	-0.1	L	29.07	-1.1	M	64.8	0
ENSOCUG00000024295	TRIB1	M	269.57	-0.1	H	544.19	0.9	M	476.44	0.7	H	621.91	1.1	H	534.66	0.9	M	423.47	0.6	M	253.54	-0.2	M	441.31	0.6	M	386.36	0.4	M	288.94	0
ENSOCUG00000024362	ENSOCUG00000024362	M	32.74	0.2	H	59.78	1.1	H	52.52	0.9	M	38.33	0.4	H	50.09	0.8	M	33.7	0.2	M	31.02	0.1	M	40.61	0.5	H	51.5	0.8	M	28.7	0
ENSOCUG00000024434	ENSOCUG00000024434	M	93.15	-0.1	M	84.4	-0.2	M	87.04	-0.2	M	77.4	-0.3	M	87.91	-0.2	M	77.62	-0.4	L	38.15	-1.4	M	77.82	-0.3	M	68.05	-0.5	M	99.18	0
ENSOCUG00000024640	ENSOCUG00000024640	M	18.86	0.0	M	12.52	-0.5	M	11.05	-0.7	M	11.36	-0.7	M	13.61	-0.4	L	8.99	-1.0	M	11.73	-0.6	M	16.25	-0.2	M	14.71	-0.3	M	18.2	0
ENSOCUG00000024679	FKBP7	M	26.85	-0.2	H	53.43	0.8	H	67.19	1.1	M	51.68	0.7	M	43.52	0.5	M	42.17	0.4	M	43.18	0.4	H	59.15	0.9	H	55.79	0.8	M	31.69	0
ENSOCUG00000024688	DNMT3A	M	640.96	0.1	H	1179.02	1.0	H	1052.96	0.9	H	1252.46	1.1	H	1059.87	0.9	M	927.08	0.7	M	625.39	0.1	H	1132.25	1.0	H	1005.53	0.8	M	580.67	0
ENSOCUG00000024739	ZBED6	M	40.5	-0.1	H	112.54	1.4	H	96.34	1.2	H	95.57	1.2	H	127.44	1.6	M	44.38	0.1	H	126.3	1.6	H	138.78	1.7	H	145.59	1.8	M	42.22	0
ENSOCUG00000024766	NGRN	M	1900.54	0.1	M	1273.24	-0.5	M	1091.13	-0.7	M	1168.91	-0.6	M	1102.9	-0.7	M	1390.41	-0.4	L	889.6	-1.0	M	1080.71	-0.7	M	1289.97	-0.5	M	1805.2	0
ENSOCUG00000024814	CHRNA1	M	46.87	-0.4	M	80.83	0.4	H	102.72	0.8	M	79.64	0.4	H	126.46	1.1	H	142.02	1.2	M	82.36	0.4	H	118.5	1.0	H	110.49	0.9	M	60.8	0
ENSOCUG00000024817	CYB5RL	M	38.82	0.3	M	23.03	-0.5	M	23.34	-0.5	M	34.79	0.1	M	20.91	-0.6	M	19.75	-0.7	L	12.08	-1.4	L	13.53	-1.3	M	24.12	-0.4	M	32.36	0
ENSOCUG00000024967	ID1	M	96.64	0.1	M	93.53	0.0	H	208.13	1.2	M	103.94	0.2	H	158.77	0.8	M	115.36	0.4	M	96.57	0.1	M	83.72	-0.1	M	100.15	0.1	M	90.39	0
ENSOCUG00000025113	MYCL	M	81.93	0.3	M	99.11	0.5	H	170.6	1.3	H	312.93	2.2	H	138.49	1.0	M	92.87	0.5	M	44.32	-0.6	M	102.74	0.6	M	70.33	0.1	M	67.58	0
ENSOCUG00000025190	LRRC58	M	25.28	-0.1	M	23.82	-0.2	M	31.83	0.3	M	29.59	0.2	M	31.74	0.2	M	28.32	0.1	H	56.91	1.1	M	35.05	0.4	M	33.03	0.3	M	26.07	0
ENSOCUG00000025214	ENSOCUG00000025214	M	40.83	0.4	M	42.04	0.5	H	55.41	0.9	H	66.91	1.2	H	52.45	0.8	H	59.23	1.0	M	38.22	0.3	M	39.29	0.4	M	41.78	0.5	M	29.64	0
ENSOCUG00000025228	ENSOCUG00000025228	M	135.24	-0.2	M	131.76	-0.2	M	113.04	-0.4	L	47.56	-1.7	M	132.25	-0.2	M	111.44	-0.5	M	104.19	-0.6	M	123.13	-0.3	L	60.21	-1.4	M	155.36	0
ENSOCUG00000025278	ARHGAP32	M	116.61	0.1	M	109.94	0.0	M	167.97	0.6	M	159.22	0.6	H	248.87	1.2	M	137.63	0.4	M	102.82	-0.1	H	188.58	0.8	M	161.92	0.6	M	106.94	0
ENSOCUG00000025317	PTP4A3	M	7181.17	0.2	M	4906.71	-0.3	M	4319.38	-0.5	M	4701.13	-0.4	M	4005.98	-0.6	M	6204.3	-0.0	L	3022.25	-1.0	M	5756.32	-0.1	M	3800.49	-0.7	M	6236.25	0
ENSOCUG00000025508	RELL2	M	5.52	0.1	H	9.27	0.9	H	14.85	1.5	M	8.78	0.7	M	6.54	0.4	H	12.77	1.3	H	12.68	1.2	H	9.02	0.8	H	13.74	1.4	M	5.23	0
ENSOCUG00000025559	ENSOCUG00000025559	M	11.96	0.2	M	17.14	0.7	H	18.82	0.9	M	15.58	0.6	M	13.3	0.3	H	25.36	1.3	M	9.43	-0.2	M	14.36	0.4	M	14.37	0.5	M	10.21	0
ENSOCUG00000025588	ATPSCKMT	M	38.68	-0.3	M	32.99	-0.5	M	33.28	-0.5	M	33.42	-0.4	M	37.38	-0.3	M	39.31	-0.2	L	18.18	-1.3	M	35.22	-0.4	M	35.27	-0.4	M	46.58	0
ENSOCUG00000025595	RHBDD3	M	399.62	0.2	M	271.55	-0.4	M	240.48	-0.6	M	289.16	-0.3	L	152.14	-1.2	L	199.53	-0.8	M	300.42	-0.2	M	245.52	-0.5	M	236.68	-0.6	M	355.7	0
ENSOCUG00000025609	MAP10	M	44.66	-0.3	M	35.76	-0.6	L	31.36	-0.8	L	23.55	-1.2	M	39.21	-0.5	L	25.57	-1.1	M	42.52	-0.3	M	36.19	-0.6	M	42.85	-0.3	M	54.57	0
ENSOCUG00000025995	ASB2	M	7193.59	-0.1	L	4584.98	-0.8	L	3365.34	-1.2	L	4408.12	-0.8	L	3540.02	-1.2	L	4036.09	-1.0	M	6878.24	-0.2	L	4147.19	-0.9	L	4222.9	-0.9	M	7930.73	0
ENSOCUG00000026111	ENSOCUG00000026111	M	3722.81	0.2	L	1668.87	-1.0	L	1810.46	-0.9	M	2669.26	-0.3	L	1555.99	-1.1	M	2464.24	-0.4	M	4182.26	0.4	L	1103.55	-1.6	L	1711.22	-0.9	M	3266.36	0
ENSOCUG00000026120	FOLH1	M	56.41	-0.2	M	67.91	0.0	M	106.54	0.7	M	69.15	0.1	H	140.48	1.1	H	127.28	0.9	H	152.33	1.2	M	67.38	0.0	M	66.08	0.0	M	66.2	0
ENSOCUG00000026192	RHOF	M	45.43	-0.4	M	39.49	-0.6	L	34.57	-0.8	L	28.19	-1.1	L	34.79	-0.8	M	55.99	-0.1	M	56.33	-0.1	M	40.84	-0.6	M	47.01	-0.4	M	60.8	0
ENSOCUG00000026280	ENSOCUG00000026280	M	233.83	0.4	M	227.67	0.4	H	380.79	1.1	H	427.5	1.3	H	321.62	0.9	H	406.07	1.2	M	272.17	0.6	M	289.79	0.7	M	242.58	0.4	M	178.02	0
ENSOCUG00000026383	AKR1B10	M	858.86	-0.4	H	2335.81	1.0	H	2211.21	0.9	M	1329.51	0.2	H	2528.37	1.1	M	1547.82	0.4	M	1448.4	0.3	M	1879.53	0.7	H	2093.97	0.8	M	1172.12	0
ENSOCUG00000026443	UNC45B	M	3396.59	-0.1	M	2645.99	-0.4	M	2317.85	-0.6	M	2735.45	-0.4	L	1660.22	-1.1	L	1836.23	-0.9	M	2386.86	-0.6	M	2319.72	-0.6	M	2435.26	-0.5	M	3539.58	0
ENSOCUG00000026686	FSD2	M	1631.76	0.4	H	2266.47	0.9	H	2172.84	0.9	H	2103.42	0.8	H	2741.74	1.2	H	2057.95	0.8	M	1633.53	0.4	H	2565.31	1.1	H	2739.42	1.2	M	1202.07	0
ENSOCUG00000026770	FJX1	M	10.48	-0.1	M	16.37	0.5	H	32.15	1.5	H	22.23	0.9	M	18.16	0.7	M	16.75	0.6	M	13.21	0.2	H	27.41	1.3	M	17.18	0.6	M	11.17	0
ENSOCUG00000026898	AKR1C26	M	95.5	-0.1	L	57.76	-0.8	M	62.37	-0.7	M	61.59	-0.7	L	49.24	-1.0	M	75.9	-0.4	L	45.77	-1.1	M	62.52	-0.7	L	50.39	-1.0	M	99.09	0
ENSOCUG00000026967	C1orf198	M	47.17	0.1	M	64.42	0.5	H	94.96	1.1	H	91.17	1.0	M	75.63	0.7	H	82.77	0.9	M	57.96	0.3	M	65.61	0.5	H	88.01	1.0	M	45.22	0
ENSOCUG00000026982	ENSOCUG00000026982	M	411.01	0.3	M	310.92	-0.1	H	583.94	0.8	M	475.32	0.5	M	464.13	0.5	H	775.96	1.2	M	448.19	0.4	M	380.29	0.2	M	449.03	0.4	M	330.47	0
ENSOCUG00000027213	ENSOCUG00000027213	M	187.64	0.4	M	219.21	0.6	H	298.97	1.0	M	226.09	0.6	H	251.12	0.8	H	248.72	0.8	M	164.58	0.2	H	257.57	0.8	H	275.03	0.9	M	146.39	0
ENSOCUG00000027255	GEN1	M	18.88	0.0	M	22.39	0.3	M	22.99	0.3	M	16.01	-0.2	H	41.35	1.1	M	18.16	-0.0	M	11.88	-0.6	M	28.77	0.6	M	27.8	0.6	M	18.33	0
ENSOCUG00000027275	TM4SF1	M	79.71	0.1	M	115.84	0.6	H	164.9	1.2	M	110.77	0.6	M	109.39	0.6	M	115.19	0.6	M	85.21	0.2	H	135.95	0.9	M	108.45	0.6	M	74.13	0
ENSOCUG00000027672	PPFIA4	M	116.66	-0.0	M	192.02	0.7	H	242.16	1.0	M	132.18	0.1	M	151.12	0.3	H	269.66	1.2	M	166.34	0.5	M	146.43	0.3	M	155.26	0.4	M	119.15	0
ENSOCUG00000027865	CYP11A1	M	100.5	0.1	M	93.22	-0.0	M	70.61	-0.4	M	61.33	-0.6	L	45.21	-1.1	M	112.0	0.2	M	76.57	-0.3	M	65.92	-0.5	L	48.0	-1.0	M	95.73	0
ENSOCUG00000027942	ZDHHC4	M	292.87	-0.2	M	214.54	-0.6	M	221.63	-0.6	M	225.77	-0.5	L	153.1	-1.1	M	271.01	-0.3	M	213.4	-0.6	L	163.1	-1.0	L	158.64	-1.0	M	327.83	0
ENSOCUG00000027971	SYT11	M	6.01	-0.3	M	9.81	0.5	H	14.09	1.1	M	8.39	0.2	M	6.98	-0.0	M	9.14	0.4	M	11.09	0.6	M	9.76	0.5	H	12.02	0.8	M	7.07	0
ENSOCUG00000027985	TNFRSF12A	M	123.34	-0.2	H	362.7	1.3	H	653.86	2.2	H	817.02	2.5	H	664.27	2.2	H	985.02	2.8	M	192.11	0.4	H	606.8	2.1	H	404.05	1.5	M	144.36	0
ENSOCUG00000029127	CD164	M	427.55	0.4	H	682.07	1.1	H	544.4	0.8	H	597.95	0.9	H	606.01	0.9	H	573.26	0.8	M	421.4	0.4	H	556.16	0.8	H	706.51	1.1	M	320.78	0
ENSOCUG00000029159	ENSOCUG00000029159	M	34.43	0.0	L	18.52	-0.9	L	18.22	-0.9	M	19.87	-0.7	L	18.91	-0.8	L	16.03	-1.1	M	30.08	-0.2	M	23.51	-0.5	M	22.96	-0.6	M	33.75	0
ENSOCUG00000029166	PPDPFL	M	223.57	-0.4	L	161.6	-0.9	L	113.06	-1.4	L	149.59	-1.0	M	247.42	-0.2	M	194.08	-0.6	M	210.71	-0.5	M	295.26	0.0	M	239.73	-0.3	M	292.6	0
ENSOCUG00000029170	ZNF540	M	5.73	0.2	M	5.63	0.2	M	5.06	0.1	M	5.05	0.1	M	6.79	0.5	H	11.17	1.2	M	8.03	0.7	M	7.98	0.7	H	8.15	0.8	M	4.98	0
ENSOCUG00000029203	ZFP37	M	11.28	0.1	L	6.24	-0.8	M	9.02	-0.3	M	8.18	-0.4	M	9.55	-0.1	L	5.71	-0.9	M	8.08	-0.4	L	4.43	-1.3	M	7.01	-0.7	M	10.5	0
ENSOCUG00000029206	ENSOCUG00000029206	M	11.83	-0.1	M	16.17	0.3	M	20.79	0.7	H	21.67	0.8	H	26.5	1.0	M	17.24	0.4	H	23.07	0.9	H	26.0	1.0	H	22.31	0.8	M	12.84	0
ENSOCUG00000029364	IP6K3	M	312.14	-0.3	M	603.25	0.7	H	635.45	0.8	H	767.75	1.0	H	740.57	1.0	H	629.84	0.8	M	497.05	0.4	H	636.76	0.8	M	465.45	0.3	M	374.03	0
ENSOCUG00000029435	LCOR	M	21.66	-0.1	M	25.62	0.2	H	39.39	0.8	H	40.07	0.8	H	49.5	1.1	M	27.36	0.3	M	34.52	0.6	H	41.22	0.8	M	38.26	0.7	M	22.89	0
ENSOCUG00000029438	ENSOCUG00000029438	M	73.81	-0.3	L	50.79	-0.8	M	60.1	-0.6	L	29.91	-1.6	L	41.24	-1.1	M	87.08	-0.0	M	86.36	-0.1	L	30.35	-1.6	L	46.96	-1.0	M	90.69	0
ENSOCUG00000029473	ENSOCUG00000029473	M	33.75	-0.4	M	33.98	-0.3	M	29.46	-0.5	M	28.16	-0.6	M	30.69	-0.5	L	18.77	-1.2	M	40.96	-0.1	M	40.07	-0.1	M	35.06	-0.3	M	43.77	0
ENSOCUG00000029543	ENSOCUG00000029543	M	35.1	0.4	M	37.82	0.5	H	43.41	0.8	M	34.13	0.4	M	42.18	0.7	M	40.52	0.6	H	51.83	1.0	H	51.15	1.0	M	43.1	0.7	M	25.54	0
ENSOCUG00000029733	ENSOCUG00000029733	M	15.59	-0.0	M	22.83	0.6	M	24.57	0.7	M	24.37	0.7	H	26.96	0.8	M	21.0	0.4	M	24.75	0.7	H	33.14	1.1	M	26.0	0.7	M	15.72	0
ENSOCUG00000029757	ENSOCUG00000029757	M	15.16	0.1	H	31.17	1.1	M	22.62	0.6	M	14.53	0.1	H	31.63	1.1	M	22.86	0.7	M	16.34	0.2	H	28.97	1.0	H	26.73	0.9	M	14.37	0
ENSOCUG00000029758	ENSOCUG00000029758	M	7.36	0.3	M	9.74	0.7	M	7.04	0.3	M	5.75	-0.0	M	9.35	0.7	M	7.08	0.3	H	10.03	0.8	H	12.84	1.2	M	7.85	0.5	M	6.21	0
ENSOCUG00000029759	ZNF8	M	10.94	-0.0	H	18.46	0.8	H	19.67	0.9	H	22.88	1.1	H	23.02	1.0	M	14.41	0.4	M	14.95	0.5	H	19.19	0.8	H	19.84	0.8	M	10.85	0
ENSOCUG00000030198	WDR5B	M	20.97	-0.3	M	19.06	-0.4	L	11.27	-1.2	L	13.65	-0.9	M	18.12	-0.5	L	14.14	-0.9	L	13.47	-0.9	M	16.31	-0.7	L	14.85	-0.8	M	25.92	0
ENSOCUG00000030446	ENSOCUG00000030446	M	13.3	-0.4	M	11.02	-0.6	L	6.78	-1.3	M	11.37	-0.6	M	11.6	-0.6	L	9.41	-0.9	L	10.13	-0.8	L	7.33	-1.2	M	13.34	-0.4	M	17.3	0
ENSOCUG00000030645	ZNF250	M	73.83	-0.0	M	62.69	-0.3	M	55.42	-0.5	M	57.1	-0.4	M	55.04	-0.5	M	57.47	-0.4	H	170.38	1.2	M	62.66	-0.3	M	67.27	-0.2	M	75.75	0
ENSOCUG00000030959	IDI2	M	25.04	-0.4	M	23.16	-0.5	M	50.97	0.7	M	42.79	0.4	M	31.19	-0.1	H	58.7	0.9	L	0.0	-7.4	L	0.18	-6.8	M	30.27	-0.1	M	32.27	0
ENSOCUG00000031603	ENSOCUG00000031603	M	68.23	0.2	H	272.86	2.2	H	269.95	2.2	M	88.42	0.6	H	332.19	2.5	M	59.98	0.1	M	69.65	0.3	H	294.92	2.3	M	90.79	0.6	M	58.34	0
ENSOCUG00000033016	ENSOCUG00000033016	M	21.61	-0.1	M	18.35	-0.3	M	15.97	-0.5	M	26.17	0.2	M	16.26	-0.4	M	15.27	-0.5	M	24.09	0.1	L	10.28	-1.1	M	19.55	-0.2	M	22.76	0
ENSOCUG00000033345	ENSOCUG00000033345	M	41.2	-0.2	M	81.32	0.7	H	116.67	1.3	M	73.17	0.6	M	63.69	0.4	H	110.54	1.2	M	57.33	0.2	M	66.75	0.5	M	71.55	0.6	M	48.77	0
ENSOCUG00000033525	ENSOCUG00000033525	M	7.32	-0.1	M	7.01	-0.1	L	4.41	-0.8	M	5.48	-0.5	L	4.38	-0.9	L	4.27	-0.9	L	2.04	-1.9	M	5.49	-0.5	M	4.8	-0.7	M	7.73	0
ENSOCUG00000034282	ENSOCUG00000034282	M	22.03	0.4	M	20.13	0.3	H	29.53	0.8	M	24.91	0.6	H	41.22	1.3	M	26.83	0.7	M	27.1	0.7	H	38.77	1.2	H	45.37	1.4	M	16.49	0
ENSOCUG00000034289	ENSOCUG00000034289	M	47.29	-0.0	M	39.18	-0.3	L	22.88	-1.1	M	34.66	-0.5	L	18.49	-1.4	L	22.41	-1.1	M	36.95	-0.4	L	14.06	-1.8	L	26.45	-0.9	M	48.74	0
ENSOCUG00000034299	ENSOCUG00000034299	M	423.22	0.1	L	230.58	-0.8	M	256.66	-0.6	M	250.04	-0.6	L	217.09	-0.8	M	242.2	-0.7	M	347.92	-0.2	L	177.53	-1.1	L	197.23	-1.0	M	389.09	0
ENSOCUG00000034782	OAS1	M	56.59	0.1	M	71.96	0.5	L	24.18	-1.1	L	27.46	-1.0	L	21.44	-1.3	M	49.19	-0.1	M	41.76	-0.3	M	33.44	-0.6	M	31.56	-0.7	M	52.05	0
ENSOCUG00000035399	ENSOCUG00000035399	M	18.48	0.3	M	16.34	0.1	H	32.05	1.1	M	20.83	0.5	M	14.2	-0.1	M	25.17	0.7	M	21.84	0.5	M	17.09	0.2	M	20.11	0.5	M	14.82	0
ENSOCUG00000035534	E2F6	M	1326.9	0.3	M	657.18	-0.7	L	570.26	-0.9	L	636.19	-0.8	L	528.84	-1.1	L	630.26	-0.8	M	948.37	-0.2	L	556.6	-1.0	M	661.54	-0.7	M	1102.01	0
ENSOCUG00000036167	ENSOCUG00000036167	M	13.91	-0.2	M	9.92	-0.7	M	11.85	-0.4	L	8.13	-1.0	L	9.04	-0.8	M	10.23	-0.7	M	10.2	-0.7	M	13.45	-0.2	L	5.97	-1.5	M	15.9	0
ENSOCUG00000036297	ENSOCUG00000036297	M	35.21	-0.4	M	33.15	-0.5	M	27.69	-0.7	L	13.98	-1.7	L	27.65	-0.8	L	26.19	-0.8	M	43.11	-0.1	L	23.98	-0.9	M	32.51	-0.5	M	46.72	0
ENSOCUG00000036648	ENSOCUG00000036648	M	22.86	-0.0	M	23.42	0.0	M	18.13	-0.3	M	21.89	-0.1	M	22.89	-0.0	M	20.03	-0.2	H	47.09	1.0	M	20.83	-0.1	M	22.39	-0.0	M	22.37	0
ENSOCUG00000037192	ENSOCUG00000037192	M	5.41	-0.2	M	9.07	0.5	H	14.24	1.2	M	8.72	0.5	M	8.86	0.4	M	6.89	0.0	M	10.46	0.7	M	10.69	0.7	M	6.12	-0.0	M	6.33	0
ENSOCUG00000037527	ZNF382	M	86.94	0.3	M	114.63	0.7	M	113.85	0.7	M	109.46	0.6	H	127.08	0.8	M	95.52	0.4	H	144.55	1.0	H	129.05	0.8	H	122.33	0.8	M	72.18	0
ENSOCUG00000037867	ENSOCUG00000037867	M	433.43	-0.4	M	382.07	-0.6	M	616.6	0.1	L	282.27	-1.1	L	205.74	-1.5	L	342.33	-0.8	M	727.42	0.3	L	251.22	-1.2	L	329.26	-0.8	M	587.02	0
ENSOCUG00000038129	STX8	M	55.62	-0.3	M	69.88	-0.0	L	31.56	-1.2	M	44.27	-0.7	L	25.34	-1.4	M	51.21	-0.4	L	29.94	-1.2	L	31.33	-1.2	M	55.5	-0.3	M	70.84	0
ENSOCUG00000038891	CDCA5	M	79.37	0.4	M	45.45	-0.3	L	28.68	-1.0	M	53.37	-0.1	M	36.46	-0.7	M	61.09	0.1	M	39.05	-0.6	M	39.12	-0.6	L	32.85	-0.8	M	58.2	0
ENSOCUG00000039229	ENSOCUG00000039229	M	115.58	0.3	M	70.95	-0.4	M	75.79	-0.3	M	75.76	-0.3	L	55.67	-0.8	M	59.04	-0.7	M	57.98	-0.7	L	41.77	-1.2	L	46.65	-1.0	M	94.35	0
