# Supplementary material for: Family-based Analysis of Allele-Specific Expression Reveals Mostly Simple, Intermediate-type of Inheritance
Source: Research Square preprint supplement (doi:10.21203/rs.3.rs-6515696/v1), 2025-06-05
Supplement: Supplementary file 4 [file 524b436dad4dc35d5a63e23d.xlsx]

## Sheet: WGS_samtools-flagstat-dp
Sample	Total Reads(M)	Total Passed QC(M)	Mapped(M)	%mapped	Supplementary Alignments(M)	Paired in Sequencing(M)	Properly Paired(M)	Reads with itself and mate mapped(M)	Singletons	Mate mapped to different chromosome(M)	Mate mapped to different chromosome (mapQ >= 5)
mother	558.933	558.933	555.667	99.4157	8.82246	550.111	521.718	545.853	0.992386	19.1513	9.35174
child_1	761.665	761.665	757.211	99.4153	12.2293	749.436	710.583	743.661	1.3213	26.5909	13.3173
child_2	649.373	649.373	645.607	99.42	10.299	639.074	605.565	634.096	1.21176	22.5992	10.9829
child_3	703.43	703.43	699.478	99.4381	10.8813	692.549	656.604	687.389	1.20721	24.349	11.88
child_4	707.804	707.804	703.34	99.3693	11.3807	696.423	659.353	690.604	1.35449	24.7647	11.8995
child_5	651.381	651.381	647.678	99.4314	10.5542	640.827	607.159	635.943	1.18068	22.7229	10.819
child_6	1107.08	1107.08	1099.85	99.3463	17.6941	1089.39	1031.6	1080.03	2.12455	38.4776	18.4954
child_7	546.574	546.574	543.244	99.3909	8.61747	537.956	471.346	533.707	0.919695	18.8521	8.45703
child_8	692.636	692.636	688.301	99.3741	11.27	681.366	643.174	675.642	1.38852	25.7863	12.7447
father	665.888	665.888	653.803	98.1851	10.7862	655.102	612.13	641.779	1.23804	23.483	11.3865

## Sheet: WGS_counts_dup
Sample	Unique Reads	Duplicate Reads	% duplicated reads
mother_WGS_1	219155612	55899814	25.5069
mother_WGS_2	221014444	54040982	24.4513
child_1_WGS_1	283283889	91433958	32.2764
child_1_WGS_2	286976438	87741409	30.5744
child_2_WGS_1	244358002	75179217	30.766
child_2_WGS_2	247843107	71694112	28.9272
child_3_WGS_1	265659488	80614937	30.3452
child_3_WGS_2	268530782	77743643	28.9515
child_4_WGS_1	262391915	85819605	32.7066
child_4_WGS_2	265700589	82510931	31.0541
child_5_WGS_1	246960891	73452758	29.7427
child_5_WGS_2	249361419	71052230	28.4937
child_6_WGS_1	389915527	154779412	39.6956
child_6_WGS_2	395310745	149384194	37.7891
child_7_WGS_1	222286045	46692068	21.0054
child_7_WGS_2	224168488	44809625	19.9893
child_8_WGS_1	261706415	78976670	30.1776
child_8_WGS_2	265149187	75533898	28.4873
father_WGS_1	227177492	100373520	44.1829
father_WGS_2	228637016	98913996	43.2625

## Sheet: RNA_star_alignment
Category	Number of input reads	Uniquly Mapped	Mapped %	Mapped to too many loci	Unmapped: too short	Unmapped: other	Duplication_rate
mother_1	19190548	16495132	85.9545	1156043	1518259	21114	0.146357
mother_2	19423162	16989586	87.4708	1027015	1383248	23313	0.117831
mother_3	18149585	15880691	87.4989	1017956	1229151	21787	0.138375
mother_4	21043708	18409379	87.4816	1087564	1521512	25253	0.145757
child_1_1	20791785	18028678	86.7106	1034475	1707830	20802	0.139262
child_1_2	21986480	19151904	87.1076	1275997	1536596	21983	0.167627
child_1_3	19442156	16881585	86.8298	1091727	1443586	25258	0.147575
child_1_4	22847042	19999020	87.5344	1204653	1622798	20571	0.164227
child_2_1	25744723	22491558	87.3638	1200736	2029281	23148	0.156707
child_2_2	25163881	21698258	86.2278	1401227	2036737	27659	0.149304
child_2_3	16291984	14263673	87.5503	890798	1122846	14667	0.14205
child_2_4	21627198	18946382	87.6044	952095	1702790	25931	0.108353
child_3_1	26120911	22711902	86.9491	1214732	2173379	20898	0.158788
child_3_2	18540339	16115918	86.9235	1054444	1353293	16684	0.142487
child_3_3	19984830	17136158	85.7458	1129820	1694868	23984	0.171802
child_3_4	22661054	19995482	88.2372	1092539	1557167	15866	0.155916
child_4_1	30366932	26282100	86.5484	1347163	2710323	27346	0.159823
child_4_2	18905785	16567643	87.6327	1033849	1287280	17013	0.144524
child_4_3	20233913	17754985	87.7486	1071513	1387164	20251	0.154389
child_4_4	26946246	23800895	88.3273	1382441	1741345	21565	0.165384
child_5_1	28728083	23544669	81.957	1585141	3555163	43110	0.18012
child_5_2	19414330	16879473	86.9434	1043689	1469810	21358	0.133971
child_5_3	19564376	17285086	88.3498	985706	1272057	21527	0.136031
child_5_4	20793773	17997160	86.5507	1073381	1702445	20787	0.137911
child_6_1	26342115	23056928	87.5288	1249994	2000966	34227	0.159954
child_6_2	14264697	12416674	87.0448	818843	1009196	19984	0.135152
child_6_3	22959467	20346411	88.6188	1293793	1289436	29827	0.181987
child_6_4	20573384	17663591	85.8565	1058339	1818539	32915	0.138749
child_7_1	27753111	24013794	86.5265	1269924	2441647	27746	0.159736
child_7_2	17775989	15483849	87.1054	977630	1298523	15987	0.14852
child_7_3	21071041	18576832	88.1629	1080585	1396770	16854	0.17218
child_7_4	23038635	19475769	84.5353	1111660	2432776	18430	0.160997
child_8_1	27789812	24397916	87.7945	1338088	2026016	27792	0.165088
child_8_2	18509243	16168831	87.3554	1007595	1310603	22214	0.148081
child_8_3	22005391	19125185	86.9114	1135202	1722999	22005	0.169718
child_8_4	24245436	20929978	86.3254	1236423	2054804	24231	0.164248
father_1	23375604	20652540	88.3508	977322	1722372	23370	0.142802
father_2	18162016	15874750	87.4063	948045	1319233	19988	0.14273
father_3	25533448	21818576	85.451	1276787	2407417	30668	0.176983
father_4	19289469	16528244	85.6853	973318	1768620	19287	0.145773
