# Supplementary material for: Family-based Analysis of Allele-Specific Expression Reveals Mostly Simple, Intermediate-type of Inheritance
Source: Research Square preprint supplement (doi:10.21203/rs.3.rs-6515696/v1), 2025-06-05
Supplement: Supplementary file 5 [file 7821c96481e61b2caea70d57.xlsx]

## Sheet: Up_Regulated
Ensembl id	Symbol	Chr	Description
ENSOCUG00000000025	SLCO2A1	14	solute carrier organic anion transporter family member 2A1
ENSOCUG00000000028	ZNF503	18	zinc finger protein 503
ENSOCUG00000000098	SLC16A10	12	solute carrier family 16 member 10
ENSOCUG00000000148	CDO1	3	cysteine dioxygenase type 1
ENSOCUG00000000236	RGMA		repulsive guidance molecule BMP co-receptor a
ENSOCUG00000000250		16
ENSOCUG00000000258	PDGFRA		platelet derived growth factor receptor alpha
ENSOCUG00000000302		1
ENSOCUG00000000355	CNTFR	1	ciliary neurotrophic factor receptor
ENSOCUG00000000374	ADAMTS15	1	ADAM metallopeptidase with thrombospondin type 1 motif 15
ENSOCUG00000000409		14
ENSOCUG00000000485	NAF1		nuclear assembly factor 1 ribonucleoprotein
ENSOCUG00000000535	ADTRP	12	androgen dependent TFPI regulating protein
ENSOCUG00000000557	NLRC5	5	NLR family CARD domain containing 5
ENSOCUG00000000611	FKBP10	19	FKBP prolyl isomerase 10
ENSOCUG00000000651	LDLR		low density lipoprotein receptor
ENSOCUG00000000696	SMTNL2	19	smoothelin like 2
ENSOCUG00000000716	EPSTI1	8	epithelial stromal interaction 1
ENSOCUG00000000725	MC5R	9	melanocortin 5 receptor
ENSOCUG00000000974
ENSOCUG00000001028	MFSD2A	13	major facilitator superfamily domain containing 2A
ENSOCUG00000001131	CEMIP2	1	cell migration inducing hyaluronidase 2
ENSOCUG00000001145	GRIP2	9	glutamate receptor interacting protein 2
ENSOCUG00000001211		14
ENSOCUG00000001239
ENSOCUG00000001333		7
ENSOCUG00000001342	ANKFN1	19	ankyrin repeat and fibronectin type III domain containing 1
ENSOCUG00000001412	IGFBP6	4	insulin like growth factor binding protein 6
ENSOCUG00000001428	PDE4A		phosphodiesterase 4A
ENSOCUG00000001519	RTN4RL1	19	reticulon 4 receptor like 1
ENSOCUG00000001575	SLC9A3R1		SLC9A3 regulator 1
ENSOCUG00000001676	EZH2	7	enhancer of zeste 2 polycomb repressive complex 2 subunit
ENSOCUG00000001864	AQP8	6	aquaporin 8
ENSOCUG00000001897	HEXD		hexosaminidase D
ENSOCUG00000001949	MRPL15	3	mitochondrial ribosomal protein L15
ENSOCUG00000001963	TNS1	7	tensin 1
ENSOCUG00000002009	NCF2		neutrophil cytosolic factor 2
ENSOCUG00000002065	TCAF1	7	TRPM8 channel associated factor 1
ENSOCUG00000002072		7
ENSOCUG00000002075		9
ENSOCUG00000002131	PSMB8	12	proteasome 20S subunit beta 8
ENSOCUG00000002135	TAP1	12	transporter 1, ATP binding cassette subfamily B member
ENSOCUG00000002139		12
ENSOCUG00000002339	IRF7		interferon regulatory factor 7
ENSOCUG00000002407	MFAP5	8	microfibril associated protein 5
ENSOCUG00000002425	RYR2	16	Oryctolagus cuniculus ryanodine receptor 2 (RYR2), mRNA.
ENSOCUG00000002489	TAP2	12	transporter 2, ATP binding cassette subfamily B member
ENSOCUG00000002553	EMILIN2	9	elastin microfibril interfacer 2
ENSOCUG00000002662		3
ENSOCUG00000002672	ADAMTSL3		ADAMTS like 3
ENSOCUG00000002754	ABCC3	19	ATP binding cassette subfamily C member 3
ENSOCUG00000002836	PCK2	17	phosphoenolpyruvate carboxykinase 2, mitochondrial
ENSOCUG00000002886	ZNF329		zinc finger protein 329
ENSOCUG00000002937	ANKDD1B		ankyrin repeat and death domain containing 1B
ENSOCUG00000003208	DOCK8	1	dedicator of cytokinesis 8
ENSOCUG00000003240	IRX5	5	iroquois homeobox 5
ENSOCUG00000003266	SIN3A		SIN3 transcription regulator family member A
ENSOCUG00000003344	IDO1		indoleamine 2,3-dioxygenase 1
ENSOCUG00000003426	WSCD1	19	WSC domain containing 1
ENSOCUG00000003473	VIPR2	13	vasoactive intestinal peptide receptor 2
ENSOCUG00000003510	OCA2	17	OCA2 melanosomal transmembrane protein
ENSOCUG00000003637	CGNL1	17	cingulin like 1
ENSOCUG00000003764		13
ENSOCUG00000003832	SHB	1	SH2 domain containing adaptor protein B
ENSOCUG00000003897		2	primase and DNA directed polymerase
ENSOCUG00000003942		8
ENSOCUG00000004023	G0S2	16	G0/G1 switch 2
ENSOCUG00000004042	PTPRF	13	protein tyrosine phosphatase receptor type F
ENSOCUG00000004165		3	Oryctolagus cuniculus interferon regulatory factor 1 (IRF1), mRNA.
ENSOCUG00000004266	FAM222A		family with sequence similarity 222 member A
ENSOCUG00000004278	ROBO2	14	roundabout guidance receptor 2
ENSOCUG00000004282
ENSOCUG00000004501
ENSOCUG00000004534	MDN1	12	midasin AAA ATPase 1
ENSOCUG00000004580	POLA2		DNA polymerase alpha 2, accessory subunit
ENSOCUG00000004582	DMRT3	1	doublesex and mab-3 related transcription factor 3
ENSOCUG00000004620	ITIH2	16	inter-alpha-trypsin inhibitor heavy chain 2
ENSOCUG00000004633	PTGER3	13	Oryctolagus cuniculus prostaglandin E receptor 3 (PTGER3), transcript variant 2, mRNA.
ENSOCUG00000004655
ENSOCUG00000004834	F3	13	Oryctolagus cuniculus coagulation factor III, tissue factor (F3), mRNA.
ENSOCUG00000004855	XYLT1	6	xylosyltransferase 1
ENSOCUG00000005091	SERPINB9		serpin family B member 9
ENSOCUG00000005116	PIK3R1	11	phosphoinositide-3-kinase regulatory subunit 1
ENSOCUG00000005174	DPT	13	dermatopontin
ENSOCUG00000005175	QSOX1	13	quiescin sulfhydryl oxidase 1
ENSOCUG00000005286	CACNA2D2	9	calcium voltage-gated channel auxiliary subunit alpha2delta 2
ENSOCUG00000005288	UBE2J1	12	ubiquitin conjugating enzyme E2 J1
ENSOCUG00000005293	DYNC2LI1	2	dynein cytoplasmic 2 light intermediate chain 1
ENSOCUG00000005302	CIDEC		cell death inducing DFFA like effector c
ENSOCUG00000005330	ACADSB		acyl-CoA dehydrogenase short/branched chain
ENSOCUG00000005336	ABI3BP	14	ABI family member 3 binding protein
ENSOCUG00000005343	TTC5	17	tetratricopeptide repeat domain 5
ENSOCUG00000005356	GPR158	16	G protein-coupled receptor 158
ENSOCUG00000005371	THBS2		thrombospondin 2
ENSOCUG00000005374	CARD6	11	caspase recruitment domain family member 6
ENSOCUG00000005445		18
ENSOCUG00000005513	FKBP5	12	FKBP prolyl isomerase 5
ENSOCUG00000005540	CAPN6	X	calpain 6
ENSOCUG00000005614	TTC9		tetratricopeptide repeat domain 9
ENSOCUG00000005688	CTF1		cardiotrophin 1
ENSOCUG00000005747	COL16A1		collagen type XVI alpha 1 chain
ENSOCUG00000005900	FBLN2	9	fibulin 2
ENSOCUG00000005930	ZFPM2	3	zinc finger protein, FOG family member 2
ENSOCUG00000006134		17
ENSOCUG00000006145	CHRDL1	X	chordin like 1
ENSOCUG00000006273	ASPHD2		aspartate beta-hydroxylase domain containing 2
ENSOCUG00000006355	DDX60	2	DExD/H-box helicase 60
ENSOCUG00000006382	ZCCHC24		zinc finger CCHC-type containing 24
ENSOCUG00000006482	IFI44	13	interferon induced protein 44
ENSOCUG00000006484	KIF27		kinesin family member 27
ENSOCUG00000006499	MGARP	15	mitochondria localized glutamic acid rich protein
ENSOCUG00000006561		19
ENSOCUG00000006595	UBA7	9	ubiquitin like modifier activating enzyme 7
ENSOCUG00000006633	KIF6	12	kinesin family member 6
ENSOCUG00000006729	GRK3		G protein-coupled receptor kinase 3
ENSOCUG00000006796	CYP2A10		Oryctolagus cuniculus cytochrome P450 2A10 (CYP2A10), mRNA.
ENSOCUG00000006999	C2	12	complement C2
ENSOCUG00000007039		12
ENSOCUG00000007056		12
ENSOCUG00000007355	DSG2	9	desmoglein 2
ENSOCUG00000007365	KCNS3	2	Potassium voltage-gated channel subfamily S member 3
ENSOCUG00000007492	LMOD1	16	leiomodin 1
ENSOCUG00000007615	DBX1	1	developing brain homeobox 1
ENSOCUG00000007680		14
ENSOCUG00000007753	THY1		Thy-1 cell surface antigen
ENSOCUG00000007765	PSAT1	1	phosphoserine aminotransferase 1
ENSOCUG00000007938
ENSOCUG00000008001	SLC38A5	X	solute carrier family 38 member 5
ENSOCUG00000008011	ABCA8	19	ATP binding cassette subfamily A member 8
ENSOCUG00000008056	LDLRAP1	13	low density lipoprotein receptor adaptor protein 1
ENSOCUG00000008164	ABCC2	18	ATP binding cassette subfamily C member 2
ENSOCUG00000008165	MTFR1	3	mitochondrial fission regulator 1
ENSOCUG00000008181
ENSOCUG00000008240	RGS3		regulator of G protein signaling 3
ENSOCUG00000008288	ECM2	1	extracellular matrix protein 2
ENSOCUG00000008416	ZNF398	7	zinc finger protein 398
ENSOCUG00000008561		7
ENSOCUG00000008651	ITM2A	X	integral membrane protein 2A
ENSOCUG00000008656		13
ENSOCUG00000008707	RTL5	X	retrotransposon Gag like 5
ENSOCUG00000008749	TCF7L1	2	transcription factor 7 like 1
ENSOCUG00000008813	ITGBL1	8	integrin subunit beta like 1
ENSOCUG00000008841	GLUL		glutamate-ammonia ligase
ENSOCUG00000008919	NT5E	12	5'-nucleotidase ecto
ENSOCUG00000009058		5
ENSOCUG00000009086	KLB	2	klotho beta
ENSOCUG00000009088		10	Oryctolagus cuniculus STEAP family member 1 (STEAP1), mRNA.
ENSOCUG00000009095	COMTD1	18	catechol-O-methyltransferase domain containing 1
ENSOCUG00000009144	SLC1A5		solute carrier family 1 member 5
ENSOCUG00000009172	IRX2		iroquois homeobox 2
ENSOCUG00000009360	MST1R	9	macrophage stimulating 1 receptor
ENSOCUG00000009379	MIS18A	14	MIS18 kinetochore protein A
ENSOCUG00000009391
ENSOCUG00000009473	PANX1	1	pannexin 1
ENSOCUG00000009505	PLAGL1	12	PLAG1 like zinc finger 1
ENSOCUG00000009547	MYO5B	9	myosin VB
ENSOCUG00000009555	ARHGAP22		Rho GTPase activating protein 22
ENSOCUG00000009574		4
ENSOCUG00000009644	TUBE1	12	tubulin epsilon 1
ENSOCUG00000009659	LYVE1	1	lymphatic vessel endothelial hyaluronan receptor 1
ENSOCUG00000009676		13
ENSOCUG00000009702	FMOD	16	fibromodulin
ENSOCUG00000009707	PRELP	16	proline and arginine rich end leucine rich repeat protein
ENSOCUG00000009958	NPY1R		neuropeptide Y receptor Y1
ENSOCUG00000009962	OTOP2		otopetrin 2
ENSOCUG00000010046	TK1		thymidine kinase 1
ENSOCUG00000010079		1
ENSOCUG00000010104	FN1	7	fibronectin 1
ENSOCUG00000010253	TMEM209	7	transmembrane protein 209
ENSOCUG00000010300	LGALS12		galectin 12
ENSOCUG00000010370	ZNF605		zinc finger protein 605
ENSOCUG00000010467		1
ENSOCUG00000010524		18
ENSOCUG00000010531	KCTD15	5	potassium channel tetramerization domain containing 15
ENSOCUG00000010546		12
ENSOCUG00000010790	C2CD2L		C2CD2 like
ENSOCUG00000010827	BOC	14	BOC cell adhesion associated, oncogene regulated
ENSOCUG00000010891
ENSOCUG00000010972		12	Oryctolagus cuniculus MHC RLA region class I 19-1 (LOC100328967), mRNA.
ENSOCUG00000011085	CTSS	13	cathepsin S
ENSOCUG00000011137	FBLN1		fibulin 1
ENSOCUG00000011161	LRRC17	7	leucine rich repeat containing 17
ENSOCUG00000011201	CYP4B1	13	Oryctolagus cuniculus CYP4B1-like isozyme short form (CYP4B1), mRNA.
ENSOCUG00000011218	CFAP92	9	cilia and flagella associated protein 92 (putative)
ENSOCUG00000011380	CIDEA	9	cell death inducing DFFA like effector a
ENSOCUG00000011452
ENSOCUG00000011500	TNC		tenascin C
ENSOCUG00000011525	PPL		periplakin
ENSOCUG00000011634	SMPD3	5	sphingomyelin phosphodiesterase 3
ENSOCUG00000011674	BMP2	4	bone morphogenetic protein 2
ENSOCUG00000011683	ANK1		ankyrin 1
ENSOCUG00000011700	VWA2	18	von Willebrand factor A domain containing 2
ENSOCUG00000011731	KRT10	19	keratin 10
ENSOCUG00000011746	NR4A1	4	nuclear receptor subfamily 4 group A member 1
ENSOCUG00000011797	SALL4		spalt like transcription factor 4
ENSOCUG00000011871	KIAA1549		KIAA1549
ENSOCUG00000012010	TNKS2	18	tankyrase 2
ENSOCUG00000012063	JUP	19	junction plakoglobin
ENSOCUG00000012115	AXIN2	19	axin 2
ENSOCUG00000012157	RSAD2		radical S-adenosyl methionine domain containing 2
ENSOCUG00000012201	PPAT	15	phosphoribosyl pyrophosphate amidotransferase
ENSOCUG00000012229	DLGAP3		DLG associated protein 3
ENSOCUG00000012264	COL1A2	10	Oryctolagus cuniculus collagen type I alpha 2 chain (COL1A2), mRNA.
ENSOCUG00000012326	IL18BP	1	interleukin 18 binding protein
ENSOCUG00000012338	DDX3X	X	DEAD-box helicase 3 X-linked
ENSOCUG00000012369	ANKRD37	2	ankyrin repeat domain 37
ENSOCUG00000012443	FAM189A1	17	family with sequence similarity 189 member A1
ENSOCUG00000012565	FUT11	18	fucosyltransferase 11
ENSOCUG00000012637	EPHB3	14	EPH receptor B3
ENSOCUG00000012663	MSTN	7	myostatin
ENSOCUG00000012747	PRKAR2B	7	protein kinase cAMP-dependent type II regulatory subunit beta
ENSOCUG00000012837	GSG1	8	germ cell associated 1
ENSOCUG00000012881	COL1A1	19	collagen type I alpha 1 chain
ENSOCUG00000012971	GLIS2		GLIS family zinc finger 2
ENSOCUG00000013194	PPARG	9	Oryctolagus cuniculus peroxisome proliferator activated receptor gamma (PPARG), mRNA.
ENSOCUG00000013292	SNCG	18	synuclein gamma
ENSOCUG00000013427	DPEP2	5	dipeptidase 2
ENSOCUG00000013533	IGHM		immunoglobulin heavy constant mu
ENSOCUG00000013540	EPHB2	13	EPH receptor B2
ENSOCUG00000013675	FGL2	7	fibrinogen like 2
ENSOCUG00000013676	GSN		gelsolin
ENSOCUG00000013686	WNT5B	8	Wnt family member 5B
ENSOCUG00000013715	C5orf34	11	chromosome 5 open reading frame 34
ENSOCUG00000013731	RUNX1		RUNX family transcription factor 1
ENSOCUG00000013802	ALDOC	19	aldolase, fructose-bisphosphate C
ENSOCUG00000013904	CISH	9	cytokine inducible SH2 containing protein
ENSOCUG00000013971	AOX1	7	aldehyde oxidase 1
ENSOCUG00000014137	NAALAD2	1	N-acetylated alpha-linked acidic dipeptidase 2
ENSOCUG00000014189	ANXA8	18	Oryctolagus cuniculus annexin A8 (ANXA8), mRNA.
ENSOCUG00000014237	GK5	14	glycerol kinase 5
ENSOCUG00000014263	BATF2		basic leucine zipper ATF-like transcription factor 2
ENSOCUG00000014380	ABCA6	19	ATP binding cassette subfamily A member 6
ENSOCUG00000014468	C1S	8	complement C1s
ENSOCUG00000014480	C1R	8	complement C1r
ENSOCUG00000014539	POGLUT3	1	protein O-glucosyltransferase 3
ENSOCUG00000014689	IGF1	4	insulin like growth factor 1
ENSOCUG00000014833	PLA2R1	7	phospholipase A2 receptor 1
ENSOCUG00000014857	COL5A3		collagen type V alpha 3 chain
ENSOCUG00000014914	AEBP1	10	AE binding protein 1
ENSOCUG00000014931		13
ENSOCUG00000014988	COL3A1	7	collagen type III alpha 1 chain
ENSOCUG00000015020	COL5A2	7	collagen type V alpha 2 chain
ENSOCUG00000015121	LRRC4	7	leucine rich repeat containing 4
ENSOCUG00000015138	C1QC	13	complement C1q C chain
ENSOCUG00000015143	C1QB	13	complement C1q B chain
ENSOCUG00000015162	MFAP4		microfibril associated protein 4
ENSOCUG00000015275
ENSOCUG00000015320	COL12A1	12	collagen type XII alpha 1 chain
ENSOCUG00000015331	GPRC5D	8	G protein-coupled receptor class C group 5 member D
ENSOCUG00000015502	GPR83	1	G protein-coupled receptor 83
ENSOCUG00000015623	PLXNA3		Oryctolagus cuniculus plexin A3 (PLXNA3), mRNA.
ENSOCUG00000015723	SLC15A3	1	solute carrier family 15 member 3
ENSOCUG00000015823	OAS2	21	2'-5'-oligoadenylate synthetase 2
ENSOCUG00000015877	SFRP4	10	secreted frizzled related protein 4
ENSOCUG00000015891	RHPN2	5	rhophilin Rho GTPase binding protein 2
ENSOCUG00000015957	MYOC	13	Oryctolagus cuniculus myocilin (MYOC), mRNA.
ENSOCUG00000016201	ANKS6	1	ankyrin repeat and sterile alpha motif domain containing 6
ENSOCUG00000016280	CXCL10	15	C-X-C motif chemokine ligand 10
ENSOCUG00000016451	IER3	12	immediate early response 3
ENSOCUG00000016496	MLPH		melanophilin
ENSOCUG00000016497	COL11A2	12	collagen type XI alpha 2 chain
ENSOCUG00000016499	NQO2		N-ribosyldihydronicotinamide:quinone reductase 2
ENSOCUG00000016591	GFPT2		glutamine-fructose-6-phosphate transaminase 2
ENSOCUG00000016709	PDRG1	4	p53 and DNA damage regulated 1
ENSOCUG00000016769	RIPOR3		RIPOR family member 3
ENSOCUG00000016890	PLVAP		plasmalemma vesicle associated protein
ENSOCUG00000016964	MGP	8	Oryctolagus cuniculus matrix Gla protein (MGP), mRNA.
ENSOCUG00000017033	TFRC	14	transferrin receptor
ENSOCUG00000017105	CHRNA9	2	cholinergic receptor nicotinic alpha 9 subunit
ENSOCUG00000017106
ENSOCUG00000017162		17
ENSOCUG00000017251	GBP1	13	guanylate binding protein 1
ENSOCUG00000017302	SLIT3	3	slit guidance ligand 3
ENSOCUG00000017402	ARSG	19	arylsulfatase G
ENSOCUG00000017494		19
ENSOCUG00000017726	ITGA11	17	integrin subunit alpha 11
ENSOCUG00000017822
ENSOCUG00000017890	MDGA1	12	MAM domain containing glycosylphosphatidylinositol anchor 1
ENSOCUG00000017896	TTC26		tetratricopeptide repeat domain 26
ENSOCUG00000017905	PCK1		phosphoenolpyruvate carboxykinase 1
ENSOCUG00000017909	MGMT		O-6-methylguanine-DNA methyltransferase
ENSOCUG00000017934	ACVR1B	4	activin A receptor type 1B
ENSOCUG00000017952	DSCC1	3	DNA replication and sister chromatid cohesion 1
ENSOCUG00000021037
ENSOCUG00000021056	CSF1R	3	colony stimulating factor 1 receptor
ENSOCUG00000021375
ENSOCUG00000021477
ENSOCUG00000021541	SHMT1		Oryctolagus cuniculus serine hydroxymethyltransferase 1 (SHMT1), mRNA.
ENSOCUG00000021585		17
ENSOCUG00000021619	MAFB		MAF bZIP transcription factor B
ENSOCUG00000021629	RASIP1		Ras interacting protein 1
ENSOCUG00000021647		14
ENSOCUG00000021704	PLEKHH3	19	pleckstrin homology, MyTH4 and FERM domain containing H3
ENSOCUG00000022007	ISLR		immunoglobulin superfamily containing leucine rich repeat
ENSOCUG00000022082	SH2B2		SH2B adaptor protein 2
ENSOCUG00000022309		6
ENSOCUG00000022352		12
ENSOCUG00000022364
ENSOCUG00000022413
ENSOCUG00000022848	SNX33		sorting nexin 33
ENSOCUG00000022849	COPG2	7	coatomer protein complex subunit gamma 2
ENSOCUG00000022951			Oryctolagus cuniculus cytochrome P-450 (LOC100328948), mRNA.
ENSOCUG00000023058	IGSF8	13	immunoglobulin superfamily member 8
ENSOCUG00000023236	TTLL4	7	tubulin tyrosine ligase like 4
ENSOCUG00000023355	MYO7A	1	myosin VIIA
ENSOCUG00000023448	GSTM2	13	glutathione S-transferase mu 2 (muscle)
ENSOCUG00000023470		5
ENSOCUG00000023599	APOD	14	Oryctolagus cuniculus apolipoprotein D (APOD), mRNA.
ENSOCUG00000023764	CCDC80	14	coiled-coil domain containing 80
ENSOCUG00000023813	NME4		NME/NM23 nucleoside diphosphate kinase 4
ENSOCUG00000024108		X
ENSOCUG00000024115	ASGR2	19	asialoglycoprotein receptor 2
ENSOCUG00000024179
ENSOCUG00000024266	PLEKHH2	2	pleckstrin homology, MyTH4 and FERM domain containing H2
ENSOCUG00000024282	PLEKHB2	7	pleckstrin homology domain containing B2
ENSOCUG00000024354		18
ENSOCUG00000024432		3
ENSOCUG00000024443		13
ENSOCUG00000024620
ENSOCUG00000024717		X
ENSOCUG00000024734
ENSOCUG00000024779	ENDOV		endonuclease V
ENSOCUG00000024795	MNDA	13	myeloid cell nuclear differentiation antigen
ENSOCUG00000024825	LRFN1	5	leucine rich repeat and fibronectin type III domain containing 1
ENSOCUG00000024832		12
ENSOCUG00000024931		X
ENSOCUG00000024939	IFIT2	18	interferon induced protein with tetratricopeptide repeats 2
ENSOCUG00000025023		9
ENSOCUG00000025077	ARID3B		AT-rich interaction domain 3B
ENSOCUG00000025093		6
ENSOCUG00000025188	HDAC10		histone deacetylase 10
ENSOCUG00000025473
ENSOCUG00000025513	IGFBP5	7	insulin like growth factor binding protein 5
ENSOCUG00000025598	LYSMD2	17	LysM domain containing 2
ENSOCUG00000025655	GPR161	13	G protein-coupled receptor 161
ENSOCUG00000025689	RTL3	X	retrotransposon Gag like 3
ENSOCUG00000025692	SLC5A3		solute carrier family 5 member 3
ENSOCUG00000025803		19
ENSOCUG00000025816
ENSOCUG00000025868
ENSOCUG00000025924	NXT1	4	nuclear transport factor 2 like export factor 1
ENSOCUG00000026029		1
ENSOCUG00000026070	FAM110A	4	family with sequence similarity 110 member A
ENSOCUG00000026115		10
ENSOCUG00000026233	PLAAT2		phospholipase A and acyltransferase 2
ENSOCUG00000026253		14
ENSOCUG00000026334	GPNMB	10	glycoprotein nmb
ENSOCUG00000026351
ENSOCUG00000026479	SERPING1	1	serpin family G member 1
ENSOCUG00000026515	CXCL11	15	C-X-C motif chemokine ligand 11
ENSOCUG00000026517	RAI2	X	retinoic acid induced 2
ENSOCUG00000026532	SCARA5	2	scavenger receptor class A member 5
ENSOCUG00000026988	CHI3L1	16	chitinase 3 like 1
ENSOCUG00000027125		6
ENSOCUG00000027198	SLC38A4	8	solute carrier family 38 member 4
ENSOCUG00000027406
ENSOCUG00000027585	BCL9L		BCL9 like
ENSOCUG00000027718	PRSS56		serine protease 56
ENSOCUG00000027792	TMEM52		transmembrane protein 52
ENSOCUG00000027849	OAS3	21	2'-5'-oligoadenylate synthetase 3
ENSOCUG00000027882
ENSOCUG00000027909	TOB2		transducer of ERBB2, 2
ENSOCUG00000027981	ISG15		ISG15 ubiquitin like modifier
ENSOCUG00000028224	FAM110B	3	family with sequence similarity 110 member B
ENSOCUG00000029019
ENSOCUG00000029185	ATP1A4	13	ATPase Na+/K+ transporting subunit alpha 4
ENSOCUG00000029254	SHISAL2A	13	shisa like 2A
ENSOCUG00000029263	RARRES1	14	retinoic acid receptor responder 1
ENSOCUG00000029328	OASL		2'-5'-oligoadenylate synthetase like
ENSOCUG00000029358	CRISPLD2		cysteine rich secretory protein LCCL domain containing 2
ENSOCUG00000029367	C1QA	13	complement C1q A chain
ENSOCUG00000029474
ENSOCUG00000029486	GSTA5	12	Glutathione S-transferase Yc
ENSOCUG00000029574	CYP2F1		cytochrome P450 family 2 subfamily F member 1
ENSOCUG00000029601	SMAD3	17	SMAD family member 3
ENSOCUG00000029637
ENSOCUG00000029644	ICAM1		intercellular adhesion molecule 1
ENSOCUG00000029682	CFB	12	complement factor B
ENSOCUG00000029688	HERC6	15	HECT and RLD domain containing E3 ubiquitin protein ligase family member 6
ENSOCUG00000029722	TEKT2		tektin 2
ENSOCUG00000029735
ENSOCUG00000029818
ENSOCUG00000029874
ENSOCUG00000030192		2
ENSOCUG00000030366		X
ENSOCUG00000031036
ENSOCUG00000031084		13
ENSOCUG00000031506
ENSOCUG00000031636
ENSOCUG00000031838
ENSOCUG00000032044		1
ENSOCUG00000032111		16
ENSOCUG00000032132	IFIT3	18	interferon induced protein with tetratricopeptide repeats 3
ENSOCUG00000032475	MRLN	18	Oryctolagus cuniculus myoregulin (LOC103351359), mRNA.
ENSOCUG00000032659
ENSOCUG00000033474		12
ENSOCUG00000034009
ENSOCUG00000034278	FBXL2	14	F-box and leucine rich repeat protein 2
ENSOCUG00000034551		17
ENSOCUG00000034684	SCO2		SCO cytochrome c oxidase assembly protein 2
ENSOCUG00000037050
ENSOCUG00000037967	HIGD1C	4	HIG1 hypoxia inducible domain family member 1C
ENSOCUG00000038853		12
ENSOCUG00000039180
ENSOCUG00000039205
ENSOCUG00000039234
ENSOCUG00000039541	ERF		ETS2 repressor factor
ENSOCUG00000039585	PRRT4	7	proline rich transmembrane protein 4
ENSOCUG00000039590	BASP1	11	brain abundant membrane attached signal protein 1
ENSOCUG00000039598		8

## Sheet: Down_Regulated
Ensembl id	Symbol	Chr	Description
ENSOCUG00000000006	INPP1	7	inositol polyphosphate-1-phosphatase
ENSOCUG00000000076	SLC43A2	19	solute carrier family 43 member 2
ENSOCUG00000000107	MPPE1	9	metallophosphoesterase 1
ENSOCUG00000000224
ENSOCUG00000000422	ZACN		zinc activated ion channel
ENSOCUG00000000464		10
ENSOCUG00000000515	LGALS4	5	galectin 4
ENSOCUG00000000536	IRF8		interferon regulatory factor 8
ENSOCUG00000000568	GLNB2	1	Hemoglobin subunit gamma
ENSOCUG00000000613	TTF2	13	transcription termination factor 2
ENSOCUG00000000694	BDH2	15	3-hydroxybutyrate dehydrogenase 2
ENSOCUG00000000724	SLC7A7	17	solute carrier family 7 member 7
ENSOCUG00000000852	CCDC181	13	coiled-coil domain containing 181
ENSOCUG00000000984	ESRRG	16	estrogen related receptor gamma
ENSOCUG00000001144	SLC6A6	9	solute carrier family 6 member 6
ENSOCUG00000001179	ARHGEF26	14	Rho guanine nucleotide exchange factor 26
ENSOCUG00000001465	PAPPA		pappalysin 1
ENSOCUG00000001596	B3GALT2	16	beta-1,3-galactosyltransferase 2
ENSOCUG00000001801	FOXP2	7	forkhead box P2
ENSOCUG00000001903	NOS2	19	nitric oxide synthase 2
ENSOCUG00000001956	C12orf4	8	chromosome 12 open reading frame 4
ENSOCUG00000002030	TMEM139	7	transmembrane protein 139
ENSOCUG00000002119		12
ENSOCUG00000002140	DACH1	8	dachshund family transcription factor 1
ENSOCUG00000002296	MYZAP	17	myocardial zonula adherens protein
ENSOCUG00000002299	ENAH	16	ENAH actin regulator
ENSOCUG00000002301	CCNB1IP1	17	cyclin B1 interacting protein 1
ENSOCUG00000002320	PIK3IP1	21	phosphoinositide-3-kinase interacting protein 1
ENSOCUG00000002334		19
ENSOCUG00000002342	VSIG8	13	V-set and immunoglobulin domain containing 8
ENSOCUG00000002381		16
ENSOCUG00000002397	UBE4A		ubiquitination factor E4A
ENSOCUG00000002462	SLC24A2	1	solute carrier family 24 member 2
ENSOCUG00000002492	CD36	7	CD36 molecule
ENSOCUG00000002556	BAK1	12	BCL2 antagonist/killer 1
ENSOCUG00000002706	MYCBPAP	19	MYCBP associated protein
ENSOCUG00000002929	CATSPER4	13	cation channel sperm associated 4
ENSOCUG00000002964	AGTPBP1		ATP/GTP binding protein 1
ENSOCUG00000003010	TXNIP	13	thioredoxin interacting protein
ENSOCUG00000003071	LPIN1	2	lipin 1
ENSOCUG00000003182	TMEM140	7	transmembrane protein 140
ENSOCUG00000003200	VGLL2	12	vestigial like family member 2
ENSOCUG00000003271	GAB1	15	GRB2 associated binding protein 1
ENSOCUG00000003323	ARHGAP28	9	Rho GTPase activating protein 28
ENSOCUG00000003388	SCARB2	15	scavenger receptor class B member 2
ENSOCUG00000003567	ZSCAN18		zinc finger and SCAN domain containing 18
ENSOCUG00000003778	AP4B1	13	adaptor related protein complex 4 subunit beta 1
ENSOCUG00000003804	FSIP1	17	fibrous sheath interacting protein 1
ENSOCUG00000003809	KLF11		Kruppel like factor 11
ENSOCUG00000003858	GNMT	12	glycine N-methyltransferase
ENSOCUG00000003871		5	Aspartate aminotransferase, mitochondrial
ENSOCUG00000004103	IRAK4	8	interleukin 1 receptor associated kinase 4
ENSOCUG00000004122	NIPSNAP1		nipsnap homolog 1
ENSOCUG00000004155	ACOX2	9	acyl-CoA oxidase 2
ENSOCUG00000004252	FAM131C		family with sequence similarity 131 member C
ENSOCUG00000004260	TTPAL		alpha tocopherol transfer protein like
ENSOCUG00000004261	SLC35G1	18	solute carrier family 35 member G1
ENSOCUG00000004263	ADH5	15	Oryctolagus cuniculus alcohol dehydrogenase 5 (class III), chi polypeptide (ADH5), mRNA.
ENSOCUG00000004372		13
ENSOCUG00000004378	ARRDC3	11	arrestin domain containing 3
ENSOCUG00000004441	PBLD	18	phenazine biosynthesis like protein domain containing
ENSOCUG00000004762	SYNJ2	12	synaptojanin 2
ENSOCUG00000004821	MLLT11	13	MLLT11 transcription factor 7 cofactor
ENSOCUG00000004865	ARMCX3	X	armadillo repeat containing X-linked 3
ENSOCUG00000004955	GAL3ST2		galactose-3-O-sulfotransferase 2
ENSOCUG00000005032
ENSOCUG00000005035	MAP3K13	14	mitogen-activated protein kinase kinase kinase 13
ENSOCUG00000005112	FBXO32	3	F-box protein 32
ENSOCUG00000005172	ZSCAN30	9	zinc finger and SCAN domain containing 30
ENSOCUG00000005279	TGFB2	16	transforming growth factor beta 2
ENSOCUG00000005309
ENSOCUG00000005324	MAP1A	17	Oryctolagus cuniculus microtubule associated protein 1A (MAP1A), mRNA.
ENSOCUG00000005345	NCEH1	14	neutral cholesterol ester hydrolase 1
ENSOCUG00000005368	AADAC	14	arylacetamide deacetylase
ENSOCUG00000005395	INPP5B		inositol polyphosphate-5-phosphatase B
ENSOCUG00000005617		2
ENSOCUG00000005650	FRAT1	18	FRAT regulator of WNT signaling pathway 1
ENSOCUG00000005716	SLC28A3		solute carrier family 28 member 3
ENSOCUG00000005767	HMGCS2	13	3-hydroxy-3-methylglutaryl-CoA synthase 2
ENSOCUG00000005778	CPED1	7	cadherin like and PC-esterase domain containing 1
ENSOCUG00000005799	CCDC110	2	coiled-coil domain containing 110
ENSOCUG00000005855	ASPA	19	aspartoacylase
ENSOCUG00000005933		6
ENSOCUG00000005975	ACTR1B	2	actin related protein 1B
ENSOCUG00000006022	MINDY4	10	MINDY lysine 48 deubiquitinase 4
ENSOCUG00000006047	MARVELD2	11	MARVEL domain containing 2
ENSOCUG00000006228	SUSD4	16	sushi domain containing 4
ENSOCUG00000006248
ENSOCUG00000006333		3
ENSOCUG00000006350	SLC12A4	5	solute carrier family 12 member 4
ENSOCUG00000006501	PRR16	3	proline rich 16
ENSOCUG00000006508	PDE4B	13	phosphodiesterase 4B
ENSOCUG00000006596	CHST1	1	carbohydrate sulfotransferase 1
ENSOCUG00000006597	CLGN	15	calmegin
ENSOCUG00000006678	JAM2	14	junctional adhesion molecule 2
ENSOCUG00000006839	PGBD5	16	piggyBac transposable element derived 5
ENSOCUG00000006878	EXTL1	13	exostosin like glycosyltransferase 1
ENSOCUG00000006901	ANKRD1	18	Oryctolagus cuniculus ankyrin repeat domain 1 (ANKRD1), mRNA.
ENSOCUG00000006941	PMM1		phosphomannomutase 1
ENSOCUG00000006971	KATNAL2	9	katanin catalytic subunit A1 like 2
ENSOCUG00000007052		3
ENSOCUG00000007119	SLC5A9	13	solute carrier family 5 member 9
ENSOCUG00000007196	C1orf127		chromosome 1 open reading frame 127
ENSOCUG00000007499	LMNB1	3	lamin B1
ENSOCUG00000007516	PFKFB3		6-phosphofructo-2-kinase/fructose-2,6-biphosphatase 3
ENSOCUG00000007599	NR6A1		nuclear receptor subfamily 6 group A member 1
ENSOCUG00000007631	GPM6A	2	glycoprotein M6A
ENSOCUG00000007663	MRO	9	maestro
ENSOCUG00000007669	MYO5A	17	myosin VA
ENSOCUG00000007690
ENSOCUG00000007706	FBXW12	9	F-box and WD repeat domain containing 12
ENSOCUG00000007867	PUS10	2	pseudouridine synthase 10
ENSOCUG00000007881	FLRT2	20	fibronectin leucine rich transmembrane protein 2
ENSOCUG00000007893	GPAM	18	glycerol-3-phosphate acyltransferase, mitochondrial
ENSOCUG00000008174	STAMBPL1	18	STAM binding protein like 1
ENSOCUG00000008175	PDE7A	3	phosphodiesterase 7A
ENSOCUG00000008316	STRIP2	7	striatin interacting protein 2
ENSOCUG00000008329	ADAMTS19	3	ADAM metallopeptidase with thrombospondin type 1 motif 19
ENSOCUG00000008372	MTMR7	2	myotubularin related protein 7
ENSOCUG00000008439	EGR1	3	early growth response 1
ENSOCUG00000008499	FGF10	11	fibroblast growth factor 10
ENSOCUG00000008560		17
ENSOCUG00000008591	ELAPOR1	13	KIAA1324
ENSOCUG00000008678	ENOSF1	9	enolase superfamily member 1
ENSOCUG00000008679
ENSOCUG00000008702	GSTO1	18	glutathione S-transferase omega 1
ENSOCUG00000008769	PCDHAC2	3	protocadherin alpha subfamily C, 2
ENSOCUG00000008772	FANK1		fibronectin type III and ankyrin repeat domains 1
ENSOCUG00000008954	GADD45A	13	growth arrest and DNA damage inducible alpha
ENSOCUG00000009052	EYA1	3	EYA transcriptional coactivator and phosphatase 1
ENSOCUG00000009056	PDILT	6	protein disulfide isomerase like, testis expressed
ENSOCUG00000009100	ANKRD23	2	ankyrin repeat domain 23
ENSOCUG00000009150	TSKS		testis specific serine kinase substrate
ENSOCUG00000009277	RND2	19	Rho family GTPase 2
ENSOCUG00000009279	ABCA1	1	ATP binding cassette subfamily A member 1
ENSOCUG00000009313	SHLD1	4	shieldin complex subunit 1
ENSOCUG00000009330	FMO5	13	flavin containing dimethylaniline monoxygenase 5
ENSOCUG00000009376	MAML3	15	mastermind like transcriptional coactivator 3
ENSOCUG00000009405		20
ENSOCUG00000009450	ARHGAP18	12	Rho GTPase activating protein 18
ENSOCUG00000009512	PLA1A	14	phospholipase A1 member A
ENSOCUG00000009559	SANBR	2	KIAA1841
ENSOCUG00000009645		X
ENSOCUG00000009724	FAIM	14	Fas apoptotic inhibitory molecule
ENSOCUG00000009732	NR1D1	19	nuclear receptor subfamily 1 group D member 1
ENSOCUG00000009866	ANKRD29	9	ankyrin repeat domain 29
ENSOCUG00000010035		5	leucine rich repeat containing 29
ENSOCUG00000010053	SLC9A5	5	solute carrier family 9 member A5
ENSOCUG00000010056	CYP1A2		cytochrome P450 family 1 subfamily A member 2
ENSOCUG00000010063	LRRC49		leucine rich repeat containing 49
ENSOCUG00000010126	ST3GAL5	2	ST3 beta-galactoside alpha-2,3-sialyltransferase 5
ENSOCUG00000010129	SLC46A3		solute carrier family 46 member 3
ENSOCUG00000010229	MYH8	19	myosin heavy chain 8
ENSOCUG00000010388	RBPMS2	17	RNA binding protein, mRNA processing factor 2
ENSOCUG00000010425	FABP5	3	fatty acid binding protein 5
ENSOCUG00000010456	RASGEF1B	15	RasGEF domain family member 1B
ENSOCUG00000010480	ATXN7L1	7	ataxin 7 like 1
ENSOCUG00000010540		5
ENSOCUG00000010550	B3GALT4	12	beta-1,3-galactosyltransferase 4
ENSOCUG00000010654	ARHGAP24	15	Rho GTPase activating protein 24
ENSOCUG00000010706	FOSL2	2	FOS like 2, AP-1 transcription factor subunit
ENSOCUG00000010755	PLCB4	4	phospholipase C beta 4
ENSOCUG00000010818	NEPRO	14	nucleolus and neural progenitor protein
ENSOCUG00000010948	ARMCX5	X	armadillo repeat containing X-linked 5
ENSOCUG00000011067	ITIH1	9	inter-alpha-trypsin inhibitor heavy chain 1
ENSOCUG00000011089	ITIH4	9	Oryctolagus cuniculus inter-alpha-trypsin inhibitor heavy chain 4 (ITIH4), mRNA.
ENSOCUG00000011278		14
ENSOCUG00000011311	KLKB1	2	kallikrein B1
ENSOCUG00000011455	PTPRQ	4	protein tyrosine phosphatase receptor type Q
ENSOCUG00000011456		14
ENSOCUG00000011511	FBN3		fibrillin 3
ENSOCUG00000011583	MCMDC2	3	minichromosome maintenance domain containing 2
ENSOCUG00000011594	PLA2G2D	13	phospholipase A2 group IID
ENSOCUG00000011779	TNFRSF19	8	TNF receptor superfamily member 19
ENSOCUG00000011814	SESN1	12	sestrin 1
ENSOCUG00000011858	TPD52L1	12	TPD52 like 1
ENSOCUG00000011863	HDDC2	12	HD domain containing 2
ENSOCUG00000011945	TRMT2B	X	tRNA methyltransferase 2 homolog B
ENSOCUG00000011954	UNC13B	1	unc-13 homolog B
ENSOCUG00000011978	FAM124B	7	family with sequence similarity 124 member B
ENSOCUG00000012032
ENSOCUG00000012045	PTPRB	4	protein tyrosine phosphatase receptor type B
ENSOCUG00000012051	ANKH	11	ANKH inorganic pyrophosphate transport regulator
ENSOCUG00000012066	SLC25A12	7	solute carrier family 25 member 12
ENSOCUG00000012131	SULT2B1		Oryctolagus cuniculus sulfotransferase family 2B member 1 (SULT2B1), mRNA.
ENSOCUG00000012258	PALMD	13	palmdelphin
ENSOCUG00000012330	WARS2	13	tryptophanyl tRNA synthetase 2, mitochondrial
ENSOCUG00000012416	STON2	20	stonin 2
ENSOCUG00000012564	EIF3K	5	eukaryotic translation initiation factor 3 subunit K
ENSOCUG00000012571	COA4	1	cytochrome c oxidase assembly factor 4 homolog
ENSOCUG00000012611	NET1		neuroepithelial cell transforming 1
ENSOCUG00000012754	RUBCN	14	rubicon autophagy regulator
ENSOCUG00000012863	CDHR3	7	cadherin related family member 3
ENSOCUG00000012868	CHST10	2	carbohydrate sulfotransferase 10
ENSOCUG00000013088	HAUS4	17	HAUS augmin like complex subunit 4
ENSOCUG00000013103	COX7A1		cytochrome c oxidase subunit 7A1
ENSOCUG00000013324	HCRT	19	hypocretin neuropeptide precursor
ENSOCUG00000013327	ABRAXAS1	15	abraxas 1, BRCA1 A complex subunit
ENSOCUG00000013331		X
ENSOCUG00000013456	OMA1	13	OMA1 zinc metallopeptidase
ENSOCUG00000013603	ALAS2	X	5'-aminolevulinate synthase 2
ENSOCUG00000013662	ACADM	13	acyl-CoA dehydrogenase medium chain
ENSOCUG00000013763	DLGAP1	9	DLG associated protein 1
ENSOCUG00000013911		10
ENSOCUG00000013958	MMAB		metabolism of cobalamin associated B
ENSOCUG00000013987	FGF1	3	Oryctolagus cuniculus fibroblast growth factor 1 (FGF1), mRNA.
ENSOCUG00000013992	TSPAN15	18	tetraspanin 15
ENSOCUG00000014089	PLD1	14	phospholipase D1
ENSOCUG00000014198	CAT	1	catalase
ENSOCUG00000014205	AKAP6	17	A-kinase anchoring protein 6
ENSOCUG00000014246	SORD	17	sorbitol dehydrogenase
ENSOCUG00000014438		12
ENSOCUG00000014475	KCNA4	1	potassium voltage-gated channel subfamily A member 4
ENSOCUG00000014556	CCM2L	4	CCM2 like scaffold protein
ENSOCUG00000014610	ABCC4	8	ATP binding cassette subfamily C member 4
ENSOCUG00000014614		14
ENSOCUG00000014646	FEZ1	1	fasciculation and elongation protein zeta 1
ENSOCUG00000014668	PPARGC1A	2	PPARG coactivator 1 alpha
ENSOCUG00000014678	KLHL34	X	kelch like family member 34
ENSOCUG00000014764		X
ENSOCUG00000014801		18
ENSOCUG00000014817			pyroglutamyl-peptidase I like
ENSOCUG00000014850	ITGB6	7	integrin subunit beta 6
ENSOCUG00000014973	GALK1		galactokinase 1
ENSOCUG00000014981	ABCB1	10	ATP binding cassette subfamily B member 1
ENSOCUG00000015027	TMEM266		transmembrane protein 266
ENSOCUG00000015055	DZANK1	4	double zinc ribbon and ankyrin repeat domains 1
ENSOCUG00000015146
ENSOCUG00000015382	MAB21L3	13	mab-21 like 3
ENSOCUG00000015392	METTL21C	8	methyltransferase like 21C
ENSOCUG00000015415	TDRP		testis development related protein
ENSOCUG00000015464	CFAP52	19	cilia and flagella associated protein 52
ENSOCUG00000015511	ABHD12B	17	abhydrolase domain containing 12B
ENSOCUG00000015540	ADAT1	5	adenosine deaminase tRNA specific 1
ENSOCUG00000015757		X
ENSOCUG00000015783	CDKN2AIPNL	3	CDKN2A interacting protein N-terminal like
ENSOCUG00000015831	DUSP23	13	dual specificity phosphatase 23
ENSOCUG00000015852	KCNQ4	13	potassium voltage-gated channel subfamily Q member 4
ENSOCUG00000016034	OIT3	18	oncoprotein induced transcript 3
ENSOCUG00000016043	PLA2G12B	18	phospholipase A2 group XIIB
ENSOCUG00000016098	FGFBP1	2	fibroblast growth factor binding protein 1
ENSOCUG00000016114	AFAP1L1	3	actin filament associated protein 1 like 1
ENSOCUG00000016141	KLF10	3	Kruppel like factor 10
ENSOCUG00000016171	CDH23	18	cadherin related 23
ENSOCUG00000016210	REP15	8	RAB15 effector protein
ENSOCUG00000016228	MANSC4	8	MANSC domain containing 4
ENSOCUG00000016388	EGF	15	epidermal growth factor
ENSOCUG00000016445		12
ENSOCUG00000016465	TP63	14	tumor protein p63
ENSOCUG00000016478	RAD54B	3	RAD54 homolog B
ENSOCUG00000016518	KIAA1217	16	KIAA1217
ENSOCUG00000016531	LACC1	8	laccase domain containing 1
ENSOCUG00000016539	TNFRSF21	12	TNF receptor superfamily member 21
ENSOCUG00000016603	ANGPTL4		angiopoietin like 4
ENSOCUG00000016639	CPT2	13	carnitine palmitoyltransferase 2
ENSOCUG00000016704	GXYLT2	9	glucoside xylosyltransferase 2
ENSOCUG00000016756	NEK1	2	NIMA related kinase 1
ENSOCUG00000016772	DDIT4	18	DNA damage inducible transcript 4
ENSOCUG00000016775	NFKBID		NFKB inhibitor delta
ENSOCUG00000016875	GATB	15	glutamyl-tRNA amidotransferase subunit B
ENSOCUG00000016929	APBB1	1	amyloid beta precursor protein binding family B member 1
ENSOCUG00000017098	C6orf163	12	chromosome 6 open reading frame 163
ENSOCUG00000017113	ASB4	10	ankyrin repeat and SOCS box containing 4
ENSOCUG00000017120	PDK4	10	pyruvate dehydrogenase kinase 4
ENSOCUG00000017141	ACSM1	6	acyl-CoA synthetase medium chain family member 1
ENSOCUG00000017233	H1-3	12	H1.3 linker histone, cluster member
ENSOCUG00000017305	COQ8A	16	coenzyme Q8A
ENSOCUG00000017424	ATF3	16	activating transcription factor 3
ENSOCUG00000017476	EPHX4	13	epoxide hydrolase 4
ENSOCUG00000017519	MYO10	11	myosin X
ENSOCUG00000017527	LRRIQ1	4	leucine rich repeats and IQ motif containing 1
ENSOCUG00000017744	CYP1A1		Cytochrome P450 1A1
ENSOCUG00000017756	C3orf33	14	chromosome 3 open reading frame 33
ENSOCUG00000017793		2
ENSOCUG00000017794	TULP2		TUB like protein 2
ENSOCUG00000017835	DNMT3B	4	DNA methyltransferase 3 beta
ENSOCUG00000017874	STK39	7	serine/threonine kinase 39
ENSOCUG00000021020	KDM8	6	lysine demethylase 8
ENSOCUG00000021270	PARP3	9	poly(ADP-ribose) polymerase family member 3
ENSOCUG00000021293		X
ENSOCUG00000021506	FOS	20	Fos proto-oncogene, AP-1 transcription factor subunit
ENSOCUG00000021716	DHRS4	17	Oryctolagus cuniculus dehydrogenase/reductase (SDR family) member 4 (DHRS4), mRNA.
ENSOCUG00000021767	HYKK		hydroxylysine kinase
ENSOCUG00000021885
ENSOCUG00000021933	CYP2R1	1	cytochrome P450 family 2 subfamily R member 1
ENSOCUG00000022151	DCDC2B		doublecortin domain containing 2B
ENSOCUG00000022219	BEST3	4	bestrophin 3
ENSOCUG00000022239		16
ENSOCUG00000022245	NDRG4	5	NDRG family member 4
ENSOCUG00000022318		13
ENSOCUG00000022444		X
ENSOCUG00000022457	MSANTD4	1	Myb/SANT DNA binding domain containing 4 with coiled-coils
ENSOCUG00000022586
ENSOCUG00000022657		1
ENSOCUG00000022986		13
ENSOCUG00000023074	DDX28	5	DEAD-box helicase 28
ENSOCUG00000023110		13
ENSOCUG00000023408	CITED2	12	Cbp/p300 interacting transactivator with Glu/Asp rich carboxy-terminal domain 2
ENSOCUG00000023535		13	H2B clustered histone 21
ENSOCUG00000023673			ribosomal protein L18
ENSOCUG00000023717	CNKSR1	13	connector enhancer of kinase suppressor of Ras 1
ENSOCUG00000023727	LCAT	5	lecithin-cholesterol acyltransferase
ENSOCUG00000023822
ENSOCUG00000023825	SNCA	15	synuclein alpha
ENSOCUG00000024649		3
ENSOCUG00000024691
ENSOCUG00000025186		4
ENSOCUG00000025283		9
ENSOCUG00000025312		9
ENSOCUG00000025449	CPT1B		carnitine palmitoyltransferase 1B
ENSOCUG00000025663
ENSOCUG00000025701	CRHR1	19	corticotropin releasing hormone receptor 1
ENSOCUG00000025879	ARHGEF5	7	Rho guanine nucleotide exchange factor 5
ENSOCUG00000025901
ENSOCUG00000026275		1
ENSOCUG00000026281	PAK6	17	p21 (RAC1) activated kinase 6
ENSOCUG00000026384	HR		HR lysine demethylase and nuclear receptor corepressor
ENSOCUG00000026591	CRPPA		CDP-L-ribitol pyrophosphorylase A
ENSOCUG00000026636	MYH1	19	Oryctolagus cuniculus myosin heavy chain 1 (MYH4), mRNA.
ENSOCUG00000026640	SESN3	1	sestrin 3
ENSOCUG00000026751	PLBD1	8	phospholipase B domain containing 1
ENSOCUG00000027003		12
ENSOCUG00000027029	ARID5B	18	AT-rich interaction domain 5B
ENSOCUG00000027084		10
ENSOCUG00000027208	MYBPHL	13	myosin binding protein H like
ENSOCUG00000027251	C1orf54	13	chromosome 1 open reading frame 54
ENSOCUG00000027409
ENSOCUG00000027442		4
ENSOCUG00000027492		6
ENSOCUG00000027493	APMAP		adipocyte plasma membrane associated protein
ENSOCUG00000027519	SORBS3		sorbin and SH3 domain containing 3
ENSOCUG00000027587		7
ENSOCUG00000027883	KIAA0408	12	KIAA0408
ENSOCUG00000027987		11
ENSOCUG00000028059	NLRC3		NLR family CARD domain containing 3
ENSOCUG00000029014	C1orf105	13	chromosome 1 open reading frame 105
ENSOCUG00000029235		5	Metallothionein-1A
ENSOCUG00000029357		15
ENSOCUG00000029385
ENSOCUG00000029467	TMEM154	15	transmembrane protein 154
ENSOCUG00000029709	AKR7A3	13	aldo-keto reductase family 7 member A3
ENSOCUG00000031535
ENSOCUG00000031721	HSBP1L1		heat shock factor binding protein 1 like 1
ENSOCUG00000032372
ENSOCUG00000032954	INCA1	19	inhibitor of CDK, cyclin A1 interacting protein 1
ENSOCUG00000033152		1
ENSOCUG00000033434
ENSOCUG00000033730
ENSOCUG00000034117		13
ENSOCUG00000034178		7
ENSOCUG00000034268		21
ENSOCUG00000034665		1
ENSOCUG00000034762		13
ENSOCUG00000034991	UCP3	1	uncoupling protein 3
ENSOCUG00000035586		10
ENSOCUG00000036082		12
ENSOCUG00000036279		17
ENSOCUG00000037055	PET117	4	PET117 cytochrome c oxidase chaperone
ENSOCUG00000037643	SPINT2	5	serine peptidase inhibitor, Kunitz type 2
ENSOCUG00000037839	BBC3		BCL2 binding component 3
ENSOCUG00000037987		X
ENSOCUG00000038454	CTNNA3	18	catenin alpha 3
ENSOCUG00000038496	DHX40	19	DEAH-box helicase 40

## Sheet: GO_Enritchment
group	FDR	nGenes	Pathway size	Fold enriched	Pathway	URL	Genes
Upregulated	2.54e-05	15	103	5.68775596667137	Glycosaminoglycan binding	http://amigo.geneontology.org/amigo/term/GO:0005539	ENSOCUG00000004620, ENSOCUG00000009659, ENSOCUG00000013533, ENSOCUG00000014857, ENSOCUG00000023764, ENSOCUG00000026334, ENSOCUG00000000374, ENSOCUG00000001519, ENSOCUG00000005336, ENSOCUG00000008288, ENSOCUG00000012663, ENSOCUG00000016280, ENSOCUG00000029358, ENSOCUG00000026515, ENSOCUG00000004042
Upregulated	4.04e-05	9	35	9.96494845360825	Extracellular matrix structural constituent	http://amigo.geneontology.org/amigo/term/GO:0005201	ENSOCUG00000009707, ENSOCUG00000011137, ENSOCUG00000012264, ENSOCUG00000012881, ENSOCUG00000014857, ENSOCUG00000014988, ENSOCUG00000015020, ENSOCUG00000016497, ENSOCUG00000031506
Upregulated	2.29e-04	11	67	6.21397012413213	Heparin binding	http://amigo.geneontology.org/amigo/term/GO:0008201	ENSOCUG00000014857, ENSOCUG00000023764, ENSOCUG00000026334, ENSOCUG00000000374, ENSOCUG00000001519, ENSOCUG00000005336, ENSOCUG00000008288, ENSOCUG00000012663, ENSOCUG00000016280, ENSOCUG00000029358, ENSOCUG00000026515
Upregulated	1.31e-03	4	5	22.1443298969072	2-5-prime-oligoadenylate synthetase activity	http://amigo.geneontology.org/amigo/term/GO:0001730	ENSOCUG00000015823, ENSOCUG00000027849, ENSOCUG00000029328, ENSOCUG00000029637
Upregulated	1.31e-03	23	1536	2.75605837461508	Transmembrane signaling receptor activity	http://amigo.geneontology.org/amigo/term/GO:0004888	ENSOCUG00000000355, ENSOCUG00000009659, ENSOCUG00000021056, ENSOCUG00000000258, ENSOCUG00000000725, ENSOCUG00000001333, ENSOCUG00000003473, ENSOCUG00000004633, ENSOCUG00000005356, ENSOCUG00000009360, ENSOCUG00000009958, ENSOCUG00000012637, ENSOCUG00000013540, ENSOCUG00000015331, ENSOCUG00000015502, ENSOCUG00000015623, ENSOCUG00000017105, ENSOCUG00000017726, ENSOCUG00000017934, ENSOCUG00000022413,…
Upregulated	1.32e-03	13	114	4.18424838168305	Sulfur compound binding	http://amigo.geneontology.org/amigo/term/GO:1901681	ENSOCUG00000014857, ENSOCUG00000023764, ENSOCUG00000026334, ENSOCUG00000000374, ENSOCUG00000001519, ENSOCUG00000002425, ENSOCUG00000005336, ENSOCUG00000008288, ENSOCUG00000012663, ENSOCUG00000016280, ENSOCUG00000029358, ENSOCUG00000026515, ENSOCUG00000004042
Upregulated	1.63e-03	27	1652	2.41087462587296	Signaling receptor activity	http://amigo.geneontology.org/amigo/term/GO:0038023	ENSOCUG00000000355, ENSOCUG00000009659, ENSOCUG00000021056, ENSOCUG00000000236, ENSOCUG00000000258, ENSOCUG00000000725, ENSOCUG00000001333, ENSOCUG00000001519, ENSOCUG00000003473, ENSOCUG00000004633, ENSOCUG00000005356, ENSOCUG00000009360, ENSOCUG00000009958, ENSOCUG00000011746, ENSOCUG00000012637, ENSOCUG00000013194, ENSOCUG00000013540, ENSOCUG00000015331, ENSOCUG00000015502, ENSOCUG00000015623,…
Upregulated	1.63e-03	27	1652	2.41087462587296	Molecular transducer activity	http://amigo.geneontology.org/amigo/term/GO:0060089	ENSOCUG00000000355, ENSOCUG00000009659, ENSOCUG00000021056, ENSOCUG00000000236, ENSOCUG00000000258, ENSOCUG00000000725, ENSOCUG00000001333, ENSOCUG00000001519, ENSOCUG00000003473, ENSOCUG00000004633, ENSOCUG00000005356, ENSOCUG00000009360, ENSOCUG00000009958, ENSOCUG00000011746, ENSOCUG00000012637, ENSOCUG00000013194, ENSOCUG00000013540, ENSOCUG00000015331, ENSOCUG00000015502, ENSOCUG00000015623,…
Upregulated	4.75e-03	5	15	10.6463124504362	Fibronectin binding	http://amigo.geneontology.org/amigo/term/GO:0001968	ENSOCUG00000023764, ENSOCUG00000011085, ENSOCUG00000011137, ENSOCUG00000015957, ENSOCUG00000025513
Upregulated	6.88e-03	8	47	5.27245949926362	Collagen binding	http://amigo.geneontology.org/amigo/term/GO:0005518	ENSOCUG00000005336, ENSOCUG00000008288, ENSOCUG00000011085, ENSOCUG00000014914, ENSOCUG00000017726, ENSOCUG00000026029, ENSOCUG00000029601, ENSOCUG00000032044
Upregulated	6.88e-03	4	9	13.840206185567	Platelet-derived growth factor binding	http://amigo.geneontology.org/amigo/term/GO:0048407	ENSOCUG00000000258, ENSOCUG00000012264, ENSOCUG00000012881, ENSOCUG00000014988
Upregulated	7.67e-03	10	87	4.13140483151254	Growth factor binding	http://amigo.geneontology.org/amigo/term/GO:0019838	ENSOCUG00000006145, ENSOCUG00000000258, ENSOCUG00000001412, ENSOCUG00000008561, ENSOCUG00000009086, ENSOCUG00000012264, ENSOCUG00000012881, ENSOCUG00000014988, ENSOCUG00000017934, ENSOCUG00000025513
Downregulated	1.02e-02	3	3	31.9642857142857	Carnitine O-palmitoyltransferase activity	http://amigo.geneontology.org/amigo/term/GO:0004095	ENSOCUG00000016639, ENSOCUG00000025663, ENSOCUG00000025449
Downregulated	1.02e-02	3	3	31.9642857142857	O-palmitoyltransferase activity	http://amigo.geneontology.org/amigo/term/GO:0016416	ENSOCUG00000016639, ENSOCUG00000025663, ENSOCUG00000025449
Downregulated	2.67e-02	3	4	23.9732142857143	Carnitine O-acyltransferase activity	http://amigo.geneontology.org/amigo/term/GO:0016406	ENSOCUG00000016639, ENSOCUG00000025663, ENSOCUG00000025449
Downregulated	7.11e-02	9	141	3.94080234833659	Tetrapyrrole binding	http://amigo.geneontology.org/amigo/term/GO:0046906	ENSOCUG00000009732, ENSOCUG00000013958, ENSOCUG00000014198, ENSOCUG00000000568, ENSOCUG00000001903, ENSOCUG00000010056, ENSOCUG00000017744, ENSOCUG00000021933, ENSOCUG00000027442
Downregulated	7.33e-02	5	40	6.94875776397515	O-acyltransferase activity	http://amigo.geneontology.org/amigo/term/GO:0008374	ENSOCUG00000007893, ENSOCUG00000016639, ENSOCUG00000023727, ENSOCUG00000025663, ENSOCUG00000025449
Downregulated	7.33e-02	2	2	31.9642857142857	Sphingolipid floppase activity	http://amigo.geneontology.org/amigo/term/GO:0046623	ENSOCUG00000009279, ENSOCUG00000014981
Downregulated	7.33e-02	2	2	31.9642857142857	Phosphatidylcholine floppase activity	http://amigo.geneontology.org/amigo/term/GO:0090554	ENSOCUG00000009279, ENSOCUG00000014981
Downregulated	7.33e-02	2	2	31.9642857142857	Estrogen 2-hydroxylase activity	http://amigo.geneontology.org/amigo/term/GO:0101021	ENSOCUG00000010056, ENSOCUG00000017744
Downregulated	7.33e-02	2	2	31.9642857142857	Floppase activity	http://amigo.geneontology.org/amigo/term/GO:0140328	ENSOCUG00000009279, ENSOCUG00000014981
Downregulated	8.10e-02	8	134	3.76050420168067	Heme binding	http://amigo.geneontology.org/amigo/term/GO:0020037	ENSOCUG00000009732, ENSOCUG00000014198, ENSOCUG00000000568, ENSOCUG00000001903, ENSOCUG00000010056, ENSOCUG00000017744, ENSOCUG00000021933, ENSOCUG00000027442
Downregulated	8.34e-02	26	642	1.88025210084034	Oxidoreductase activity	http://amigo.geneontology.org/amigo/term/GO:0016491	ENSOCUG00000004263, ENSOCUG00000008702, ENSOCUG00000014198, ENSOCUG00000023825, ENSOCUG00000000464, ENSOCUG00000000694, ENSOCUG00000001903, ENSOCUG00000004155, ENSOCUG00000006333, ENSOCUG00000008560, ENSOCUG00000009330, ENSOCUG00000010056, ENSOCUG00000013103, ENSOCUG00000013331, ENSOCUG00000013662, ENSOCUG00000014246, ENSOCUG00000014801, ENSOCUG00000017744, ENSOCUG00000021020, ENSOCUG00000021716,…
