# Supplementary material for: Family-based Analysis of Allele-Specific Expression Reveals Mostly Simple, Intermediate-type of Inheritance
Source: Research Square preprint supplement (doi:10.21203/rs.3.rs-6515696/v1), 2025-06-05
Supplement: Supplementary file 7 [file c276b9993456504ca861afd4.xlsx]

## Sheet: all
Sample	Heterozygous	Homozygous_Alteration
mother	9517501	18607460
child_1	11897605	17375538
child_2	11845501	17376134
child_3	11847617	17373343
child_4	11807813	17412656
child_5	11690283	17493245
child_6	11874573	17393958
child_7	11752351	17434102
child_8	11790412	17428400
father	10416784	18170458
