# Supplementary material for: Family-based Analysis of Allele-Specific Expression Reveals Mostly Simple, Intermediate-type of Inheritance
Source: Research Square preprint supplement (doi:10.21203/rs.3.rs-6515696/v1), 2025-06-05
Supplement: Supplementary file 8 [file cbad042f769eaafa0ad6f7c1.xlsx]

## Sheet: H_L_Only_AD_LOG
CHROM	POS	ENSEMBL ID	Gene name	source	mother	child_1	child_2	child_3	child_4	child_5	child_6	child_7	child_8	father
-	-	ENSOCUG00000009473	PANX1	Allele Expression Prediction	H	M	M	M	M	M	M	M	M	L
-	-			Log2FC(relative to father)	2.4	1.6	1.3	1.6	1.4	1.5	2.3	1.9	1.7	0
CM023772.1	79572243			allele_counts(REF|ALT)	0|45	21|23	12|24	12|24	8|33	15|37	21|61	15|24	11|33	7|0
CM023772.1	79572243			Refernce_Allele_Ratio	0.0	0.48	0.33	0.33	0.2	0.29	0.26	0.38	0.25	1.0
CM023772.1	79572420			allele_counts(REF|ALT)	0|91	11|28	19|42	22|33	23|49	12|65	21|61	22|49	23|43	14|0
CM023772.1	79572420			Refernce_Allele_Ratio	0.0	0.28	0.31	0.4	0.32	0.16	0.26	0.31	0.35	1.0
CM023772.1	79572430			allele_counts(REF|ALT)	0|85	10|29	21|38	19|31	20|49	12|60	19|55	19|48	23|41	14|0
CM023772.1	79572430			Refernce_Allele_Ratio	0.0	0.26	0.36	0.38	0.29	0.17	0.26	0.28	0.36	1.0
-	-	ENSOCUG00000024266	PLEKHH2	Allele Expression Prediction	H	M	M	M	M	M	M	M	M	L
-	-			Log2FC(relative to father)	1.9	0.9	0.6	0.2	0.2	-0.0	0.2	0.2	-0.1	0
CM023773.1	159948551			allele_counts(REF|ALT)	39|0	15|6	11|5	4|3	8|4	8|4	13|4	8|8	8|4	0|6
CM023773.1	159948551			Refernce_Allele_Ratio	1.0	0.71	0.69	0.57	0.67	0.67	0.76	0.5	0.67	0.0
CM023773.1	159953692			allele_counts(REF|ALT)	0|23	6|16	4|6	6|6	13|10	3|3	2|13	1|7	4|3	9|0
CM023773.1	159953692			Refernce_Allele_Ratio	0.0	0.27	0.4	0.5	0.57	0.5	0.13	0.12	0.57	1.0
-	-	ENSOCUG00000016709	PDRG1	Allele Expression Prediction	H	M	M	M	M	M	M	M	M	L
-	-			Log2FC(relative to father)	1.3	1.4	1.0	0.9	1.1	0.7	0.6	1.0	1.0	0
CM023775.1	26776709			allele_counts(REF|ALT)	112|0	121|115	136|105	55|132	131|119	47|105	102|84	73|152	119|133	0|160
CM023775.1	26776709			Refernce_Allele_Ratio	1.0	0.51	0.56	0.29	0.52	0.31	0.55	0.32	0.47	0.0
CM023775.1	26776739			allele_counts(REF|ALT)	112|0	205|188	212|155	88|193	208|178	89|152	127|115	111|228	185|190	0|192
CM023775.1	26776739			Refernce_Allele_Ratio	1.0	0.52	0.58	0.31	0.54	0.37	0.52	0.33	0.49	0.0
CM023775.1	26776773			allele_counts(REF|ALT)	112|0	268|227	264|187	107|223	271|221	119|187	150|144	143|261	237|234	0|210
CM023775.1	26776773			Refernce_Allele_Ratio	1.0	0.54	0.59	0.32	0.55	0.39	0.51	0.35	0.5	0.0
CM023775.1	26776809			allele_counts(REF|ALT)	112|0	342|384	327|313	138|315	334|338	158|297	185|191	174|376	277|352	1|270
CM023775.1	26776809			Refernce_Allele_Ratio	1.0	0.47	0.51	0.3	0.5	0.35	0.49	0.32	0.44	0.0
CM023775.1	26776946			allele_counts(REF|ALT)	415|0	332|306	263|256	142|267	278|304	149|251	172|135	161|299	277|277	1|210
CM023775.1	26776946			Refernce_Allele_Ratio	1.0	0.52	0.51	0.35	0.48	0.37	0.56	0.35	0.5	0.0
-	-	ENSOCUG00000034684	SCO2	Allele Expression Prediction	H	M	M	M	M	M	M	M	M	L
-	-			Log2FC(relative to father)	1.4	0.7	0.8	0.9	0.9	0.8	0.9	0.6	0.2	0
CM023775.1	127624438			allele_counts(REF|ALT)	37|0	17|8	12|12	22|14	18|6	11|16	18|11	14|11	11|6	0|12
CM023775.1	127624438			Refernce_Allele_Ratio	1.0	0.68	0.5	0.61	0.75	0.41	0.62	0.56	0.65	0.0
CM023775.1	127624456			allele_counts(REF|ALT)	0|42	9|19	13|12	14|20	12|19	16|9	12|18	9|14	8|12	16|0
CM023775.1	127624456			Refernce_Allele_Ratio	0.0	0.32	0.52	0.41	0.39	0.64	0.4	0.39	0.4	1.0
-	-	ENSOCUG00000021629	RASIP1	Allele Expression Prediction	H	M	M	M	M	M	M	M	M	L
-	-			Log2FC(relative to father)	1.1	1.2	1.1	0.9	1.0	1.2	1.0	1.0	0.9	0
CM023776.1	56147387			allele_counts(REF|ALT)	51|0	42|29	42|42	29|43	49|26	42|32	41|29	44|28	38|38	0|71
CM023776.1	56147387			Refernce_Allele_Ratio	1.0	0.59	0.5	0.4	0.65	0.57	0.59	0.61	0.5	0.0
CM023776.1	56147594			allele_counts(REF|ALT)	0|60	48|55	38|61	48|52	68|45	51|44	40|37	46|48	38|42	12|0
CM023776.1	56147594			Refernce_Allele_Ratio	0.0	0.47	0.38	0.48	0.6	0.54	0.52	0.49	0.47	1.0
CM023776.1	56149071			allele_counts(REF|ALT)	0|51	29|25	26|41	23|31	39|16	27|36	33|29	33|33	32|31	44|0
CM023776.1	56149071			Refernce_Allele_Ratio	0.0	0.54	0.39	0.43	0.71	0.43	0.53	0.5	0.51	1.0
-	-	ENSOCUG00000022413	ENSOCUG00000022413	Allele Expression Prediction	H	M	M	M	M	M	M	M	M	L
-	-			Log2FC(relative to father)	1.6	1.4	1.2	0.9	1.2	0.9	1.6	1.1	1.1	0
CM023776.1	65395892			allele_counts(REF|ALT)	20|0	28|19	20|6	18|8	14|9	16|11	25|9	12|4	16|14	0|9
CM023776.1	65395892			Refernce_Allele_Ratio	1.0	0.6	0.77	0.69	0.61	0.59	0.74	0.75	0.53	0.0
CM023776.1	65395925			allele_counts(REF|ALT)	0|16	18|22	6|14	8|15	12|10	10|11	8|23	8|11	15|16	6|0
CM023776.1	65395925			Refernce_Allele_Ratio	0.0	0.45	0.3	0.35	0.55	0.48	0.26	0.42	0.48	1.0
CM023776.1	65396012			allele_counts(REF|ALT)	34|0	21|14	20|4	12|6	20|12	16|6	22|11	14|4	12|13	0|9
CM023776.1	65396012			Refernce_Allele_Ratio	1.0	0.6	0.83	0.67	0.62	0.73	0.67	0.78	0.48	0.0
CM023776.1	65396225			allele_counts(REF|ALT)	0|29	12|12	10|20	5|15	11|15	9|8	6|8	4|16	7|9	9|0
CM023776.1	65396225			Refernce_Allele_Ratio	0.0	0.5	0.33	0.25	0.42	0.53	0.43	0.2	0.44	1.0
CM023776.1	65396453			allele_counts(REF|ALT)	0|25	10|19	13|26	8|14	8|18	5|22	8|29	6|20	5|7	15|0
CM023776.1	65396453			Refernce_Allele_Ratio	0.0	0.34	0.33	0.36	0.31	0.19	0.22	0.23	0.42	1.0
CM023776.1	65396467			allele_counts(REF|ALT)	0|30	8|18	13|25	8|15	9|17	5|23	8|31	6|21	6|8	20|0
CM023776.1	65396467			Refernce_Allele_Ratio	0.0	0.31	0.34	0.35	0.35	0.18	0.21	0.22	0.43	1.0
CM023776.1	65396573			allele_counts(REF|ALT)	0|34	4|13	8|24	2|19	4|22	5|11	6|17	4|18	4|20	11|0
CM023776.1	65396573			Refernce_Allele_Ratio	0.0	0.24	0.25	0.1	0.15	0.31	0.26	0.18	0.17	1.0
-	-	ENSOCUG00000017896	TTC26	Allele Expression Prediction	H	M	M	M	M	M	M	M	M	L
-	-			Log2FC(relative to father)	2.2	0.5	0.9	0.7	0.6	0.9	0.6	0.4	0.8	0
CM023778.1	958348			allele_counts(REF|ALT)	25|0	5|2	6|9	9|4	7|5	4|10	10|4	9|5	11|5	0|6
CM023778.1	958348			Refernce_Allele_Ratio	1.0	0.71	0.4	0.69	0.58	0.29	0.71	0.64	0.69	0.0
-	-	ENSOCUG00000013971	AOX1	Allele Expression Prediction	H	M	M	M	M	M	M	M	M	L
-	-			Log2FC(relative to father)	1.1	0.1	0.0	0.1	0.1	0.1	0.8	-0.1	0.3	0
CM023778.1	149829597			allele_counts(REF|ALT)	0|21	3|9	2|6	6|7	15|11	13|12	10|14	10|6	17|7	10|0
CM023778.1	149829597			Refernce_Allele_Ratio	0.0	0.25	0.25	0.46	0.58	0.52	0.42	0.62	0.71	1.0
CM023778.1	149864568			allele_counts(REF|ALT)	49|0	19|12	16|19	27|14	22|18	12|13	24|21	18|15	19|22	0|12
CM023778.1	149864568			Refernce_Allele_Ratio	1.0	0.61	0.46	0.66	0.55	0.48	0.53	0.55	0.46	0.0
CM023778.1	149864659			allele_counts(REF|ALT)	49|0	18|21	10|21	22|13	23|13	12|8	21|20	16|15	14|22	0|22
CM023778.1	149864659			Refernce_Allele_Ratio	1.0	0.46	0.32	0.63	0.64	0.6	0.51	0.52	0.39	0.0
-	-	ENSOCUG00000009547	MYO5B	Allele Expression Prediction	H	M	M	M	M	M	M	M	M	L
-	-			Log2FC(relative to father)	1.8	0.5	0.7	0.8	0.5	0.2	0.4	0.6	0.3	0
CM023780.1	98170017			allele_counts(REF|ALT)	0|65	16|28	19|31	7|39	15|31	6|26	4|30	12|27	13|26	34|0
CM023780.1	98170017			Refernce_Allele_Ratio	0.0	0.36	0.38	0.15	0.33	0.19	0.12	0.31	0.33	1.0
CM023780.1	98196793			allele_counts(REF|ALT)	0|51	5|18	8|15	10|21	3|13	4|28	5|18	9|19	5|14	10|0
CM023780.1	98196793			Refernce_Allele_Ratio	0.0	0.22	0.35	0.32	0.19	0.12	0.22	0.32	0.26	1.0
CM023780.1	98206492			allele_counts(REF|ALT)	0|57	5|18	10|25	13|39	7|20	6|19	5|10	12|14	5|10	17|0
CM023780.1	98206492			Refernce_Allele_Ratio	0.0	0.22	0.29	0.25	0.26	0.24	0.33	0.46	0.33	1.0
CM023780.1	98213852			allele_counts(REF|ALT)	0|67	4|7	8|21	7|26	5|23	11|16	8|14	9|12	4|24	21|0
CM023780.1	98213852			Refernce_Allele_Ratio	0.0	0.36	0.28	0.21	0.18	0.41	0.36	0.43	0.14	1.0
CM023780.1	98217289			allele_counts(REF|ALT)	0|44	3|11	3|15	3|12	10|13	5|13	11|13	8|14	12|18	11|0
CM023780.1	98217289			Refernce_Allele_Ratio	0.0	0.21	0.17	0.2	0.43	0.28	0.46	0.36	0.4	1.0
CM023780.1	98217373			allele_counts(REF|ALT)	0|60	3|18	4|23	7|24	14|21	6|13	14|17	15|15	8|21	19|0
CM023780.1	98217373			Refernce_Allele_Ratio	0.0	0.14	0.15	0.23	0.4	0.32	0.45	0.5	0.28	1.0
CM023780.1	98220997			allele_counts(REF|ALT)	35|0	17|3	15|4	17|5	17|11	10|4	14|3	10|9	7|3	0|14
CM023780.1	98220997			Refernce_Allele_Ratio	1.0	0.85	0.79	0.77	0.61	0.71	0.82	0.53	0.7	0.0
CM023780.1	98239630			allele_counts(REF|ALT)	38|0	18|5	29|10	19|7	20|5	15|3	8|15	22|4	22|5	0|18
CM023780.1	98239630			Refernce_Allele_Ratio	1.0	0.78	0.74	0.73	0.8	0.83	0.35	0.85	0.81	0.0
CM023780.1	98240568			allele_counts(REF|ALT)	42|0	19|6	41|6	15|11	30|11	9|9	14|4	23|7	10|5	0|7
CM023780.1	98240568			Refernce_Allele_Ratio	1.0	0.76	0.87	0.58	0.73	0.5	0.78	0.77	0.67	0.0
CM023780.1	98292957			allele_counts(REF|ALT)	0|52	3|12	4|24	5|16	6|19	3|8	7|16	18|14	9|12	20|0
CM023780.1	98292957			Refernce_Allele_Ratio	0.0	0.2	0.14	0.24	0.24	0.27	0.3	0.56	0.43	1.0
-	-	ENSOCUG00000001428	PDE4A	Allele Expression Prediction	H	M	M	M	M	M	M	M	M	L
-	-			Log2FC(relative to father)	1.5	0.9	0.5	0.8	0.5	0.7	0.7	0.6	0.6	0
CM023781.1	6471428			allele_counts(REF|ALT)	0|104	22|59	33|54	26|62	32|49	20|64	19|54	39|52	29|84	38|0
CM023781.1	6471428			Refernce_Allele_Ratio	0.0	0.27	0.38	0.3	0.4	0.24	0.26	0.43	0.26	1.0
CM023781.1	6471575			allele_counts(REF|ALT)	0|95	33|33	21|27	28|40	23|48	27|37	12|29	25|52	25|43	52|0
CM023781.1	6471575			Refernce_Allele_Ratio	0.0	0.5	0.44	0.41	0.32	0.42	0.29	0.32	0.37	1.0
CM023781.1	6471750			allele_counts(REF|ALT)	52|0	97|46	79|43	81|45	75|37	77|46	81|29	89|33	74|33	0|50
CM023781.1	6471750			Refernce_Allele_Ratio	1.0	0.68	0.65	0.64	0.67	0.63	0.74	0.73	0.69	0.0
CM023781.1	6471849			allele_counts(REF|ALT)	494|0	294|140	259|159	284|184	261|146	255|124	266|120	228|118	242|158	0|228
CM023781.1	6471849			Refernce_Allele_Ratio	1.0	0.68	0.62	0.61	0.64	0.67	0.69	0.66	0.6	0.0
CM023781.1	6472007			allele_counts(REF|ALT)	494|0	518|277	444|255	466|266	494|251	509|306	513|263	428|264	469|269	0|390
CM023781.1	6472007			Refernce_Allele_Ratio	1.0	0.65	0.64	0.64	0.66	0.62	0.66	0.62	0.64	0.0
CM023781.1	6472026			allele_counts(REF|ALT)	494|0	497|250	427|228	420|253	443|235	474|288	458|253	399|251	421|253	0|378
CM023781.1	6472026			Refernce_Allele_Ratio	1.0	0.67	0.65	0.62	0.65	0.62	0.64	0.61	0.62	0.0
CM023781.1	6472103			allele_counts(REF|ALT)	0|745	209|306	198|322	219|326	200|325	273|355	188|345	210|315	230|324	335|0
CM023781.1	6472103			Refernce_Allele_Ratio	0.0	0.41	0.38	0.4	0.38	0.43	0.35	0.4	0.42	1.0
CM023781.1	6472297			allele_counts(REF|ALT)	607|0	378|237	331|201	335|212	323|204	358|212	303|196	315|194	344|220	2|335
CM023781.1	6472297			Refernce_Allele_Ratio	1.0	0.61	0.62	0.61	0.61	0.63	0.61	0.62	0.61	0.01
CM023781.1	6472387			allele_counts(REF|ALT)	0|993	308|408	305|391	321|488	302|434	303|462	264|448	260|348	287|465	332|0
CM023781.1	6472387			Refernce_Allele_Ratio	0.0	0.43	0.44	0.4	0.41	0.4	0.37	0.43	0.38	1.0
CM023781.1	6473808			allele_counts(REF|ALT)	52|0	264|238	300|138	311|192	327|186	231|148	358|162	281|177	282|146	1|320
CM023781.1	6473808			Refernce_Allele_Ratio	1.0	0.53	0.68	0.62	0.64	0.61	0.69	0.61	0.66	0.0
CM023781.1	6474936			allele_counts(REF|ALT)	57|0	342|217	297|170	284|182	324|163	272|181	277|175	242|124	277|169	2|252
CM023781.1	6474936			Refernce_Allele_Ratio	1.0	0.61	0.64	0.61	0.67	0.6	0.61	0.66	0.62	0.01
-	-	ENSOCUG00000009088	ENSOCUG00000009088	Allele Expression Prediction	H	M	M	M	M	M	M	M	M	L
-	-			Log2FC(relative to father)	1.4	0.8	0.8	-0.0	0.4	0.5	0.7	0.4	0.5	0
CM023781.1	33302599			allele_counts(REF|ALT)	0|56	9|19	7|30	4|15	6|14	13|12	14|15	5|17	3|13	13|0
CM023781.1	33302599			Refernce_Allele_Ratio	0.0	0.32	0.19	0.21	0.3	0.52	0.48	0.23	0.19	1.0
-	-	ENSOCUG00000017890	MDGA1	Allele Expression Prediction	H	M	M	M	M	M	M	M	M	L
-	-			Log2FC(relative to father)	1.6	1.7	1.3	1.7	1.6	0.5	0.8	1.0	1.1	0
CM023783.1	38830161			allele_counts(REF|ALT)	0|44	32|22	21|18	39|33	52|23	27|12	13|10	22|7	24|17	24|0
CM023783.1	38830161			Refernce_Allele_Ratio	0.0	0.59	0.54	0.54	0.69	0.69	0.57	0.76	0.59	1.0
CM023783.1	38830178			allele_counts(REF|ALT)	44|0	19|31	19|22	30|32	21|45	10|26	11|11	12|18	14|20	0|23
CM023783.1	38830178			Refernce_Allele_Ratio	1.0	0.38	0.46	0.48	0.32	0.28	0.5	0.4	0.41	0.0
CM023783.1	38830328			allele_counts(REF|ALT)	11|0	17|16	6|13	8|13	4|25	8|5	5|7	12|8	13|18	1|11
CM023783.1	38830328			Refernce_Allele_Ratio	1.0	0.52	0.32	0.38	0.14	0.62	0.42	0.6	0.42	0.08
CM023783.1	38830369			allele_counts(REF|ALT)	12|0	21|18	6|6	13|7	12|17	9|7	8|7	10|5	13|13	0|4
CM023783.1	38830369			Refernce_Allele_Ratio	1.0	0.54	0.5	0.65	0.41	0.56	0.53	0.67	0.5	0.0
CM023783.1	38830382			allele_counts(REF|ALT)	0|26	24|25	16|7	14|12	23|19	9|12	12|9	10|13	20|15	12|0
CM023783.1	38830382			Refernce_Allele_Ratio	0.0	0.49	0.7	0.54	0.55	0.43	0.57	0.43	0.57	1.0
CM023783.1	38830392			allele_counts(REF|ALT)	0|27	24|25	16|7	15|14	23|21	10|12	13|10	10|14	21|15	15|0
CM023783.1	38830392			Refernce_Allele_Ratio	0.0	0.49	0.7	0.52	0.52	0.45	0.57	0.42	0.58	1.0
CM023783.1	38835974			allele_counts(REF|ALT)	0|80	36|41	42|41	46|56	37|51	19|20	29|16	27|43	33|24	30|0
CM023783.1	38835974			Refernce_Allele_Ratio	0.0	0.47	0.51	0.45	0.42	0.49	0.64	0.39	0.58	1.0
CM023783.1	38837134			allele_counts(REF|ALT)	0|76	58|53	40|36	35|48	49|52	34|36	43|27	31|24	27|45	37|0
CM023783.1	38837134			Refernce_Allele_Ratio	0.0	0.52	0.53	0.42	0.49	0.49	0.61	0.56	0.38	1.0
CM023783.1	38837215			allele_counts(REF|ALT)	78|0	55|55	50|34	63|49	67|59	46|28	42|43	23|29	51|39	0|48
CM023783.1	38837215			Refernce_Allele_Ratio	1.0	0.5	0.6	0.56	0.53	0.62	0.49	0.44	0.57	0.0
CM023783.1	38844571			allele_counts(REF|ALT)	50|0	28|26	29|25	28|26	28|25	19|15	25|17	33|21	30|23	0|27
CM023783.1	38844571			Refernce_Allele_Ratio	1.0	0.52	0.54	0.52	0.53	0.56	0.6	0.61	0.57	0.0
CM023783.1	38844877			allele_counts(REF|ALT)	74|0	56|45	46|51	61|34	76|50	26|15	31|31	36|35	51|24	0|28
CM023783.1	38844877			Refernce_Allele_Ratio	1.0	0.55	0.47	0.64	0.6	0.63	0.5	0.51	0.68	0.0
CM023783.1	38846985			allele_counts(REF|ALT)	49|0	30|24	30|28	33|19	31|23	25|12	24|25	27|23	33|19	0|25
CM023783.1	38846985			Refernce_Allele_Ratio	1.0	0.56	0.52	0.63	0.57	0.68	0.49	0.54	0.63	0.0
CM023783.1	38847087			allele_counts(REF|ALT)	49|0	56|40	46|40	55|55	39|59	44|25	27|39	33|27	42|38	0|31
CM023783.1	38847087			Refernce_Allele_Ratio	1.0	0.58	0.53	0.5	0.4	0.64	0.41	0.55	0.53	0.0
CM023783.1	38848247			allele_counts(REF|ALT)	0|58	39|31	26|39	27|27	39|34	11|13	26|13	26|34	23|41	18|0
CM023783.1	38848247			Refernce_Allele_Ratio	0.0	0.56	0.4	0.5	0.53	0.46	0.67	0.43	0.36	1.0
CM023783.1	38849967			allele_counts(REF|ALT)	47|0	29|29	25|28	29|30	40|22	35|21	25|23	34|17	36|21	2|24
CM023783.1	38849967			Refernce_Allele_Ratio	1.0	0.5	0.47	0.49	0.65	0.62	0.52	0.67	0.63	0.08
CM023783.1	38850024			allele_counts(REF|ALT)	0|92	38|44	29|38	37|32	27|53	20|31	29|30	22|33	30|39	34|2
CM023783.1	38850024			Refernce_Allele_Ratio	0.0	0.46	0.43	0.54	0.34	0.39	0.49	0.4	0.43	0.94
CM023783.1	38850033			allele_counts(REF|ALT)	93|0	42|33	38|29	35|37	51|26	31|22	28|30	35|21	40|29	1|35
CM023783.1	38850033			Refernce_Allele_Ratio	1.0	0.56	0.57	0.49	0.66	0.58	0.48	0.62	0.58	0.03
CM023783.1	38850084			allele_counts(REF|ALT)	0|85	41|40	26|36	30|39	31|54	24|26	22|23	19|37	25|45	25|0
CM023783.1	38850084			Refernce_Allele_Ratio	0.0	0.51	0.42	0.43	0.36	0.48	0.49	0.34	0.36	1.0
CM023783.1	38855176			allele_counts(REF|ALT)	0|31	21|9	12|20	19|14	14|26	14|20	14|6	9|17	13|13	16|0
CM023783.1	38855176			Refernce_Allele_Ratio	0.0	0.7	0.38	0.58	0.35	0.41	0.7	0.35	0.5	1.0
-	-	ENSOCUG00000023448	GSTM2	Allele Expression Prediction	H	M	M	M	M	M	M	M	M	L
-	-			Log2FC(relative to father)	2.7	2.3	2.0	2.1	2.2	2.1	2.0	2.2	2.2	0
CM023784.1	106628292			allele_counts(REF|ALT)	78|0	261|30	273|37	207|36	266|26	233|24	180|34	212|16	155|37	3|62
CM023784.1	106628292			Refernce_Allele_Ratio	1.0	0.9	0.88	0.85	0.91	0.91	0.84	0.93	0.81	0.05
CM023784.1	106628293			allele_counts(REF|ALT)	78|0	259|30	273|37	207|36	266|26	233|24	180|34	212|16	155|37	3|62
CM023784.1	106628293			Refernce_Allele_Ratio	1.0	0.9	0.88	0.85	0.91	0.91	0.84	0.93	0.81	0.05
-	-	ENSOCUG00000011085	CTSS	Allele Expression Prediction	H	M	M	M	M	M	M	M	M	L
-	-			Log2FC(relative to father)	1.4	0.7	0.8	0.5	0.4	0.4	0.3	0.6	0.7	0
CM023784.1	120197532			allele_counts(REF|ALT)	38|0	14|11	5|15	7|6	14|10	14|8	12|3	5|20	15|14	0|17
CM023784.1	120197532			Refernce_Allele_Ratio	1.0	0.56	0.25	0.54	0.58	0.64	0.8	0.2	0.52	0.0
CM023784.1	120197536			allele_counts(REF|ALT)	38|0	14|11	5|15	7|6	14|10	13|8	12|3	5|20	16|14	0|17
CM023784.1	120197536			Refernce_Allele_Ratio	1.0	0.56	0.25	0.54	0.58	0.62	0.8	0.2	0.53	0.0
-	-	ENSOCUG00000023058	IGSF8	Allele Expression Prediction	H	M	M	M	M	M	M	M	M	L
-	-			Log2FC(relative to father)	1.2	0.7	1.0	0.8	0.7	0.9	1.0	0.7	0.7	0
CM023784.1	128697205			allele_counts(REF|ALT)	0|38	16|13	13|15	13|22	26|16	11|16	9|25	16|16	17|13	15|0
CM023784.1	128697205			Refernce_Allele_Ratio	0.0	0.55	0.46	0.37	0.62	0.41	0.26	0.5	0.57	1.0
CM023784.1	128697576			allele_counts(REF|ALT)	1|79	29|22	17|31	20|23	34|25	23|32	29|28	21|27	17|27	19|0
CM023784.1	128697576			Refernce_Allele_Ratio	0.01	0.57	0.35	0.47	0.58	0.42	0.51	0.44	0.39	1.0
CM023784.1	128698241			allele_counts(REF|ALT)	46|0	30|19	31|32	35|28	31|19	30|46	22|26	32|25	21|18	0|33
CM023784.1	128698241			Refernce_Allele_Ratio	1.0	0.61	0.49	0.56	0.62	0.39	0.46	0.56	0.54	0.0
CM023784.1	128698279			allele_counts(REF|ALT)	1|43	10|20	19|22	20|19	14|18	22|19	20|21	21|24	20|18	22|0
CM023784.1	128698279			Refernce_Allele_Ratio	0.02	0.33	0.46	0.51	0.44	0.54	0.49	0.47	0.53	1.0
CM023784.1	128698570			allele_counts(REF|ALT)	1|88	22|25	33|36	20|23	28|20	25|58	26|36	17|33	41|43	33|0
CM023784.1	128698570			Refernce_Allele_Ratio	0.01	0.47	0.48	0.47	0.58	0.3	0.42	0.34	0.49	1.0
CM023784.1	128699367			allele_counts(REF|ALT)	35|0	25|20	22|34	31|18	28|20	28|24	20|27	19|16	19|16	0|27
CM023784.1	128699367			Refernce_Allele_Ratio	1.0	0.56	0.39	0.63	0.58	0.54	0.43	0.54	0.54	0.0
CM023784.1	128699518			allele_counts(REF|ALT)	47|0	14|11	21|16	16|8	21|15	16|18	32|12	22|9	28|20	0|10
CM023784.1	128699518			Refernce_Allele_Ratio	1.0	0.56	0.57	0.67	0.58	0.47	0.73	0.71	0.58	0.0
CM023784.1	128700490			allele_counts(REF|ALT)	0|59	37|32	36|29	20|30	33|25	29|31	27|33	18|34	34|18	26|0
CM023784.1	128700490			Refernce_Allele_Ratio	0.0	0.54	0.55	0.4	0.57	0.48	0.45	0.35	0.65	1.0
CM023784.1	128700577			allele_counts(REF|ALT)	0|61	24|26	29|45	24|32	28|17	19|23	23|35	15|25	34|28	25|0
CM023784.1	128700577			Refernce_Allele_Ratio	0.0	0.48	0.39	0.43	0.62	0.45	0.4	0.38	0.55	1.0
-	-	ENSOCUG00000015957	MYOC	Allele Expression Prediction	H	M	M	M	M	M	M	M	M	L
-	-			Log2FC(relative to father)	1.5	1.4	1.1	0.9	0.8	0.7	1.1	0.5	0.9	0
CM023784.1	140669159			allele_counts(REF|ALT)	331|0	215|234	219|254	186|152	199|136	173|125	184|157	139|119	208|146	2|130
CM023784.1	140669159			Refernce_Allele_Ratio	1.0	0.48	0.46	0.55	0.59	0.58	0.54	0.54	0.59	0.02
-	-	ENSOCUG00000014237	GK5	Allele Expression Prediction	H	M	M	M	M	M	M	M	M	L
-	-			Log2FC(relative to father)	1.9	1.4	1.3	1.7	1.5	1.5	1.1	1.4	1.7	0
CM023785.1	37476582			allele_counts(REF|ALT)	0|13	2|6	6|13	6|10	3|10	5|12	6|8	3|7	5|14	3|0
CM023785.1	37476582			Refernce_Allele_Ratio	0.0	0.25	0.32	0.38	0.23	0.29	0.43	0.3	0.26	1.0
-	-	ENSOCUG00000021477	ENSOCUG00000021477	Allele Expression Prediction	H	M	M	M	M	M	M	M	M	L
-	-			Log2FC(relative to father)	3.8	3.2	3.0	3.2	3.2	2.8	2.6	3.0	2.9	0
CM023785.1	48942579			allele_counts(REF|ALT)	57|0	23|12	26|10	19|8	41|10	20|10	30|4	23|8	14|16	0|23
CM023785.1	48942579			Refernce_Allele_Ratio	1.0	0.66	0.72	0.7	0.8	0.67	0.88	0.74	0.47	0.0
-	-	ENSOCUG00000025023	ENSOCUG00000025023	Allele Expression Prediction	H	M	M	M	M	M	M	M	M	L
-	-			Log2FC(relative to father)	1.9	1.1	0.8	1.1	0.9	0.6	1.1	1.0	1.0	0
CM023785.1	82704267			allele_counts(REF|ALT)	6|2126	291|1409	288|1416	322|1508	335|1457	210|1258	240|1409	303|1472	281|1455	154|0
CM023785.1	82704267			Refernce_Allele_Ratio	0.0	0.17	0.17	0.18	0.19	0.14	0.15	0.17	0.16	1.0
CM023785.1	82704549			allele_counts(REF|ALT)	1629|0	1559|793	1840|810	1656|717	1479|865	1197|655	1718|814	1801|886	1303|695	22|1357
CM023785.1	82704549			Refernce_Allele_Ratio	1.0	0.66	0.69	0.7	0.63	0.65	0.68	0.67	0.65	0.02
CM023785.1	82704624			allele_counts(REF|ALT)	18|1500	2450|879	2474|865	2277|688	2514|874	2047|627	2389|842	2505|871	2361|684	1441|0
CM023785.1	82704624			Refernce_Allele_Ratio	0.01	0.74	0.74	0.77	0.74	0.77	0.74	0.74	0.78	1.0
CM023785.1	82704780			allele_counts(REF|ALT)	8|2759	2239|2266	2279|2091	2284|2271	2195|2280	2004|1941	2215|2228	2278|2229	2307|2142	1441|0
CM023785.1	82704780			Refernce_Allele_Ratio	0.0	0.5	0.52	0.5	0.49	0.51	0.5	0.51	0.52	1.0
CM023785.1	82704819			allele_counts(REF|ALT)	2826|0	3835|1653	3664|1708	3846|1673	3801|1670	3391|1480	3812|1665	3772|1751	3623|1739	46|2428
CM023785.1	82704819			Refernce_Allele_Ratio	1.0	0.7	0.68	0.7	0.69	0.7	0.7	0.68	0.68	0.02
CM023785.1	82704843			allele_counts(REF|ALT)	19|5067	1459|3918	1453|3878	1452|3946	1403|4004	1189|3702	1359|4032	1494|3984	1402|3926	2335|0
CM023785.1	82704843			Refernce_Allele_Ratio	0.0	0.27	0.27	0.27	0.26	0.24	0.25	0.27	0.26	1.0
CM023785.1	82705005			allele_counts(REF|ALT)	2525|0	2807|887	2827|862	2907|828	2850|855	2659|755	2840|611	2758|660	2849|650	26|1971
CM023785.1	82705005			Refernce_Allele_Ratio	1.0	0.76	0.77	0.78	0.77	0.78	0.82	0.81	0.81	0.01
-	-	ENSOCUG00000021647	ENSOCUG00000021647	Allele Expression Prediction	H	M	M	M	M	M	M	M	M	L
-	-			Log2FC(relative to father)	7.7	6.5	6.2	6.5	6.2	6.0	6.4	6.3	6.3	0
CM023785.1	100100352			allele_counts(REF|ALT)	1|104	79|38	75|45	75|46	65|45	75|45	50|44	78|46	72|32	41|0
CM023785.1	100100352			Refernce_Allele_Ratio	0.01	0.68	0.62	0.62	0.59	0.62	0.53	0.63	0.69	1.0
-	-	ENSOCUG00000025692	SLC5A3	Allele Expression Prediction	H	M	M	M	M	M	M	M	M	L
-	-			Log2FC(relative to father)	1.9	1.6	1.6	1.6	1.4	1.4	1.8	1.6	1.2	0
CM023785.1	170749719			allele_counts(REF|ALT)	81|0	245|76	221|74	233|70	221|78	195|79	224|79	221|88	155|93	1|140
CM023785.1	170749719			Refernce_Allele_Ratio	1.0	0.76	0.75	0.77	0.74	0.71	0.74	0.72	0.62	0.01
CM023785.1	170749891			allele_counts(REF|ALT)	0|549	79|333	141|349	113|294	101|297	164|304	111|384	119|347	124|270	126|0
CM023785.1	170749891			Refernce_Allele_Ratio	0.0	0.19	0.29	0.28	0.25	0.35	0.22	0.26	0.31	1.0
CM023785.1	170750037			allele_counts(REF|ALT)	0|443	83|328	117|304	79|266	92|279	82|235	95|299	118|291	53|238	48|0
CM023785.1	170750037			Refernce_Allele_Ratio	0.0	0.2	0.28	0.23	0.25	0.26	0.24	0.29	0.18	1.0
-	-	ENSOCUG00000025077	ARID3B	Allele Expression Prediction	H	M	M	M	M	M	M	M	M	L
-	-			Log2FC(relative to father)	1.1	0.3	0.5	0.4	0.8	0.5	0.3	0.2	0.3	0
CM023788.1	12619292			allele_counts(REF|ALT)	54|0	12|16	17|22	24|13	44|33	29|37	31|11	27|17	20|21	0|34
CM023788.1	12619292			Refernce_Allele_Ratio	1.0	0.43	0.44	0.65	0.57	0.44	0.74	0.61	0.49	0.0
CM023788.1	12619301			allele_counts(REF|ALT)	54|0	14|16	19|21	27|14	44|31	29|38	33|13	26|17	21|21	0|30
CM023788.1	12619301			Refernce_Allele_Ratio	1.0	0.47	0.47	0.66	0.59	0.43	0.72	0.6	0.5	0.0
CM023788.1	12619311			allele_counts(REF|ALT)	54|0	14|18	20|17	25|13	41|30	26|37	35|13	24|18	21|19	0|34
CM023788.1	12619311			Refernce_Allele_Ratio	1.0	0.44	0.54	0.66	0.58	0.41	0.73	0.57	0.53	0.0
CM023788.1	12619316			allele_counts(REF|ALT)	0|54	14|14	20|19	13|23	30|40	39|26	13|33	17|22	21|20	32|0
CM023788.1	12619316			Refernce_Allele_Ratio	0.0	0.5	0.51	0.36	0.43	0.6	0.28	0.44	0.51	1.0
CM023788.1	12619340			allele_counts(REF|ALT)	52|0	15|14	22|19	22|15	43|28	27|43	35|14	22|17	20|19	0|32
CM023788.1	12619340			Refernce_Allele_Ratio	1.0	0.52	0.54	0.59	0.61	0.39	0.71	0.56	0.51	0.0
CM023788.1	12619437			allele_counts(REF|ALT)	52|0	31|16	29|28	28|28	32|28	42|39	17|24	24|14	27|19	0|28
CM023788.1	12619437			Refernce_Allele_Ratio	1.0	0.66	0.51	0.5	0.53	0.52	0.41	0.63	0.59	0.0
CM023788.1	12620448			allele_counts(REF|ALT)	0|83	25|40	28|45	26|42	43|41	37|30	34|38	22|36	19|26	39|0
CM023788.1	12620448			Refernce_Allele_Ratio	0.0	0.38	0.38	0.38	0.51	0.55	0.47	0.38	0.42	1.0
CM023788.1	12621936			allele_counts(REF|ALT)	0|38	12|20	12|17	8|18	13|22	8|21	14|24	21|20	24|28	25|0
CM023788.1	12621936			Refernce_Allele_Ratio	0.0	0.38	0.41	0.31	0.37	0.28	0.37	0.51	0.46	1.0
CM023788.1	12622134			allele_counts(REF|ALT)	39|0	11|8	23|9	12|7	18|13	13|6	11|5	13|14	12|9	0|5
CM023788.1	12622134			Refernce_Allele_Ratio	1.0	0.58	0.72	0.63	0.58	0.68	0.69	0.48	0.57	0.0
CM023788.1	12622405			allele_counts(REF|ALT)	36|0	28|5	22|14	27|13	21|14	35|26	17|17	18|21	27|19	0|22
CM023788.1	12622405			Refernce_Allele_Ratio	1.0	0.85	0.61	0.68	0.6	0.57	0.5	0.46	0.59	0.0
-	-	ENSOCUG00000027406	ENSOCUG00000027406	Allele Expression Prediction	H	M	M	M	M	M	M	M	M	L
-	-			Log2FC(relative to father)	4.3	3.6	3.4	3.7	3.5	3.2	3.1	3.6	3.6	0
CM023788.1	110046526			allele_counts(REF|ALT)	255|0	181|76	176|66	182|75	188|79	137|67	139|49	196|70	201|89	2|126
CM023788.1	110046526			Refernce_Allele_Ratio	1.0	0.7	0.73	0.71	0.7	0.67	0.74	0.74	0.69	0.02
-	-	ENSOCUG00000005330	ACADSB	Allele Expression Prediction	H	M	M	M	M	M	M	M	M	L
-	-			Log2FC(relative to father)	1.3	0.7	0.8	0.5	0.8	0.7	0.6	0.7	0.6	0
CM023789.1	80671620			allele_counts(REF|ALT)	0|98	13|74	25|67	21|60	21|84	24|66	36|60	22|74	18|82	55|0
CM023789.1	80671620			Refernce_Allele_Ratio	0.0	0.15	0.27	0.26	0.2	0.27	0.38	0.23	0.18	1.0
-	-	ENSOCUG00000021704	PLEKHH3	Allele Expression Prediction	H	M	M	M	M	M	M	M	M	L
-	-			Log2FC(relative to father)	1.1	1.3	1.0	1.3	0.8	1.1	0.9	0.8	0.6	0
CM023790.1	43652438			allele_counts(REF|ALT)	0|207	147|155	116|130	135|172	108|137	123|87	132|130	102|124	117|99	43|0
CM023790.1	43652438			Refernce_Allele_Ratio	0.0	0.49	0.47	0.44	0.44	0.59	0.5	0.45	0.54	1.0
CM023790.1	43653036			allele_counts(REF|ALT)	0|121	112|84	85|92	81|81	59|80	68|63	64|70	78|69	59|63	58|0
CM023790.1	43653036			Refernce_Allele_Ratio	0.0	0.57	0.48	0.5	0.42	0.52	0.48	0.53	0.48	1.0
CM023790.1	43654111			allele_counts(REF|ALT)	55|0	37|35	32|40	39|38	36|30	45|49	35|38	36|35	46|31	0|62
CM023790.1	43654111			Refernce_Allele_Ratio	1.0	0.51	0.44	0.51	0.55	0.48	0.48	0.51	0.6	0.0
CM023790.1	43655617			allele_counts(REF|ALT)	49|0	30|43	47|26	36|34	32|45	37|30	33|34	36|31	25|36	1|55
CM023790.1	43655617			Refernce_Allele_Ratio	1.0	0.41	0.64	0.51	0.42	0.55	0.49	0.54	0.41	0.02
CM023790.1	43655833			allele_counts(REF|ALT)	49|0	88|102	95|107	82|105	78|92	78|79	72|55	103|81	68|77	1|87
CM023790.1	43655833			Refernce_Allele_Ratio	1.0	0.46	0.47	0.44	0.46	0.5	0.57	0.56	0.47	0.01
CM023790.1	43656938			allele_counts(REF|ALT)	54|0	27|44	33|38	39|37	33|36	31|39	36|41	37|36	28|33	0|62
CM023790.1	43656938			Refernce_Allele_Ratio	1.0	0.38	0.46	0.51	0.48	0.44	0.47	0.51	0.46	0.0
CM023790.1	43656983			allele_counts(REF|ALT)	54|0	58|69	53|53	76|77	47|42	47|49	70|61	54|50	46|45	0|64
CM023790.1	43656983			Refernce_Allele_Ratio	1.0	0.46	0.5	0.5	0.53	0.49	0.53	0.52	0.51	0.0
CM023790.1	43656986			allele_counts(REF|ALT)	54|0	60|69	53|53	76|77	48|42	47|49	71|61	54|50	48|45	0|64
CM023790.1	43656986			Refernce_Allele_Ratio	1.0	0.47	0.5	0.5	0.53	0.49	0.54	0.52	0.52	0.0
CM023790.1	43657409			allele_counts(REF|ALT)	52|0	37|26	42|43	27|32	45|28	36|36	35|29	29|27	38|23	0|56
CM023790.1	43657409			Refernce_Allele_Ratio	1.0	0.59	0.49	0.46	0.62	0.5	0.55	0.52	0.62	0.0
CM023790.1	43660142			allele_counts(REF|ALT)	0|93	35|46	32|39	36|56	38|30	55|60	33|34	31|40	30|34	38|0
CM023790.1	43660142			Refernce_Allele_Ratio	0.0	0.43	0.45	0.39	0.56	0.48	0.49	0.44	0.47	1.0
CM023790.1	43660146			allele_counts(REF|ALT)	0|93	35|46	33|39	36|56	38|30	56|60	32|34	31|40	30|34	38|0
CM023790.1	43660146			Refernce_Allele_Ratio	0.0	0.43	0.46	0.39	0.56	0.48	0.48	0.44	0.47	1.0
-	-	ENSOCUG00000012115	AXIN2	Allele Expression Prediction	H	M	M	M	M	M	M	M	M	L
-	-			Log2FC(relative to father)	1.2	0.2	0.4	0.8	0.7	0.7	1.0	0.2	0.3	0
CM023790.1	52267171			allele_counts(REF|ALT)	0|124	39|33	31|38	38|49	63|43	46|45	38|49	28|24	30|51	38|0
CM023790.1	52267171			Refernce_Allele_Ratio	0.0	0.54	0.45	0.44	0.59	0.51	0.44	0.54	0.37	1.0
CM023790.1	52267183			allele_counts(REF|ALT)	125|0	35|38	41|30	50|41	50|56	52|43	53|39	25|32	54|31	2|70
CM023790.1	52267183			Refernce_Allele_Ratio	1.0	0.48	0.58	0.55	0.47	0.55	0.58	0.44	0.64	0.03
CM023790.1	52267196			allele_counts(REF|ALT)	125|0	36|39	41|36	55|42	56|54	49|42	53|37	25|34	53|30	0|71
CM023790.1	52267196			Refernce_Allele_Ratio	1.0	0.48	0.53	0.57	0.51	0.54	0.59	0.42	0.64	0.0
CM023790.1	52270179			allele_counts(REF|ALT)	46|0	28|32	27|32	48|32	40|32	52|25	48|34	38|29	24|27	0|59
CM023790.1	52270179			Refernce_Allele_Ratio	1.0	0.47	0.46	0.6	0.56	0.68	0.59	0.57	0.47	0.0
-	-	ENSOCUG00000024734	ENSOCUG00000024734	Allele Expression Prediction	H	M	M	M	M	M	M	M	M	L
-	-			Log2FC(relative to father)	1.4	0.6	0.5	0.1	0.2	0.5	0.2	0.5	0.4	0
CM023790.1	62537107			allele_counts(REF|ALT)	0|26	13|13	6|12	9|2	5|5	9|13	6|5	7|11	3|11	8|0
CM023790.1	62537107			Refernce_Allele_Ratio	0.0	0.5	0.33	0.82	0.5	0.41	0.55	0.39	0.21	1.0
CM023790.1	62538310			allele_counts(REF|ALT)	2|43	9|6	8|9	11|8	5|12	8|12	11|4	10|9	10|17	11|0
CM023790.1	62538310			Refernce_Allele_Ratio	0.04	0.6	0.47	0.58	0.29	0.4	0.73	0.53	0.37	1.0

## Sheet: L_H_Only_AD_LOG
CHROM	POS	ENSEMBL ID	Gene name	source	mother	child_1	child_2	child_3	child_4	child_5	child_6	child_7	child_8	father
-	-	ENSOCUG00000012571	COA4	Allele Expression Prediction	L	M	M	M	M	M	M	M	M	H
-	-			Log2FC(relative to father)	-1.2	-0.6	-1.1	-0.9	-1.1	-1.0	-1.1	-1.0	-1.2	0
CM023772.1	58982308			allele_counts(REF|ALT)	0|123	77|76	91|60	92|50	87|61	105|36	78|50	96|57	104|39	33|0
CM023772.1	58982308			Refernce_Allele_Ratio	0.0	0.5	0.6	0.65	0.59	0.74	0.61	0.63	0.73	1.0
CM023772.1	58982332			allele_counts(REF|ALT)	0|110	80|75	76|62	77|53	74|53	92|29	71|42	85|47	91|36	33|0
CM023772.1	58982332			Refernce_Allele_Ratio	0.0	0.52	0.55	0.59	0.58	0.76	0.63	0.64	0.72	1.0
CM023772.1	58982353			allele_counts(REF|ALT)	0|119	88|78	75|63	85|54	77|42	106|42	82|42	89|44	94|33	33|0
CM023772.1	58982353			Refernce_Allele_Ratio	0.0	0.53	0.54	0.61	0.65	0.72	0.66	0.67	0.74	1.0
-	-	ENSOCUG00000022457	MSANTD4	Allele Expression Prediction	L	M	M	M	M	M	M	M	M	H
-	-			Log2FC(relative to father)	-1.1	-0.3	-0.4	-0.2	-0.3	-0.8	-0.5	0.1	-0.5	0
CM023772.1	92379446			allele_counts(REF|ALT)	13|0	22|11	21|16	23|19	19|21	17|16	13|11	25|24	22|17	0|39
CM023772.1	92379446			Refernce_Allele_Ratio	1.0	0.67	0.57	0.55	0.47	0.52	0.54	0.51	0.56	0.0
CM023772.1	92379817			allele_counts(REF|ALT)	0|7	6|16	15|12	7|14	15|13	3|11	6|7	7|7	8|17	21|0
CM023772.1	92379817			Refernce_Allele_Ratio	0.0	0.27	0.56	0.33	0.54	0.21	0.46	0.5	0.32	1.0
-	-	ENSOCUG00000022657	ENSOCUG00000022657	Allele Expression Prediction	L	M	M	M	M	M	M	M	M	H
-	-			Log2FC(relative to father)	-2.4	-0.7	-0.9	-0.7	-0.8	-1.3	-0.7	-0.7	-0.8	0
CM023772.1	142028611			allele_counts(REF|ALT)	273|0	695|519	773|494	862|532	774|551	561|388	727|528	781|538	751|542	3|779
CM023772.1	142028611			Refernce_Allele_Ratio	1.0	0.57	0.61	0.62	0.58	0.59	0.58	0.59	0.58	0.0
CM023772.1	142028690			allele_counts(REF|ALT)	605|0	727|1453	725|1457	838|1498	792|1517	592|1292	730|1413	747|1470	690|1483	2|1804
CM023772.1	142028690			Refernce_Allele_Ratio	1.0	0.33	0.33	0.36	0.34	0.31	0.34	0.34	0.32	0.0
CM023772.1	142028836			allele_counts(REF|ALT)	38|1019	2590|523	2527|446	2506|476	2596|488	2188|357	2500|428	2471|390	2511|430	1855|0
CM023772.1	142028836			Refernce_Allele_Ratio	0.04	0.83	0.85	0.84	0.84	0.86	0.85	0.86	0.85	1.0
CM023772.1	142028917			allele_counts(REF|ALT)	746|0	1461|1339	1282|1066	1468|1124	1378|1221	1110|430	1322|538	1344|1102	1296|1311	14|1865
CM023772.1	142028917			Refernce_Allele_Ratio	1.0	0.52	0.55	0.57	0.53	0.72	0.71	0.55	0.5	0.01
CM023772.1	142028920			allele_counts(REF|ALT)	746|0	1462|1339	1283|1066	1435|1191	1374|1221	1088|491	1329|477	1325|1165	1295|1311	15|1858
CM023772.1	142028920			Refernce_Allele_Ratio	1.0	0.52	0.55	0.55	0.53	0.69	0.74	0.53	0.5	0.01
CM023772.1	142028992			allele_counts(REF|ALT)	4|652	1248|506	995|542	1072|536	1071|496	959|403	1126|524	1093|487	1186|431	1198|0
CM023772.1	142028992			Refernce_Allele_Ratio	0.01	0.71	0.65	0.67	0.68	0.7	0.68	0.69	0.73	1.0
CM023772.1	142029067			allele_counts(REF|ALT)	70|2189	1575|1515	1642|1366	1580|1438	1565|1449	1322|1323	1505|1429	1542|1418	1575|1365	1548|0
CM023772.1	142029067			Refernce_Allele_Ratio	0.03	0.51	0.55	0.52	0.52	0.5	0.51	0.52	0.54	1.0
CM023772.1	142029148			allele_counts(REF|ALT)	2325|0	2988|665	2683|632	2815|671	2789|692	2544|598	2673|616	2542|290	2800|681	74|1420
CM023772.1	142029148			Refernce_Allele_Ratio	1.0	0.82	0.81	0.81	0.8	0.81	0.81	0.9	0.8	0.05
CM023772.1	142029154			allele_counts(REF|ALT)	2325|0	2950|671	2630|625	2766|673	2769|691	2502|598	2618|525	2485|253	2744|576	27|1373
CM023772.1	142029154			Refernce_Allele_Ratio	1.0	0.81	0.81	0.8	0.8	0.81	0.83	0.91	0.83	0.02
CM023772.1	142029169			allele_counts(REF|ALT)	1|3313	525|2396	529|2173	512|2315	521|2268	478|2154	391|2269	232|2151	407|2304	740|0
CM023772.1	142029169			Refernce_Allele_Ratio	0.0	0.18	0.2	0.18	0.19	0.18	0.15	0.1	0.15	1.0
CM023772.1	142029349			allele_counts(REF|ALT)	0|169	102|88	107|96	129|121	106|116	82|87	100|125	119|101	70|83	145|0
CM023772.1	142029349			Refernce_Allele_Ratio	0.0	0.54	0.53	0.52	0.48	0.49	0.44	0.54	0.46	1.0
-	-	ENSOCUG00000023822	ENSOCUG00000023822	Allele Expression Prediction	L	M	M	M	M	M	M	M	M	H
-	-			Log2FC(relative to father)	-1.8	-0.8	-1.1	-0.8	-1.1	-1.1	-1.2	-0.8	-0.6	0
CM023772.1	241366249			allele_counts(REF|ALT)	8|0	7|3	17|11	7|9	11|18	11|18	12|17	3|2	13|20	0|55
CM023772.1	241366249			Refernce_Allele_Ratio	1.0	0.7	0.61	0.44	0.38	0.38	0.41	0.6	0.39	0.0
-	-	ENSOCUG00000017793	ENSOCUG00000017793	Allele Expression Prediction	L	M	M	M	M	M	M	M	M	H
-	-			Log2FC(relative to father)	-1.9	-1.5	-1.2	-1.1	-1.7	-1.7	-1.7	-1.6	-1.5	0
CM023773.1	12319760			allele_counts(REF|ALT)	9|0	6|9	2|12	3|13	5|7	3|4	4|10	3|11	5|7	0|39
CM023773.1	12319760			Refernce_Allele_Ratio	1.0	0.4	0.14	0.19	0.42	0.43	0.29	0.21	0.42	0.0
-	-	ENSOCUG00000016756	NEK1	Allele Expression Prediction	L	M	M	M	M	M	M	M	M	H
-	-			Log2FC(relative to father)	-1.1	-0.5	-0.2	-0.5	-0.2	-0.1	-0.1	-0.0	-0.2	0
CM023773.1	54882766			allele_counts(REF|ALT)	0|4	5|5	13|6	7|5	11|12	4|3	9|8	5|4	8|4	11|0
CM023773.1	54882766			Refernce_Allele_Ratio	0.0	0.5	0.68	0.58	0.48	0.57	0.53	0.56	0.67	1.0
-	-	ENSOCUG00000007631	GPM6A	Allele Expression Prediction	L	M	M	M	M	M	M	M	M	H
-	-			Log2FC(relative to father)	-1.2	-0.6	-0.6	-0.7	-0.6	-1.0	-0.9	-0.5	-0.8	0
CM023773.1	60485021			allele_counts(REF|ALT)	0|20	18|25	43|11	25|17	27|20	21|13	16|8	40|15	24|20	35|0
CM023773.1	60485021			Refernce_Allele_Ratio	0.0	0.42	0.8	0.6	0.57	0.62	0.67	0.73	0.55	1.0
CM023773.1	60485642			allele_counts(REF|ALT)	0|11	15|6	12|8	15|7	17|7	3|11	7|5	11|8	13|9	32|0
CM023773.1	60485642			Refernce_Allele_Ratio	0.0	0.71	0.6	0.68	0.71	0.21	0.58	0.58	0.59	1.0
CM023773.1	60485741			allele_counts(REF|ALT)	0|16	14|8	11|16	13|7	11|8	5|8	5|5	7|9	4|9	20|0
CM023773.1	60485741			Refernce_Allele_Ratio	0.0	0.64	0.41	0.65	0.58	0.38	0.5	0.44	0.31	1.0
-	-	ENSOCUG00000009100	ANKRD23	Allele Expression Prediction	L	M	M	M	M	M	M	M	M	H
-	-			Log2FC(relative to father)	-1.6	-0.6	-0.7	-0.5	-0.6	-0.6	-1.2	-0.5	-0.8	0
CM023773.1	110089169			allele_counts(REF|ALT)	11|0	18|8	8|4	5|7	14|7	12|8	10|7	10|6	9|5	0|9
CM023773.1	110089169			Refernce_Allele_Ratio	1.0	0.69	0.67	0.42	0.67	0.6	0.59	0.62	0.64	0.0
CM023773.1	110091473			allele_counts(REF|ALT)	13|2568	2058|1133	2063|1093	1984|1156	2080|1122	1964|1212	2032|947	2031|1136	2053|1151	139|0
CM023773.1	110091473			Refernce_Allele_Ratio	0.01	0.64	0.65	0.63	0.65	0.62	0.68	0.64	0.64	1.0
CM023773.1	110091530			allele_counts(REF|ALT)	17|4522	3329|2025	3352|1984	3310|1923	3373|2012	3162|2141	3440|1686	3298|2045	3352|2002	139|0
CM023773.1	110091530			Refernce_Allele_Ratio	0.0	0.62	0.63	0.63	0.63	0.6	0.67	0.62	0.63	1.0
CM023773.1	110091718			allele_counts(REF|ALT)	8|1585	1352|778	1286|730	1301|774	1394|727	1259|834	1269|573	1331|717	1427|794	139|0
CM023773.1	110091718			Refernce_Allele_Ratio	0.01	0.63	0.64	0.63	0.66	0.6	0.69	0.65	0.64	1.0
CM023773.1	110091955			allele_counts(REF|ALT)	11|3944	3175|2038	3113|2077	3216|2164	3247|2092	2936|2211	2962|1595	3020|2167	3005|2055	139|0
CM023773.1	110091955			Refernce_Allele_Ratio	0.0	0.61	0.6	0.6	0.61	0.57	0.65	0.58	0.59	1.0
CM023773.1	110092377			allele_counts(REF|ALT)	8|1645	1135|841	1149|809	1228|824	1232|780	1148|784	1221|602	1201|781	1265|811	106|0
CM023773.1	110092377			Refernce_Allele_Ratio	0.0	0.57	0.59	0.6	0.61	0.59	0.67	0.61	0.61	1.0
CM023773.1	110092574			allele_counts(REF|ALT)	8|1350	938|719	952|634	1010|687	956|618	894|677	966|513	956|659	1021|683	106|0
CM023773.1	110092574			Refernce_Allele_Ratio	0.01	0.57	0.6	0.6	0.61	0.57	0.65	0.59	0.6	1.0
CM023773.1	110092619			allele_counts(REF|ALT)	16|2966	1975|1562	2106|1456	2209|1459	2148|1384	1935|1551	2117|1208	2034|1507	2076|1472	106|0
CM023773.1	110092619			Refernce_Allele_Ratio	0.01	0.56	0.59	0.6	0.61	0.56	0.64	0.57	0.59	1.0
CM023773.1	110092700			allele_counts(REF|ALT)	15|5267	3724|2629	3920|2467	3935|2516	4060|2225	3746|2386	3947|2161	4010|2407	3968|2260	106|0
CM023773.1	110092700			Refernce_Allele_Ratio	0.0	0.59	0.61	0.61	0.65	0.61	0.65	0.62	0.64	1.0
CM023773.1	110092725			allele_counts(REF|ALT)	24|4650	4051|2168	3942|2175	4113|2091	4430|1791	4179|1895	3966|1968	4287|1958	4246|1850	5446|0
CM023773.1	110092725			Refernce_Allele_Ratio	0.01	0.65	0.64	0.66	0.71	0.69	0.67	0.69	0.7	1.0
CM023773.1	110092726			allele_counts(REF|ALT)	24|4551	3962|2150	3936|2161	4065|2079	4387|1781	4114|1874	3871|1960	4202|1938	4163|1837	5446|0
CM023773.1	110092726			Refernce_Allele_Ratio	0.01	0.65	0.65	0.66	0.71	0.69	0.66	0.68	0.69	1.0
CM023773.1	110092807			allele_counts(REF|ALT)	27|3968	4458|1536	4655|1336	4509|1499	4796|1364	4814|1076	4279|1609	4876|991	4670|1420	5446|0
CM023773.1	110092807			Refernce_Allele_Ratio	0.01	0.74	0.78	0.75	0.78	0.82	0.73	0.83	0.77	1.0
CM023773.1	110092848			allele_counts(REF|ALT)	33|3653	4983|1394	4900|1427	4751|1540	4843|1588	5050|1412	4593|1482	5084|1257	4763|1609	5446|0
CM023773.1	110092848			Refernce_Allele_Ratio	0.01	0.78	0.77	0.76	0.75	0.78	0.76	0.8	0.75	1.0
CM023773.1	110092854			allele_counts(REF|ALT)	34|3624	5134|1439	5095|1433	5078|1521	5063|1634	5198|1405	4785|1494	5277|1249	4896|1642	5446|0
CM023773.1	110092854			Refernce_Allele_Ratio	0.01	0.78	0.78	0.77	0.76	0.79	0.76	0.81	0.75	1.0
CM023773.1	110092871			allele_counts(REF|ALT)	28|3576	5053|1472	5049|1286	5179|1220	4942|1715	5149|1360	4816|1438	5259|1220	4874|1613	5446|0
CM023773.1	110092871			Refernce_Allele_Ratio	0.01	0.77	0.8	0.81	0.74	0.79	0.77	0.81	0.75	1.0
CM023773.1	110092873			allele_counts(REF|ALT)	26|3573	4996|1572	5189|1352	5134|1272	4899|1820	5101|1413	4778|1519	5202|1281	4812|1676	5446|0
CM023773.1	110092873			Refernce_Allele_Ratio	0.01	0.76	0.79	0.8	0.73	0.78	0.76	0.8	0.74	1.0
CM023773.1	110092881			allele_counts(REF|ALT)	29|3969	4956|1662	5121|1428	5018|1353	4867|1911	5075|1496	4731|1597	5171|1358	4771|1781	5446|0
CM023773.1	110092881			Refernce_Allele_Ratio	0.01	0.75	0.78	0.79	0.72	0.77	0.75	0.79	0.73	1.0
CM023773.1	110092921			allele_counts(REF|ALT)	30|4554	4850|1816	4996|1719	4946|1795	4714|2175	5077|1489	4589|1885	5065|1658	4890|1743	5446|0
CM023773.1	110092921			Refernce_Allele_Ratio	0.01	0.73	0.74	0.73	0.68	0.77	0.71	0.75	0.74	1.0
CM023773.1	110092942			allele_counts(REF|ALT)	29|4724	4920|1900	5220|1591	5037|1887	4873|1858	5344|1283	4824|1756	5200|1473	5286|1426	5446|0
CM023773.1	110092942			Refernce_Allele_Ratio	0.01	0.72	0.77	0.73	0.72	0.81	0.73	0.78	0.79	1.0
CM023773.1	110092948			allele_counts(REF|ALT)	27|4619	4886|1546	5132|1295	5005|1519	4843|1747	5247|1047	4835|1372	5243|1224	5232|1086	5446|0
CM023773.1	110092948			Refernce_Allele_Ratio	0.01	0.76	0.8	0.77	0.73	0.83	0.78	0.81	0.83	1.0
-	-	ENSOCUG00000022219	BEST3	Allele Expression Prediction	L	M	M	M	M	M	M	M	M	H
-	-			Log2FC(relative to father)	-1.8	-0.6	-0.7	-1.2	-0.8	-1.6	-1.8	-0.6	-0.7	0
CM023775.1	73888972			allele_counts(REF|ALT)	0|23	24|23	28|27	18|15	35|21	22|15	9|13	27|20	28|20	57|0
CM023775.1	73888972			Refernce_Allele_Ratio	0.0	0.51	0.51	0.55	0.62	0.59	0.41	0.57	0.58	1.0
-	-	ENSOCUG00000003871	ENSOCUG00000003871	Allele Expression Prediction	L	M	M	M	M	M	M	M	M	H
-	-			Log2FC(relative to father)	-1.2	-0.8	-0.9	-0.8	-1.0	-0.9	-1.1	-0.9	-1.0	0
CM023776.1	27980244			allele_counts(REF|ALT)	65|0	360|256	357|270	281|276	355|279	305|296	274|238	325|259	283|287	0|732
CM023776.1	27980244			Refernce_Allele_Ratio	1.0	0.58	0.57	0.5	0.56	0.51	0.54	0.56	0.5	0.0
CM023776.1	27980806			allele_counts(REF|ALT)	62|0	473|495	474|565	434|515	491|535	476|568	399|412	517|478	500|541	1|1464
CM023776.1	27980806			Refernce_Allele_Ratio	1.0	0.49	0.46	0.46	0.48	0.46	0.49	0.52	0.48	0.0
CM023776.1	27980866			allele_counts(REF|ALT)	2|1157	915|846	938|894	949|862	996|863	981|817	704|676	869|907	929|850	1506|0
CM023776.1	27980866			Refernce_Allele_Ratio	0.0	0.52	0.51	0.52	0.54	0.55	0.51	0.49	0.52	1.0
CM023776.1	27983238			allele_counts(REF|ALT)	66|0	804|765	796|720	823|740	713|737	679|717	591|625	709|791	659|619	6|2132
CM023776.1	27983238			Refernce_Allele_Ratio	1.0	0.51	0.53	0.53	0.49	0.49	0.49	0.47	0.52	0.0
CM023776.1	27983967			allele_counts(REF|ALT)	4|263	827|163	812|162	844|156	827|168	768|180	656|139	920|168	800|185	74|0
CM023776.1	27983967			Refernce_Allele_Ratio	0.01	0.84	0.83	0.84	0.83	0.81	0.83	0.85	0.81	1.0
-	-	ENSOCUG00000022245	NDRG4	Allele Expression Prediction	L	M	M	M	M	M	M	M	M	H
-	-			Log2FC(relative to father)	-2.8	-1.0	-1.2	-1.0	-1.4	-1.0	-1.7	-1.0	-0.9	0
CM023776.1	28152995			allele_counts(REF|ALT)	3|0	2|13	12|7	10|15	5|6	4|11	3|4	4|9	5|14	0|22
CM023776.1	28152995			Refernce_Allele_Ratio	1.0	0.13	0.63	0.4	0.45	0.27	0.43	0.31	0.26	0.0
-	-	ENSOCUG00000016775	NFKBID	Allele Expression Prediction	L	M	M	M	M	M	M	M	M	H
-	-			Log2FC(relative to father)	-1.5	-1.6	-1.0	-1.5	-1.6	-1.4	-0.8	-1.3	-1.0	0
CM023776.1	46763669			allele_counts(REF|ALT)	0|11	5|5	18|6	10|3	11|7	12|6	15|10	10|10	14|9	42|0
CM023776.1	46763669			Refernce_Allele_Ratio	0.0	0.5	0.75	0.77	0.61	0.67	0.6	0.5	0.61	1.0
CM023776.1	46763681			allele_counts(REF|ALT)	0|12	9|5	18|6	13|3	11|8	12|6	12|10	12|9	15|8	42|0
CM023776.1	46763681			Refernce_Allele_Ratio	0.0	0.64	0.75	0.81	0.58	0.67	0.55	0.57	0.65	1.0
CM023776.1	46766488			allele_counts(REF|ALT)	8|0	2|6	2|11	5|6	4|5	2|8	3|7	4|6	3|12	0|14
CM023776.1	46766488			Refernce_Allele_Ratio	1.0	0.25	0.15	0.45	0.44	0.2	0.3	0.4	0.2	0.0
CM023776.1	46766941			allele_counts(REF|ALT)	5|0	1|4	7|4	4|5	2|6	3|3	2|10	3|3	8|4	0|26
CM023776.1	46766941			Refernce_Allele_Ratio	1.0	0.2	0.64	0.44	0.25	0.5	0.17	0.5	0.67	0.0
-	-	ENSOCUG00000013103	COX7A1	Allele Expression Prediction	L	M	M	M	M	M	M	M	M	H
-	-			Log2FC(relative to father)	-1.1	-1.0	-1.3	-1.2	-1.2	-0.9	-1.2	-1.0	-1.0	0
CM023776.1	46965526			allele_counts(REF|ALT)	6|1850	1071|920	1169|841	1123|884	1190|829	1142|868	1203|794	1180|841	1086|935	57|0
CM023776.1	46965526			Refernce_Allele_Ratio	0.0	0.54	0.58	0.56	0.59	0.57	0.6	0.58	0.54	1.0
-	-	ENSOCUG00000012564	EIF3K	Allele Expression Prediction	L	M	M	M	M	M	M	M	M	H
-	-			Log2FC(relative to father)	-1.8	-1.4	-1.4	-1.0	-1.2	-1.3	-1.0	-1.0	-1.3	0
CM023776.1	48803903			allele_counts(REF|ALT)	0|127	41|48	35|35	40|49	59|52	50|80	31|21	27|35	21|39	43|0
CM023776.1	48803903			Refernce_Allele_Ratio	0.0	0.46	0.5	0.45	0.53	0.38	0.6	0.44	0.35	1.0
CM023776.1	48807075			allele_counts(REF|ALT)	1|620	213|313	201|257	216|263	251|348	216|287	206|292	243|323	217|324	47|0
CM023776.1	48807075			Refernce_Allele_Ratio	0.0	0.4	0.44	0.45	0.42	0.43	0.41	0.43	0.4	1.0
CM023776.1	48809421			allele_counts(REF|ALT)	0|430	102|177	131|194	104|137	155|207	171|226	123|170	126|210	144|207	49|0
CM023776.1	48809421			Refernce_Allele_Ratio	0.0	0.37	0.4	0.43	0.43	0.43	0.42	0.38	0.41	1.0
CM023776.1	48813393			allele_counts(REF|ALT)	0|29	10|18	10|15	18|15	14|18	12|14	12|18	13|19	14|17	37|0
CM023776.1	48813393			Refernce_Allele_Ratio	0.0	0.36	0.4	0.55	0.44	0.46	0.4	0.41	0.45	1.0
-	-	ENSOCUG00000017794	TULP2	Allele Expression Prediction	L	M	M	M	M	M	M	M	M	H
-	-			Log2FC(relative to father)	-1.5	-1.0	-0.7	-1.0	-0.7	-0.5	-1.0	-1.1	-0.6	0
CM023776.1	56250677			allele_counts(REF|ALT)	8|0	4|12	2|14	5|14	4|11	3|10	3|5	10|2	5|18	0|21
CM023776.1	56250677			Refernce_Allele_Ratio	1.0	0.25	0.12	0.26	0.27	0.23	0.38	0.83	0.22	0.0
-	-	ENSOCUG00000008316	STRIP2	Allele Expression Prediction	L	M	M	M	M	M	M	M	M	H
-	-			Log2FC(relative to father)	-1.5	-0.7	-0.7	-0.7	-0.3	-0.2	-0.3	-0.7	-0.4	0
CM023778.1	21575485			allele_counts(REF|ALT)	39|0	20|38	21|37	11|60	32|38	26|57	21|39	12|39	22|43	0|53
CM023778.1	21575485			Refernce_Allele_Ratio	1.0	0.34	0.36	0.15	0.46	0.31	0.35	0.24	0.34	0.0
CM023778.1	21575515			allele_counts(REF|ALT)	39|0	20|40	27|42	12|66	34|49	28|62	29|44	14|43	24|49	0|66
CM023778.1	21575515			Refernce_Allele_Ratio	1.0	0.33	0.39	0.15	0.41	0.31	0.4	0.25	0.33	0.0
CM023778.1	21576898			allele_counts(REF|ALT)	0|33	44|8	33|16	45|11	49|14	47|17	43|10	39|13	37|16	65|0
CM023778.1	21576898			Refernce_Allele_Ratio	0.0	0.85	0.67	0.8	0.78	0.73	0.81	0.75	0.7	1.0
CM023778.1	21576985			allele_counts(REF|ALT)	35|0	28|78	34|68	25|66	32|92	57|113	41|79	32|66	45|82	0|134
CM023778.1	21576985			Refernce_Allele_Ratio	1.0	0.26	0.33	0.27	0.26	0.34	0.34	0.33	0.35	0.0
-	-	ENSOCUG00000001956	C12orf4	Allele Expression Prediction	L	M	M	M	M	M	M	M	M	H
-	-			Log2FC(relative to father)	-1.3	-1.0	-1.1	-0.9	-0.9	-0.9	-0.4	-0.9	-0.8	0
CM023779.1	106403829			allele_counts(REF|ALT)	0|32	35|19	43|24	38|27	31|26	32|20	41|30	31|25	32|26	47|0
CM023779.1	106403829			Refernce_Allele_Ratio	0.0	0.65	0.64	0.58	0.54	0.62	0.58	0.55	0.55	1.0
-	-	ENSOCUG00000000107	MPPE1	Allele Expression Prediction	L	M	M	M	M	M	M	M	M	H
-	-			Log2FC(relative to father)	-1.2	-0.9	-0.7	-0.8	-1.0	-1.0	-0.9	-0.8	-0.9	0
CM023780.1	56442885			allele_counts(REF|ALT)	10|0	4|3	13|14	12|11	7|16	6|12	5|10	6|6	11|13	1|26
CM023780.1	56442885			Refernce_Allele_Ratio	1.0	0.57	0.48	0.52	0.3	0.33	0.33	0.5	0.46	0.04
CM023780.1	56442906			allele_counts(REF|ALT)	10|0	7|4	15|18	14|16	8|17	6|13	6|11	6|8	11|16	0|32
CM023780.1	56442906			Refernce_Allele_Ratio	1.0	0.64	0.45	0.47	0.32	0.32	0.35	0.43	0.41	0.0
CM023780.1	56451679			allele_counts(REF|ALT)	0|39	26|16	48|32	42|27	24|21	21|12	32|11	32|34	46|27	51|0
CM023780.1	56451679			Refernce_Allele_Ratio	0.0	0.62	0.6	0.61	0.53	0.64	0.74	0.48	0.63	1.0
-	-	ENSOCUG00000026591	CRPPA	Allele Expression Prediction	L	M	M	M	M	M	M	M	M	H
-	-			Log2FC(relative to father)	-1.1	-0.5	-0.4	-0.9	-0.5	-0.5	-0.0	-0.4	-0.4	0
CM023781.1	71241918			allele_counts(REF|ALT)	0|10	5|2	8|4	3|2	11|7	4|3	15|5	7|8	9|3	14|0
CM023781.1	71241918			Refernce_Allele_Ratio	0.0	0.71	0.67	0.6	0.61	0.57	0.75	0.47	0.75	1.0
CM023781.1	71242062			allele_counts(REF|ALT)	0|10	10|4	17|8	7|11	14|6	11|9	18|8	9|4	13|4	19|0
CM023781.1	71242062			Refernce_Allele_Ratio	0.0	0.71	0.68	0.39	0.7	0.55	0.69	0.69	0.76	1.0
CM023781.1	71242093			allele_counts(REF|ALT)	0|8	6|3	7|5	5|11	10|4	6|5	12|8	5|4	6|5	12|0
CM023781.1	71242093			Refernce_Allele_Ratio	0.0	0.67	0.58	0.31	0.71	0.55	0.6	0.56	0.55	1.0
CM023781.1	71390054			allele_counts(REF|ALT)	0|11	7|3	9|12	4|4	9|3	6|5	2|9	10|11	7|10	19|0
CM023781.1	71390054			Refernce_Allele_Ratio	0.0	0.7	0.43	0.5	0.75	0.55	0.18	0.48	0.41	1.0
CM023781.1	71391311			allele_counts(REF|ALT)	17|0	3|10	15|13	4|6	7|12	15|10	11|6	16|11	12|12	0|23
CM023781.1	71391311			Refernce_Allele_Ratio	1.0	0.23	0.54	0.4	0.37	0.6	0.65	0.59	0.5	0.0
-	-	ENSOCUG00000010550	B3GALT4	Allele Expression Prediction	L	M	M	M	M	M	M	M	M	H
-	-			Log2FC(relative to father)	-1.3	-0.5	-0.3	-0.3	-0.7	-0.6	-0.6	-0.5	-0.9	0
CM023783.1	35016468			allele_counts(REF|ALT)	0|53	68|25	80|24	71|18	71|18	56|17	66|15	72|19	52|11	49|0
CM023783.1	35016468			Refernce_Allele_Ratio	0.0	0.73	0.77	0.8	0.8	0.77	0.81	0.79	0.83	1.0
-	-	ENSOCUG00000002556	BAK1	Allele Expression Prediction	L	M	M	M	M	M	M	M	M	H
-	-			Log2FC(relative to father)	-1.1	-0.3	-0.5	-0.6	-0.2	-0.3	-0.6	-0.4	-0.2	0
CM023783.1	35246556			allele_counts(REF|ALT)	0|46	49|44	63|27	41|25	84|47	57|26	52|33	66|32	68|45	105|0
CM023783.1	35246556			Refernce_Allele_Ratio	0.0	0.53	0.7	0.62	0.64	0.69	0.61	0.67	0.6	1.0
CM023783.1	35246912			allele_counts(REF|ALT)	0|67	115|62	120|76	85|55	111|89	95|39	88|48	95|57	104|58	147|0
CM023783.1	35246912			Refernce_Allele_Ratio	0.0	0.65	0.61	0.61	0.56	0.71	0.65	0.62	0.64	1.0
CM023783.1	35247152			allele_counts(REF|ALT)	50|0	32|49	24|46	29|49	39|41	34|53	29|41	27|54	41|40	0|80
CM023783.1	35247152			Refernce_Allele_Ratio	1.0	0.4	0.34	0.37	0.49	0.39	0.41	0.33	0.51	0.0
CM023783.1	35247215			allele_counts(REF|ALT)	0|79	87|45	79|44	75|42	78|56	90|56	60|45	94|55	92|58	129|0
CM023783.1	35247215			Refernce_Allele_Ratio	0.0	0.66	0.64	0.64	0.58	0.62	0.57	0.63	0.61	1.0
CM023783.1	35248342			allele_counts(REF|ALT)	0|94	63|29	73|35	68|32	72|42	74|27	56|30	71|35	77|34	66|0
CM023783.1	35248342			Refernce_Allele_Ratio	0.0	0.68	0.68	0.68	0.63	0.73	0.65	0.67	0.69	1.0
-	-	ENSOCUG00000002119	ENSOCUG00000002119	Allele Expression Prediction	L	M	M	M	M	M	M	M	M	H
-	-			Log2FC(relative to father)	-1.7	-1.1	-0.7	-1.2	-0.9	-1.9	-0.9	-0.8	-1.3	0
CM023783.1	137536619			allele_counts(REF|ALT)	0|21	19|11	14|14	14|8	18|7	6|10	14|7	7|9	11|15	14|0
CM023783.1	137536619			Refernce_Allele_Ratio	0.0	0.63	0.5	0.64	0.72	0.38	0.67	0.44	0.42	1.0
CM023783.1	137536652			allele_counts(REF|ALT)	0|19	19|11	12|14	16|9	20|12	7|10	13|6	5|9	11|14	14|0
CM023783.1	137536652			Refernce_Allele_Ratio	0.0	0.63	0.46	0.64	0.62	0.41	0.68	0.36	0.44	1.0
CM023783.1	137536689			allele_counts(REF|ALT)	0|20	18|15	10|10	17|7	22|10	8|10	12|7	6|12	10|14	16|0
CM023783.1	137536689			Refernce_Allele_Ratio	0.0	0.55	0.5	0.71	0.69	0.44	0.63	0.33	0.42	1.0
CM023783.1	137536736			allele_counts(REF|ALT)	0|19	13|19	13|12	13|7	23|10	12|3	12|6	9|11	9|16	13|0
CM023783.1	137536736			Refernce_Allele_Ratio	0.0	0.41	0.52	0.65	0.7	0.8	0.67	0.45	0.36	1.0
CM023783.1	137553092			allele_counts(REF|ALT)	17|0	11|5	4|2	11|5	5|10	7|3	7|5	6|13	8|10	0|4
CM023783.1	137553092			Refernce_Allele_Ratio	1.0	0.69	0.67	0.69	0.33	0.7	0.58	0.32	0.44	0.0
CM023783.1	137534898			allele_counts(REF|ALT)	16|0	14|10	16|14	11|10	4|18	12|9	6|11	13|14	13|8	0|27
CM023783.1	137534898			Refernce_Allele_Ratio	1.0	0.58	0.53	0.52	0.18	0.57	0.35	0.48	0.62	0.0
CM023783.1	137534899			allele_counts(REF|ALT)	16|0	14|10	16|14	11|10	4|18	12|9	6|11	13|14	13|8	0|27
CM023783.1	137534899			Refernce_Allele_Ratio	1.0	0.58	0.53	0.52	0.18	0.57	0.35	0.48	0.62	0.0
CM023783.1	137534909			allele_counts(REF|ALT)	18|0	15|11	16|13	13|8	4|19	12|10	7|11	13|14	13|8	0|28
CM023783.1	137534909			Refernce_Allele_Ratio	1.0	0.58	0.55	0.62	0.17	0.55	0.39	0.48	0.62	0.0
CM023783.1	137534970			allele_counts(REF|ALT)	0|23	14|21	13|10	10|11	14|4	10|13	19|8	15|11	12|15	33|0
CM023783.1	137534970			Refernce_Allele_Ratio	0.0	0.4	0.57	0.48	0.78	0.43	0.7	0.58	0.44	1.0
CM023783.1	137534976			allele_counts(REF|ALT)	23|0	22|14	11|13	13|9	4|14	13|9	11|18	11|14	16|10	0|30
CM023783.1	137534976			Refernce_Allele_Ratio	1.0	0.61	0.46	0.59	0.22	0.59	0.38	0.44	0.62	0.0
CM023783.1	137535012			allele_counts(REF|ALT)	29|0	20|11	10|10	12|11	5|12	13|10	11|19	5|18	16|10	0|20
CM023783.1	137535012			Refernce_Allele_Ratio	1.0	0.65	0.5	0.52	0.29	0.57	0.37	0.22	0.62	0.0
-	-	ENSOCUG00000015831	DUSP23	Allele Expression Prediction	L	M	M	M	M	M	M	M	M	H
-	-			Log2FC(relative to father)	-2.3	-0.9	-1.0	-0.7	-0.9	-1.0	-1.2	-0.9	-1.0	0
CM023784.1	128355842			allele_counts(REF|ALT)	0|84	128|87	153|75	167|79	169|123	129|68	114|84	159|92	109|95	54|0
CM023784.1	128355842			Refernce_Allele_Ratio	0.0	0.6	0.67	0.68	0.58	0.65	0.58	0.63	0.53	1.0
-	-	ENSOCUG00000023110	ENSOCUG00000023110	Allele Expression Prediction	L	M	M	M	M	M	M	M	M	H
-	-			Log2FC(relative to father)	-1.2	-0.2	-0.4	-0.6	-0.3	-0.3	-0.6	-0.2	-0.3	0
CM023784.1	158285374			allele_counts(REF|ALT)	50|0	36|54	39|53	35|45	34|60	46|59	44|31	35|55	50|45	0|86
CM023784.1	158285374			Refernce_Allele_Ratio	1.0	0.4	0.42	0.44	0.36	0.44	0.59	0.39	0.53	0.0
CM023784.1	158286313			allele_counts(REF|ALT)	60|0	57|75	40|66	52|63	48|85	65|78	47|51	48|80	59|78	0|140
CM023784.1	158286313			Refernce_Allele_Ratio	1.0	0.43	0.38	0.45	0.36	0.45	0.48	0.38	0.43	0.0
-	-	ENSOCUG00000009724	FAIM	Allele Expression Prediction	L	M	M	M	M	M	M	M	M	H
-	-			Log2FC(relative to father)	-1.4	-0.9	-0.5	-1.0	-0.4	-0.7	-1.0	-0.5	-0.6	0
CM023785.1	33964763			allele_counts(REF|ALT)	32|0	6|18	13|22	4|13	16|20	6|14	11|14	5|20	18|20	0|23
CM023785.1	33964763			Refernce_Allele_Ratio	1.0	0.25	0.37	0.24	0.44	0.3	0.44	0.2	0.47	0.0
-	-	ENSOCUG00000010818	NEPRO	Allele Expression Prediction	L	M	M	M	M	M	M	M	M	H
-	-			Log2FC(relative to father)	-1.1	-0.7	-0.9	-0.5	-0.0	-0.4	0.2	-0.3	-0.4	0
CM023785.1	110034328			allele_counts(REF|ALT)	0|8	8|6	6|10	7|11	13|13	19|5	17|8	4|7	14|2	19|0
CM023785.1	110034328			Refernce_Allele_Ratio	0.0	0.57	0.38	0.39	0.5	0.79	0.68	0.36	0.88	1.0
CM023785.1	110043964			allele_counts(REF|ALT)	11|0	6|11	6|10	6|11	4|16	9|13	3|13	7|14	3|13	0|26
CM023785.1	110043964			Refernce_Allele_Ratio	1.0	0.35	0.38	0.35	0.2	0.41	0.19	0.33	0.19	0.0
CM023785.1	110043979			allele_counts(REF|ALT)	11|0	4|10	5|12	6|10	6|17	8|14	3|14	7|14	3|11	0|31
CM023785.1	110043979			Refernce_Allele_Ratio	1.0	0.29	0.29	0.38	0.26	0.36	0.18	0.33	0.21	0.0
-	-	ENSOCUG00000003388	SCARB2	Allele Expression Prediction	L	M	M	M	M	M	M	M	M	H
-	-			Log2FC(relative to father)	-1.3	-0.9	-1.0	-0.9	-1.0	-1.2	-0.7	-1.2	-1.0	0
CM023786.1	29774696			allele_counts(REF|ALT)	0|516	449|235	413|248	436|275	489|276	427|239	509|295	379|245	583|292	907|0
CM023786.1	29774696			Refernce_Allele_Ratio	0.0	0.66	0.62	0.61	0.64	0.64	0.63	0.61	0.67	1.0
CM023786.1	29774856			allele_counts(REF|ALT)	0|646	776|338	766|357	837|335	822|346	701|315	881|383	700|325	823|380	907|0
CM023786.1	29774856			Refernce_Allele_Ratio	0.0	0.7	0.68	0.71	0.7	0.69	0.7	0.68	0.68	1.0
CM023786.1	29774978			allele_counts(REF|ALT)	423|0	267|343	285|337	288|327	266|409	277|347	283|349	293|250	322|295	0|846
CM023786.1	29774978			Refernce_Allele_Ratio	1.0	0.44	0.46	0.47	0.39	0.44	0.45	0.54	0.52	0.0
CM023786.1	29775004			allele_counts(REF|ALT)	423|0	248|127	242|117	241|125	239|133	258|123	252|129	255|95	284|113	1|353
CM023786.1	29775004			Refernce_Allele_Ratio	1.0	0.66	0.67	0.66	0.64	0.68	0.66	0.73	0.72	0.0
CM023786.1	29775152			allele_counts(REF|ALT)	421|0	241|380	298|393	257|364	278|403	232|418	274|432	222|359	271|419	0|1057
CM023786.1	29775152			Refernce_Allele_Ratio	1.0	0.39	0.43	0.41	0.41	0.36	0.39	0.38	0.39	0.0
CM023786.1	29775289			allele_counts(REF|ALT)	421|0	321|479	333|521	321|495	397|499	240|453	344|582	333|380	351|507	0|1269
CM023786.1	29775289			Refernce_Allele_Ratio	1.0	0.4	0.39	0.39	0.44	0.35	0.37	0.47	0.41	0.0
CM023786.1	29775307			allele_counts(REF|ALT)	421|0	341|470	340|495	323|478	395|481	250|448	327|541	319|351	328|483	2|1096
CM023786.1	29775307			Refernce_Allele_Ratio	1.0	0.42	0.41	0.4	0.45	0.36	0.38	0.48	0.4	0.0
CM023786.1	29775309			allele_counts(REF|ALT)	421|0	341|470	340|495	323|478	395|481	250|448	327|540	319|351	328|483	0|1099
CM023786.1	29775309			Refernce_Allele_Ratio	1.0	0.42	0.41	0.4	0.45	0.36	0.38	0.48	0.4	0.0
CM023786.1	29775349			allele_counts(REF|ALT)	421|0	300|497	322|536	295|456	347|503	244|478	317|498	282|360	287|491	1|1159
CM023786.1	29775349			Refernce_Allele_Ratio	1.0	0.38	0.38	0.39	0.41	0.34	0.39	0.44	0.37	0.0
CM023786.1	29775384			allele_counts(REF|ALT)	421|0	230|426	262|471	253|396	282|460	211|456	249|495	237|357	252|450	5|1043
CM023786.1	29775384			Refernce_Allele_Ratio	1.0	0.35	0.36	0.39	0.38	0.32	0.33	0.4	0.36	0.0
CM023786.1	29775439			allele_counts(REF|ALT)	4|571	467|275	519|284	448|322	555|331	559|312	582|308	425|266	574|324	1013|0
CM023786.1	29775439			Refernce_Allele_Ratio	0.01	0.63	0.65	0.58	0.63	0.64	0.65	0.62	0.64	1.0
CM023786.1	29775468			allele_counts(REF|ALT)	477|0	270|424	266|519	323|453	326|545	313|537	333|575	271|399	337|551	0|1345
CM023786.1	29775468			Refernce_Allele_Ratio	1.0	0.39	0.34	0.42	0.37	0.37	0.37	0.4	0.38	0.0
CM023786.1	29775544			allele_counts(REF|ALT)	0|468	434|224	485|216	412|255	476|282	416|242	548|267	345|231	491|247	1193|0
CM023786.1	29775544			Refernce_Allele_Ratio	0.0	0.66	0.69	0.62	0.63	0.63	0.67	0.6	0.67	1.0
CM023786.1	29793195			allele_counts(REF|ALT)	0|309	234|169	309|136	269|143	259|155	196|139	248|141	213|128	225|161	52|0
CM023786.1	29793195			Refernce_Allele_Ratio	0.0	0.58	0.69	0.65	0.63	0.59	0.64	0.62	0.58	1.0
CM023786.1	29842117			allele_counts(REF|ALT)	0|113	61|70	73|72	78|77	94|75	77|79	77|88	60|63	76|56	56|0
CM023786.1	29842117			Refernce_Allele_Ratio	0.0	0.47	0.5	0.5	0.56	0.49	0.47	0.49	0.58	1.0
CM023786.1	29842135			allele_counts(REF|ALT)	0|95	43|59	53|60	60|62	71|60	72|70	55|68	48|56	58|43	56|0
CM023786.1	29842135			Refernce_Allele_Ratio	0.0	0.42	0.47	0.49	0.54	0.51	0.45	0.46	0.57	1.0
CM023786.1	29842176			allele_counts(REF|ALT)	0|39	21|21	34|26	23|29	36|37	54|37	24|29	25|21	28|24	56|0
CM023786.1	29842176			Refernce_Allele_Ratio	0.0	0.5	0.57	0.44	0.49	0.59	0.45	0.54	0.54	1.0
-	-	ENSOCUG00000010456	RASGEF1B	Allele Expression Prediction	L	M	M	M	M	M	M	M	M	H
-	-			Log2FC(relative to father)	-1.4	-1.2	-0.9	-1.3	-0.7	-0.7	-0.5	-0.6	-0.5	0
CM023786.1	35294900			allele_counts(REF|ALT)	11|0	4|11	6|10	2|8	5|6	11|9	5|17	12|9	11|9	0|33
CM023786.1	35294900			Refernce_Allele_Ratio	1.0	0.27	0.38	0.2	0.45	0.55	0.23	0.57	0.55	0.0
CM023786.1	35294929			allele_counts(REF|ALT)	0|11	12|6	15|6	8|2	4|4	9|9	21|5	10|10	7|14	30|0
CM023786.1	35294929			Refernce_Allele_Ratio	0.0	0.67	0.71	0.8	0.5	0.5	0.81	0.5	0.33	1.0
CM023786.1	35294992			allele_counts(REF|ALT)	9|0	1|9	7|11	1|6	5|4	7|6	5|10	6|11	9|6	1|18
CM023786.1	35294992			Refernce_Allele_Ratio	1.0	0.1	0.39	0.14	0.56	0.54	0.33	0.35	0.6	0.05
CM023786.1	35300950			allele_counts(REF|ALT)	0|8	12|4	13|8	4|7	10|10	10|6	4|4	5|8	16|13	21|0
CM023786.1	35300950			Refernce_Allele_Ratio	0.0	0.75	0.62	0.36	0.5	0.62	0.5	0.38	0.55	1.0
CM023786.1	35316270			allele_counts(REF|ALT)	0|8	4|2	8|4	11|4	9|2	19|7	8|9	7|5	4|3	22|0
CM023786.1	35316270			Refernce_Allele_Ratio	0.0	0.67	0.67	0.73	0.82	0.73	0.47	0.58	0.57	1.0
-	-	ENSOCUG00000004263	ADH5	Allele Expression Prediction	L	M	M	M	M	M	M	M	M	H
-	-			Log2FC(relative to father)	-1.6	-0.5	-0.8	-0.7	-0.5	-0.6	-0.5	-0.3	-0.4	0
CM023786.1	53824684			allele_counts(REF|ALT)	0|183	264|111	244|110	240|105	269|128	240|106	236|105	334|123	284|125	47|0
CM023786.1	53824684			Refernce_Allele_Ratio	0.0	0.7	0.69	0.7	0.68	0.69	0.69	0.73	0.69	1.0
CM023786.1	53825014			allele_counts(REF|ALT)	0|86	80|40	77|54	59|35	108|47	88|52	74|55	108|51	107|43	46|0
CM023786.1	53825014			Refernce_Allele_Ratio	0.0	0.67	0.59	0.63	0.7	0.63	0.57	0.68	0.71	1.0
CM023786.1	53825074			allele_counts(REF|ALT)	0|149	152|71	150|103	151|81	227|105	178|96	176|106	226|115	212|104	46|0
CM023786.1	53825074			Refernce_Allele_Ratio	0.0	0.68	0.59	0.65	0.68	0.65	0.62	0.66	0.67	1.0
CM023786.1	53829495			allele_counts(REF|ALT)	1|98	229|60	229|82	228|61	290|104	256|90	242|77	276|107	315|95	56|0
CM023786.1	53829495			Refernce_Allele_Ratio	0.01	0.79	0.74	0.79	0.74	0.74	0.76	0.72	0.77	1.0
-	-	ENSOCUG00000010063	LRRC49	Allele Expression Prediction	L	M	M	M	M	M	M	M	M	H
-	-			Log2FC(relative to father)	-1.5	-1.6	-0.6	-1.6	-1.5	-1.4	-0.6	-1.2	-1.2	0
CM023788.1	9599099			allele_counts(REF|ALT)	0|4	3|2	4|7	3|5	13|4	1|2	3|3	2|4	1|8	10|0
CM023788.1	9599099			Refernce_Allele_Ratio	0.0	0.6	0.36	0.38	0.76	0.33	0.5	0.33	0.11	1.0
-	-	ENSOCUG00000021767	HYKK	Allele Expression Prediction	L	M	M	M	M	M	M	M	M	H
-	-			Log2FC(relative to father)	-1.6	-0.8	-0.6	-0.6	-0.3	-0.5	-0.6	-0.4	-0.3	0
CM023788.1	15736575			allele_counts(REF|ALT)	7|0	3|4	5|9	2|9	8|13	5|6	5|8	12|6	5|9	0|11
CM023788.1	15736575			Refernce_Allele_Ratio	1.0	0.43	0.36	0.18	0.38	0.45	0.38	0.67	0.36	0.0
CM023788.1	15736576			allele_counts(REF|ALT)	7|0	3|4	5|9	2|9	8|13	5|6	5|8	12|6	5|9	0|11
CM023788.1	15736576			Refernce_Allele_Ratio	1.0	0.43	0.36	0.18	0.38	0.45	0.38	0.67	0.36	0.0
CM023788.1	15736599			allele_counts(REF|ALT)	5|0	3|5	6|6	1|7	5|8	3|5	5|3	9|3	5|7	0|11
CM023788.1	15736599			Refernce_Allele_Ratio	1.0	0.38	0.5	0.12	0.38	0.38	0.62	0.75	0.42	0.0
CM023788.1	15746643			allele_counts(REF|ALT)	7|0	2|6	6|8	3|6	5|7	1|5	3|4	2|4	7|4	0|10
CM023788.1	15746643			Refernce_Allele_Ratio	1.0	0.25	0.43	0.33	0.42	0.17	0.43	0.33	0.64	0.0
-	-	ENSOCUG00000021716	DHRS4	Allele Expression Prediction	L	M	M	M	M	M	M	M	M	H
-	-			Log2FC(relative to father)	-1.4	-1.1	-0.9	-1.2	-1.1	-0.8	-1.3	-1.1	-1.0	0
CM023788.1	66043273			allele_counts(REF|ALT)	0|75	65|30	79|40	64|47	72|55	84|47	62|44	59|45	71|50	54|0
CM023788.1	66043273			Refernce_Allele_Ratio	0.0	0.68	0.66	0.58	0.57	0.64	0.58	0.57	0.59	1.0
CM023788.1	66043291			allele_counts(REF|ALT)	77|0	38|71	59|95	45|66	62|83	55|106	47|73	58|69	57|88	0|230
CM023788.1	66043291			Refernce_Allele_Ratio	1.0	0.35	0.38	0.41	0.43	0.34	0.39	0.46	0.39	0.0
-	-	ENSOCUG00000016171	CDH23	Allele Expression Prediction	L	M	M	M	M	M	M	M	M	H
-	-			Log2FC(relative to father)	-1.1	-0.2	-0.8	-0.5	-0.3	-0.3	-0.0	-0.4	-0.4	0
CM023789.1	24891491			allele_counts(REF|ALT)	0|2	1|6	4|3	3|2	2|3	3|6	6|4	5|2	3|9	8|0
CM023789.1	24891491			Refernce_Allele_Ratio	0.0	0.14	0.57	0.6	0.4	0.33	0.6	0.71	0.25	1.0
-	-	ENSOCUG00000013992	TSPAN15	Allele Expression Prediction	L	M	M	M	M	M	M	M	M	H
-	-			Log2FC(relative to father)	-1.5	0.1	0.1	-0.1	0.1	-0.2	-0.1	-0.1	0.0	0
CM023789.1	26645358			allele_counts(REF|ALT)	3|49	57|47	68|50	59|26	79|26	58|48	81|20	60|41	93|33	47|0
CM023789.1	26645358			Refernce_Allele_Ratio	0.06	0.55	0.58	0.69	0.75	0.55	0.8	0.59	0.74	1.0
-	-	ENSOCUG00000014973	GALK1	Allele Expression Prediction	L	M	M	M	M	M	M	M	M	H
-	-			Log2FC(relative to father)	-1.2	-1.0	-0.8	-0.8	-1.1	-0.6	-0.8	-1.0	-0.6	0
CM023790.1	59222739			allele_counts(REF|ALT)	0|48	16|13	21|20	19|19	18|10	18|34	25|6	20|12	24|24	49|0
CM023790.1	59222739			Refernce_Allele_Ratio	0.0	0.55	0.51	0.5	0.64	0.35	0.81	0.62	0.5	1.0

## Sheet: H_M_Only_AD_LOG
CHROM	POS	ENSEMBL ID	Gene name	source	mother	child_1	child_2	child_3	child_4	child_5	child_6	child_7	child_8	father
-	-	ENSOCUG00000016960	ENSOCUG00000016960	Allele Expression Prediction	M	M	H	H	H	M	H	M	H	H
-	-			Log2FC(relative to father)	0.9	1.2	0.6	0.6	0.7	1.2	0.0	1.6	0.7	0
CM023773.1	115380181			allele_counts(REF|ALT)	14|3	16|6	0|11	0|17	0|10	23|7	0|8	9|5	0|6	0|8
CM023773.1	115380181			Refernce_Allele_Ratio	0.82	0.73	0.0	0.0	0.0	0.77	0.0	0.64	0.0	0.0
CM023773.1	115380291			allele_counts(REF|ALT)	60|7	62|17	0|56	0|46	0|47	100|15	0|34	58|29	0|46	0|28
CM023773.1	115380291			Refernce_Allele_Ratio	0.9	0.78	0.0	0.0	0.0	0.87	0.0	0.67	0.0	0.0
CM023773.1	115381921			allele_counts(REF|ALT)	18|9	48|17	0|53	0|45	0|59	44|19	0|31	64|44	0|67	0|28
CM023773.1	115381921			Refernce_Allele_Ratio	0.67	0.74	0.0	0.0	0.0	0.7	0.0	0.59	0.0	0.0
CM023773.1	115381937			allele_counts(REF|ALT)	17|9	46|17	0|56	0|44	0|55	39|22	0|32	66|44	0|67	0|27
CM023773.1	115381937			Refernce_Allele_Ratio	0.65	0.73	0.0	0.0	0.0	0.64	0.0	0.6	0.0	0.0
-	-	ENSOCUG00000007943	RARRES2	Allele Expression Prediction	M	M	H	H	M	M	H	H	M	H
-	-			Log2FC(relative to father)	0.8	1.4	0.4	-0.1	1.2	1.2	0.2	0.3	1.6	0
CM023784.1	142198826			allele_counts(REF|ALT)	172|60	228|100	0|207	0|167	285|107	227|101	1|168	0|214	322|102	0|161
CM023784.1	142198826			Refernce_Allele_Ratio	0.74	0.7	0.0	0.0	0.73	0.69	0.01	0.0	0.76	0.0
CM023784.1	142200807			allele_counts(REF|ALT)	219|645	320|867	231|0	190|0	292|846	292|841	198|0	175|0	323|968	168|0
CM023784.1	142200807			Refernce_Allele_Ratio	0.25	0.27	1.0	1.0	0.26	0.26	1.0	1.0	0.25	1.0
CM023784.1	142200822			allele_counts(REF|ALT)	204|602	302|760	231|0	190|0	266|766	264|783	198|0	175|0	313|905	168|0
CM023784.1	142200822			Refernce_Allele_Ratio	0.25	0.28	1.0	1.0	0.26	0.25	1.0	1.0	0.26	1.0
CM023784.1	142201754			allele_counts(REF|ALT)	40|8	28|6	0|36	0|27	34|11	35|7	0|41	1|29	44|9	0|26
CM023784.1	142201754			Refernce_Allele_Ratio	0.83	0.82	0.0	0.0	0.76	0.83	0.0	0.03	0.83	0.0
-	-	ENSOCUG00000012338	DDX3X	Allele Expression Prediction	M	M	M	M	H	H	H	H	H	H
-	-			Log2FC(relative to father)	1.1	0.8	0.8	1.1	0.7	0.2	0.5	0.4	0.5	0
CM023793.1	28078728			allele_counts(REF|ALT)	71|0	33|0	73|0	40|0	601|87	503|92	514|82	569|92	559|90	336|88
CM023793.1	28078728			Refernce_Allele_Ratio	1.0	1.0	1.0	1.0	0.87	0.85	0.86	0.86	0.86	0.79
CM023793.1	28079120			allele_counts(REF|ALT)	61|0	52|0	55|0	52|0	156|36	142|38	127|33	133|37	137|35	122|42
CM023793.1	28079120			Refernce_Allele_Ratio	1.0	1.0	1.0	1.0	0.81	0.79	0.79	0.78	0.8	0.74

## Sheet: L_M_Only_AD_LOG
CHROM	POS	ENSEMBL ID	Gene name	source	mother	child_1	child_2	child_3	child_4	child_5	child_6	child_7	child_8	father
-	-	ENSOCUG00000012720	TRIM58	Allele Expression Prediction	L	L	L	M	L	L	L	L	L	M
-	-			Log2FC(relative to father)	-0.8	-1.1	-2.6	-0.4	-1.1	-1.8	-1.2	-1.5	-1.2	0
CM023774.1	167606003			allele_counts(REF|ALT)	3|0	5|0	1|0	2|2	3|0	6|0	7|0	1|0	4|0	6|2
CM023774.1	167606003			Refernce_Allele_Ratio	1.0	1.0	1.0	0.5	1.0	1.0	1.0	1.0	1.0	0.75
-	-	ENSOCUG00000004099	GDAP1L1	Allele Expression Prediction	L	L	M	M	L	M	M	L	L	M
-	-			Log2FC(relative to father)	-1.0	-1.3	-0.1	-0.7	-0.8	0.1	0.5	-1.0	-1.2	0
CM023775.1	15774871			allele_counts(REF|ALT)	0|17	0|10	6|4	8|4	0|11	6|7	9|7	0|6	0|7	6|5
CM023775.1	15774871			Refernce_Allele_Ratio	0.0	0.0	0.6	0.67	0.0	0.46	0.56	0.0	0.0	0.55
CM023775.1	15790850			allele_counts(REF|ALT)	15|0	8|0	5|11	4|9	10|0	4|12	5|11	21|0	7|0	6|5
CM023775.1	15790850			Refernce_Allele_Ratio	1.0	1.0	0.31	0.31	1.0	0.25	0.31	1.0	1.0	0.55
-	-	ENSOCUG00000027493	APMAP	Allele Expression Prediction	L	L	M	M	L	M	M	L	L	M
-	-			Log2FC(relative to father)	-1.1	-1.1	-0.4	-0.4	-0.9	-0.4	-0.7	-1.2	-1.2	0
CM023775.1	50805561			allele_counts(REF|ALT)	0|31	0|17	17|11	21|4	0|18	24|10	21|9	0|27	0|29	22|10
CM023775.1	50805561			Refernce_Allele_Ratio	0.0	0.0	0.61	0.84	0.0	0.71	0.7	0.0	0.0	0.69
CM023775.1	50793311			allele_counts(REF|ALT)	30|0	34|0	23|45	14|38	33|0	18|48	17|32	36|0	33|0	16|57
CM023775.1	50793311			Refernce_Allele_Ratio	1.0	1.0	0.34	0.27	1.0	0.27	0.35	1.0	1.0	0.22
CM023775.1	50793487			allele_counts(REF|ALT)	62|0	56|0	30|81	25|75	73|0	47|108	25|66	62|0	56|0	60|104
CM023775.1	50793487			Refernce_Allele_Ratio	1.0	1.0	0.27	0.25	1.0	0.3	0.27	1.0	1.0	0.37
CM023775.1	50793753			allele_counts(REF|ALT)	0|97	0|97	108|48	138|36	0|89	129|58	86|43	0|69	0|70	119|60
CM023775.1	50793753			Refernce_Allele_Ratio	0.0	0.0	0.69	0.79	0.0	0.69	0.67	0.0	0.0	0.66
CM023775.1	50794224			allele_counts(REF|ALT)	0|51	0|35	59|26	68|25	0|66	66|15	37|24	0|42	0|33	65|38
CM023775.1	50794224			Refernce_Allele_Ratio	0.0	0.0	0.69	0.73	0.0	0.81	0.61	0.0	0.0	0.63
CM023775.1	50794426			allele_counts(REF|ALT)	0|71	0|55	84|25	76|37	0|79	61|25	53|21	0|63	0|58	72|40
CM023775.1	50794426			Refernce_Allele_Ratio	0.0	0.0	0.77	0.67	0.0	0.71	0.72	0.0	0.0	0.64
-	-	ENSOCUG00000017455	ASB8	Allele Expression Prediction	L	M	M	L	M	L	M	M	L	M
-	-			Log2FC(relative to father)	-0.9	-0.4	-0.6	-1.1	-0.6	-1.2	-0.6	-0.6	-1.3	0
CM023779.1	140262765			allele_counts(REF|ALT)	748|0	409|860	378|791	641|0	436|955	646|0	339|818	393|864	676|0	485|1092
CM023779.1	140262765			Refernce_Allele_Ratio	1.0	0.32	0.32	1.0	0.31	1.0	0.29	0.31	1.0	0.31
CM023779.1	140263529			allele_counts(REF|ALT)	2|885	931|330	841|298	0|772	998|406	3|764	914|329	853|314	2|779	1224|486
CM023779.1	140263529			Refernce_Allele_Ratio	0.0	0.74	0.74	0.0	0.71	0.0	0.74	0.73	0.0	0.72
-	-	ENSOCUG00000013456	OMA1	Allele Expression Prediction	L	L	L	M	L	L	L	L	M	M
-	-			Log2FC(relative to father)	-1.1	-1.5	-1.4	-0.4	-1.2	-1.3	-1.5	-1.2	-0.6	0
CM023784.1	51347594			allele_counts(REF|ALT)	18|0	11|0	10|0	7|14	14|0	21|0	11|0	19|0	12|16	5|14
CM023784.1	51347594			Refernce_Allele_Ratio	1.0	1.0	1.0	0.33	1.0	1.0	1.0	1.0	0.43	0.26
CM023784.1	51386401			allele_counts(REF|ALT)	0|21	0|13	0|15	25|10	0|31	0|25	0|17	0|23	28|12	40|9
CM023784.1	51386401			Refernce_Allele_Ratio	0.0	0.0	0.0	0.71	0.0	0.0	0.0	0.0	0.7	0.82
CM023784.1	51386460			allele_counts(REF|ALT)	18|0	13|0	20|0	11|19	29|0	22|0	20|0	21|0	12|20	12|43
CM023784.1	51386460			Refernce_Allele_Ratio	1.0	1.0	1.0	0.37	1.0	1.0	1.0	1.0	0.38	0.22
CM023784.1	51386461			allele_counts(REF|ALT)	18|0	13|0	20|0	11|19	29|0	22|0	20|0	21|0	12|20	12|43
CM023784.1	51386461			Refernce_Allele_Ratio	1.0	1.0	1.0	0.37	1.0	1.0	1.0	1.0	0.38	0.22
CM023784.1	51386611			allele_counts(REF|ALT)	0|18	0|17	0|28	26|11	0|15	0|14	0|13	0|12	29|5	37|10
CM023784.1	51386611			Refernce_Allele_Ratio	0.0	0.0	0.0	0.7	0.0	0.0	0.0	0.0	0.85	0.79
CM023784.1	51386714			allele_counts(REF|ALT)	0|19	0|23	0|12	23|12	0|14	0|12	0|18	0|10	20|5	46|7
CM023784.1	51386714			Refernce_Allele_Ratio	0.0	0.0	0.0	0.66	0.0	0.0	0.0	0.0	0.8	0.87
CM023784.1	51386777			allele_counts(REF|ALT)	0|14	0|17	0|5	12|5	0|7	0|9	0|11	0|6	11|3	29|6
CM023784.1	51386777			Refernce_Allele_Ratio	0.0	0.0	0.0	0.71	0.0	0.0	0.0	0.0	0.79	0.83
CM023784.1	51386787			allele_counts(REF|ALT)	0|14	0|16	0|3	10|5	0|7	0|9	0|11	0|5	11|2	27|6
CM023784.1	51386787			Refernce_Allele_Ratio	0.0	0.0	0.0	0.67	0.0	0.0	0.0	0.0	0.85	0.82
-	-	ENSOCUG00000000694	BDH2	Allele Expression Prediction	L	L	L	M	M	L	M	L	L	M
-	-			Log2FC(relative to father)	-1.2	-1.4	-1.5	-0.5	-0.5	-1.4	-0.1	-1.1	-1.4	0
CM023786.1	58217250			allele_counts(REF|ALT)	154|0	199|0	161|0	80|219	79|279	161|0	105|281	155|0	200|0	106|299
CM023786.1	58217250			Refernce_Allele_Ratio	1.0	1.0	1.0	0.27	0.22	1.0	0.27	1.0	1.0	0.26
-	-	ENSOCUG00000029357	ENSOCUG00000029357	Allele Expression Prediction	L	L	L	M	M	L	M	L	L	M
-	-			Log2FC(relative to father)	-2.7	-2.9	-3.1	-0.3	-0.2	-2.5	-0.1	-2.8	-2.9	0
CM023786.1	64171465			allele_counts(REF|ALT)	0|60	0|55	0|45	79|16	93|21	0|49	75|21	0|61	0|68	126|36
CM023786.1	64171465			Refernce_Allele_Ratio	0.0	0.0	0.0	0.83	0.82	0.0	0.78	0.0	0.0	0.78
-	-	ENSOCUG00000002151	SDR39U1	Allele Expression Prediction	M	M	L	L	M	L	M	M	L	L
-	-			Log2FC(relative to father)	-0.8	-0.9	-0.6	-0.7	-1.1	-0.2	-1.0	-1.1	-0.4	0
CM023788.1	66454069			allele_counts(REF|ALT)	67|155	62|150	0|309	0|274	60|171	0|363	51|152	57|180	0|294	0|343
CM023788.1	66454069			Refernce_Allele_Ratio	0.3	0.29	0.0	0.0	0.26	0.0	0.25	0.24	0.0	0.0

## Sheet: M_M_Only_AD_LOG
CHROM	POS	ENSEMBL ID	Gene name	source	mother	child_1	child_2	child_3	child_4	child_5	child_6	child_7	child_8	father
-	-	ENSOCUG00000025228	ENSOCUG00000025228	Allele Expression Prediction	M	M	M	L	M	M	M	M	L	M
-	-			Log2FC(relative to father)	-0.2	-0.2	-0.4	-1.7	-0.2	-0.5	-0.6	-0.3	-1.4	0
CM023772.1	105985841			allele_counts(REF|ALT)	67|14	57|14	60|18	2|36	52|25	61|10	48|7	78|20	0|63	46|28
CM023772.1	105985841			Refernce_Allele_Ratio	0.83	0.8	0.77	0.05	0.68	0.86	0.87	0.8	0.0	0.62
CM023772.1	105988378			allele_counts(REF|ALT)	23|33	33|34	28|26	52|0	53|27	34|36	11|35	45|39	68|0	44|29
CM023772.1	105988378			Refernce_Allele_Ratio	0.41	0.49	0.52	1.0	0.66	0.49	0.24	0.54	1.0	0.6
CM023772.1	105989245			allele_counts(REF|ALT)	42|62	52|79	57|80	49|0	60|75	43|78	23|65	52|75	51|0	50|75
CM023772.1	105989245			Refernce_Allele_Ratio	0.4	0.4	0.42	1.0	0.44	0.36	0.26	0.41	1.0	0.4
