# Supplementary material for: Family-based Analysis of Allele-Specific Expression Reveals Mostly Simple, Intermediate-type of Inheritance
Source: Research Square preprint supplement (doi:10.21203/rs.3.rs-6515696/v1), 2025-06-05
Supplement: Supplementary file 10 [file e72050fdc371b8a879ba0112.xlsx]

## Sheet: H_L
gene_id	gene_name	DNA_EXON_complete	DNA_EXON_matched	DNA_INTRON_complete	DNA_INTRON_matched	DNA_Outside_complete	DNA_Outside_matched	RNA_Var_complete	RNA_Var_mathced
ENSOCUG00000026479	SERPING1	-	-	4	-	4	-	-	-
ENSOCUG00000000098	SLC16A10	3	-	957	-	173	-	2	-
ENSOCUG00000000148	CDO1	1	-	132	55	323	7	-	-
ENSOCUG00000000302	ENSOCUG00000000302	1	-	8	-	216	-	-	-
ENSOCUG00000000485	NAF1	19	-	553	-	418	-	16	-
ENSOCUG00000000716	EPSTI1	5	-	518	3	68	19	3	-
ENSOCUG00000000725	MC5R	9	9	-	-	331	318	-	-
ENSOCUG00000001131	CEMIP2	13	-	641	1	138	-	9	-
ENSOCUG00000001428	PDE4A	11	11	17	13	193	172	12	11
ENSOCUG00000001519	RTN4RL1	2	-	262	-	107	-	2	-
ENSOCUG00000002662	ENSOCUG00000002662	7	-	479	-	46	-	-	-
ENSOCUG00000002754	ABCC3	13	13	272	265	130	114	-	-
ENSOCUG00000003048	TPPP	-	-	3	-	156	-	-	-
ENSOCUG00000003314	MPP3	11	10	219	215	281	262	-	-
ENSOCUG00000004501	ENSOCUG00000004501	1	-	19	-	58	8	2	-
ENSOCUG00000004534	MDN1	84	-	2102	22	270	21	32	-
ENSOCUG00000004580	POLA2	32	2	473	-	571	67	19	-
ENSOCUG00000004682	RAB15	13	-	212	-	312	-	5	-
ENSOCUG00000004855	XYLT1	23	-	463	-	98	-	23	-
ENSOCUG00000005174	DPT	26	-	241	1	203	-	8	-
ENSOCUG00000005330	ACADSB	3	3	262	253	18	9	1	1
ENSOCUG00000005343	TTC5	3	-	228	-	182	-	1	-
ENSOCUG00000005614	TTC9	-	-	119	-	136	-	-	-
ENSOCUG00000006382	ZCCHC24	1	-	680	118	330	161	1	-
ENSOCUG00000007027	TSSK1B	11	-	6	-	360	91	-	-
ENSOCUG00000007492	LMOD1	54	-	216	-	126	-	48	-
ENSOCUG00000007765	PSAT1	13	-	280	-	77	-	-	-
ENSOCUG00000008001	SLC38A5	-	-	1	-	4	-	-	-
ENSOCUG00000009088	ENSOCUG00000009088	4	2	33	32	186	168	3	1
ENSOCUG00000009095	COMTD1	-	-	-	-	11	-	-	-
ENSOCUG00000009172	IRX2	3	-	3	-	236	-	-	-
ENSOCUG00000009379	MIS18A	11	-	121	-	484	-	-	-
ENSOCUG00000009473	PANX1	34	4	694	177	444	18	24	3
ENSOCUG00000009547	MYO5B	32	14	2358	1554	258	196	27	10
ENSOCUG00000009676	ENSOCUG00000009676	-	-	-	-	32	7	-	-
ENSOCUG00000009962	OTOP2	37	-	126	2	227	-	-	-
ENSOCUG00000010531	KCTD15	15	-	72	-	160	-	13	-
ENSOCUG00000010546	ENSOCUG00000010546	6	6	24	22	196	181	-	-
ENSOCUG00000010747	ZNF385A	1	-	105	-	166	-	1	-
ENSOCUG00000010891	ENSOCUG00000010891	1	-	200	92	112	-	1	-
ENSOCUG00000011085	CTSS	2	2	166	142	60	22	2	2
ENSOCUG00000011452	ENSOCUG00000011452	27	-	339	-	150	1	25	-
ENSOCUG00000012115	AXIN2	11	3	323	27	375	127	10	4
ENSOCUG00000012326	IL18BP	-	-	-	-	3	-	-	-
ENSOCUG00000013194	PPARG	1	-	268	1	10	-	1	-
ENSOCUG00000013675	FGL2	11	-	15	-	327	-	10	-
ENSOCUG00000013715	C5orf34	15	-	252	-	182	-	5	-
ENSOCUG00000013971	AOX1	34	5	908	192	151	9	15	3
ENSOCUG00000014237	GK5	2	1	1440	1347	290	146	1	1
ENSOCUG00000014468	C1S	17	-	76	-	338	-	17	-
ENSOCUG00000014480	C1R	48	-	623	-	384	-	36	-
ENSOCUG00000015331	GPRC5D	8	6	74	54	132	86	-	-
ENSOCUG00000015502	GPR83	13	11	112	86	166	105	-	-
ENSOCUG00000015957	MYOC	9	1	8	-	160	3	9	1
ENSOCUG00000016591	GFPT2	-	-	12	-	2	-	-	-
ENSOCUG00000016709	PDRG1	11	5	173	78	485	189	11	5
ENSOCUG00000017890	MDGA1	29	24	621	593	266	149	27	22
ENSOCUG00000017896	TTC26	11	11	491	435	97	85	1	1
ENSOCUG00000021375	ENSOCUG00000021375	-	-	-	-	1	-	2	-
ENSOCUG00000021477	ENSOCUG00000021477	-	-	-	-	141	-	4	1
ENSOCUG00000021629	RASIP1	4	4	91	89	61	59	3	3
ENSOCUG00000021647	ENSOCUG00000021647	1	-	16	-	216	-	11	1
ENSOCUG00000021704	PLEKHH3	12	12	43	41	147	136	11	11
ENSOCUG00000022309	ENSOCUG00000022309	40	-	61	-	262	-	24	-
ENSOCUG00000022352	ENSOCUG00000022352	12	-	6	-	102	88	2	-
ENSOCUG00000022364	ENSOCUG00000022364	-	-	4	-	110	-	1	-
ENSOCUG00000022413	ENSOCUG00000022413	18	17	67	58	180	143	7	7
ENSOCUG00000023058	IGSF8	10	10	32	32	192	189	10	10
ENSOCUG00000023236	TTLL4	53	-	277	-	353	31	44	-
ENSOCUG00000023448	GSTM2	5	-	392	126	33	1	5	2
ENSOCUG00000024266	PLEKHH2	21	4	1090	417	99	15	16	2
ENSOCUG00000024282	PLEKHB2	-	-	-	-	37	35	-	-
ENSOCUG00000024443	ENSOCUG00000024443	9	2	108	77	94	75	16	-
ENSOCUG00000024734	ENSOCUG00000024734	23	8	239	86	152	37	5	2
ENSOCUG00000024825	LRFN1	6	-	51	5	63	5	-	-
ENSOCUG00000025023	ENSOCUG00000025023	1	-	-	-	6	-	15	7
ENSOCUG00000025077	ARID3B	15	11	98	85	174	127	14	10
ENSOCUG00000025655	GPR161	53	49	533	510	235	222	-	-
ENSOCUG00000025692	SLC5A3	4	2	267	263	133	129	3	3
ENSOCUG00000025816	ENSOCUG00000025816	3	3	6	5	179	172	-	-
ENSOCUG00000025840	RENBP	-	-	37	-	1	-	-	-
ENSOCUG00000025924	NXT1	3	-	-	-	269	-	3	-
ENSOCUG00000026479	SERPING1
ENSOCUG00000026517	RAI2	-	-	9	-	2	-	-	-
ENSOCUG00000027406	ENSOCUG00000027406	3	-	8	-	275	-	1	1
ENSOCUG00000027585	BCL9L	38	-	103	-	89	-	35	-
ENSOCUG00000027792	TMEM52	1	-	1	1	45	5	1	-
ENSOCUG00000027981	ISG15	13	1	97	-	81	-	5	-
ENSOCUG00000029019	ENSOCUG00000029019	-	-	-	-	205	-	-	-
ENSOCUG00000029474	ENSOCUG00000029474	20	3	284	16	119	40	3	-
ENSOCUG00000029818	ENSOCUG00000029818	17	-	-	-	255	-	-	-
ENSOCUG00000029866	ENSOCUG00000029866	21	-	80	-	320	-	1	-
ENSOCUG00000030212	ENSOCUG00000030212	28	-	778	28	223	16	4	-
ENSOCUG00000031036	ENSOCUG00000031036	-	-	-	-	196	-	2	-
ENSOCUG00000032475	MRLN	4	-	173	-	307	38	-	-
ENSOCUG00000032659	ENSOCUG00000032659	108	-	591	-	223	-	-	-
ENSOCUG00000034684	SCO2	5	3	-	-	193	146	3	2
ENSOCUG00000036188	ZNF550	8	-	51	-	80	-	2	-

## Sheet: L_H
gene_id	gene_name	DNA_EXON_complete	DNA_EXON_matched	DNA_INTRON_complete	DNA_INTRON_matched	DNA_Outside_complete	DNA_Outside_matched	RNA_Var_complete	RNA_Var_mathced
ENSOCUG00000000107	MPPE1	25	4	443	122	391	89	20	3
ENSOCUG00000000515	LGALS4	-	-	7	4	168	132	-	-
ENSOCUG00000000724	SLC7A7	4	-	327	-	210	-	-	-
ENSOCUG00000000984	ESRRG	3	1	3639	1146	81	20	-	-
ENSOCUG00000001179	ARHGEF26	4	-	353	-	101	-	3	-
ENSOCUG00000001816	PLCE1	17	4	2444	589	97	-	-	-
ENSOCUG00000001956	C12orf4	3	1	202	138	32	3	5	1
ENSOCUG00000002119	ENSOCUG00000002119	18	13	841	455	262	13	11	11
ENSOCUG00000002342	VSIG8	21	21	201	199	250	237	-	-
ENSOCUG00000002556	BAK1	7	7	68	64	89	81	6	6
ENSOCUG00000002929	CATSPER4	1	-	69	-	36	-	-	-
ENSOCUG00000003200	VGLL2	1	-	12	-	11	-	1	-
ENSOCUG00000003388	SCARB2	28	28	687	645	172	167	17	17
ENSOCUG00000003871	ENSOCUG00000003871	8	2	314	116	350	248	8	5
ENSOCUG00000004103	IRAK4	16	-	265	4	280	8	14	-
ENSOCUG00000004122	NIPSNAP1	17	1	291	11	254	84	7	-
ENSOCUG00000004155	ACOX2	1	-	9	-	31	-	-	-
ENSOCUG00000004260	TTPAL	19	10	308	93	218	112	8	-
ENSOCUG00000004263	ADH5	13	13	204	197	285	276	4	4
ENSOCUG00000004821	MLLT11	1	-	-	-	191	78	1	-
ENSOCUG00000005172	ZSCAN30	12	-	80	-	128	-	7	-
ENSOCUG00000005617	ENSOCUG00000005617	7	3	130	46	298	131	1	-
ENSOCUG00000005855	ASPA	2	-	91	-	114	-	2	-
ENSOCUG00000006333	ENSOCUG00000006333	-	-	-	-	-	-	-	-
ENSOCUG00000006508	PDE4B	-	-	123	-	4	-	-	-
ENSOCUG00000006678	JAM2	5	-	1064	8	296	77	5	-
ENSOCUG00000006941	PMM1	5	4	86	82	187	175	-	-
ENSOCUG00000007631	GPM6A	11	8	2378	845	209	23	5	5
ENSOCUG00000007867	PUS10	1	-	382	350	103	88	-	-
ENSOCUG00000007893	GPAM	22	-	265	-	248	-	12	-
ENSOCUG00000008316	STRIP2	9	4	732	128	156	1	9	4
ENSOCUG00000008329	ADAMTS19	-	-	153	2	59	-	-	-
ENSOCUG00000008702	GSTO1	1	-	6	-	133	-	1	-
ENSOCUG00000008769	PCDHAC2	58	-	2274	-	141	17	-	-
ENSOCUG00000008954	GADD45A	-	-	-	-	4	-	-	-
ENSOCUG00000009052	EYA1	11	-	2977	282	109	1	10	-
ENSOCUG00000009100	ANKRD23	24	21	60	41	154	116	23	20
ENSOCUG00000009330	FMO5	28	-	235	2	235	21	1	-
ENSOCUG00000009405	ENSOCUG00000009405	5	-	1	-	10	-	1	-
ENSOCUG00000009512	PLA1A	4	-	60	-	20	-	1	-
ENSOCUG00000009559	SANBR	4	4	416	391	146	129	1	-
ENSOCUG00000009724	FAIM	5	5	146	137	177	168	1	1
ENSOCUG00000010056	CYP1A2	11	-	35	-	196	4	10	-
ENSOCUG00000010063	LRRC49	12	5	1785	91	168	1	6	1
ENSOCUG00000010229	MYH8	27	-	100	-	261	-	59	-
ENSOCUG00000010425	FABP5	3	-	30	-	159	-	4	-
ENSOCUG00000010456	RASGEF1B	19	15	3824	2161	124	107	12	8
ENSOCUG00000010550	B3GALT4	20	18	3	3	198	177	1	1
ENSOCUG00000010755	PLCB4	-	-	55	-	5	-	-	-
ENSOCUG00000010818	NEPRO	13	13	239	223	125	118	3	3
ENSOCUG00000011456	ENSOCUG00000011456	12	12	630	596	142	138	-	-
ENSOCUG00000011677	NSUN3	2	2	170	143	84	76	-	-
ENSOCUG00000011858	TPD52L1	3	-	710	13	316	102	3	-
ENSOCUG00000012330	WARS2	9	-	819	-	82	-	6	-
ENSOCUG00000012564	EIF3K	5	5	326	290	15	12	5	4
ENSOCUG00000012571	COA4	4	4	-	-	285	237	3	3
ENSOCUG00000013088	HAUS4	5	-	91	-	208	-	3	-
ENSOCUG00000013103	COX7A1	1	1	18	14	245	220	1	1
ENSOCUG00000013324	HCRT	10	9	17	16	132	130	-	-
ENSOCUG00000013968	ENSOCUG00000013968	-	-	-	-	20	-	-	-
ENSOCUG00000013987	FGF1	-	-	9	-	1	-	-	-
ENSOCUG00000013992	TSPAN15	3	1	674	209	313	72	4	1
ENSOCUG00000014205	AKAP6	-	-	2326	33	113	-	-	-
ENSOCUG00000014668	PPARGC1A	23	-	896	141	44	-	6	-
ENSOCUG00000014817	ENSOCUG00000014817	2	-	18	-	123	-	-	-
ENSOCUG00000014850	ITGB6	17	-	42	-	192	-	-	-
ENSOCUG00000014973	GALK1	13	4	28	5	241	72	10	1
ENSOCUG00000014981	ABCB1	25	-	792	-	52	-	16	-
ENSOCUG00000015382	MAB21L3	14	11	210	202	96	79	-	-
ENSOCUG00000015757	ENSOCUG00000015757	-	-	2	-	2	-	-	-
ENSOCUG00000015831	DUSP23	2	2	25	25	111	104	1	1
ENSOCUG00000016171	CDH23	100	17	4997	1545	235	102	27	2
ENSOCUG00000016518	KIAA1217	86	-	3485	-	348	-	65	-
ENSOCUG00000016756	NEK1	4	4	997	907	140	133	1	1
ENSOCUG00000016775	NFKBID	20	18	45	43	194	184	4	4
ENSOCUG00000016875	GATB	12	-	881	-	98	-	2	-
ENSOCUG00000017098	C6orf163	-	-	17	-	91	-	-	-
ENSOCUG00000017793	ENSOCUG00000017793	44	22	640	191	380	47	14	1
ENSOCUG00000017794	TULP2	4	4	58	56	139	134	1	1
ENSOCUG00000017874	STK39	7	-	2555	-	207	-	5	-
ENSOCUG00000017907	TMEM37	7	-	106	21	255	47	5	-
ENSOCUG00000021020	KDM8	47	-	248	-	384	-	11	-
ENSOCUG00000021270	PARP3	86	-	30	-	152	-	27	-
ENSOCUG00000021716	DHRS4	6	2	136	50	262	43	6	2
ENSOCUG00000021767	HYKK	39	9	387	138	319	84	5	4
ENSOCUG00000022219	BEST3	19	3	732	135	303	120	14	1
ENSOCUG00000022239	ENSOCUG00000022239	6	-	569	128	422	202	-	-
ENSOCUG00000022245	NDRG4	9	3	333	206	211	168	3	1
ENSOCUG00000022444	ENSOCUG00000022444	-	-	-	-	1	-	-	-
ENSOCUG00000022457	MSANTD4	3	3	1	1	191	180	3	2
ENSOCUG00000022657	ENSOCUG00000022657	12	-	-	-	308	-	14	11
ENSOCUG00000023110	ENSOCUG00000023110	6	6	307	297	167	78	2	2
ENSOCUG00000023822	ENSOCUG00000023822	-	-	9	1	71	13	2	1
ENSOCUG00000026591	CRPPA	13	13	3134	2974	250	213	5	5
ENSOCUG00000027409	ENSOCUG00000027409	24	-	64	-	324	24	21	-
ENSOCUG00000027493	APMAP	22	-	476	-	58	-	7	-
ENSOCUG00000027519	SORBS3	-	-	16	-	108	-	-	-
ENSOCUG00000027987	ENSOCUG00000027987	58	-	1872	-	199	-	39	-
ENSOCUG00000029014	C1orf105	4	-	229	139	64	23	2	-
ENSOCUG00000031721	HSBP1L1	4	-	32	-	136	-	-	-
ENSOCUG00000032954	INCA1	3	-	44	11	108	18	3	-
ENSOCUG00000033434	ENSOCUG00000033434	4	-	38	-	169	-	1	-
ENSOCUG00000034268	ENSOCUG00000034268	-	-	7	-	11	-	-	-
ENSOCUG00000038496	DHX40	-	-	69	52	43	38	-	-

## Sheet: M_M
gene_id	gene_name	DNA_EXON_complete	DNA_EXON_matched	DNA_INTRON_complete	DNA_INTRON_matched	DNA_Outside_complete	DNA_Outside_matched	RNA_Var_complete	RNA_Var_mathced
ENSOCUG00000000016	ENSOCUG00000000016	10	-	172	-	334	-	1	-
ENSOCUG00000000023	PKP2	3	-	39	-	15	-	3	-
ENSOCUG00000000038	CREBRF	-	-	16	-	14	-	1	-
ENSOCUG00000000080	PLEKHA2	-	-	123	-	23	-	-	-
ENSOCUG00000000090	WDR81	10	-	85	-	122	-	9	-
ENSOCUG00000000101	ENSOCUG00000000101	6	-	29	-	267	-	9	-
ENSOCUG00000000108	ARL4A	2	-	-	-	133	-	2	-
ENSOCUG00000000121	LRR1	2	-	58	-	133	-	1	-
ENSOCUG00000000145	NFIL3	-	-	-	-	110	-	-	-
ENSOCUG00000000166	LYRM7	2	-	206	-	106	1	2	-
ENSOCUG00000000171	GREM2	-	-	31	-	43	-	-	-
ENSOCUG00000000242	ASB10	22	-	160	-	204	-	14	-
ENSOCUG00000000300	MCM7	5	-	38	-	118	-	4	-
ENSOCUG00000000440	CYP7B1	8	-	2490	-	127	-	4	-
ENSOCUG00000000459	ENSOCUG00000000459	4	-	1109	-	221	-	5	-
ENSOCUG00000000476	FGF2	4	-	934	-	160	-	2	-
ENSOCUG00000000531	ENSOCUG00000000531	2	-	255	-	58	-	3	-
ENSOCUG00000000574	PLEKHH1	32	-	659	-	232	-	4	-
ENSOCUG00000000585	RRAD	12	-	4	-	246	-	7	-
ENSOCUG00000000633	ENSOCUG00000000633	5	-	902	-	266	-	5	-
ENSOCUG00000000661	CCNT2	9	-	1591	-	187	-	1	-
ENSOCUG00000000678	AOPEP	12	-	2072	-	62	-	3	-
ENSOCUG00000000754	CYP39A1	2	-	23	-	4	-	-	-
ENSOCUG00000000821	ENSOCUG00000000821	6	-	371	-	111	-	5	-
ENSOCUG00000000907	STK35	52	-	1318	-	379	-	2	-
ENSOCUG00000000915	DTX3	2	-	4	-	162	-	2	-
ENSOCUG00000001116	TMEM187	-	-	-	-	4	-	-	-
ENSOCUG00000001190	GFRA2	12	-	934	-	373	-	5	-
ENSOCUG00000001212	JUN	4	-	246	-	116	-	2	-
ENSOCUG00000001288	UBB	4	-	193	-	311	-	3	-
ENSOCUG00000001324	ATP1A1	10	-	137	-	176	-	11	-
ENSOCUG00000001334	SLC3A2	-	-	14	-	3	-	-	-
ENSOCUG00000001454	NES	30	-	28	-	169	-	30	-
ENSOCUG00000001461	PLOD2	5	-	558	-	47	-	3	-
ENSOCUG00000001481	RIPOR2	25	-	2741	-	10	-	10	-
ENSOCUG00000001499	PLEKHA4	15	-	305	-	184	-	9	-
ENSOCUG00000001524		2	-	887	-	392	-	-	-
ENSOCUG00000001716	PFKFB1	-	-	6	-	1	-	-	-
ENSOCUG00000001808	SLC12A2	4	-	1053	-	274	-	4	-
ENSOCUG00000001828	CERK	40	-	600	-	187	-	39	-
ENSOCUG00000001879	SPAG1	20	-	1319	-	171	-	6	-
ENSOCUG00000002055	ZNF827	8	-	1877	-	129	-	3	-
ENSOCUG00000002066	CSTPP1	6	-	2288	-	348	-	3	-
ENSOCUG00000002098	FCHSD1	18	-	64	-	218	-	10	-
ENSOCUG00000002132	PPP1R10	-	-	6	-	11	-	-	-
ENSOCUG00000002323	PATZ1	9	-	186	-	250	-	4	-
ENSOCUG00000002341	CAPG	17	-	1463	-	329	-	3	-
ENSOCUG00000002383	LPAR6	-	-	-	-	22	-	-	-
ENSOCUG00000002384	NPAS2	-	-	53	-	4	-	2	-
ENSOCUG00000002417	ENSOCUG00000002417	1	-	12	-	140	-	1	-
ENSOCUG00000002473	OLFML2A	16	-	327	-	49	-	15	-
ENSOCUG00000002480	ENSOCUG00000002480	22	-	118	-	148	-	4	-
ENSOCUG00000002485	HLA-DQB1	43	-	1521	-	152	-	7	-
ENSOCUG00000002663	GIGYF1	36	-	97	-	229	-	36	-
ENSOCUG00000002737	SEMA4G	-	-	3	-	82	-	-	-
ENSOCUG00000002802	ENSOCUG00000002802	14	-	641	-	201	-	7	-
ENSOCUG00000002859	ADAMTS5	24	-	499	-	186	-	10	-
ENSOCUG00000002863	IFIH1	4	-	340	-	156	-	1	-
ENSOCUG00000002893	C7orf57	-	-	3	-	8	-	-	-
ENSOCUG00000003055	ENSOCUG00000003055	5	-	612	-	150	-	5	-
ENSOCUG00000003187	REM1	15	-	99	-	308	-	12	-
ENSOCUG00000003203	TPX2	4	-	150	-	51	-	5	-
ENSOCUG00000003221	KDM7A	6	-	649	-	35	-	6	-
ENSOCUG00000003238	AQP11	4	-	316	-	194	-	-	-
ENSOCUG00000003277	NUSAP1	11	-	587	-	233	-	3	-
ENSOCUG00000003333	LIFR	-	-	21	-	2	-	-	-
ENSOCUG00000003372	ART3	12	-	251	-	172	-	12	-
ENSOCUG00000003397	IQGAP2	16	-	1012	111	86	-	1	-
ENSOCUG00000003504	SLFN13	3	-	3	-	213	-	1	-
ENSOCUG00000003599	PTPN6	9	-	58	-	204	-	2	-
ENSOCUG00000003620	CCDC88A	9	-	680	-	99	-	5	-
ENSOCUG00000003627	GPSM2	-	-	17	-	4	-	-	-
ENSOCUG00000003851	NHLRC1	3	-	-	-	448	-	1	-
ENSOCUG00000003874	ENSOCUG00000003874	9	-	9	-	78	-	4	-
ENSOCUG00000003924	ENSOCUG00000003924	56	-	107	-	361	-	12	-
ENSOCUG00000003968	ENSOCUG00000003968	7	-	413	-	276	-	-	-
ENSOCUG00000003978	SPECC1	35	-	3488	3	293	5	25	-
ENSOCUG00000003979	MANSC1	3	-	92	-	88	-	3	-
ENSOCUG00000004049	TARDBP	-	-	5	-	79	-	-	-
ENSOCUG00000004054	CCDC34	3	-	151	-	49	-	2	-
ENSOCUG00000004186	PMM2	31	-	294	-	318	-	31	-
ENSOCUG00000004218	CD14	1	-	-	-	164	-	1	-
ENSOCUG00000004231	BACH2	6	-	171	-	170	-	1	-
ENSOCUG00000004359	SERPINE2	16	-	1062	-	208	-	5	-
ENSOCUG00000004377	ENSOCUG00000004377	17	-	399	-	218	-	17	-
ENSOCUG00000004418	CREB3L1	7	-	460	-	290	-	6	-
ENSOCUG00000004447	ALPL	19	-	83	-	180	-	-	-
ENSOCUG00000004488	GMFB	42	-	268	-	456	-	16	-
ENSOCUG00000004491	CCDC73	11	-	231	-	165	-	5	-
ENSOCUG00000004543	AIFM2	6	-	68	-	269	-	5	-
ENSOCUG00000004554	ENSOCUG00000004554	13	-	163	-	303	-	9	-
ENSOCUG00000004590	ENSOCUG00000004590	-	-	21	-	182	-	-	-
ENSOCUG00000004616	MTMR11	2	-	25	-	207	-	-	-
ENSOCUG00000004656	DOK1	11	-	5	-	223	-	11	-
ENSOCUG00000004672	ENSOCUG00000004672	-	-	9	-	215	2	-	-
ENSOCUG00000004728	SHFL	6	-	7	-	349	-	5	-
ENSOCUG00000004829	ESR1	11	-	2221	-	239	-	8	-
ENSOCUG00000004879	PTGR1	35	-	494	2	114	-	27	-
ENSOCUG00000004900	PALLD	18	-	4111	-	153	-	15	-
ENSOCUG00000004988	LOXL4	9	-	127	-	205	-	3	-
ENSOCUG00000005026	ENSOCUG00000005026	4	-	611	-	60	-	2	-
ENSOCUG00000005078	STAT5B	5	-	25	-	66	-	5	-
ENSOCUG00000005137	ABCA3	13	-	190	-	23	-	9	-
ENSOCUG00000005158	ENSOCUG00000005158	3	-	41	-	97	-	3	-
ENSOCUG00000005163	MAP2	19	-	1020	-	178	-	-	-
ENSOCUG00000005233	ETV5	-	-	10	-	4	-	2	-
ENSOCUG00000005262	ENSOCUG00000005262	-	-	2	-	80	-	-	-
ENSOCUG00000005398	CCNE2	1	-	40	-	216	-	-	-
ENSOCUG00000005508	CCDC6	7	-	1613	-	297	-	5	-
ENSOCUG00000005534	ENSOCUG00000005534	2	-	4	-	88	-	-	-
ENSOCUG00000005602	P3H1	-	-	-	-	-	-	-	-
ENSOCUG00000005611	ZNF691	-	-	1	-	2	-	-	-
ENSOCUG00000005736	ENSOCUG00000005736	9	-	1170	3	165	1	6	-
ENSOCUG00000005780	HPN	33	-	338	-	455	-	14	-
ENSOCUG00000005896	INPP4B	8	-	6840	-	144	-	3	-
ENSOCUG00000005904	ENSOCUG00000005904	-	-	6	-	81	-	1	-
ENSOCUG00000005924	SLC2A1	-	-	17	-	2	-	-	-
ENSOCUG00000005940	ARNTL	8	-	484	-	209	-	4	-
ENSOCUG00000005987	POMGNT2	9	-	-	-	404	-	9	-
ENSOCUG00000005992	RALB	23	-	1047	-	269	-	13	-
ENSOCUG00000006045	EZH1	10	-	325	-	184	-	5	-
ENSOCUG00000006102	USP36	58	-	673	-	258	1	36	-
ENSOCUG00000006343	KLF9	15	-	79	-	160	-	11	-
ENSOCUG00000006463	PRKAG2	7	-	3250	-	233	-	1	-
ENSOCUG00000006490	ENSOCUG00000006490	20	-	73	-	57	-	-	-
ENSOCUG00000006505	MGA	1	-	38	-	24	-	1	-
ENSOCUG00000006521	DEPP1	10	-	-	-	258	-	10	-
ENSOCUG00000006565	FAM126A	10	-	623	-	283	-	9	-
ENSOCUG00000006691	GSDME	29	-	1295	-	330	-	2	-
ENSOCUG00000006750	HEXIM2	-	-	-	-	6	-	-	-
ENSOCUG00000006816	RAB4A	1	-	267	-	131	-	1	-
ENSOCUG00000006822	CCSAP	13	-	82	-	144	-	8	-
ENSOCUG00000007004	CEP41	3	-	144	-	236	-	2	-
ENSOCUG00000007014	SH3D19	18	-	2254	-	200	-	11	-
ENSOCUG00000007159	ENSOCUG00000007159	1	-	-	-	400	-	1	-
ENSOCUG00000007241	IPPK	1	-	185	-	234	-	1	-
ENSOCUG00000007258	STRN	3	-	413	2	86	-	1	-
ENSOCUG00000007286	COL4A4	1	-	488	-	137	-	1	-
ENSOCUG00000007323	ENSOCUG00000007323	-	-	21	-	121	-	1	-
ENSOCUG00000007333	RBBP8	14	-	665	-	145	-	3	-
ENSOCUG00000007383	CCNT1	19	-	77	-	55	-	3	-
ENSOCUG00000007488	SUSD2	22	-	42	-	156	-	12	-
ENSOCUG00000007522	PGBD2	27	-	30	-	224	-	24	-
ENSOCUG00000007526	CTH	-	-	36	-	60	-	2	-
ENSOCUG00000007558	ZNF512B	8	-	2	-	50	-	7	-
ENSOCUG00000007616	TENM3	44	-	1224	-	153	-	19	-
ENSOCUG00000007640	GNA13	-	-	11	-	151	-	-	-
ENSOCUG00000007685	ANGPTL2	11	-	1410	-	362	-	4	-
ENSOCUG00000007844	SOS1	8	-	295	-	74	-	9	-
ENSOCUG00000007885	KCNAB1	5	-	2172	2	93	-	1	-
ENSOCUG00000007907	OCIAD2	2	-	213	-	140	-	1	-
ENSOCUG00000007928	APOM	1	-	6	-	101	-	1	-
ENSOCUG00000008031	ETV4	14	-	37	-	113	-	7	-
ENSOCUG00000008052	PIK3C2B	77	-	1206	-	217	-	54	-
ENSOCUG00000008054	CYP20A1	-	-	21	-	2	-	1	-
ENSOCUG00000008068	BCHE	30	-	399	-	153	-	6	-
ENSOCUG00000008072	STX18	44	-	184	-	420	-	8	-
ENSOCUG00000008092	ACOT11	63	-	1189	-	155	-	42	-
ENSOCUG00000008102	MTSS1	16	-	2626	-	304	-	15	-
ENSOCUG00000008192	SERTAD2	-	-	-	-	36	-	-	-
ENSOCUG00000008247	ENSOCUG00000008247	3	-	149	-	55	-	2	-
ENSOCUG00000008311	ST3GAL6	-	-	9	-	3	1	-	-
ENSOCUG00000008330	ENSOCUG00000008330	13	-	206	-	178	-	1	-
ENSOCUG00000008350	ZMYM1	-	-	5	-	3	-	-	-
ENSOCUG00000008358	ENSOCUG00000008358	1	-	22	-	69	-	1	-
ENSOCUG00000008364	PTPN4	6	-	1044	-	143	-	6	-
ENSOCUG00000008388	CCNG2	2	-	1898	-	325	-	-	-
ENSOCUG00000008419	SLC25A30	22	-	1258	-	331	-	11	-
ENSOCUG00000008545	RRM2B	22	-	691	-	107	-	20	-
ENSOCUG00000008668	MVP	29	-	208	-	172	-	16	-
ENSOCUG00000008715	ENSOCUG00000008715	3	-	1	-	4	-	4	-
ENSOCUG00000008718	TMEM231	10	-	232	-	318	-	9	-
ENSOCUG00000008750	PSMD7	11	-	185	-	321	-	10	-
ENSOCUG00000008804	RC3H2	-	-	13	-	2	-	-	-
ENSOCUG00000008922	FGR	-	-	1	-	7	-	-	-
ENSOCUG00000008956	PCTP	15	-	422	-	261	-	4	-
ENSOCUG00000009070	SEMA3C	-	-	95	-	6	-	-	-
ENSOCUG00000009103	HLA-DRA	23	-	52	-	334	-	14	-
ENSOCUG00000009143	ENSOCUG00000009143	24	-	92	-	274	-	15	-
ENSOCUG00000009149	ECHDC3	5	-	201	-	204	-	4	-
ENSOCUG00000009183	ANKRD44	25	-	423	-	96	-	6	-
ENSOCUG00000009363	HES1	1	-	3	-	70	-	1	-
ENSOCUG00000009428	RAB6B	36	-	769	-	105	-	16	-
ENSOCUG00000009447	OSBPL7	25	-	117	-	342	-	18	-
ENSOCUG00000009585	SRC	2	-	92	-	80	-	-	-
ENSOCUG00000009608	SPRY2	2	-	-	-	61	-	2	-
ENSOCUG00000009634	ENSOCUG00000009634	2	-	-	-	35	-	1	-
ENSOCUG00000009700	SATB2	8	-	594	-	40	-	6	-
ENSOCUG00000009737	ARRDC4	6	-	56	-	138	-	5	-
ENSOCUG00000009755	JARID2	1	-	46	1	7	-	1	-
ENSOCUG00000009791	ZNF248	8	-	170	-	132	-	2	-
ENSOCUG00000009799	ZBTB43	-	-	-	-	76	-	-	-
ENSOCUG00000009880	DUSP14	-	-	-	-	12	-	-	-
ENSOCUG00000009914	ARHGEF40	26	-	101	-	70	-	18	-
ENSOCUG00000009918	SCARA3	-	-	4	-	5	-	-	-
ENSOCUG00000009943	SLC38A2	12	-	137	-	203	-	12	-
ENSOCUG00000009946	AP3M1	-	-	6	-	13	-	-	-
ENSOCUG00000009947	LRCH1	13	-	1352	-	270	-	4	-
ENSOCUG00000009953	SLC25A13	21	-	2964	-	351	-	15	-
ENSOCUG00000010013	NOL3	6	-	1	-	86	-	4	-
ENSOCUG00000010033	TNIP2	2	-	1	-	116	-	-	-
ENSOCUG00000010101	IRF5	19	-	64	-	339	1	11	-
ENSOCUG00000010108	RIC1	1	-	196	1	73	-	2	-
ENSOCUG00000010123	ENSOCUG00000010123	7	-	235	-	240	-	-	-
ENSOCUG00000010231	CHRNE	6	-	23	-	185	-	4	-
ENSOCUG00000010280	PGRMC1	-	-	-	-	3	-	-	-
ENSOCUG00000010324	KDM3A	14	-	552	-	345	-	14	-
ENSOCUG00000010390	TMEM67	14	-	365	-	160	-	1	-
ENSOCUG00000010521	ELK1	1	-	3	-	5	-	-	-
ENSOCUG00000010557	MANBA	26	-	2394	-	225	-	6	-
ENSOCUG00000010570	ENSOCUG00000010570	21	-	1356	-	288	-	9	-
ENSOCUG00000010624	ENSOCUG00000010624	17	-	403	-	352	-	3	-
ENSOCUG00000010633	HMOX1	15	-	62	-	346	-	9	-
ENSOCUG00000010690	FAM126B	7	-	266	-	134	-	4	-
ENSOCUG00000010719	WDR76	4	-	863	1	111	-	-	-
ENSOCUG00000010729	RASL12	32	-	202	-	297	-	27	-
ENSOCUG00000010780	LRRC8B	12	-	164	-	88	-	2	-
ENSOCUG00000010844	ARHGEF15	1	-	6	-	6	-	-	-
ENSOCUG00000010861	PEX11G	-	-	-	-	4	-	-	-
ENSOCUG00000010929	NAGPA	17	-	60	-	396	-	12	-
ENSOCUG00000011062	BTBD8	16	-	446	-	226	-	1	-
ENSOCUG00000011101		-	-	-	-	69	-	-	-
ENSOCUG00000011366	CASTOR2	16	-	187	-	534	-	6	-
ENSOCUG00000011555	PPP2R2C	1	-	266	-	87	-	-	-
ENSOCUG00000011610	VEGFA	14	-	45	-	291	-	4	-
ENSOCUG00000011630	SPICE1	-	-	8	-	7	-	-	-
ENSOCUG00000011690	SLC25A28	1	-	1	-	128	-	-	-
ENSOCUG00000011742	CA2	4	-	4	-	3	-	1	-
ENSOCUG00000011812	ING2	-	-	2	-	141	-	-	-
ENSOCUG00000011823	HILPDA	2	-	-	-	334	-	2	-
ENSOCUG00000011934	EPHX1	-	-	35	-	91	-	-	-
ENSOCUG00000011935	PPTC7	2	-	135	-	150	-	1	-
ENSOCUG00000011964	TSSK3	1	-	5	-	131	-	1	-
ENSOCUG00000012015	CSNK1G1	1	-	424	-	74	-	-	-
ENSOCUG00000012028	PIM1	3	-	13	-	154	-	3	-
ENSOCUG00000012046	SNX24	39	-	1274	-	374	-	-	-
ENSOCUG00000012093	SLC36A1	21	-	721	-	258	-	5	-
ENSOCUG00000012185	CRACD	84	-	2214	-	100	-	10	-
ENSOCUG00000012304	ENSOCUG00000012304	-	-	-	-	6	-	-	-
ENSOCUG00000012328	RNF128	-	-	14	-	5	-	-	-
ENSOCUG00000012400	PTH1R	7	-	118	-	220	-	6	-
ENSOCUG00000012411	UHMK1	10	-	230	-	298	-	8	-
ENSOCUG00000012441	PCGF6	3	-	175	-	127	-	3	-
ENSOCUG00000012473	ANKAR	14	-	662	1	272	-	-	-
ENSOCUG00000012491	OSGEPL1	4	-	282	-	224	1	4	-
ENSOCUG00000012530	NPNT	16	-	847	-	177	-	8	-
ENSOCUG00000012532	ANXA7	-	-	9	-	2	-	1	-
ENSOCUG00000012610	CDON	21	-	772	-	210	-	9	-
ENSOCUG00000012690	HSPB1	3	-	8	-	218	-	3	-
ENSOCUG00000012696	PAFAH2	2	-	220	-	228	-	1	-
ENSOCUG00000012719	HSPA12B	34	-	221	-	233	-	12	-
ENSOCUG00000012833	ENSOCUG00000012833	32	-	1831	1	156	-	-	-
ENSOCUG00000012916	P3H3	7	-	71	-	117	-	6	-
ENSOCUG00000013296	GADD45G	3	-	26	-	300	-	3	-
ENSOCUG00000013407	GPRC5C	21	-	404	-	157	-	15	-
ENSOCUG00000013429	NHSL1	-	-	55	-	1	-	-	-
ENSOCUG00000013509	SKIL	8	-	108	-	125	-	8	-
ENSOCUG00000013513	LBH	1	-	1188	-	240	-	1	-
ENSOCUG00000013517	NCKAP1L	28	-	414	-	51	-	8	-
ENSOCUG00000013527	ABHD2	-	-	54	-	4	-	-	-
ENSOCUG00000013554	CALR3	11	-	278	-	472	-	3	-
ENSOCUG00000013695	RNF19B	-	-	7	-	84	-	-	-
ENSOCUG00000013726	EFNB1	1	-	13	-	-	-	2	-
ENSOCUG00000013795	INSIG1	19	-	60	-	238	-	4	-
ENSOCUG00000013817	EXD1	7	-	517	-	151	-	6	-
ENSOCUG00000013978	PLCL1	2	-	92	-	4	-	2	-
ENSOCUG00000014016	ENSOCUG00000014016	20	-	4	-	334	-	12	-
ENSOCUG00000014019	SPIRE2	-	-	8	-	2	-	1	-
ENSOCUG00000014083	LZTS1	-	-	3	-	11	-	-	-
ENSOCUG00000014110	ENSOCUG00000014110	24	-	787	-	397	-	4	-
ENSOCUG00000014127	TNFRSF1B	25	-	471	-	437	-	19	-
ENSOCUG00000014147	ENSOCUG00000014147	-	-	78	-	177	-	-	-
ENSOCUG00000014245	METRNL	-	-	1	-	2	-	-	-
ENSOCUG00000014264	ZNF202	-	-	1	-	4	-	-	-
ENSOCUG00000014277	ABHD4	4	-	101	-	214	-	4	-
ENSOCUG00000014294	ENSOCUG00000014294	-	-	425	-	44	-	-	-
ENSOCUG00000014315	ENSOCUG00000014315	-	-	-	-	-	-	-	-
ENSOCUG00000014333	SLC25A21	5	-	168	-	53	-	-	-
ENSOCUG00000014347	SQOR	4	-	2017	-	257	-	-	-
ENSOCUG00000014352	GATM	31	-	183	-	314	-	9	-
ENSOCUG00000014367	SGK1	22	-	726	-	185	-	10	-
ENSOCUG00000014385	CPQ	4	-	999	-	45	-	4	-
ENSOCUG00000014388	ZCWPW1	-	-	9	-	62	-	1	-
ENSOCUG00000014554	ATP6V0E2	1	-	10	-	114	-	-	-
ENSOCUG00000014569	OTUD4	17	-	11	-	8	-	-	-
ENSOCUG00000014577	SYT7	2	-	133	-	77	-	2	-
ENSOCUG00000014723	ATG14	14	-	216	-	184	-	5	-
ENSOCUG00000014762	ENSOCUG00000014762	17	-	1152	-	199	-	8	-
ENSOCUG00000014777	PADI2	65	-	515	-	342	-	60	-
ENSOCUG00000014830	FAM76A	-	-	11	-	2	-	-	-
ENSOCUG00000014852	ENSOCUG00000014852	6	-	10	-	152	-	1	-
ENSOCUG00000014904	EPAS1	30	-	1031	-	147	-	28	-
ENSOCUG00000014953	SYNE3	39	-	1454	-	591	-	6	-
ENSOCUG00000015013	CCNYL1	-	-	6	-	6	-	-	-
ENSOCUG00000015077	SCLT1	4	-	2098	-	266	-	-	-
ENSOCUG00000015080	UTRN	42	-	6135	-	106	-	13	-
ENSOCUG00000015126	FRMD6	2	-	2123	1	90	-	-	-
ENSOCUG00000015140	DACT1	16	-	38	-	83	-	17	-
ENSOCUG00000015168	PLB1	29	-	1444	-	177	-	6	-
ENSOCUG00000015229	ATAD5	20	-	121	-	14	-	1	-
ENSOCUG00000015244	ENSOCUG00000015244	-	-	24	-	66	-	-	-
ENSOCUG00000015263	IFRD1	-	-	39	-	5	-	-	-
ENSOCUG00000015267	GPX8	5	-	27	-	272	-	6	-
ENSOCUG00000015377	ANGPT2	7	-	114	-	123	-	4	-
ENSOCUG00000015401	MXI1	3	-	515	-	98	-	-	-
ENSOCUG00000015409	TCP11L1	24	-	185	-	171	-	7	-
ENSOCUG00000015417	CSTF3	-	-	46	-	147	-	-	-
ENSOCUG00000015445	SQSTM1	11	-	27	-	65	-	3	-
ENSOCUG00000015463	MGAT2	3	-	-	-	222	-	3	-
ENSOCUG00000015498	EFCAB11	2	-	1660	-	359	-	1	-
ENSOCUG00000015516	HOXC4	-	-	2	-	35	-	-	-
ENSOCUG00000015595	CDK8	28	-	2005	-	103	-	-	-
ENSOCUG00000015613	TPST1	4	-	135	-	68	1	2	-
ENSOCUG00000015644	DEF6	8	-	211	-	136	-	2	-
ENSOCUG00000015685	SSX2IP	6	-	239	-	447	-	3	-
ENSOCUG00000015691	SLC2A11	13	-	36	-	227	-	7	-
ENSOCUG00000015769	RADIL	1	-	31	-	27	-	1	-
ENSOCUG00000015771	SQLE	6	-	118	-	198	-	4	-
ENSOCUG00000015799	ENSOCUG00000015799	-	-	988	-	99	-	-	-
ENSOCUG00000015864	ABLIM1	8	-	370	-	120	-	8	-
ENSOCUG00000015875	RFTN1	6	-	2383	-	21	-	-	-
ENSOCUG00000015888	FBXO31	-	-	7	-	2	-	-	-
ENSOCUG00000015904	TKT	10	-	259	-	279	-	9	-
ENSOCUG00000015909	HBEGF	3	-	42	-	202	-	3	-
ENSOCUG00000015928	WNK4	33	-	171	-	197	-	15	-
ENSOCUG00000016050	TMEM131L	27	-	2712	-	310	-	21	-
ENSOCUG00000016144	ATG13	9	-	276	-	203	-	8	-
ENSOCUG00000016259	DDIT4L	4	-	24	-	282	-	4	-
ENSOCUG00000016268	RCN1	3	-	42	-	57	-	3	-
ENSOCUG00000016328	FAM151B	3	-	207	-	48	-	6	-
ENSOCUG00000016426	AGER	5	-	10	-	107	-	3	-
ENSOCUG00000016500	ENSOCUG00000016500	10	-	558	-	181	-	3	-
ENSOCUG00000016584	PLEKHA5	5	-	2026	-	160	-	-	-
ENSOCUG00000016643	ITGB1BP2	-	-	-	-	-	-	-	-
ENSOCUG00000016703	TRERF1	19	-	2053	-	314	-	1	-
ENSOCUG00000016767	ANAPC16	3	-	51	-	154	-	3	-
ENSOCUG00000016789	DENND2C	21	-	213	-	193	-	18	-
ENSOCUG00000016806	ENSOCUG00000016806	2	-	234	-	48	-	-	-
ENSOCUG00000016906	KCNQ5	3	-	4264	-	251	-	1	-
ENSOCUG00000016984	WWC2	5	-	1065	-	72	-	5	-
ENSOCUG00000017009	ENSOCUG00000017009	22	-	428	-	359	-	-	-
ENSOCUG00000017069	CDK5RAP1	106	-	880	-	326	-	30	-
ENSOCUG00000017109	TTC39C	14	-	1366	-	230	-	2	-
ENSOCUG00000017145	B3GAT2	5	-	1626	-	197	-	2	-
ENSOCUG00000017218	SLC35B4	7	-	440	-	553	-	6	-
ENSOCUG00000017294	DNAJC30	7	-	-	-	166	-	7	-
ENSOCUG00000017368	ENSOCUG00000017368	-	-	11	-	55	-	-	-
ENSOCUG00000017379	ZNF365	6	-	209	-	62	-	2	-
ENSOCUG00000017593	CCDC71	1	-	-	-	108	-	1	-
ENSOCUG00000017626	ITGAV	25	-	1014	1	364	-	12	-
ENSOCUG00000017663	CLIP2	30	-	1044	-	321	-	17	-
ENSOCUG00000017706	ATL1	12	-	925	-	186	-	2	-
ENSOCUG00000017775	ADAMTS14	52	-	2634	-	274	-	2	-
ENSOCUG00000017805	CAPRIN2	16	-	395	-	276	-	14	-
ENSOCUG00000017838	ZFP14	-	-	2	-	1	-	-	-
ENSOCUG00000017857	BICD1	12	-	2359	-	195	-	10	-
ENSOCUG00000017864	WDR73	44	-	202	-	400	-	36	-
ENSOCUG00000020933	RDH13	29	-	13	-	156	-	19	-
ENSOCUG00000020951	ENSOCUG00000020951	-	-	2	-	171	-	-	-
ENSOCUG00000021137	SFRP5	-	-	-	-	1	-	-	-
ENSOCUG00000021304	MYL12A	30	-	622	-	274	-	2	-
ENSOCUG00000021380	SMCO1	1	-	33	-	225	-	1	-
ENSOCUG00000021395	EFR3B	4	-	1516	-	97	-	-	-
ENSOCUG00000021480	FOXS1	5	-	-	-	247	-	4	-
ENSOCUG00000021524	ALKBH2	9	-	22	-	269	-	9	-
ENSOCUG00000021573	DNASE2	-	-	7	-	89	-	3	-
ENSOCUG00000021858	RIOX1	-	-	-	-	6	-	-	-
ENSOCUG00000021938	ENSOCUG00000021938	3	-	25	-	2	-	2	-
ENSOCUG00000022118	PSPH	-	-	7	-	9	-	-	-
ENSOCUG00000022125	IL34	5	-	116	-	298	-	4	-
ENSOCUG00000022370	PAIP2B	1	-	20	-	91	-	1	-
ENSOCUG00000022820	ENSOCUG00000022820	3	-	4	-	42	1	3	-
ENSOCUG00000022823	ID3	1	-	-	-	138	-	1	-
ENSOCUG00000022843	ENSOCUG00000022843	23	-	71	-	288	-	12	-
ENSOCUG00000022883	GDPD3	5	-	34	-	147	-	1	-
ENSOCUG00000022942	ZXDC	14	-	41	-	180	-	13	-
ENSOCUG00000022945	ASNS	34	-	417	-	406	-	10	-
ENSOCUG00000023007	SEC14L5	40	-	378	-	346	-	12	-
ENSOCUG00000023112	XYLB	23	-	241	-	82	-	26	-
ENSOCUG00000023173	LIPT1	43	-	273	-	269	-	13	-
ENSOCUG00000023297	FSD1L	14	-	882	-	147	-	10	-
ENSOCUG00000023465	MOB2	7	-	96	-	144	-	2	-
ENSOCUG00000023498	TBX2	-	-	1	-	7	-	-	-
ENSOCUG00000023698	ASB12	-	-	-	-	3	-	-	-
ENSOCUG00000023795	ENSOCUG00000023795	-	-	-	-	7	-	-	-
ENSOCUG00000023933	CKAP2	10	-	234	-	103	-	17	-
ENSOCUG00000023955	ENSOCUG00000023955	22	-	3	-	85	-	2	-
ENSOCUG00000023987	ENSOCUG00000023987	14	-	70	-	340	-	14	-
ENSOCUG00000024221	INMT	23	-	34	-	300	-	22	-
ENSOCUG00000024295	TRIB1	2	-	18	-	294	-	2	-
ENSOCUG00000024362	ENSOCUG00000024362	-	-	229	-	147	-	-	-
ENSOCUG00000024434	ENSOCUG00000024434	-	-	-	-	266	-	-	-
ENSOCUG00000024640	ENSOCUG00000024640	-	-	-	-	491	-	-	-
ENSOCUG00000024679	FKBP7	2	-	124	-	185	-	2	-
ENSOCUG00000024688	DNMT3A	13	-	323	-	137	-	5	-
ENSOCUG00000024739	ZBED6	13	-	-	-	176	-	7	-
ENSOCUG00000024766	NGRN	1	-	27	-	353	-	1	-
ENSOCUG00000024814	CHRNA1	18	-	214	-	564	-	9	-
ENSOCUG00000024817	CYB5RL	6	-	179	-	272	-	4	-
ENSOCUG00000024967	ID1	-	-	-	-	208	-	-	-
ENSOCUG00000025113	MYCL	-	-	-	-	9	-	1	-
ENSOCUG00000025190	LRRC58	13	-	226	-	403	-	13	-
ENSOCUG00000025214	ENSOCUG00000025214	2	-	26	-	159	-	4	-
ENSOCUG00000025228	ENSOCUG00000025228	5	2	311	90	95	46	5	3
ENSOCUG00000025278	ARHGAP32	17	-	1669	-	95	-	13	-
ENSOCUG00000025317	PTP4A3	2	-	3	-	295	-	2	-
ENSOCUG00000025508	RELL2	-	-	5	-	216	-	-	-
ENSOCUG00000025559	ENSOCUG00000025559	-	-	-	-	44	-	-	-
ENSOCUG00000025588	ATPSCKMT	5	-	220	-	72	-	9	-
ENSOCUG00000025595	RHBDD3	10	-	47	-	155	-	9	-
ENSOCUG00000025609	MAP10	-	-	2	-	5	-	-	-
ENSOCUG00000025995	ASB2	5	-	120	-	111	-	7	-
ENSOCUG00000026111	ENSOCUG00000026111	5	-	639	-	172	-	2	-
ENSOCUG00000026120	FOLH1	9	-	655	-	223	-	7	-
ENSOCUG00000026192	RHOF	3	-	13	-	293	-	1	-
ENSOCUG00000026280	ENSOCUG00000026280	40	-	34	-	222	-	50	-
ENSOCUG00000026383	AKR1B10	20	-	139	-	256	-	16	-
ENSOCUG00000026443	UNC45B	29	-	520	-	332	-	25	-
ENSOCUG00000026686	FSD2	19	-	97	-	37	-	26	-
ENSOCUG00000026770	FJX1	3	-	1	-	179	-	4	-
ENSOCUG00000026898	AKR1C26	1	-	714	-	49	-	1	-
ENSOCUG00000026967	C1orf198	2	-	385	-	203	-	1	-
ENSOCUG00000026982	ENSOCUG00000026982	22	-	418	-	263	-	16	-
ENSOCUG00000027213	ENSOCUG00000027213	4	-	17	-	106	-	3	-
ENSOCUG00000027255	GEN1	11	-	197	-	123	-	4	-
ENSOCUG00000027275	TM4SF1	13	-	577	-	353	-	9	-
ENSOCUG00000027672	PPFIA4	19	-	1151	-	183	-	17	-
ENSOCUG00000027865	CYP11A1	31	-	45	-	224	-	13	-
ENSOCUG00000027942	ZDHHC4	40	-	24	-	206	-	6	-
ENSOCUG00000027971	SYT11	5	-	270	-	138	-	2	-
ENSOCUG00000027985	TNFRSF12A	3	-	44	-	221	-	4	-
ENSOCUG00000029127	CD164	4	-	63	-	171	-	4	-
ENSOCUG00000029159	ENSOCUG00000029159	1	-	9	-	39	-	1	-
ENSOCUG00000029166	PPDPFL	4	-	40	-	245	-	-	-
ENSOCUG00000029170	ZNF540	18	-	309	-	487	-	-	-
ENSOCUG00000029203	ZFP37	14	-	42	-	263	-	1	-
ENSOCUG00000029206	ENSOCUG00000029206	1	-	1	-	42	-	5	-
ENSOCUG00000029364	IP6K3	9	-	57	-	288	-	9	-
ENSOCUG00000029435	LCOR	9	-	540	-	48	-	1	-
ENSOCUG00000029438	ENSOCUG00000029438	14	-	4	-	318	1	9	-
ENSOCUG00000029473	ENSOCUG00000029473	41	-	66	-	376	-	16	-
ENSOCUG00000029543	ENSOCUG00000029543	9	-	35	-	71	-	11	-
ENSOCUG00000029733	ENSOCUG00000029733	1	-	1068	-	113	-	-	-
ENSOCUG00000029757	ENSOCUG00000029757	-	-	6	-	-	-	4	-
ENSOCUG00000029758	ENSOCUG00000029758	1	-	437	-	111	-	-	-
ENSOCUG00000029759	ZNF8	9	-	87	-	310	-	3	-
ENSOCUG00000030198	WDR5B	1	-	-	-	100	-	1	-
ENSOCUG00000030446	ENSOCUG00000030446	34	-	23	-	299	-	-	-
ENSOCUG00000030645	ZNF250	3	-	52	-	85	-	3	-
ENSOCUG00000030959	IDI2	9	-	35	-	410	-	-	-
ENSOCUG00000031603	ENSOCUG00000031603	-	-	-	-	89	-	-	-
ENSOCUG00000033016	ENSOCUG00000033016	2	-	60	-	149	-	1	-
ENSOCUG00000033345	ENSOCUG00000033345	1	-	5	-	5	-	-	-
ENSOCUG00000033525	ENSOCUG00000033525	-	-	20	-	2	-	-	-
ENSOCUG00000034282	ENSOCUG00000034282	3	-	603	-	65	-	-	-
ENSOCUG00000034289	ENSOCUG00000034289	15	-	126	-	170	-	6	-
ENSOCUG00000034299	ENSOCUG00000034299	2	-	-	-	27	-	-	-
ENSOCUG00000034782	OAS1	2	-	11	-	293	-	1	-
ENSOCUG00000035399	ENSOCUG00000035399	1	-	3	-	12	-	-	-
ENSOCUG00000035534	E2F6	-	-	3	-	10	-	-	-
ENSOCUG00000036167	ENSOCUG00000036167	-	-	-	-	2	-	-	-
ENSOCUG00000036297	ENSOCUG00000036297	-	-	3	-	5	-	1	-
ENSOCUG00000036648	ENSOCUG00000036648	-	-	-	-	60	-	-	-
ENSOCUG00000037192	ENSOCUG00000037192	-	-	27	2	6	1	-	-
ENSOCUG00000037527	ZNF382	6	-	-	-	182	-	-	-
ENSOCUG00000037867	ENSOCUG00000037867	25	-	41	-	232	-	4	-
ENSOCUG00000038129	STX8	6	-	5569	1	396	-	1	-
ENSOCUG00000038891	CDCA5	103	-	13	-	242	-	49	-
ENSOCUG00000039229	ENSOCUG00000039229	4	-	922	-	230	-	3	-

## Sheet: L_M or M_H
gene_id	gene_name	DNA_EXON_complete	DNA_EXON_matched	DNA_INTRON_complete	DNA_INTRON_matched	DNA_Outside_complete	DNA_Outside_matched	RNA_Var_complete	RNA_Var_mathced
ENSOCUG00000000422	ZACN	10	2	33	20	233	62	-	-
ENSOCUG00000000694	BDH2	2	1	313	176	198	20	3	1
ENSOCUG00000000832	ABHD6	4	-	327	-	193	-	1	-
ENSOCUG00000001179	ARHGEF26	4	-	353	-	101	-	3	-
ENSOCUG00000001465	PAPPA	6	-	946	-	4	-	-	-
ENSOCUG00000001842	MEIS1	-	-	22	-	2	-	-	-
ENSOCUG00000001849	SMPX	-	-	8	-	1	-	-	-
ENSOCUG00000001956	C12orf4	3	-	202	-	32	-	5	-
ENSOCUG00000002093	COQ7	12	-	137	-	343	-	7	-
ENSOCUG00000002140	DACH1	2	-	2710	1	16	-	2	-
ENSOCUG00000002151	SDR39U1	1	1	6	5	108	102	1	1
ENSOCUG00000002197	ITGB8	11	-	690	-	105	-	10	-
ENSOCUG00000002381	ENSOCUG00000002381	70	21	409	77	301	71	-	-
ENSOCUG00000002397	UBE4A	16	-	219	-	240	-	19	-
ENSOCUG00000002492	CD36	1	-	117	-	87	-	2	-
ENSOCUG00000002580	ENSOCUG00000002580	6	-	639	-	100	-	-	-
ENSOCUG00000002983	ENSOCUG00000002983	10	-	146	1	59	-	1	-
ENSOCUG00000003010	TXNIP	1	-	-	-	11	-	-	-
ENSOCUG00000003071	LPIN1	13	-	1206	-	188	-	9	-
ENSOCUG00000003200	VGLL2	1	-	12	-	11	-	1	-
ENSOCUG00000003607	AIG1	8	-	2066	-	192	-	6	-
ENSOCUG00000003809	KLF11	46	-	65	-	320	-	13	-
ENSOCUG00000003954	TMEM86A	10	-	9	-	213	-	2	-
ENSOCUG00000004099	GDAP1L1	4	4	315	308	281	267	4	3
ENSOCUG00000004372	ENSOCUG00000004372	3	-	5	-	193	-	-	-
ENSOCUG00000004378	ARRDC3	1	-	5	-	161	-	1	-
ENSOCUG00000004512	ENSOCUG00000004512	3	-	8	-	285	-	-	-
ENSOCUG00000005032	ENSOCUG00000005032	13	13	765	754	188	178	-	-
ENSOCUG00000005076	ENSOCUG00000005076	10	-	875	2	20	-	6	-
ENSOCUG00000005203	PHTF2	11	-	781	-	288	-	11	-
ENSOCUG00000005204	RGS4	35	-	863	1	104	-	4	-
ENSOCUG00000005208	ENSOCUG00000005208	1	-	4	-	10	-	-	-
ENSOCUG00000005324	MAP1A	42	-	2	-	96	-	36	-
ENSOCUG00000005345	NCEH1	43	-	661	-	71	-	10	-
ENSOCUG00000005650	FRAT1	-	-	-	-	3	-	2	-
ENSOCUG00000005767	HMGCS2	21	-	238	-	280	-	9	-
ENSOCUG00000005975	ACTR1B	37	-	345	-	370	-	9	-
ENSOCUG00000006035	ENSOCUG00000006035	44	-	1308	-	167	-	26	-
ENSOCUG00000006228	SUSD4	11	-	969	-	139	1	10	-
ENSOCUG00000006248	ENSOCUG00000006248	12	-	393	4	107	-	12	-
ENSOCUG00000006350	SLC12A4	-	-	7	-	103	-	-	-
ENSOCUG00000006678	JAM2	5	-	1064	-	296	-	5	-
ENSOCUG00000006839	PGBD5	26	-	1168	-	350	-	1	-
ENSOCUG00000006971	KATNAL2	5	-	180	-	75	-	1	-
ENSOCUG00000007516	PFKFB3	6	-	48	-	59	-	5	-
ENSOCUG00000007599	NR6A1	4	-	762	2	84	-	3	-
ENSOCUG00000007669	MYO5A	10	-	1135	-	28	-	-	-
ENSOCUG00000007887	ABCC5	7	-	296	1	115	-	7	-
ENSOCUG00000007964	TBC1D4	18	-	1607	-	195	-	18	-
ENSOCUG00000007999	DUSP1	-	-	-	-	8	-	-	-
ENSOCUG00000008515	PLA2G15	5	-	110	-	172	-	3	-
ENSOCUG00000008560	ENSOCUG00000008560	8	-	259	-	294	-	3	-
ENSOCUG00000008702	GSTO1	1	-	6	-	133	1	1	-
ENSOCUG00000009056	PDILT	3	-	348	-	217	7	-	-
ENSOCUG00000009279	ABCA1	51	-	2447	-	97	-	22	-
ENSOCUG00000009515	POPDC2	-	-	46	-	66	-	-	-
ENSOCUG00000009645	ENSOCUG00000009645	-	-	32	-	6	-	-	-
ENSOCUG00000009724	FAIM	5	-	146	-	177	-	1	-
ENSOCUG00000010214	ENSOCUG00000010214	2	-	37	-	195	-	1	-
ENSOCUG00000010654	ARHGAP24	-	-	118	-	4	-	-	-
ENSOCUG00000010706	FOSL2	7	-	197	-	184	-	5	-
ENSOCUG00000010759	LRRC38	21	-	217	-	439	-	17	-
ENSOCUG00000010948	ARMCX5	-	-	-	-	6	-	-	-
ENSOCUG00000011211	CKMT2	29	-	572	-	387	-	19	-
ENSOCUG00000011594	PLA2G2D	7	3	108	28	450	146	-	-
ENSOCUG00000011779	TNFRSF19	67	-	1204	-	246	-	55	-
ENSOCUG00000012032	ENSOCUG00000012032	16	-	191	-	363	-	3	-
ENSOCUG00000012258	PALMD	10	-	611	-	73	-	2	-
ENSOCUG00000012330	WARS2	9	-	819	11	82	-	6	-
ENSOCUG00000012720	TRIM58	14	-	53	-	126	1	3	1
ENSOCUG00000012754	RUBCN	12	-	793	-	236	-	11	-
ENSOCUG00000013088	HAUS4	5	-	91	-	208	-	3	-
ENSOCUG00000013097	C14orf93	20	-	77	-	92	-	15	-
ENSOCUG00000013313	SLC30A4	3	-	77	-	27	-	2	-
ENSOCUG00000013456	OMA1	11	11	690	660	350	337	8	8
ENSOCUG00000013603	ALAS2	-	-	3	-	1	-	-	-
ENSOCUG00000013763	DLGAP1	20	-	4213	-	84	-	3	-
ENSOCUG00000013969	BLM	34	8	1042	301	427	91	2	-
ENSOCUG00000013987	FGF1	-	-	9	-	1	-	-	-
ENSOCUG00000014089	PLD1	26	-	2011	-	214	-	9	-
ENSOCUG00000014246	SORD	4	-	482	1	268	-	4	-
ENSOCUG00000014442	H1-4	-	-	-	-	2	-	-	-
ENSOCUG00000014602	ITGB5	13	-	1700	-	345	-	13	-
ENSOCUG00000015027	TMEM266	14	-	1274	-	489	-	5	-
ENSOCUG00000015092	C4orf33	11	-	188	-	247	-	1	-
ENSOCUG00000015423	ZDHHC23	1	-	1	-	7	-	-	-
ENSOCUG00000015622	METTL7A	4	-	146	-	29	-	5	-
ENSOCUG00000016141	KLF10	6	-	23	-	217	-	6	-
ENSOCUG00000016210	REP15	15	7	-	-	480	103	1	-
ENSOCUG00000016223	ENSOCUG00000016223	13	-	171	-	335	-	12	-
ENSOCUG00000016228	MANSC4	18	5	151	17	360	42	-	-
ENSOCUG00000016464	ENSOCUG00000016464	-	-	3	-	29	-	-	-
ENSOCUG00000016478	RAD54B	12	-	553	-	264	-	3	-
ENSOCUG00000016916	CEP85	-	-	20	-	9	-	-	-
ENSOCUG00000017079	SNX29	163	-	7115	-	282	-	51	-
ENSOCUG00000017455	ASB8	4	3	14	13	84	82	7	2
ENSOCUG00000017546	ENSOCUG00000017546	-	-	3	-	91	-	-	-
ENSOCUG00000017756	C3orf33	-	-	97	-	267	-	-	-
ENSOCUG00000017835	DNMT3B	94	-	293	-	356	-	-	-
ENSOCUG00000017956	ABCC1	84	-	2086	-	464	-	80	-
ENSOCUG00000021270	PARP3	86	-	30	-	152	-	27	-
ENSOCUG00000021344	ENSOCUG00000021344	1	-	143	-	331	-	1	-
ENSOCUG00000022282	EDA2R	-	-	-	-	5	-	1	-
ENSOCUG00000022543	ENSOCUG00000022543	-	-	119	2	26	1	6	-
ENSOCUG00000022889	ENSOCUG00000022889	2	-	31	-	73	-	-	-
ENSOCUG00000022925	ENSOCUG00000022925	1	-	-	-	305	-	1	-
ENSOCUG00000023102	ENSOCUG00000023102	11	-	33	-	139	-	20	-
ENSOCUG00000023184	TAS1R1	-	-	3	-	5	-	2	-
ENSOCUG00000023408	CITED2	-	-	-	-	8	-	-	-
ENSOCUG00000023535	ENSOCUG00000023535	-	-	-	-	64	-	-	-
ENSOCUG00000023673	ENSOCUG00000023673	5	-	-	-	154	-	8	-
ENSOCUG00000023717	CNKSR1	1	-	28	-	112	-	1	-
ENSOCUG00000025663	ENSOCUG00000025663	10	-	255	-	183	-	8	-
ENSOCUG00000025890	ENSOCUG00000025890	25	-	21	-	414	-	11	-
ENSOCUG00000025982	ENSOCUG00000025982	-	-	-	-	5	-	-	-
ENSOCUG00000026398	ENSOCUG00000026398	2	-	50	1	14	-	9	-
ENSOCUG00000026751	PLBD1	4	-	596	-	88	-	2	-
ENSOCUG00000027011	ENSOCUG00000027011	-	-	2	-	5	1	4	-
ENSOCUG00000027029	ARID5B	26	-	879	-	65	-	21	-
ENSOCUG00000027381	ENSOCUG00000027381	-	-	-	-	195	-	1	-
ENSOCUG00000027409	ENSOCUG00000027409	24	-	64	-	324	-	21	-
ENSOCUG00000027493	APMAP	22	21	476	438	58	45	7	7
ENSOCUG00000029235	ENSOCUG00000029235	12	-	55	-	269	-	7	-
ENSOCUG00000029357	ENSOCUG00000029357	46	17	245	65	329	102	8	3
ENSOCUG00000029385	ENSOCUG00000029385	42	-	-	-	11	-	17	-
ENSOCUG00000029709	AKR7A3	9	-	84	-	257	-	7	-
ENSOCUG00000032372	ENSOCUG00000032372	10	-	-	-	228	-	4	-
ENSOCUG00000033152	ENSOCUG00000033152	-	-	-	-	4	-	-	-
ENSOCUG00000034665	ENSOCUG00000034665	-	-	-	-	4	-	-	-
ENSOCUG00000034762	ENSOCUG00000034762	1	-	43	-	187	4	-	-
ENSOCUG00000036082	ENSOCUG00000036082	-	-	63	-	72	-	-	-
ENSOCUG00000037340	ENSOCUG00000037340	-	-	29	-	12	-	-	-
ENSOCUG00000038615	ENSOCUG00000038615	1	-	40	-	31	-	1	-

## Sheet: H_M or M_L
gene_id	gene_name	DNA_EXON_complete	DNA_EXON_matched	DNA_INTRON_complete	DNA_INTRON_matched	DNA_Outside_complete	DNA_Outside_matched	RNA_Var_complete	RNA_Var_mathced
ENSOCUG00000000025	SLCO2A1	37	-	566	-	85	-	2	-
ENSOCUG00000000485	NAF1	19	-	553	-	418	-	16	-
ENSOCUG00000000744	PLTP	44	-	339	-	134	-	12	-
ENSOCUG00000001145	GRIP2	35	-	648	-	228	-	24	-
ENSOCUG00000001211	ENSOCUG00000001211	4	-	16	-	194	-	-	-
ENSOCUG00000001676	EZH2	-	-	20	-	49	-	-	-
ENSOCUG00000001963	TNS1	47	-	2145	-	279	-	45	-
ENSOCUG00000002075	ENSOCUG00000002075	10	-	21	-	150	-	2	-
ENSOCUG00000002095	NR1H3	6	-	80	-	149	-	5	-
ENSOCUG00000002126	ENSOCUG00000002126	2	-	40	-	24	-	2	-
ENSOCUG00000002487	LGALS2	-	-	1	1	159	151	-	-
ENSOCUG00000002707	MID1IP1	-	-	-	-	5	-	-	-
ENSOCUG00000002811	ZBTB39	9	-	-	-	164	-	9	-
ENSOCUG00000002836	PCK2	6	-	89	-	331	-	4	-
ENSOCUG00000003048	TPPP	-	-	3	-	156	-	-	-
ENSOCUG00000003426	WSCD1	33	-	504	-	354	-	23	-
ENSOCUG00000003452	PPM1K	22	-	133	-	123	-	22	-
ENSOCUG00000003593	ACSL5	23	-	319	-	90	-	2	-
ENSOCUG00000003897	ENSOCUG00000003897	7	1	112	2	148	1	7	-
ENSOCUG00000003942	ENSOCUG00000003942	4	-	24	-	189	2	3	-
ENSOCUG00000004172	VSIG4	-	-	2	-	3	-	-	-
ENSOCUG00000004266	FAM222A	1	-	73	-	196	-	-	-
ENSOCUG00000004426	SOGA1	16	-	912	-	227	-	13	-
ENSOCUG00000004501	ENSOCUG00000004501	1	-	19	-	58	-	2	-
ENSOCUG00000005091	SERPINB9	31	-	482	-	388	-	-	-
ENSOCUG00000005286	CACNA2D2	11	-	152	-	158	-	9	-
ENSOCUG00000005306	C3orf18	-	-	2	-	66	-	-	-
ENSOCUG00000005669	ADGRD1	53	-	1905	-	192	1	29	-
ENSOCUG00000005679	ENSOCUG00000005679	1	-	223	2	46	-	-	-
ENSOCUG00000005680	ENSOCUG00000005680	-	-	131	-	180	1	-	-
ENSOCUG00000006561	ENSOCUG00000006561	52	-	205	-	444	-	15	-
ENSOCUG00000006633	KIF6	93	-	7639	-	326	-	27	-
ENSOCUG00000006999	C2	14	-	111	-	137	-	1	-
ENSOCUG00000007039	ENSOCUG00000007039	-	-	5	-	56	-	-	-
ENSOCUG00000007056	ENSOCUG00000007056	44	-	332	-	95	-	42	-
ENSOCUG00000007943	ENSOCUG00000007943	12	10	30	28	240	221	7	5
ENSOCUG00000008024	SMOX	21	-	215	-	478	-	17	-
ENSOCUG00000008165	MTFR1	4	-	639	1	5	-	1	-
ENSOCUG00000008416	ZNF398	8	-	196	-	182	-	7	-
ENSOCUG00000008841	GLUL	7	-	29	-	217	1	7	-
ENSOCUG00000009061	PACC1	20	-	1264	-	117	-	9	-
ENSOCUG00000009360	MST1R	2	-	1	-	3	-	-	-
ENSOCUG00000009644	TUBE1	12	-	217	3	108	2	4	-
ENSOCUG00000010253	TMEM209	21	-	352	-	314	1	4	-
ENSOCUG00000010790	C2CD2L	8	-	36	-	206	-	8	-
ENSOCUG00000011139	PLA2G4F	18	-	88	-	257	-	6	-
ENSOCUG00000011212	TP53I3	1	-	11	-	229	-	1	-
ENSOCUG00000011525	PPL	29	-	165	-	38	-	22	-
ENSOCUG00000011672	LSM11	5	-	3	-	241	-	1	-
ENSOCUG00000011700	VWA2	135	-	565	-	225	-	42	-
ENSOCUG00000011746	NR4A1	-	-	3	-	3	-	-	-
ENSOCUG00000012115	AXIN2	11	-	323	-	375	-	10	-
ENSOCUG00000012338	DDX3X	89	84	43	36	29	11	5	2
ENSOCUG00000013069	ELOVL6	6	-	120	-	164	-	-	-
ENSOCUG00000013427	DPEP2	26	-	147	-	194	-	-	-
ENSOCUG00000013450	MYH11	31	-	2064	-	217	-	25	-
ENSOCUG00000013715	C5orf34	15	-	252	-	182	-	5	-
ENSOCUG00000013904	CISH	-	-	4	-	11	-	-	-
ENSOCUG00000013960	DMGDH	73	-	2544	-	309	-	3	-
ENSOCUG00000014356	E2F3	12	-	1229	-	264	-	9	-
ENSOCUG00000015121	LRRC4	1	-	4	-	111	-	-	-
ENSOCUG00000015193	SLC45A4	20	-	785	-	328	-	8	-
ENSOCUG00000015248	SHISA2	2	-	2	-	187	-	2	-
ENSOCUG00000015275	ENSOCUG00000015275	8	-	23	-	117	-	16	-
ENSOCUG00000015462	PRRG1	-	-	33	-	5	-	-	-
ENSOCUG00000015538	ENSOCUG00000015538	3	-	734	-	264	-	-	-
ENSOCUG00000015724	SOCS7	-	-	8	-	5	-	-	-
ENSOCUG00000015898	SERINC2	4	-	110	-	218	-	3	-
ENSOCUG00000016014	NPFFR1	2	-	111	-	78	-	1	-
ENSOCUG00000016105	COLQ	2	-	693	-	133	-	1	-
ENSOCUG00000016890	PLVAP	6	-	10	-	151	-	1	-
ENSOCUG00000016960	ENSOCUG00000016960	5	5	84	82	373	364	4	4
ENSOCUG00000017707	P4HTM	-	-	9	-	20	-	4	-
ENSOCUG00000017934	ACVR1B	-	-	7	-	5	-	-	-
ENSOCUG00000017943	LCP1	58	-	566	-	265	-	12	-
ENSOCUG00000017952	DSCC1	2	-	3	-	8	3	-	-
ENSOCUG00000021037	ENSOCUG00000021037	1	-	4	-	25	-	-	-
ENSOCUG00000021086	ENSOCUG00000021086	22	-	156	-	228	-	6	-
ENSOCUG00000021619	MAFB	-	-	4	-	7	-	-	-
ENSOCUG00000022082	SH2B2	14	-	171	-	262	-	4	-
ENSOCUG00000022850	ENSOCUG00000022850	6	-	13	-	4	1	-	-
ENSOCUG00000023198	ENSOCUG00000023198	3	-	257	-	265	-	2	-
ENSOCUG00000023813	NME4	3	3	7	7	47	39	-	-
ENSOCUG00000024354	ENSOCUG00000024354	3	-	201	-	209	-	-	-
ENSOCUG00000024620	ENSOCUG00000024620	3	-	-	-	70	-	2	-
ENSOCUG00000024717	ENSOCUG00000024717	-	-	7	-	16	-	1	-
ENSOCUG00000025635	CAMKK2	-	-	18	-	8	-	1	-
ENSOCUG00000026253	ENSOCUG00000026253	5	-	-	-	96	-	-	-
ENSOCUG00000026351	ENSOCUG00000026351	11	-	160	-	111	-	11	-
ENSOCUG00000026479	SERPING1	-	-	4	-	4	-	-	-
ENSOCUG00000027125	ENSOCUG00000027125	20	3	360	47	197	53	-	-
ENSOCUG00000027198	SLC38A4	33	-	237	-	254	-	29	-
ENSOCUG00000027359		6	-	615	3	405	-	-	-
ENSOCUG00000027792	TMEM52	1	-	1	-	45	-	1	-
ENSOCUG00000027878	ENSOCUG00000027878	73	-	933	-	349	-	24	-
ENSOCUG00000027941	KCNMB4	1	-	657	65	180	84	1	-
ENSOCUG00000027981	ISG15	13	-	97	-	81	-	5	-
ENSOCUG00000029391	ZNF668	12	-	4	-	210	-	7	-
ENSOCUG00000029682	CFB	3	-	15	-	133	-	-	-
ENSOCUG00000029731	ENSOCUG00000029731	66	-	818	-	132	-	12	-
ENSOCUG00000031084	ENSOCUG00000031084	1	-	-	-	23	-	-	-
ENSOCUG00000032111	ENSOCUG00000032111	41	-	2	-	306	-	-	-
ENSOCUG00000032493	ENSOCUG00000032493	3	-	498	-	156	-	1	-
ENSOCUG00000034551	ENSOCUG00000034551	-	-	69	1	299	-	-	-
ENSOCUG00000035524	ENSOCUG00000035524	-	-	-	-	286	-	4	-
ENSOCUG00000036869	SMIM41	-	-	-	-	1	-	-	-
ENSOCUG00000036913	ENSOCUG00000036913	1	-	266	-	110	-	1	-
ENSOCUG00000039180	ENSOCUG00000039180	6	-	31	1	217	38	-	-
ENSOCUG00000039461	FAM110D	7	-	17	-	79	-	3	-
ENSOCUG00000039553	FPGS	54	-	110	-	255	-	30	-
