# Supplementary material for: Family-based Analysis of Allele-Specific Expression Reveals Mostly Simple, Intermediate-type of Inheritance
Source: Research Square preprint supplement (doi:10.21203/rs.3.rs-6515696/v1), 2025-06-05
Supplement: Supplementary file 11 [file ee1f67d7afee25fcf5cdfe85.xlsx]

## Sheet: H_L
CHROM	POS	mother_gt	child_1_gt	child_2_gt	child_3_gt	child_4_gt	child_5_gt	child_6_gt	child_7_gt	child_8_gt	father_gt	ENSEMBL ID	gene_start	gene_end	TFBS_start	TFBS_end	TF	strand	distance_to_gene	In_Exonic_Region	IN_GENE ENSEMBL ID	consensus_sequence	VAR_GT	VAR_POS_in_consensus
CM023775.1	26778994	AA	AB	AB	AB	AB	AB	AB	AB	AB	BB	ENSOCUG00000016709	26771140	26777026	26778988	26779000	Ar	+	1968	Not_in_Gene		GWACABNNTGTN	C/T	6
CM023775.1	26778994	AA	AB	AB	AB	AB	AB	AB	AB	AB	BB	ENSOCUG00000016709	26771140	26777026	26778988	26779000	NR3C2	+	1968	Not_in_Gene		GAACANNNWGTN	C/T	6
CM023775.1	26784729	AA	AB	AB	AB	AB	AB	AB	AB	AB	BB	ENSOCUG00000016709	26771140	26777026	26784722	26784732	Esrra	-	7703	No	ENSOCUG00000016696	NNNMAGGTCA	C/T	3
CM023775.1	26784760	AA	AB	AB	AB	AB	AB	AB	AB	AB	BB	ENSOCUG00000016709	26771140	26777026	26784754	26784766	ATF4	-	7734	No	ENSOCUG00000016696	GGATGAYGCAAT	G/A	6
CM023775.1	26784760	AA	AB	AB	AB	AB	AB	AB	AB	AB	BB	ENSOCUG00000016709	26771140	26777026	26784754	26784764	CEBPA	+	7734	No	ENSOCUG00000016696	ATTGCAYAAY	G/A	6
CM023775.1	26785659	AA	AB	AB	AB	AB	AB	AB	AB	AB	BB	ENSOCUG00000016709	26771140	26777026	26785653	26785665	MYCN	-	8633	No	ENSOCUG00000016696	NNCCACGTGGNN	C/T	6
CM023775.1	26785659	AA	AB	AB	AB	AB	AB	AB	AB	AB	BB	ENSOCUG00000016709	26771140	26777026	26785653	26785663	MAX::MYC	+	8633	No	ENSOCUG00000016696	NAMCACGTGBYN	C/T	6
CM023778.1	149890976	BB	AB	AB	AB	AB	AB	AB	AB	AB	AA	ENSOCUG00000013971	149814079	149884403	149890972	149890984	Hnf4a	+	6573	No	ENSOCUG00000035654	GKYCAAAGTYCA	C/T	4
CM023779.1	112118341	BB	AB	AB	AB	AB	AB	AB	AB	AB	AA	ENSOCUG00000015331	112101943	112114650	112118336	112118344	KLF4	+	3691	No	ENSOCUG00000015344	CCCRCCCT	T/C	5
CM023781.1	33304205	AA	AB	AB	AB	AB	AB	AB	AB	AB	BB	ENSOCUG00000009088	33297093	33302746	33304196	33304208	Sox2	-	1459	Not_in_Gene		NNCCATTGTTNN	T/A	3
CM023783.1	35009235	AA	AB	AB	AB	AB	AB	AB	AB	AB	BB	ENSOCUG00000010546	35011342	35015471	35009232	35009244	FOXA1	-	-2107	No	ENSOCUG00000010533	BNNTGTTTACWY	G/A	9
CM023783.1	35015942	BB	AB	AB	AB	AB	AB	AB	AB	AB	AA	ENSOCUG00000010546	35011342	35015471	35015941	35015949	KLF4	-	471	Yes	ENSOCUG00000010550	CCCRCCCT	A/G	7
CM023783.1	35016207	BB	AB	AB	AB	AB	AB	AB	AB	AB	AA	ENSOCUG00000010546	35011342	35015471	35016204	35016214	TCF4	-	736	No	ENSOCUG00000010550	TGCABCTGBK	C/CCCCTG	7
CM023783.1	35016207	BB	AB	AB	AB	AB	AB	AB	AB	AB	AA	ENSOCUG00000010546	35011342	35015471	35016204	35016214	TAL1::TCF3	+	736	No	ENSOCUG00000010550	RMCAGCTGYT	C/CCCCTG	3
CM023783.1	35016468	BB	AB	AB	AB	AB	AB	AB	AB	AB	AA	ENSOCUG00000010546	35011342	35015471	35016462	35016474	SP1	+	997	Yes	ENSOCUG00000010550	BCMCYTCCYCYY	G/T	6
CM023783.1	35018868	AA	AB	AB	AB	AB	AB	AB	AB	AB	BB	ENSOCUG00000010546	35011342	35015471	35018860	35018872	SNAI2	-	3397	No	ENSOCUG00000010554	SRGCAGGTGCVS	A/C	4
CM023783.1	35018871	AA	AB	AB	AB	AB	AB	AB	AB	AB	BB	ENSOCUG00000010546	35011342	35015471	35018860	35018872	SNAI2	-	3400	No	ENSOCUG00000010554	SRGCAGGTGCVS	A/G	1
CM023783.1	38888043	BB	AB	AB	AB	AB	AB	AB	AB	AB	AA	ENSOCUG00000017890	38829980	38883920	38888038	38888050	Rxra	+	4123	Not_in_Gene		RGGTCAAAGGTC	T/C	5
CM023783.1	89705724	BB	AB	AB	AB	AB	AB	AB	AB	AB	AA	ENSOCUG00000004534	89498699	89696498	89705720	89705732	NFYA	-	9226	Not_in_Gene		RRCCAATCAGMR	T/C	8
CM023783.1	89705724	BB	AB	AB	AB	AB	AB	AB	AB	AB	AA	ENSOCUG00000004534	89498699	89696498	89705724	89705736	NFYB	-	9226	Not_in_Gene		AAYSRRCCAATC	T/C	12
CM023784.1	128688627	BB	AB	AB	AB	AB	AB	AB	AB	AB	AA	ENSOCUG00000023058	128697043	128703770	128688615	128688627	NR2F1	-	-8416	Not_in_Gene		CARAGGTCAAVN	A/G	0
CM023789.1	17679004	AA	AB	AB	AB	AB	AB	AB	AB	AB	BB	ENSOCUG00000006382	17683286	17736712	17679004	17679014	PAX5	+	-4282	Not_in_Gene		WGCRTGACYM	G/A	0
CM023789.1	35979652	BB	AB	AB	AB	AB	AB	AB	AB	AB	AA	ENSOCUG00000032475	35960580	35975704	35979640	35979652	NR3C2	-	3948	Not_in_Gene		GAACANNNWGTN	T/C	0
CM023789.1	35979652	BB	AB	AB	AB	AB	AB	AB	AB	AB	AA	ENSOCUG00000032475	35960580	35975704	35979640	35979652	Ar	-	3948	Not_in_Gene		GWACABNNTGTN	T/C	0
CM023790.1	37316824	AA	AB	AB	AB	AB	AB	AB	AB	AB	BB	ENSOCUG00000002754	37319223	37360483	37316816	37316828	Ar	+	-2399	Not_in_Gene		GWACABNNTGTN	A/G	8
CM023790.1	37317856	AA	AB	AB	AB	AB	AB	AB	AB	AB	BB	ENSOCUG00000002754	37319223	37360483	37317852	37317862	Ahr::Arnt	-	-1367	Not_in_Gene		VKACGTGC	A/T	6
CM023790.1	37364217	BB	AB	AB	AB	AB	AB	AB	AB	AB	AA	ENSOCUG00000002754	37319223	37360483	37364205	37364217	SP1	-	3734	Not_in_Gene		BCMCYTCCYCYY	C/T	0
CM023790.1	37364217	BB	AB	AB	AB	AB	AB	AB	AB	AB	AA	ENSOCUG00000002754	37319223	37360483	37364216	37364228	BHLHE41	-	3734	Not_in_Gene		NVVCAGCTGCWS	C/T	11
CM023790.1	37364217	BB	AB	AB	AB	AB	AB	AB	AB	AB	AA	ENSOCUG00000002754	37319223	37360483	37364216	37364228	MYCN	+	3734	Not_in_Gene		NNCCACGTGGNN	C/T	1
CM023790.1	37364217	BB	AB	AB	AB	AB	AB	AB	AB	AB	AA	ENSOCUG00000002754	37319223	37360483	37364217	37364227	MYC	-	3734	Not_in_Gene		GCCAYGTGSY	C/T	10
CM023790.1	37364217	BB	AB	AB	AB	AB	AB	AB	AB	AB	AA	ENSOCUG00000002754	37319223	37360483	37364217	37364227	TCF3	-	3734	Not_in_Gene		RMCAGCTGYT	C/T	10
CM023790.1	37364217	BB	AB	AB	AB	AB	AB	AB	AB	AB	AA	ENSOCUG00000002754	37319223	37360483	37364217	37364227	TAL1::TCF3	-	3734	Not_in_Gene			C/T	10

## Sheet: H_M or M_L
CHROM	POS	mother_gt	child_1_gt	child_2_gt	child_3_gt	child_4_gt	child_5_gt	child_6_gt	child_7_gt	child_8_gt	father_gt	ENSEMBL ID	gene_start	gene_end	TFBS_start	TFBS_end	TF	strand	distance_to_gene	In_Exonic_Region	IN_GENE ENSEMBL ID	consensus_sequence	VAR_GT	VAR_POS_in_consensus
CM023773.1	115375170	AB	AB	AA	AA	AA	AB	AA	AB	AA	AA	ENSOCUG00000016960	115375937	115381969	115375160	115375172	Foxa2	-	-767	Not_in_Gene		TGTTTACWYAGB	A/G	2
CM023773.1	115375170	AB	AB	AA	AA	AA	AB	AA	AB	AA	AA	ENSOCUG00000016960	115375937	115381969	115375162	115375172	MYBL2	+	-767	Not_in_Gene		WRWGTAAACA	A/G	8
CM023773.1	115375170	AB	AB	AA	AA	AA	AB	AA	AB	AA	AA	ENSOCUG00000016960	115375937	115381969	115375163	115375175	FOXA1	-	-767	Not_in_Gene		BNNTGTTTACWY	A/G	5
CM023775.1	117789792	BB	AB	AB	AB	BB	AB	AB	AB	BB	AB	ENSOCUG00000002487	117796962	117800514	117789784	117789796	TFAP2A-var.2	+	-7170	Not_in_Gene		GSCCTSAGGSHA	G/T	8
CM023784.1	142202231	AB	AB	BB	BB	AB	AB	BB	BB	AB	BB	ENSOCUG00000007943	142198587	142201798	142202231	142202241	ZNF263	+	433	Not_in_Gene		RGGAGGASBA	A/T	0

## Sheet: L_H
CHROM	POS	mother_gt	child_1_gt	child_2_gt	child_3_gt	child_4_gt	child_5_gt	child_6_gt	child_7_gt	child_8_gt	father_gt	ENSEMBL ID	gene_start	gene_end	TFBS_start	TFBS_end	TF	strand	distance_to_gene	In_Exonic_Region	IN_GENE ENSEMBL ID	consensus_sequence	VAR_GT	VAR_POS_in_consensus
CM023773.1	69669141	BB	AB	AB	AB	AB	AB	AB	AB	AB	AA	ENSOCUG00000005617	69645599	69661343	69669132	69669144	ATF4	+	7798	Not_in_Gene		GGATGAYGCAAT	C/T	9
CM023773.1	69669141	BB	AB	AB	AB	AB	AB	AB	AB	AB	AA	ENSOCUG00000005617	69645599	69661343	69669133	69669145	CEBPB	+	7798	Not_in_Gene		DATTATGCAATM	C/T	8
CM023773.1	69669141	BB	AB	AB	AB	AB	AB	AB	AB	AB	AA	ENSOCUG00000005617	69645599	69661343	69669134	69669144	CEBPD	+	7798	Not_in_Gene		RTTDYGCAAT	C/T	7
CM023773.1	69669141	BB	AB	AB	AB	AB	AB	AB	AB	AB	AA	ENSOCUG00000005617	69645599	69661343	69669135	69669145	NFIL3	+	7798	Not_in_Gene		TTAYGYAAYN	C/T	6
CM023773.1	69669285	BB	AB	AB	AB	AB	AB	AB	AB	AB	AA	ENSOCUG00000005617	69645599	69661343	69669273	69669285	NR3C2	-	7942	Not_in_Gene		GAACANNNWGTN	C/T	0
CM023773.1	69669461	BB	AB	AB	AB	AB	AB	AB	AB	AB	AA	ENSOCUG00000005617	69645599	69661343	69669452	69669464	Rxra	+	8118	Not_in_Gene		RGGTCAAAGGTC	G/T	9
CM023773.1	69669464	BB	AB	AB	AB	AB	AB	AB	AB	AB	AA	ENSOCUG00000005617	69645599	69661343	69669452	69669464	Rxra	+	8121	Not_in_Gene		RGGTCAAAGGTC	C/T	12
CM023773.1	69670510	BB	AB	AB	AB	AB	AB	AB	AB	AB	AA	ENSOCUG00000005617	69645599	69661343	69670507	69670517	EGR2	-	9167	Not_in_Gene		CCKCCCMCKC	G/A	7
CM023773.1	110097419	BB	AB	AB	AB	AB	AB	AB	AB	AB	AA	ENSOCUG00000009100	110089061	110093107	110097414	110097424	NFIC	-	4312	Yes	ENSOCUG00000003328	BWBTTGGCAV	C/T	5
CM023773.1	110097515	BB	AB	AB	AB	AB	AB	AB	AB	AB	AA	ENSOCUG00000009100	110089061	110093107	110097508	110097520	CTCF	+	4408	Yes	ENSOCUG00000003328	CCACYAGGGGGC	A/C	7
CM023773.1	110097517	BB	AB	AB	AB	AB	AB	AB	AB	AB	AA	ENSOCUG00000009100	110089061	110093107	110097508	110097520	CTCF	+	4410	Yes	ENSOCUG00000003328	CCACYAGGGGGC	G/C	9
CM023773.1	110098067	BB	AB	AB	AB	AB	AB	AB	AB	AB	AA	ENSOCUG00000009100	110089061	110093107	110098063	110098073	TCF4	-	4960	Yes	ENSOCUG00000003328	TGCABCTGBK	A/G	6
CM023773.1	110098537	BB	AB	AB	AB	AB	AB	AB	AB	AB	AA	ENSOCUG00000009100	110089061	110093107	110098536	110098548	TFAP2A-var.2	+	5430	No	ENSOCUG00000003328		CG/C	1
CM023773.1	110099667	BB	AB	AB	AB	AB	AB	AB	AB	AB	AA	ENSOCUG00000009100	110089061	110093107	110099658	110099670	ZNF740	-	6560	Yes	ENSOCUG00000003328	CCCCCCCCCCCC	C/T	3
CM023775.1	15579128	AA	AB	AB	AB	AB	AB	AB	AB	AB	BB	ENSOCUG00000004260	15584740	15596385	15579124	15579132	PDX1	-	-5612	Not_in_Gene			G/A	4
CM023775.1	15582876	BB	AB	AB	AB	AB	AB	AB	AB	AB	AA	ENSOCUG00000004260	15584740	15596385	15582876	15582888	FOS	-	-1864	Not_in_Gene		DRTGASTCATHN	TG/T	12
CM023775.1	15582878	BB	AB	AB	AB	AB	AB	AB	AB	AB	AA	ENSOCUG00000004260	15584740	15596385	15582876	15582888	FOS	-	-1862	Not_in_Gene		DRTGASTCATHN	ACTG/A	10
CM023776.1	46755789	AA	AB	AB	AB	AB	AB	AB	AB	AB	BB	ENSOCUG00000016775	46763129	46768392	46755783	46755795	EGR1	-	-7340	No	ENSOCUG00000006002	CCGCCCACRCMY	C/CG	6
CM023776.1	48954962	AA	AB	AB	AB	AB	AB	AB	AB	AB	BB	ENSOCUG00000000515	48943374	48950845	48954957	48954969	JUND	-	4117	Yes	ENSOCUG00000002943	DATGASTCAYHN	G/A	7
CM023776.1	56240404	AA	AB	AB	AB	AB	AB	AB	AB	AB	BB	ENSOCUG00000017794	56247500	56253547	56240402	56240414	TFAP2A	-	-7096	Not_in_Gene		GSCCTSAGGSHA	C/T	10
CM023776.1	56240406	AA	AB	AB	AB	AB	AB	AB	AB	AB	BB	ENSOCUG00000017794	56247500	56253547	56240402	56240414	TFAP2A	-	-7094	Not_in_Gene		GSCCTSAGGSHA	C/T	8
CM023776.1	56242723	BB	AB	AB	AB	AB	AB	AB	AB	AB	AA	ENSOCUG00000017794	56247500	56253547	56242713	56242725	GATA5	-	-4777	Not_in_Gene		NNWGATAASRNN	A/T	2
CM023776.1	56242723	BB	AB	AB	AB	AB	AB	AB	AB	AB	AA	ENSOCUG00000017794	56247500	56253547	56242713	56242725	GATA3	-	-4777	Not_in_Gene		NNAGATAAGRNN	A/T	2
CM023779.1	106371487	BB	AB	AB	AB	AB	AB	AB	AB	AB	AA	ENSOCUG00000001956	106371773	106419517	106371482	106371492	ETS1	-	-286	Not_in_Gene			T/A	5
CM023781.1	71226342	AA	AB	AB	AB	AB	AB	AB	AB	AB	BB	ENSOCUG00000026591	71227025	71559995	71226339	71226349	TEAD1	+	-683	Not_in_Gene		BACATTCCAR	C/CA	3
CM023781.1	71226342	AA	AB	AB	AB	AB	AB	AB	AB	AB	BB	ENSOCUG00000026591	71227025	71559995	71226339	71226349	TEAD4	+	-683	Not_in_Gene		YACATTCCAG	C/CA	3
CM023783.1	35009235	AA	AB	AB	AB	AB	AB	AB	AB	AB	BB	ENSOCUG00000010550	35014955	35017758	35009232	35009244	FOXA1	-	-5720	No	ENSOCUG00000010533	BNNTGTTTACWY	G/A	9
CM023783.1	35018868	AA	AB	AB	AB	AB	AB	AB	AB	AB	BB	ENSOCUG00000010550	35014955	35017758	35018860	35018872	SNAI2	-	1110	No	ENSOCUG00000010554	SRGCAGGTGCVS	A/C	4
CM023783.1	35018871	AA	AB	AB	AB	AB	AB	AB	AB	AB	BB	ENSOCUG00000010550	35014955	35017758	35018860	35018872	SNAI2	-	1113	No	ENSOCUG00000010554	SRGCAGGTGCVS	A/G	1
CM023783.1	137610092	BB	AB	AB	AB	AB	AB	AB	AB	AB	AA	ENSOCUG00000002119	137507515	137607525	137610083	137610095	Tcf12	-	2567	Not_in_Gene		RVCAGCTGBNNN	G/A	3
CM023783.1	137610092	BB	AB	AB	AB	AB	AB	AB	AB	AB	AA	ENSOCUG00000002119	137507515	137607525	137610085	137610095	TCF3	-	2567	Not_in_Gene		RMCAGCTGYT	G/A	3
CM023783.1	137610092	BB	AB	AB	AB	AB	AB	AB	AB	AB	AA	ENSOCUG00000002119	137507515	137607525	137610085	137610095	TAL1::TCF3	+	2567	Not_in_Gene		RMCAGCTGYT	G/A	7
CM023784.1	113134121	BB	AB	AB	AB	AB	AB	AB	AB	AB	AA	ENSOCUG00000015382	113115018	113133790	113134120	113134128	PDX1	+	331	Not_in_Gene			A/C	1
CM023784.1	113134123	BB	AB	AB	AB	AB	AB	AB	AB	AB	AA	ENSOCUG00000015382	113115018	113133790	113134120	113134128	PDX1	+	333	Not_in_Gene			C/T	3
CM023784.1	113134325	BB	AB	AB	AB	AB	AB	AB	AB	AB	AA	ENSOCUG00000015382	113115018	113133790	113134315	113134327	FOSL1	-	535	Not_in_Gene		NATGASTCAYHN	A/G	2
CM023784.1	113134325	BB	AB	AB	AB	AB	AB	AB	AB	AB	AA	ENSOCUG00000015382	113115018	113133790	113134315	113134327	FOS	-	535	Not_in_Gene		DRTGASTCATHN	A/G	2
CM023784.1	113134325	BB	AB	AB	AB	AB	AB	AB	AB	AB	AA	ENSOCUG00000015382	113115018	113133790	113134315	113134327	JUND	-	535	Not_in_Gene		DATGASTCAYHN	A/G	2
CM023784.1	117472629	AA	AB	AB	AB	AB	AB	AB	AB	AB	BB	ENSOCUG00000009330	117481273	117511870	117472626	117472636	EGR2	-	-8644	Not_in_Gene		CCKCCCMCKC	C/G	7
CM023784.1	128352379	AA	AB	AB	AB	AB	AB	AB	AB	AB	BB	ENSOCUG00000015831	128353709	128355908	128352375	128352387	FOS	-	-1330	Not_in_Gene		DRTGASTCATHN	C/T	8
CM023784.1	128446399	AA	AB	AB	AB	AB	AB	AB	AB	AB	BB	ENSOCUG00000002342	128422618	128436889	128446392	128446404	FOXA1	-	9510	Not_in_Gene		BNNTGTTTACWY	T/A	5
CM023785.1	109978089	AA	AB	AB	AB	AB	AB	AB	AB	AB	BB	ENSOCUG00000010818	109985357	110044384	109978088	109978100	Sox2	-	-7268	No	ENSOCUG00000010793	NNCCATTGTTNN	T/C	11
CM023785.1	109978470	BB	AB	AB	AB	AB	AB	AB	AB	AB	AA	ENSOCUG00000010818	109985357	110044384	109978463	109978475	EBF1	+	-6887	No	ENSOCUG00000010793	TTCCCMAGGGAC	A/G	7
CM023785.1	131767186	AA	AB	AB	AB	AB	AB	AB	AB	AB	BB	ENSOCUG00000011677	131768205	131827105	131767180	131767192	Foxa2	-	-1019	Not_in_Gene		TGTTTACWYAGB	G/A	6
CM023785.1	131767186	AA	AB	AB	AB	AB	AB	AB	AB	AB	BB	ENSOCUG00000011677	131768205	131827105	131767183	131767195	FOXA1	-	-1019	Not_in_Gene		BNNTGTTTACWY	G/A	9
CM023786.1	29774551	BB	AB	AB	AB	AB	AB	AB	AB	AB	AA	ENSOCUG00000003388	29774561	29842495	29774543	29774555	MEIS1	-	-10	Not_in_Gene		NNHTGACAGNNN	T/C	4
CM023786.1	29842503	BB	AB	AB	AB	AB	AB	AB	AB	AB	AA	ENSOCUG00000003388	29774561	29842495	29842493	29842505	MYCN	+	8	No	ENSOCUG00000011382	NNCCACGTGGNN	G/C	10
CM023786.1	29842503	BB	AB	AB	AB	AB	AB	AB	AB	AB	AA	ENSOCUG00000003388	29774561	29842495	29842494	29842504	MYC	+	8	No	ENSOCUG00000011382	GCCAYGTGSY	G/C	9
CM023786.1	35292624	AA	AB	AB	AB	AB	AB	AB	AB	AB	BB	ENSOCUG00000010456	35294240	35683252	35292619	35292627	ZBTB7A	-	-1616	Not_in_Gene		SMGGAAAY	G/A	3
CM023786.1	35684984	BB	AB	AB	AB	AB	AB	AB	AB	AB	AA	ENSOCUG00000010456	35294240	35683252	35684977	35684989	ATF4	+	1732	Not_in_Gene		GGATGAYGCAAT	T/C	7
CM023786.1	35685255	AA	AB	AB	AB	AB	AB	AB	AB	AB	BB	ENSOCUG00000010456	35294240	35683252	35685243	35685255	EBF1	+	2003	Not_in_Gene		TTCCCMAGGGAC	A/G	12
CM023788.1	66040308	BB	AB	AB	AB	AB	AB	AB	AB	AB	AA	ENSOCUG00000021716	66041978	66053665	66040304	66040316	Tcf7	+	-1670	Not_in_Gene		NDASATCAAAGG	A/G	4
CM023788.1	66040315	AA	AB	AB	AB	AB	AB	AB	AB	AB	BB	ENSOCUG00000021716	66041978	66053665	66040304	66040316	Tcf7	+	-1663	Not_in_Gene		NDASATCAAAGG	C/T	11
CM023788.1	66040315	AA	AB	AB	AB	AB	AB	AB	AB	AB	BB	ENSOCUG00000021716	66041978	66053665	66040315	66040327	CTCF	-	-1663	Not_in_Gene		CCACYAGGGGGC	C/T	12
CM023788.1	66040469	AA	AB	AB	AB	AB	AB	AB	AB	AB	BB	ENSOCUG00000021716	66041978	66053665	66040462	66040474	Foxa2	-	-1509	Not_in_Gene		TGTTTACWYAGB	T/C	5
CM023789.1	26674039	BB	AB	AB	AB	AB	AB	AB	AB	AB	AA	ENSOCUG00000013992	26628948	26673410	26674032	26674042	REL	-	629	Not_in_Gene		GGGRAWTTCC	C/T	3
CM023789.1	26674039	BB	AB	AB	AB	AB	AB	AB	AB	AB	AA	ENSOCUG00000013992	26628948	26673410	26674032	26674042	RELA	-	629	Not_in_Gene		GGGRAWTTCC	C/T	3
CM023790.1	28782943	BB	AB	AB	AB	AB	AB	AB	AB	AB	AA	ENSOCUG00000038496	28792303	28838508	28782938	28782950	Nfe2l2	+	-9360	Not_in_Gene		NWGMTGASTCAT	T/G	5
CM023790.1	28782943	BB	AB	AB	AB	AB	AB	AB	AB	AB	AA	ENSOCUG00000038496	28792303	28838508	28782940	28782952	FOSL2	-	-9360	Not_in_Gene		NDVTGASTCATH	T/G	9
CM023790.1	28782943	BB	AB	AB	AB	AB	AB	AB	AB	AB	AA	ENSOCUG00000038496	28792303	28838508	28782940	28782952	NFE2	+	-9360	Not_in_Gene		GMTGAGTCAKCA	T/G	3
CM023790.1	28782943	BB	AB	AB	AB	AB	AB	AB	AB	AB	AA	ENSOCUG00000038496	28792303	28838508	28782940	28782952	FOSL1	+	-9360	Not_in_Gene		NATGASTCAYHN	T/G	3
CM023790.1	28782943	BB	AB	AB	AB	AB	AB	AB	AB	AB	AA	ENSOCUG00000038496	28792303	28838508	28782940	28782952	JUND	+	-9360	Not_in_Gene		DATGASTCAYHN	T/G	3
CM023790.1	43259738	BB	AB	AB	AB	AB	AB	AB	AB	AB	AA	ENSOCUG00000013324	43258101	43259492	43259735	43259747	BHLHE41	-	246	Not_in_Gene		NVVCAGCTGCWS	G/A	9
CM023790.1	43260816	BB	AB	AB	AB	AB	AB	AB	AB	AB	AA	ENSOCUG00000013324	43258101	43259492	43260811	43260821	TCF3	-	1324	Yes	ENSOCUG00000026428	RMCAGCTGYT	A/G	5
CM023790.1	43260816	BB	AB	AB	AB	AB	AB	AB	AB	AB	AA	ENSOCUG00000013324	43258101	43259492	43260811	43260821	TAL1::TCF3	-	1324	Yes	ENSOCUG00000026428	RMCAGCTGYT	A/G	5
CM023790.1	43260816	BB	AB	AB	AB	AB	AB	AB	AB	AB	AA	ENSOCUG00000013324	43258101	43259492	43260811	43260821	TCF4	-	1324	Yes	ENSOCUG00000026428	TGCABCTGBK	A/G	5
CM023790.1	43260816	BB	AB	AB	AB	AB	AB	AB	AB	AB	AA	ENSOCUG00000013324	43258101	43259492	43260811	43260823	Tcf12	+	1324	Yes	ENSOCUG00000026428	RVCAGCTGBNNN	A/G	5
CM023790.1	43260887	AA	AB	AB	AB	AB	AB	AB	AB	AB	BB	ENSOCUG00000013324	43258101	43259492	43260881	43260893	RUNX1	+	1395	Yes	ENSOCUG00000026428	NNWTGTGGTTWN	TG/T	6

## Sheet: L_M OR M_H
CHROM	POS	mother_gt	child_1_gt	child_2_gt	child_3_gt	child_4_gt	child_5_gt	child_6_gt	child_7_gt	child_8_gt	father_gt	ENSEMBL ID	gene_start	gene_end	TFBS_start	TFBS_end	TF	strand	distance_to_gene	In_Exonic_Region	IN_GENE ENSEMBL ID	consensus_sequence	VAR_GT	VAR_POS_in_consensus
CM023775.1	15765580	BB	BB	AB	AB	BB	AB	AB	BB	BB	AB	ENSOCUG00000004099	15774700	15798748	15765568	15765580	FOXA1	-	-9120	Not_in_Gene		BNNTGTTTACWY	C/T	0
CM023775.1	15766131	BB	BB	AB	AB	BB	AB	AB	BB	BB	AB	ENSOCUG00000004099	15774700	15798748	15766129	15766141	MYCN	+	-8569	Not_in_Gene		NNCCACGTGGNN	A/G	2
CM023775.1	15774479	AA	AA	AB	AB	AA	AB	AB	AA	AA	AB	ENSOCUG00000004099	15774700	15798748	15774477	15774487	Gabpa	-	-221	Not_in_Gene		CAGGAAGTRV	C/A	8
CM023775.1	15807388	BB	BB	AB	AB	BB	AB	AB	BB	BB	AB	ENSOCUG00000004099	15774700	15798748	15807380	15807392	NFKB1	-	8640	Not_in_Gene		NGGGGAATTCCC	T/G	4
CM023779.1	126827595	AA	AB	AB	AB	AB	AB	AB	AB	AA	AB	ENSOCUG00000016210	126836446	126837156	126827589	126827599	Mecom	-	-8851	No	ENSOCUG00000016191	GATAAGRNWD	C/T	4
CM023779.1	126827595	AA	AB	AB	AB	AB	AB	AB	AB	AA	AB	ENSOCUG00000016210	126836446	126837156	126827590	126827602	GATA5	-	-8851	No	ENSOCUG00000016191	NNWGATAASRNN	C/T	7
CM023779.1	126827595	AA	AB	AB	AB	AB	AB	AB	AB	AA	AB	ENSOCUG00000016210	126836446	126837156	126827590	126827602	GATA3	-	-8851	No	ENSOCUG00000016191	NNAGATAAGRNN	C/T	7
CM023779.1	126827595	AA	AB	AB	AB	AB	AB	AB	AB	AA	AB	ENSOCUG00000016210	126836446	126837156	126827592	126827604	Gata4	+	-8851	No	ENSOCUG00000016191	YCTTATCTBHNN	C/T	3
CM023784.1	51322770	BB	BB	BB	AB	BB	BB	BB	BB	AB	AB	ENSOCUG00000013456	51323357	51387823	51322765	51322775	RELA	-	-587	Not_in_Gene		GGGRAWTTCC	T/C	5
CM023786.1	64167786	AA	AA	AA	AB	AB	AA	AB	AA	AA	AB	ENSOCUG00000029357	64169002	64191115	64167779	64167787	ZBTB7A	+	-1216	Not_in_Gene		SMGGAAAY	G/A	7
CM023786.1	64196400	AA	AA	AA	AB	AB	AA	AB	AA	AA	AB	ENSOCUG00000029357	64169002	64191115	64196392	64196404	YY1	+	5285	Not_in_Gene		HAAAATGGCKGC	C/CT	8
CM023788.1	66453019	AB	AB	BB	BB	AB	BB	AB	AB	BB	BB	ENSOCUG00000002151	66453733	66456330	66453014	66453026	FOXA1	+	-714	Not_in_Gene		BNNTGTTTACWY	G/A	5
CM023788.1	66453019	AB	AB	BB	BB	AB	BB	AB	AB	BB	BB	ENSOCUG00000002151	66453733	66456330	66453017	66453029	Foxa2	+	-714	Not_in_Gene		TGTTTACWYAGB	G/A	2
CM023788.1	66456428	AB	AB	BB	BB	AB	BB	AB	AB	BB	BB	ENSOCUG00000002151	66453733	66456330	66456419	66456429	STAT3	+	98	Not_in_Gene		NTTCCCGGAA	A/G	9
CM023790.1	59479625	AA	AB	AB	AA	AB	AB	AA	AB	AA	AB	ENSOCUG00000000422	59475597	59478656	59479618	59479628	Klf1	+	969	No	ENSOCUG00000027404	GGCCACRCCC	G/A	7

## Sheet: M_M
CHROM	POS	mother_gt	child_1_gt	child_2_gt	child_3_gt	child_4_gt	child_5_gt	child_6_gt	child_7_gt	child_8_gt	father_gt	ENSEMBL ID	gene_start	gene_end	TFBS_start	TFBS_end	TF	strand	distance_to_gene	In_Exonic_Region	IN_GENE ENSEMBL ID	consensus_sequence	VAR_GT	VAR_POS_in_consensus
CM023772.1	105998337	AB	AB	AB	AA	AB	AB	AB	AB	AA	AB	ENSOCUG00000025228	105929361	105992059	105998331	105998343	Tcf12	-	6278	No	ENSOCUG00000010162	RVCAGCTGBNNN	A/G	6
CM023772.1	105998337	AB	AB	AB	AA	AB	AB	AB	AB	AA	AB	ENSOCUG00000025228	105929361	105992059	105998332	105998344	TFAP4	-	6278	No	ENSOCUG00000010162	NMMCAGCTGWTN	A/G	7
CM023772.1	105998337	AB	AB	AB	AA	AB	AB	AB	AB	AA	AB	ENSOCUG00000025228	105929361	105992059	105998332	105998344	Tcf21	-	6278	No	ENSOCUG00000010162	NVMCAGCTGSWN	A/G	7
CM023772.1	105998337	AB	AB	AB	AA	AB	AB	AB	AB	AA	AB	ENSOCUG00000025228	105929361	105992059	105998333	105998343	TCF3	-	6278	No	ENSOCUG00000010162	RMCAGCTGYT	A/G	6
CM023772.1	105998337	AB	AB	AB	AA	AB	AB	AB	AB	AA	AB	ENSOCUG00000025228	105929361	105992059	105998333	105998343	NEUROD1	+	6278	No	ENSOCUG00000010162	RRCAGATGGY	A/G	4
CM023772.1	105998904	AB	AB	AB	AA	AB	AB	AB	AB	AA	AB	ENSOCUG00000025228	105929361	105992059	105998893	105998905	GATA3	-	6845	No	ENSOCUG00000010162	NNAGATAAGRNN	G/C	1
CM023772.1	105998904	AB	AB	AB	AA	AB	AB	AB	AB	AA	AB	ENSOCUG00000025228	105929361	105992059	105998894	105998904	GATA2	+	6845	No	ENSOCUG00000010162	NBCTTATCTB	G/C	10
CM023772.1	105998904	AB	AB	AB	AA	AB	AB	AB	AB	AA	AB	ENSOCUG00000025228	105929361	105992059	105998894	105998904	Gata1	+	6845	No	ENSOCUG00000010162	NTSTTATCTK	G/C	10
CM023772.1	105998904	AB	AB	AB	AA	AB	AB	AB	AB	AA	AB	ENSOCUG00000025228	105929361	105992059	105998895	105998907	Gata4	+	6845	No	ENSOCUG00000010162	YCTTATCTBHNN	G/C	9
CM023772.1	105998942	AB	AB	AB	AA	AB	AB	AB	AB	AA	AB	ENSOCUG00000025228	105929361	105992059	105998931	105998943	MYBL1	+	6883	No	ENSOCUG00000010162	ACCGTTAACSGY	T/G	11
CM023772.1	105998942	AB	AB	AB	AA	AB	AB	AB	AB	AA	AB	ENSOCUG00000025228	105929361	105992059	105998936	105998948	RUNX1	+	6883	No	ENSOCUG00000010162	NNWTGTGGTTWN	T/G	6
